# Supplementary material for: Bioorthogonal pro-metabolites for profiling short chain fatty acylation
Source: Chem Sci. 2017 Dec 8;9(5):1236–41. doi: 10.1039/c7sc00247e (PMC5885804; doi:10.1039/c7sc00247e)
Supplement: Supplementary file 1 [file SC-009-C7SC00247E-s001.xlsx]

## Sheet: Table S1
Accession	Description	SCFA 6 (rep #1)	SCFA 6 (rep #2)	SCFA 6 (rep #3)	control (rep #1)	control (rep #2)	average (SCFA 6)	average (control)	fold enrichment (SCFA/control)	known SCFA target (Hang et al. JACS 2010)
Q8TEX9	Importin-4 OS=Homo sapiens GN=IPO4 PE=1 SV=2 - [IPO4_HUMAN]	11	14	9	0	0	11.3333	0	>35	n
O14980	Exportin-1 OS=Homo sapiens GN=XPO1 PE=1 SV=1 - [XPO1_HUMAN]	11	8	9	0	0	9.33333	0	>35	not det.
P30154	Serine/threonine-protein phosphatase 2A 65 kDa regulatory subunit A beta isoform OS=Homo sapiens GN=PPP2R1B PE=1 SV=3 - [2AAB_HUMAN]	8	9	6	0	0	7.66667	0	>35	not det.
P25205	DNA replication licensing factor MCM3 OS=Homo sapiens GN=MCM3 PE=1 SV=3 - [MCM3_HUMAN]	5	8	9	0	0	7.33333	0	>35	not det.
V9H019	DNA mismatch repair protein Msh2 OS=Homo sapiens GN=MSH2 PE=1 SV=1 - [V9H019_HUMAN]	5	9	6	0	0	6.66667	0	>35	not det.
C9JCA9	Leucine-rich PPR motif-containing protein, mitochondrial (Fragment) OS=Homo sapiens GN=LRPPRC PE=1 SV=1 - [C9JCA9_HUMAN]	10	6	4	0	0	6.66667	0	>35	not det.
Q07021	Complement component 1 Q subcomponent-binding protein, mitochondrial OS=Homo sapiens GN=C1QBP PE=1 SV=1 - [C1QBP_HUMAN]	8	6	6	0	0	6.66667	0	>35	not det.
P52597	Heterogeneous nuclear ribonucleoprotein F OS=Homo sapiens GN=HNRNPF PE=1 SV=3 - [HNRPF_HUMAN]	7	8	4	0	0	6.33333	0	>35	not det.
F8VPD4	CAD protein OS=Homo sapiens GN=CAD PE=1 SV=1 - [F8VPD4_HUMAN]	3	6	10	0	0	6.33333	0	>35	not det.
A0A087WY61	Nuclear mitotic apparatus protein 1 OS=Homo sapiens GN=NUMA1 PE=1 SV=1 - [A0A087WY61_HUMAN]	5	7	6	0	0	6	0	>35	not det.
Q9HAV4	Exportin-5 OS=Homo sapiens GN=XPO5 PE=1 SV=1 - [XPO5_HUMAN]	7	6	4	0	0	5.66667	0	>35	not det.
P06748	Nucleophosmin OS=Homo sapiens GN=NPM1 PE=1 SV=2 - [NPM_HUMAN]	4	8	5	0	0	5.66667	0	>35	not det.
H0YDG7	Serine/threonine-protein phosphatase 2A 65 kDa regulatory subunit A beta isoform (Fragment) OS=Homo sapiens GN=PPP2R1B PE=1 SV=1 - [H0YDG7_HUMAN]	6	6	4	0	0	5.33333	0	>35	not det.
P08133	Annexin A6 OS=Homo sapiens GN=ANXA6 PE=1 SV=3 - [ANXA6_HUMAN]	0	8	7	0	0	5	0	>35	not det.
Q01581	Hydroxymethylglutaryl-CoA synthase, cytoplasmic OS=Homo sapiens GN=HMGCS1 PE=1 SV=2 - [HMCS1_HUMAN]	5	5	5	0	0	5	0	>35	not det.
P40926	Malate dehydrogenase, mitochondrial OS=Homo sapiens GN=MDH2 PE=1 SV=3 - [MDHM_HUMAN]	12	1	2	0	0	5	0	>35	not det.
Q5TFE4	5'-nucleotidase domain-containing protein 1 OS=Homo sapiens GN=NT5DC1 PE=1 SV=1 - [NT5D1_HUMAN]	2	6	6	0	0	4.66667	0	>35	not det.
Q9BT78	COP9 signalosome complex subunit 4 OS=Homo sapiens GN=COPS4 PE=1 SV=1 - [CSN4_HUMAN]	4	6	4	0	0	4.66667	0	>35	not det.
H0YN26	Acidic leucine-rich nuclear phosphoprotein 32 family member A OS=Homo sapiens GN=ANP32A PE=1 SV=1 - [H0YN26_HUMAN]	6	3	5	0	0	4.66667	0	>35	not det.
E9PIR7	Thioredoxin reductase 1, cytoplasmic OS=Homo sapiens GN=TXNRD1 PE=1 SV=1 - [E9PIR7_HUMAN]	4	4	6	0	0	4.66667	0	>35	not det.
Q9Y262	Eukaryotic translation initiation factor 3 subunit L OS=Homo sapiens GN=EIF3L PE=1 SV=1 - [EIF3L_HUMAN]	5	5	4	0	0	4.66667	0	>35	not det.
P25705	ATP synthase subunit alpha, mitochondrial OS=Homo sapiens GN=ATP5A1 PE=1 SV=1 - [ATPA_HUMAN]	4	4	6	0	0	4.66667	0	>35	not det.
Q9BZZ5	Apoptosis inhibitor 5 OS=Homo sapiens GN=API5 PE=1 SV=3 - [API5_HUMAN]	4	6	4	0	0	4.66667	0	>35	not det.
P35606	Coatomer subunit beta' OS=Homo sapiens GN=COPB2 PE=1 SV=2 - [COPB2_HUMAN]	5	5	4	0	0	4.66667	0	>35	not det.
A0A087WUZ3	Spectrin beta chain, non-erythrocytic 1 OS=Homo sapiens GN=SPTBN1 PE=1 SV=1 - [A0A087WUZ3_HUMAN]	7	5	2	0	0	4.66667	0	>35	not det.
Q9Y678	Coatomer subunit gamma-1 OS=Homo sapiens GN=COPG1 PE=1 SV=1 - [COPG1_HUMAN]	4	2	7	0	0	4.33333	0	>35	not det.
P33176	Kinesin-1 heavy chain OS=Homo sapiens GN=KIF5B PE=1 SV=1 - [KINH_HUMAN]	2	7	4	0	0	4.33333	0	>35	not det.
P35520	Cystathionine beta-synthase OS=Homo sapiens GN=CBS PE=1 SV=2 - [CBS_HUMAN]	5	5	3	0	0	4.33333	0	>35	not det.
Q14152	Eukaryotic translation initiation factor 3 subunit A OS=Homo sapiens GN=EIF3A PE=1 SV=1 - [EIF3A_HUMAN]	3	6	4	0	0	4.33333	0	>35	not det.
P51398	28S ribosomal protein S29, mitochondrial OS=Homo sapiens GN=DAP3 PE=1 SV=1 - [RT29_HUMAN]	8	2	2	0	0	4	0	>35	not det.
Q93009	Ubiquitin carboxyl-terminal hydrolase 7 OS=Homo sapiens GN=USP7 PE=1 SV=2 - [UBP7_HUMAN]	3	5	4	0	0	4	0	>35	not det.
P62136	Serine/threonine-protein phosphatase PP1-alpha catalytic subunit OS=Homo sapiens GN=PPP1CA PE=1 SV=1 - [PP1A_HUMAN]	5	5	2	0	0	4	0	>35	not det.
Q6ZVF9	G protein-regulated inducer of neurite outgrowth 3 OS=Homo sapiens GN=GPRIN3 PE=2 SV=2 - [GRIN3_HUMAN]	0	7	4	0	0	3.66667	0	>35	not det.
P51665	26S proteasome non-ATPase regulatory subunit 7 OS=Homo sapiens GN=PSMD7 PE=1 SV=2 - [PSMD7_HUMAN]	3	3	5	0	0	3.66667	0	>35	not det.
P46783	40S ribosomal protein S10 OS=Homo sapiens GN=RPS10 PE=1 SV=1 - [RS10_HUMAN]	4	3	4	0	0	3.66667	0	>35	not det.
E7EMW7	E3 ubiquitin-protein ligase UBR5 OS=Homo sapiens GN=UBR5 PE=1 SV=1 - [E7EMW7_HUMAN]	3	5	3	0	0	3.66667	0	>35	not det.
Q12996	Cleavage stimulation factor subunit 3 OS=Homo sapiens GN=CSTF3 PE=1 SV=1 - [CSTF3_HUMAN]	6	3	2	0	0	3.66667	0	>35	not det.
Q8TD19	Serine/threonine-protein kinase Nek9 OS=Homo sapiens GN=NEK9 PE=1 SV=2 - [NEK9_HUMAN]	2	5	4	0	0	3.66667	0	>35	not det.
Q5T4S7	E3 ubiquitin-protein ligase UBR4 OS=Homo sapiens GN=UBR4 PE=1 SV=1 - [UBR4_HUMAN]	3	4	4	0	0	3.66667	0	>35	not det.
O75083	WD repeat-containing protein 1 OS=Homo sapiens GN=WDR1 PE=1 SV=4 - [WDR1_HUMAN]	2	5	4	0	0	3.66667	0	>35	not det.
Q86Y56	Dynein assembly factor 5, axonemal OS=Homo sapiens GN=DNAAF5 PE=1 SV=4 - [DAAF5_HUMAN]	5	4	2	0	0	3.66667	0	>35	not det.
P04181	Ornithine aminotransferase, mitochondrial OS=Homo sapiens GN=OAT PE=1 SV=1 - [OAT_HUMAN]	8	1	2	0	0	3.66667	0	>35	not det.
Q13428	Treacle protein OS=Homo sapiens GN=TCOF1 PE=1 SV=3 - [TCOF_HUMAN]	3	3	5	0	0	3.66667	0	>35	not det.
H3BNG3	40S ribosomal protein S2 (Fragment) OS=Homo sapiens GN=RPS2 PE=1 SV=1 - [H3BNG3_HUMAN]	3	3	5	0	0	3.66667	0	>35	not det.
P40939	Trifunctional enzyme subunit alpha, mitochondrial OS=Homo sapiens GN=HADHA PE=1 SV=2 - [ECHA_HUMAN]	8	1	2	0	0	3.66667	0	>35	not det.
P00505	Aspartate aminotransferase, mitochondrial OS=Homo sapiens GN=GOT2 PE=1 SV=3 - [AATM_HUMAN]	9	1	1	0	0	3.66667	0	>35	not det.
E7ENL6	Collagen alpha-3(VI) chain OS=Homo sapiens GN=COL6A3 PE=1 SV=2 - [E7ENL6_HUMAN]	4	2	4	0	0	3.33333	0	>35	not det.
P49643	DNA primase large subunit OS=Homo sapiens GN=PRIM2 PE=1 SV=2 - [PRI2_HUMAN]	2	5	3	0	0	3.33333	0	>35	not det.
O75081	Protein CBFA2T3 OS=Homo sapiens GN=CBFA2T3 PE=1 SV=2 - [MTG16_HUMAN]	5	2	3	0	0	3.33333	0	>35	not det.
P26358	DNA (cytosine-5)-methyltransferase 1 OS=Homo sapiens GN=DNMT1 PE=1 SV=2 - [DNMT1_HUMAN]	4	4	2	0	0	3.33333	0	>35	not det.
Q7L1Q6	Basic leucine zipper and W2 domain-containing protein 1 OS=Homo sapiens GN=BZW1 PE=1 SV=1 - [BZW1_HUMAN]	3	1	6	0	0	3.33333	0	>35	not det.
Q9UBF2	Coatomer subunit gamma-2 OS=Homo sapiens GN=COPG2 PE=1 SV=1 - [COPG2_HUMAN]	2	4	4	0	0	3.33333	0	>35	not det.
P02461	Collagen alpha-1(III) chain OS=Homo sapiens GN=COL3A1 PE=1 SV=4 - [CO3A1_HUMAN]	2	6	2	0	0	3.33333	0	>35	not det.
P67775	Serine/threonine-protein phosphatase 2A catalytic subunit alpha isoform OS=Homo sapiens GN=PPP2CA PE=1 SV=1 - [PP2AA_HUMAN]	1	4	4	0	0	3	0	>35	not det.
P49796	Regulator of G-protein signaling 3 OS=Homo sapiens GN=RGS3 PE=1 SV=2 - [RGS3_HUMAN]	4	2	3	0	0	3	0	>35	not det.
P07741	Adenine phosphoribosyltransferase OS=Homo sapiens GN=APRT PE=1 SV=2 - [APT_HUMAN]	3	3	3	0	0	3	0	>35	not det.
Q9H2G2	STE20-like serine/threonine-protein kinase OS=Homo sapiens GN=SLK PE=1 SV=1 - [SLK_HUMAN]	4	2	3	0	0	3	0	>35	not det.
P11766	Alcohol dehydrogenase class-3 OS=Homo sapiens GN=ADH5 PE=1 SV=4 - [ADHX_HUMAN]	4	4	1	0	0	3	0	>35	not det.
P51991	Heterogeneous nuclear ribonucleoprotein A3 OS=Homo sapiens GN=HNRNPA3 PE=1 SV=2 - [ROA3_HUMAN]	3	3	3	0	0	3	0	>35	not det.
Q15020	Squamous cell carcinoma antigen recognized by T-cells 3 OS=Homo sapiens GN=SART3 PE=1 SV=1 - [SART3_HUMAN]	3	3	3	0	0	3	0	>35	not det.
F8VVT9	Arf-GAP with GTPase, ANK repeat and PH domain-containing protein 2 OS=Homo sapiens GN=AGAP2 PE=1 SV=1 - [F8VVT9_HUMAN]	3	3	3	0	0	3	0	>35	not det.
A0A0A0MRM8	Unconventional myosin-VI OS=Homo sapiens GN=MYO6 PE=1 SV=1 - [A0A0A0MRM8_HUMAN]	3	3	3	0	0	3	0	>35	not det.
P48444	Coatomer subunit delta OS=Homo sapiens GN=ARCN1 PE=1 SV=1 - [COPD_HUMAN]	5	2	2	0	0	3	0	>35	not det.
P32969	60S ribosomal protein L9 OS=Homo sapiens GN=RPL9 PE=1 SV=1 - [RL9_HUMAN]	2	5	2	0	0	3	0	>35	not det.
P37802	Transgelin-2 OS=Homo sapiens GN=TAGLN2 PE=1 SV=3 - [TAGL2_HUMAN]	3	4	2	0	0	3	0	>35	not det.
A0A0A0MRF6	A-kinase anchor protein 9 OS=Homo sapiens GN=AKAP9 PE=1 SV=1 - [A0A0A0MRF6_HUMAN]	5	3	1	0	0	3	0	>35	not det.
O14617	AP-3 complex subunit delta-1 OS=Homo sapiens GN=AP3D1 PE=1 SV=1 - [AP3D1_HUMAN]	2	1	6	0	0	3	0	>35	not det.
P05023	Sodium/potassium-transporting ATPase subunit alpha-1 OS=Homo sapiens GN=ATP1A1 PE=1 SV=1 - [AT1A1_HUMAN]	3	1	5	0	0	3	0	>35	not det.
Q9P219	Protein Daple OS=Homo sapiens GN=CCDC88C PE=1 SV=3 - [DAPLE_HUMAN]	1	3	5	0	0	3	0	>35	not det.
O00231	26S proteasome non-ATPase regulatory subunit 11 OS=Homo sapiens GN=PSMD11 PE=1 SV=3 - [PSD11_HUMAN]	3	4	2	0	0	3	0	>35	not det.
P00367	Glutamate dehydrogenase 1, mitochondrial OS=Homo sapiens GN=GLUD1 PE=1 SV=2 - [DHE3_HUMAN]	6	2	1	0	0	3	0	>35	not det.
P30084	Enoyl-CoA hydratase, mitochondrial OS=Homo sapiens GN=ECHS1 PE=1 SV=4 - [ECHM_HUMAN]	4	1	4	0	0	3	0	>35	not det.
Q96JG9	Zinc finger protein 469 OS=Homo sapiens GN=ZNF469 PE=2 SV=3 - [ZN469_HUMAN]	4	3	2	0	0	3	0	>35	not det.
Q9UQ35	Serine/arginine repetitive matrix protein 2 OS=Homo sapiens GN=SRRM2 PE=1 SV=2 - [SRRM2_HUMAN]	3	1	5	0	0	3	0	>35	not det.
A0A0A0MRH2	Ryanodine receptor 1 OS=Homo sapiens GN=RYR1 PE=1 SV=1 - [A0A0A0MRH2_HUMAN]	3	1	5	0	0	3	0	>35	not det.
Q9H361	Polyadenylate-binding protein 3 OS=Homo sapiens GN=PABPC3 PE=1 SV=2 - [PABP3_HUMAN]	1	3	4	0	0	2.66667	0	>35	not det.
Q9C0C9	E2/E3 hybrid ubiquitin-protein ligase UBE2O OS=Homo sapiens GN=UBE2O PE=1 SV=3 - [UBE2O_HUMAN]	1	4	3	0	0	2.66667	0	>35	not det.
P0DMU6	Cancer/testis antigen family 45 member A4 OS=Homo sapiens GN=CT45A4 PE=1 SV=1 - [CT454_HUMAN]	4	3	1	0	0	2.66667	0	>35	not det.
Q06124	Tyrosine-protein phosphatase non-receptor type 11 OS=Homo sapiens GN=PTPN11 PE=1 SV=2 - [PTN11_HUMAN]	3	1	4	0	0	2.66667	0	>35	not det.
P42166	Lamina-associated polypeptide 2, isoform alpha OS=Homo sapiens GN=TMPO PE=1 SV=2 - [LAP2A_HUMAN]	2	3	3	0	0	2.66667	0	>35	not det.
K7ENG2	Splicing factor U2AF 65 kDa subunit OS=Homo sapiens GN=U2AF2 PE=1 SV=1 - [K7ENG2_HUMAN]	3	2	3	0	0	2.66667	0	>35	not det.
Q92688	Acidic leucine-rich nuclear phosphoprotein 32 family member B OS=Homo sapiens GN=ANP32B PE=1 SV=1 - [AN32B_HUMAN]	4	2	2	0	0	2.66667	0	>35	not det.
Q9BV73	Centrosome-associated protein CEP250 OS=Homo sapiens GN=CEP250 PE=1 SV=2 - [CP250_HUMAN]	4	3	1	0	0	2.66667	0	>35	not det.
Q9BV20	Methylthioribose-1-phosphate isomerase OS=Homo sapiens GN=MRI1 PE=1 SV=1 - [MTNA_HUMAN]	4	3	1	0	0	2.66667	0	>35	not det.
P0CW22	40S ribosomal protein S17-like OS=Homo sapiens GN=RPS17L PE=1 SV=1 - [RS17L_HUMAN]	4	4	0	0	0	2.66667	0	>35	not det.
P52732	Kinesin-like protein KIF11 OS=Homo sapiens GN=KIF11 PE=1 SV=2 - [KIF11_HUMAN]	0	3	5	0	0	2.66667	0	>35	not det.
Q9C0B1	Alpha-ketoglutarate-dependent dioxygenase FTO OS=Homo sapiens GN=FTO PE=1 SV=3 - [FTO_HUMAN]	1	3	4	0	0	2.66667	0	>35	not det.
Q14160	Protein scribble homolog OS=Homo sapiens GN=SCRIB PE=1 SV=4 - [SCRIB_HUMAN]	1	3	4	0	0	2.66667	0	>35	not det.
O75155	Cullin-associated NEDD8-dissociated protein 2 OS=Homo sapiens GN=CAND2 PE=1 SV=3 - [CAND2_HUMAN]	2	3	3	0	0	2.66667	0	>35	not det.
P48634	Protein PRRC2A OS=Homo sapiens GN=PRRC2A PE=1 SV=3 - [PRC2A_HUMAN]	4	2	2	0	0	2.66667	0	>35	not det.
A0A087X0P0	Kinesin-like protein OS=Homo sapiens GN=CENPE PE=1 SV=1 - [A0A087X0P0_HUMAN]	2	4	2	0	0	2.66667	0	>35	not det.
Q9C0G0	Zinc finger protein 407 OS=Homo sapiens GN=ZNF407 PE=1 SV=2 - [ZN407_HUMAN]	2	5	1	0	0	2.66667	0	>35	not det.
Q9Y277	Voltage-dependent anion-selective channel protein 3 OS=Homo sapiens GN=VDAC3 PE=1 SV=1 - [VDAC3_HUMAN]	4	2	2	0	0	2.66667	0	>35	not det.
Q8NFW1	Collagen alpha-1(XXII) chain OS=Homo sapiens GN=COL22A1 PE=2 SV=2 - [COMA1_HUMAN]	1	4	3	0	0	2.66667	0	>35	not det.
Q5VW32	BRO1 domain-containing protein BROX OS=Homo sapiens GN=BROX PE=1 SV=1 - [BROX_HUMAN]	3	3	2	0	0	2.66667	0	>35	not det.
Q9BVP2	Guanine nucleotide-binding protein-like 3 OS=Homo sapiens GN=GNL3 PE=1 SV=2 - [GNL3_HUMAN]	4	2	2	0	0	2.66667	0	>35	not det.
O14929	Histone acetyltransferase type B catalytic subunit OS=Homo sapiens GN=HAT1 PE=1 SV=1 - [HAT1_HUMAN]	3	3	2	0	0	2.66667	0	>35	not det.
P48147	Prolyl endopeptidase OS=Homo sapiens GN=PREP PE=1 SV=2 - [PPCE_HUMAN]	3	3	2	0	0	2.66667	0	>35	not det.
Q9Y6G9	Cytoplasmic dynein 1 light intermediate chain 1 OS=Homo sapiens GN=DYNC1LI1 PE=1 SV=3 - [DC1L1_HUMAN]	2	2	4	0	0	2.66667	0	>35	not det.
P22392	Nucleoside diphosphate kinase B OS=Homo sapiens GN=NME2 PE=1 SV=1 - [NDKB_HUMAN]	3	2	3	0	0	2.66667	0	>35	not det.
P08572	Collagen alpha-2(IV) chain OS=Homo sapiens GN=COL4A2 PE=1 SV=4 - [CO4A2_HUMAN]	2	3	2	0	0	2.33333	0	>35	not det.
Q5VYK3	Proteasome-associated protein ECM29 homolog OS=Homo sapiens GN=ECM29 PE=1 SV=2 - [ECM29_HUMAN]	0	1	6	0	0	2.33333	0	>35	not det.
Q99698	Lysosomal-trafficking regulator OS=Homo sapiens GN=LYST PE=1 SV=3 - [LYST_HUMAN]	0	2	5	0	0	2.33333	0	>35	not det.
O95573	Long-chain-fatty-acid--CoA ligase 3 OS=Homo sapiens GN=ACSL3 PE=1 SV=3 - [ACSL3_HUMAN]	0	4	3	0	0	2.33333	0	>35	not det.
Q17RW2	Collagen alpha-1(XXIV) chain OS=Homo sapiens GN=COL24A1 PE=1 SV=2 - [COOA1_HUMAN]	2	2	3	0	0	2.33333	0	>35	not det.
P30044	Peroxiredoxin-5, mitochondrial OS=Homo sapiens GN=PRDX5 PE=1 SV=4 - [PRDX5_HUMAN]	1	3	3	0	0	2.33333	0	>35	not det.
Q13127	RE1-silencing transcription factor OS=Homo sapiens GN=REST PE=1 SV=3 - [REST_HUMAN]	1	3	3	0	0	2.33333	0	>35	not det.
O00154	Cytosolic acyl coenzyme A thioester hydrolase OS=Homo sapiens GN=ACOT7 PE=1 SV=3 - [BACH_HUMAN]	1	4	2	0	0	2.33333	0	>35	not det.
P05386	60S acidic ribosomal protein P1 OS=Homo sapiens GN=RPLP1 PE=1 SV=1 - [RLA1_HUMAN]	2	3	2	0	0	2.33333	0	>35	not det.
O60343	TBC1 domain family member 4 OS=Homo sapiens GN=TBC1D4 PE=1 SV=2 - [TBCD4_HUMAN]	3	2	2	0	0	2.33333	0	>35	not det.
E7EPA1	Phosphoribosyl pyrophosphate synthase-associated protein 2 (Fragment) OS=Homo sapiens GN=PRPSAP2 PE=1 SV=1 - [E7EPA1_HUMAN]	2	3	2	0	0	2.33333	0	>35	not det.
Q7LBC6	Lysine-specific demethylase 3B OS=Homo sapiens GN=KDM3B PE=1 SV=2 - [KDM3B_HUMAN]	5	1	1	0	0	2.33333	0	>35	not det.
Q460N5	Poly [ADP-ribose] polymerase 14 OS=Homo sapiens GN=PARP14 PE=1 SV=3 - [PAR14_HUMAN]	2	4	1	0	0	2.33333	0	>35	not det.
O75592	E3 ubiquitin-protein ligase MYCBP2 OS=Homo sapiens GN=MYCBP2 PE=1 SV=3 - [MYCB2_HUMAN]	2	0	5	0	0	2.33333	0	>35	not det.
P07954	Fumarate hydratase, mitochondrial OS=Homo sapiens GN=FH PE=1 SV=3 - [FUMH_HUMAN]	2	2	3	0	0	2.33333	0	>35	not det.
O00425	Insulin-like growth factor 2 mRNA-binding protein 3 OS=Homo sapiens GN=IGF2BP3 PE=1 SV=2 - [IF2B3_HUMAN]	2	2	3	0	0	2.33333	0	>35	not det.
O00629	Importin subunit alpha-3 OS=Homo sapiens GN=KPNA4 PE=1 SV=1 - [IMA3_HUMAN]	2	2	3	0	0	2.33333	0	>35	not det.
Q9Y6D9	Mitotic spindle assembly checkpoint protein MAD1 OS=Homo sapiens GN=MAD1L1 PE=1 SV=2 - [MD1L1_HUMAN]	3	1	3	0	0	2.33333	0	>35	not det.
E7EM53	Protocadherin-15 OS=Homo sapiens GN=PCDH15 PE=1 SV=2 - [E7EM53_HUMAN]	2	2	3	0	0	2.33333	0	>35	not det.
Q8NI27	THO complex subunit 2 OS=Homo sapiens GN=THOC2 PE=1 SV=2 - [THOC2_HUMAN]	0	5	2	0	0	2.33333	0	>35	not det.
Q9NX46	Poly(ADP-ribose) glycohydrolase ARH3 OS=Homo sapiens GN=ADPRHL2 PE=1 SV=1 - [ARHL2_HUMAN]	1	5	1	0	0	2.33333	0	>35	not det.
O14578	Citron Rho-interacting kinase OS=Homo sapiens GN=CIT PE=1 SV=2 - [CTRO_HUMAN]	4	2	1	0	0	2.33333	0	>35	not det.
Q6F5E8	Leucine-rich repeat-containing protein 16C OS=Homo sapiens GN=RLTPR PE=1 SV=2 - [LR16C_HUMAN]	1	5	1	0	0	2.33333	0	>35	not det.
A0A0B4J2A4	3-ketoacyl-CoA thiolase, mitochondrial OS=Homo sapiens GN=ACAA2 PE=1 SV=1 - [A0A0B4J2A4_HUMAN]	6	0	1	0	0	2.33333	0	>35	not det.
P35527	Keratin, type I cytoskeletal 9 OS=Homo sapiens GN=KRT9 PE=1 SV=3 - [K1C9_HUMAN]	2	2	3	0	0	2.33333	0	>35	not det.
Q96T76	MMS19 nucleotide excision repair protein homolog OS=Homo sapiens GN=MMS19 PE=1 SV=2 - [MMS19_HUMAN]	1	3	3	0	0	2.33333	0	>35	not det.
O14802	DNA-directed RNA polymerase III subunit RPC1 OS=Homo sapiens GN=POLR3A PE=1 SV=2 - [RPC1_HUMAN]	2	2	3	0	0	2.33333	0	>35	not det.
P27824	Calnexin OS=Homo sapiens GN=CANX PE=1 SV=2 - [CALX_HUMAN]	1	4	2	0	0	2.33333	0	>35	not det.
P09622	Dihydrolipoyl dehydrogenase, mitochondrial OS=Homo sapiens GN=DLD PE=1 SV=2 - [DLDH_HUMAN]	5	0	2	0	0	2.33333	0	>35	not det.
Q2LD37	Uncharacterized protein KIAA1109 OS=Homo sapiens GN=KIAA1109 PE=1 SV=2 - [K1109_HUMAN]	1	4	2	0	0	2.33333	0	>35	not det.
P30048	Thioredoxin-dependent peroxide reductase, mitochondrial OS=Homo sapiens GN=PRDX3 PE=1 SV=3 - [PRDX3_HUMAN]	4	1	2	0	0	2.33333	0	>35	not det.
P11177	Pyruvate dehydrogenase E1 component subunit beta, mitochondrial OS=Homo sapiens GN=PDHB PE=1 SV=3 - [ODPB_HUMAN]	4	2	1	0	0	2.33333	0	>35	not det.
A0A087X253	AP-2 complex subunit beta OS=Homo sapiens GN=AP2B1 PE=1 SV=1 - [A0A087X253_HUMAN]	4	2	1	0	0	2.33333	0	>35	not det.
Q68DQ2	Very large A-kinase anchor protein OS=Homo sapiens GN=CRYBG3 PE=1 SV=3 - [CRBG3_HUMAN]	5	2	0	0	0	2.33333	0	>35	not det.
O15371	Eukaryotic translation initiation factor 3 subunit D OS=Homo sapiens GN=EIF3D PE=1 SV=1 - [EIF3D_HUMAN]	3	1	3	0	0	2.33333	0	>35	not det.
Q96P70	Importin-9 OS=Homo sapiens GN=IPO9 PE=1 SV=3 - [IPO9_HUMAN]	1	4	2	0	0	2.33333	0	>35	not det.
O60518	Ran-binding protein 6 OS=Homo sapiens GN=RANBP6 PE=1 SV=2 - [RNBP6_HUMAN]	1	5	1	0	0	2.33333	0	>35	not det.
Q9UMD9	Collagen alpha-1(XVII) chain OS=Homo sapiens GN=COL17A1 PE=1 SV=3 - [COHA1_HUMAN]	6	1	0	0	0	2.33333	0	>35	not det.
Q8TAQ2	SWI/SNF complex subunit SMARCC2 OS=Homo sapiens GN=SMARCC2 PE=1 SV=1 - [SMRC2_HUMAN]	2	2	3	0	0	2.33333	0	>35	not det.
F5GYN4	Ubiquitin thioesterase OTUB1 OS=Homo sapiens GN=OTUB1 PE=1 SV=1 - [F5GYN4_HUMAN]	2	3	2	0	0	2.33333	0	>35	not det.
Q9HCC0	Methylcrotonoyl-CoA carboxylase beta chain, mitochondrial OS=Homo sapiens GN=MCCC2 PE=1 SV=1 - [MCCB_HUMAN]	4	2	1	0	0	2.33333	0	>35	not det.
P31948	Stress-induced-phosphoprotein 1 OS=Homo sapiens GN=STIP1 PE=1 SV=1 - [STIP1_HUMAN]	5	1	1	0	0	2.33333	0	>35	not det.
Q96D46	60S ribosomal export protein NMD3 OS=Homo sapiens GN=NMD3 PE=1 SV=1 - [NMD3_HUMAN]	1	2	3	0	0	2	0	>35	not det.
A0A0C4DGW7	Protein FAM47A OS=Homo sapiens GN=FAM47A PE=4 SV=1 - [A0A0C4DGW7_HUMAN]	2	1	3	0	0	2	0	>35	not det.
Q8N944	APC membrane recruitment protein 3 OS=Homo sapiens GN=AMER3 PE=1 SV=2 - [AMER3_HUMAN]	3	1	2	0	0	2	0	>35	not det.
J3KNU2	F-box only protein 16 OS=Homo sapiens GN=FBXO16 PE=1 SV=1 - [J3KNU2_HUMAN]	1	3	2	0	0	2	0	>35	not det.
Q14573	Inositol 1,4,5-trisphosphate receptor type 3 OS=Homo sapiens GN=ITPR3 PE=1 SV=2 - [ITPR3_HUMAN]	1	4	1	0	0	2	0	>35	not det.
O00267	Transcription elongation factor SPT5 OS=Homo sapiens GN=SUPT5H PE=1 SV=1 - [SPT5H_HUMAN]	2	3	1	0	0	2	0	>35	not det.
O75131	Copine-3 OS=Homo sapiens GN=CPNE3 PE=1 SV=1 - [CPNE3_HUMAN]	0	1	5	0	0	2	0	>35	not det.
Q06190	Serine/threonine-protein phosphatase 2A regulatory subunit B'' subunit alpha OS=Homo sapiens GN=PPP2R3A PE=1 SV=1 - [P2R3A_HUMAN]	1	2	3	0	0	2	0	>35	not det.
Q8TDX9	Polycystic kidney disease protein 1-like 1 OS=Homo sapiens GN=PKD1L1 PE=1 SV=1 - [PK1L1_HUMAN]	2	1	3	0	0	2	0	>35	not det.
P08F94	Fibrocystin OS=Homo sapiens GN=PKHD1 PE=1 SV=1 - [PKHD1_HUMAN]	2	1	3	0	0	2	0	>35	not det.
Q86YV0	RAS protein activator like-3 OS=Homo sapiens GN=RASAL3 PE=1 SV=2 - [RASL3_HUMAN]	1	2	3	0	0	2	0	>35	not det.
M0R2B0	rRNA 2'-O-methyltransferase fibrillarin (Fragment) OS=Homo sapiens GN=FBL PE=1 SV=1 - [M0R2B0_HUMAN]	3	0	3	0	0	2	0	>35	not det.
E5RGU4	Eukaryotic translation initiation factor 3 subunit H (Fragment) OS=Homo sapiens GN=EIF3H PE=1 SV=1 - [E5RGU4_HUMAN]	2	1	3	0	0	2	0	>35	not det.
J3KNA1	Kinesin-like protein OS=Homo sapiens GN=KIF5A PE=1 SV=1 - [J3KNA1_HUMAN]	1	2	3	0	0	2	0	>35	not det.
Q6UB98	Ankyrin repeat domain-containing protein 12 OS=Homo sapiens GN=ANKRD12 PE=1 SV=3 - [ANR12_HUMAN]	3	1	2	0	0	2	0	>35	not det.
P60953	Cell division control protein 42 homolog OS=Homo sapiens GN=CDC42 PE=1 SV=2 - [CDC42_HUMAN]	3	1	2	0	0	2	0	>35	not det.
Q16478	Glutamate receptor ionotropic, kainate 5 OS=Homo sapiens GN=GRIK5 PE=2 SV=2 - [GRIK5_HUMAN]	3	1	2	0	0	2	0	>35	not det.
O60282	Kinesin heavy chain isoform 5C OS=Homo sapiens GN=KIF5C PE=1 SV=1 - [KIF5C_HUMAN]	1	3	2	0	0	2	0	>35	not det.
O76041	Nebulette OS=Homo sapiens GN=NEBL PE=1 SV=1 - [NEBL_HUMAN]	0	4	2	0	0	2	0	>35	not det.
Q92954	Proteoglycan 4 OS=Homo sapiens GN=PRG4 PE=1 SV=2 - [PRG4_HUMAN]	0	4	2	0	0	2	0	>35	not det.
O43309	Zinc finger and SCAN domain-containing protein 12 OS=Homo sapiens GN=ZSCAN12 PE=1 SV=1 - [ZSC12_HUMAN]	2	2	2	0	0	2	0	>35	not det.
J3KNV1	Zinc finger protein 292 OS=Homo sapiens GN=ZNF292 PE=1 SV=1 - [J3KNV1_HUMAN]	1	3	2	0	0	2	0	>35	not det.
E9PF10	Nuclear pore complex protein Nup155 OS=Homo sapiens GN=NUP155 PE=1 SV=1 - [E9PF10_HUMAN]	3	1	2	0	0	2	0	>35	not det.
A0A0A0MTN3	Glutathione S-transferase Mu 3 OS=Homo sapiens GN=GSTM3 PE=1 SV=1 - [A0A0A0MTN3_HUMAN]	2	2	2	0	0	2	0	>35	not det.
P31947	14-3-3 protein sigma OS=Homo sapiens GN=SFN PE=1 SV=1 - [1433S_HUMAN]	2	3	1	0	0	2	0	>35	not det.
Q9BYT8	Neurolysin, mitochondrial OS=Homo sapiens GN=NLN PE=1 SV=1 - [NEUL_HUMAN]	3	2	1	0	0	2	0	>35	not det.
Q9UKL0	REST corepressor 1 OS=Homo sapiens GN=RCOR1 PE=1 SV=1 - [RCOR1_HUMAN]	3	2	1	0	0	2	0	>35	not det.
Q9P2C4	Transmembrane protein 181 OS=Homo sapiens GN=TMEM181 PE=1 SV=2 - [TM181_HUMAN]	4	1	1	0	0	2	0	>35	not det.
H7BXY3	Putative ATP-dependent RNA helicase DHX30 OS=Homo sapiens GN=DHX30 PE=1 SV=1 - [H7BXY3_HUMAN]	4	1	1	0	0	2	0	>35	not det.
P46100	Transcriptional regulator ATRX OS=Homo sapiens GN=ATRX PE=1 SV=5 - [ATRX_HUMAN]	1	5	0	0	0	2	0	>35	not det.
Q02252	Methylmalonate-semialdehyde dehydrogenase [acylating], mitochondrial OS=Homo sapiens GN=ALDH6A1 PE=1 SV=2 - [MMSA_HUMAN]	4	2	0	0	0	2	0	>35	not det.
O14529	Homeobox protein cut-like 2 OS=Homo sapiens GN=CUX2 PE=1 SV=4 - [CUX2_HUMAN]	2	1	3	0	0	2	0	>35	not det.
Q96PY6	Serine/threonine-protein kinase Nek1 OS=Homo sapiens GN=NEK1 PE=1 SV=2 - [NEK1_HUMAN]	2	1	3	0	0	2	0	>35	not det.
P42356	Phosphatidylinositol 4-kinase alpha OS=Homo sapiens GN=PI4KA PE=1 SV=3 - [PI4KA_HUMAN]	1	2	3	0	0	2	0	>35	not det.
Q9BXP5	Serrate RNA effector molecule homolog OS=Homo sapiens GN=SRRT PE=1 SV=1 - [SRRT_HUMAN]	2	1	3	0	0	2	0	>35	not det.
E9PMU7	Poly(U)-binding-splicing factor PUF60 (Fragment) OS=Homo sapiens GN=PUF60 PE=1 SV=1 - [E9PMU7_HUMAN]	2	1	3	0	0	2	0	>35	not det.
M0QY20	Uncharacterized protein (Fragment) OS=Homo sapiens PE=4 SV=1 - [M0QY20_HUMAN]	1	2	3	0	0	2	0	>35	not det.
Q5SRE5	Nucleoporin NUP188 homolog OS=Homo sapiens GN=NUP188 PE=1 SV=1 - [NU188_HUMAN]	3	1	2	0	0	2	0	>35	not det.
C9JD32	60S ribosomal protein L23 (Fragment) OS=Homo sapiens GN=RPL23 PE=1 SV=1 - [C9JD32_HUMAN]	2	2	2	0	0	2	0	>35	not det.
Q13151	Heterogeneous nuclear ribonucleoprotein A0 OS=Homo sapiens GN=HNRNPA0 PE=1 SV=1 - [ROA0_HUMAN]	4	1	1	0	0	2	0	>35	not det.
Q9NYU2	UDP-glucose:glycoprotein glucosyltransferase 1 OS=Homo sapiens GN=UGGT1 PE=1 SV=3 - [UGGG1_HUMAN]	3	2	1	0	0	2	0	>35	not det.
P11172	Uridine 5'-monophosphate synthase OS=Homo sapiens GN=UMPS PE=1 SV=1 - [UMPS_HUMAN]	2	3	1	0	0	2	0	>35	not det.
A0A0B4J2H4	Uncharacterized protein OS=Homo sapiens PE=4 SV=1 - [A0A0B4J2H4_HUMAN]	5	0	1	0	0	2	0	>35	not det.
Q96RW7	Hemicentin-1 OS=Homo sapiens GN=HMCN1 PE=1 SV=2 - [HMCN1_HUMAN]	2	4	0	0	0	2	0	>35	not det.
Q9ULD9	Zinc finger protein 608 OS=Homo sapiens GN=ZNF608 PE=1 SV=4 - [ZN608_HUMAN]	1	1	4	0	0	2	0	>35	not det.
Q86UV5	Ubiquitin carboxyl-terminal hydrolase 48 OS=Homo sapiens GN=USP48 PE=1 SV=1 - [UBP48_HUMAN]	3	0	3	0	0	2	0	>35	not det.
O95782	AP-2 complex subunit alpha-1 OS=Homo sapiens GN=AP2A1 PE=1 SV=3 - [AP2A1_HUMAN]	2	2	2	0	0	2	0	>35	not det.
Q8NEV1	Casein kinase II subunit alpha 3 OS=Homo sapiens GN=CSNK2A3 PE=1 SV=2 - [CSK23_HUMAN]	2	2	2	0	0	2	0	>35	not det.
Q8WUM0	Nuclear pore complex protein Nup133 OS=Homo sapiens GN=NUP133 PE=1 SV=2 - [NU133_HUMAN]	2	3	1	0	0	2	0	>35	not det.
F5GXD8	Stress-induced-phosphoprotein 1 OS=Homo sapiens GN=STIP1 PE=1 SV=1 - [F5GXD8_HUMAN]	4	1	1	0	0	2	0	>35	not det.
Q16643	Drebrin OS=Homo sapiens GN=DBN1 PE=1 SV=4 - [DREB_HUMAN]	1	5	0	0	0	2	0	>35	not det.
P12110	Collagen alpha-2(VI) chain OS=Homo sapiens GN=COL6A2 PE=1 SV=4 - [CO6A2_HUMAN]	1	2	3	0	0	2	0	>35	not det.
Q96RY5	Protein cramped-like OS=Homo sapiens GN=CRAMP1L PE=1 SV=3 - [CRML_HUMAN]	1	3	2	0	0	2	0	>35	not det.
Q9NSI6	Bromodomain and WD repeat-containing protein 1 OS=Homo sapiens GN=BRWD1 PE=1 SV=4 - [BRWD1_HUMAN]	2	3	1	0	0	2	0	>35	not det.
P31930	Cytochrome b-c1 complex subunit 1, mitochondrial OS=Homo sapiens GN=UQCRC1 PE=1 SV=3 - [QCR1_HUMAN]	5	1	0	0	0	2	0	>35	not det.
Q9H6N6	Putative uncharacterized protein MYH16 OS=Homo sapiens GN=MYH16 PE=1 SV=2 - [MYH16_HUMAN]	2	3	1	0	0	2	0	>35	not det.
P25940	Collagen alpha-3(V) chain OS=Homo sapiens GN=COL5A3 PE=1 SV=3 - [CO5A3_HUMAN]	2	3	1	0	0	2	0	>35	not det.
Q13162	Peroxiredoxin-4 OS=Homo sapiens GN=PRDX4 PE=1 SV=1 - [PRDX4_HUMAN]	5	0	1	0	0	2	0	>35	not det.
Q9Y566	SH3 and multiple ankyrin repeat domains protein 1 OS=Homo sapiens GN=SHANK1 PE=1 SV=2 - [SHAN1_HUMAN]	4	1	1	0	0	2	0	>35	not det.
Q86UT6	NLR family member X1 OS=Homo sapiens GN=NLRX1 PE=1 SV=1 - [NLRX1_HUMAN]	0	1	4	0	0	1.66667	0	>35	not det.
Q96QE3	ATPase family AAA domain-containing protein 5 OS=Homo sapiens GN=ATAD5 PE=1 SV=4 - [ATAD5_HUMAN]	2	0	3	0	0	1.66667	0	>35	not det.
P32019	Type II inositol 1,4,5-trisphosphate 5-phosphatase OS=Homo sapiens GN=INPP5B PE=1 SV=4 - [I5P2_HUMAN]	0	2	3	0	0	1.66667	0	>35	not det.
P83859	Orexigenic neuropeptide QRFP OS=Homo sapiens GN=QRFP PE=2 SV=1 - [OX26_HUMAN]	0	2	3	0	0	1.66667	0	>35	not det.
Q96KP4	Cytosolic non-specific dipeptidase OS=Homo sapiens GN=CNDP2 PE=1 SV=2 - [CNDP2_HUMAN]	2	1	2	0	0	1.66667	0	>35	not det.
O60941	Dystrobrevin beta OS=Homo sapiens GN=DTNB PE=1 SV=1 - [DTNB_HUMAN]	2	1	2	0	0	1.66667	0	>35	not det.
A0AUZ9	KAT8 regulatory NSL complex subunit 1-like protein OS=Homo sapiens GN=KANSL1L PE=1 SV=2 - [KAL1L_HUMAN]	3	0	2	0	0	1.66667	0	>35	not det.
Q6NT89	TMF-regulated nuclear protein 1 OS=Homo sapiens GN=TRNP1 PE=2 SV=2 - [TRNP1_HUMAN]	1	2	2	0	0	1.66667	0	>35	not det.
A0A0A0MT09	Nuclear inhibitor of protein phosphatase 1 (Fragment) OS=Homo sapiens GN=PPP1R8 PE=1 SV=1 - [A0A0A0MT09_HUMAN]	1	2	2	0	0	1.66667	0	>35	not det.
E7EPS8	Protein-tyrosine-phosphatase OS=Homo sapiens GN=PTPRM PE=1 SV=2 - [E7EPS8_HUMAN]	0	3	2	0	0	1.66667	0	>35	not det.
Q8IYT3	Coiled-coil domain-containing protein 170 OS=Homo sapiens GN=CCDC170 PE=1 SV=3 - [CC170_HUMAN]	1	3	1	0	0	1.66667	0	>35	not det.
P62820	Ras-related protein Rab-1A OS=Homo sapiens GN=RAB1A PE=1 SV=3 - [RAB1A_HUMAN]	1	3	1	0	0	1.66667	0	>35	not det.
Q92797	Symplekin OS=Homo sapiens GN=SYMPK PE=1 SV=2 - [SYMPK_HUMAN]	2	2	1	0	0	1.66667	0	>35	not det.
Q2NL82	Pre-rRNA-processing protein TSR1 homolog OS=Homo sapiens GN=TSR1 PE=1 SV=1 - [TSR1_HUMAN]	1	3	1	0	0	1.66667	0	>35	not det.
Q9BYB0	SH3 and multiple ankyrin repeat domains protein 3 OS=Homo sapiens GN=SHANK3 PE=1 SV=3 - [SHAN3_HUMAN]	1	3	1	0	0	1.66667	0	>35	not det.
Q8IWY7	Tau-tubulin kinase OS=Homo sapiens PE=1 SV=1 - [Q8IWY7_HUMAN]	2	2	1	0	0	1.66667	0	>35	not det.
A0A0B4J1Y2	Tetratricopeptide repeat protein 21A OS=Homo sapiens GN=TTC21A PE=1 SV=1 - [A0A0B4J1Y2_HUMAN]	1	3	1	0	0	1.66667	0	>35	not det.
P51816	AF4/FMR2 family member 2 OS=Homo sapiens GN=AFF2 PE=1 SV=4 - [AFF2_HUMAN]	2	3	0	0	0	1.66667	0	>35	not det.
Q9H0A0	N-acetyltransferase 10 OS=Homo sapiens GN=NAT10 PE=1 SV=2 - [NAT10_HUMAN]	3	2	0	0	0	1.66667	0	>35	not det.
A6NIT2	Phosphorylase b kinase regulatory subunit alpha, skeletal muscle isoform OS=Homo sapiens GN=PHKA1 PE=1 SV=1 - [A6NIT2_HUMAN]	5	0	0	0	0	1.66667	0	>35	not det.
O95376	E3 ubiquitin-protein ligase ARIH2 OS=Homo sapiens GN=ARIH2 PE=1 SV=1 - [ARI2_HUMAN]	0	1	4	0	0	1.66667	0	>35	not det.
Q6ZS82	Regulator of G-protein signaling 9-binding protein OS=Homo sapiens GN=RGS9BP PE=2 SV=1 - [R9BP_HUMAN]	0	1	4	0	0	1.66667	0	>35	not det.
Q86VQ3	Thioredoxin domain-containing protein 2 OS=Homo sapiens GN=TXNDC2 PE=2 SV=4 - [TXND2_HUMAN]	1	0	4	0	0	1.66667	0	>35	not det.
Q5T7A9	Transducin-like enhancer protein 1 OS=Homo sapiens GN=TLE1 PE=1 SV=2 - [Q5T7A9_HUMAN]	1	0	4	0	0	1.66667	0	>35	not det.
Q96P48	Arf-GAP with Rho-GAP domain, ANK repeat and PH domain-containing protein 1 OS=Homo sapiens GN=ARAP1 PE=1 SV=3 - [ARAP1_HUMAN]	1	1	3	0	0	1.66667	0	>35	not det.
Q15751	Probable E3 ubiquitin-protein ligase HERC1 OS=Homo sapiens GN=HERC1 PE=1 SV=2 - [HERC1_HUMAN]	1	1	3	0	0	1.66667	0	>35	not det.
Q5SYE7	NHS-like protein 1 OS=Homo sapiens GN=NHSL1 PE=1 SV=2 - [NHSL1_HUMAN]	0	2	3	0	0	1.66667	0	>35	not det.
Q9BRS2	Serine/threonine-protein kinase RIO1 OS=Homo sapiens GN=RIOK1 PE=1 SV=2 - [RIOK1_HUMAN]	2	0	3	0	0	1.66667	0	>35	not det.
Q5T321	Neurobeachin OS=Homo sapiens GN=NBEA PE=1 SV=1 - [Q5T321_HUMAN]	2	0	3	0	0	1.66667	0	>35	not det.
H7C5G4	Replication factor C subunit 2 (Fragment) OS=Homo sapiens GN=RFC2 PE=1 SV=1 - [H7C5G4_HUMAN]	0	2	3	0	0	1.66667	0	>35	not det.
Q9UI47	Catenin alpha-3 OS=Homo sapiens GN=CTNNA3 PE=1 SV=2 - [CTNA3_HUMAN]	2	1	2	0	0	1.66667	0	>35	not det.
O00303	Eukaryotic translation initiation factor 3 subunit F OS=Homo sapiens GN=EIF3F PE=1 SV=1 - [EIF3F_HUMAN]	1	2	2	0	0	1.66667	0	>35	not det.
Q9BQ67	Glutamate-rich WD repeat-containing protein 1 OS=Homo sapiens GN=GRWD1 PE=1 SV=1 - [GRWD1_HUMAN]	2	1	2	0	0	1.66667	0	>35	not det.
Q4G0J3	La-related protein 7 OS=Homo sapiens GN=LARP7 PE=1 SV=1 - [LARP7_HUMAN]	0	3	2	0	0	1.66667	0	>35	not det.
Q9H6A9	Pecanex-like protein 3 OS=Homo sapiens GN=PCNXL3 PE=1 SV=2 - [PCX3_HUMAN]	3	0	2	0	0	1.66667	0	>35	not det.
Q4J6C6	Prolyl endopeptidase-like OS=Homo sapiens GN=PREPL PE=1 SV=1 - [PPCEL_HUMAN]	1	2	2	0	0	1.66667	0	>35	not det.
Q08752	Peptidyl-prolyl cis-trans isomerase D OS=Homo sapiens GN=PPID PE=1 SV=3 - [PPID_HUMAN]	0	3	2	0	0	1.66667	0	>35	not det.
Q4VX67	Spermatogenesis-associated protein 31A4 OS=Homo sapiens GN=SPATA31A4 PE=3 SV=2 - [S31A4_HUMAN]	3	0	2	0	0	1.66667	0	>35	not det.
A8MU46	Smoothelin-like protein 1 OS=Homo sapiens GN=SMTNL1 PE=1 SV=1 - [SMTL1_HUMAN]	0	3	2	0	0	1.66667	0	>35	not det.
M0R3F1	Heterogeneous nuclear ribonucleoprotein U-like protein 1 (Fragment) OS=Homo sapiens GN=HNRNPUL1 PE=1 SV=1 - [M0R3F1_HUMAN]	2	1	2	0	0	1.66667	0	>35	not det.
J3KMX5	40S ribosomal protein S13 OS=Homo sapiens GN=RPS13 PE=1 SV=1 - [J3KMX5_HUMAN]	2	1	2	0	0	1.66667	0	>35	not det.
F8VZR8	Iron-sulfur protein NUBPL OS=Homo sapiens GN=NUBPL PE=1 SV=1 - [F8VZR8_HUMAN]	2	1	2	0	0	1.66667	0	>35	not det.
F2Z2V0	Copine-1 (Fragment) OS=Homo sapiens GN=CPNE1 PE=1 SV=1 - [F2Z2V0_HUMAN]	1	2	2	0	0	1.66667	0	>35	not det.
Q8IYY4	Zinc finger protein DZIP1L OS=Homo sapiens GN=DZIP1L PE=1 SV=2 - [DZI1L_HUMAN]	0	4	1	0	0	1.66667	0	>35	not det.
Q8NCW5	NAD(P)H-hydrate epimerase OS=Homo sapiens GN=APOA1BP PE=1 SV=2 - [NNRE_HUMAN]	4	0	1	0	0	1.66667	0	>35	not det.
O94906	Pre-mRNA-processing factor 6 OS=Homo sapiens GN=PRPF6 PE=1 SV=1 - [PRP6_HUMAN]	1	3	1	0	0	1.66667	0	>35	not det.
P46781	40S ribosomal protein S9 OS=Homo sapiens GN=RPS9 PE=1 SV=3 - [RS9_HUMAN]	2	2	1	0	0	1.66667	0	>35	not det.
Q6PI48	Aspartate--tRNA ligase, mitochondrial OS=Homo sapiens GN=DARS2 PE=1 SV=1 - [SYDM_HUMAN]	4	0	1	0	0	1.66667	0	>35	not det.
Q8IWB6	Inactive serine/threonine-protein kinase TEX14 OS=Homo sapiens GN=TEX14 PE=1 SV=2 - [TEX14_HUMAN]	2	2	1	0	0	1.66667	0	>35	not det.
P25325	3-mercaptopyruvate sulfurtransferase OS=Homo sapiens GN=MPST PE=1 SV=3 - [THTM_HUMAN]	3	1	1	0	0	1.66667	0	>35	not det.
Q9UNY4	Transcription termination factor 2 OS=Homo sapiens GN=TTF2 PE=1 SV=2 - [TTF2_HUMAN]	2	2	1	0	0	1.66667	0	>35	not det.
Q05996	Zona pellucida sperm-binding protein 2 OS=Homo sapiens GN=ZP2 PE=2 SV=1 - [ZP2_HUMAN]	3	1	1	0	0	1.66667	0	>35	not det.
C9JL85	Myotrophin OS=Homo sapiens GN=MTPN PE=1 SV=1 - [C9JL85_HUMAN]	2	2	1	0	0	1.66667	0	>35	not det.
A0A0A0MSG5	SPATS2-like protein OS=Homo sapiens GN=SPATS2L PE=1 SV=1 - [A0A0A0MSG5_HUMAN]	1	3	1	0	0	1.66667	0	>35	not det.
E7EM72	Diacylglycerol kinase OS=Homo sapiens GN=DGKI PE=1 SV=1 - [E7EM72_HUMAN]	3	2	0	0	0	1.66667	0	>35	not det.
Q5T6H7	Xaa-Pro aminopeptidase 1 OS=Homo sapiens GN=XPNPEP1 PE=1 SV=1 - [Q5T6H7_HUMAN]	2	3	0	0	0	1.66667	0	>35	not det.
J3KNJ2	Eukaryotic translation initiation factor 3 subunit M (Fragment) OS=Homo sapiens GN=EIF3M PE=1 SV=1 - [J3KNJ2_HUMAN]	3	2	0	0	0	1.66667	0	>35	not det.
M0R372	Very-long-chain enoyl-CoA reductase OS=Homo sapiens GN=TECR PE=4 SV=1 - [M0R372_HUMAN]	2	3	0	0	0	1.66667	0	>35	not det.
Q9UGU0	Transcription factor 20 OS=Homo sapiens GN=TCF20 PE=1 SV=3 - [TCF20_HUMAN]	0	1	4	0	0	1.66667	0	>35	not det.
Q9UPU5	Ubiquitin carboxyl-terminal hydrolase 24 OS=Homo sapiens GN=USP24 PE=1 SV=3 - [UBP24_HUMAN]	0	1	4	0	0	1.66667	0	>35	not det.
M0R2U2	rRNA 2'-O-methyltransferase fibrillarin (Fragment) OS=Homo sapiens GN=FBL PE=1 SV=1 - [M0R2U2_HUMAN]	0	1	4	0	0	1.66667	0	>35	not det.
Q96GA3	Protein LTV1 homolog OS=Homo sapiens GN=LTV1 PE=1 SV=1 - [LTV1_HUMAN]	0	2	3	0	0	1.66667	0	>35	not det.
Q9H6K5	Proline-rich protein 36 OS=Homo sapiens GN=PRR36 PE=2 SV=2 - [PRR36_HUMAN]	0	2	3	0	0	1.66667	0	>35	not det.
P28838	Cytosol aminopeptidase OS=Homo sapiens GN=LAP3 PE=1 SV=3 - [AMPL_HUMAN]	2	1	2	0	0	1.66667	0	>35	not det.
Q96PE2	Rho guanine nucleotide exchange factor 17 OS=Homo sapiens GN=ARHGEF17 PE=1 SV=1 - [ARHGH_HUMAN]	1	2	2	0	0	1.66667	0	>35	not det.
P30046	D-dopachrome decarboxylase OS=Homo sapiens GN=DDT PE=1 SV=3 - [DOPD_HUMAN]	1	2	2	0	0	1.66667	0	>35	not det.
Q6ZRV2	Protein FAM83H OS=Homo sapiens GN=FAM83H PE=1 SV=3 - [FA83H_HUMAN]	2	1	2	0	0	1.66667	0	>35	not det.
Q8NCU4	Coiled-coil domain-containing protein KIAA1407 OS=Homo sapiens GN=KIAA1407 PE=2 SV=1 - [K1407_HUMAN]	1	2	2	0	0	1.66667	0	>35	not det.
P61326	Protein mago nashi homolog OS=Homo sapiens GN=MAGOH PE=1 SV=1 - [MGN_HUMAN]	1	2	2	0	0	1.66667	0	>35	not det.
Q7Z3T8	Zinc finger FYVE domain-containing protein 16 OS=Homo sapiens GN=ZFYVE16 PE=1 SV=3 - [ZFY16_HUMAN]	0	3	2	0	0	1.66667	0	>35	not det.
H0YJ34	Fermitin family homolog 2 (Fragment) OS=Homo sapiens GN=FERMT2 PE=1 SV=1 - [H0YJ34_HUMAN]	1	2	2	0	0	1.66667	0	>35	not det.
H0Y360	AMP deaminase 2 (Fragment) OS=Homo sapiens GN=AMPD2 PE=1 SV=1 - [H0Y360_HUMAN]	1	2	2	0	0	1.66667	0	>35	not det.
A0A0D9SF63	F-box-like/WD repeat-containing protein TBL1XR1 OS=Homo sapiens GN=TBL1XR1 PE=1 SV=1 - [A0A0D9SF63_HUMAN]	2	1	2	0	0	1.66667	0	>35	not det.
Q9P287	BRCA2 and CDKN1A-interacting protein OS=Homo sapiens GN=BCCIP PE=1 SV=1 - [BCCIP_HUMAN]	2	2	1	0	0	1.66667	0	>35	not det.
P48735	Isocitrate dehydrogenase [NADP], mitochondrial OS=Homo sapiens GN=IDH2 PE=1 SV=2 - [IDHP_HUMAN]	3	1	1	0	0	1.66667	0	>35	not det.
P53350	Serine/threonine-protein kinase PLK1 OS=Homo sapiens GN=PLK1 PE=1 SV=1 - [PLK1_HUMAN]	2	2	1	0	0	1.66667	0	>35	not det.
A0A0A0MSD6	Teneurin-3 OS=Homo sapiens GN=TENM3 PE=1 SV=1 - [A0A0A0MSD6_HUMAN]	2	2	1	0	0	1.66667	0	>35	not det.
P05091	Aldehyde dehydrogenase, mitochondrial OS=Homo sapiens GN=ALDH2 PE=1 SV=2 - [ALDH2_HUMAN]	5	0	0	0	0	1.66667	0	>35	not det.
Q9Y232	Chromodomain Y-like protein OS=Homo sapiens GN=CDYL PE=1 SV=2 - [CDYL1_HUMAN]	2	3	0	0	0	1.66667	0	>35	not det.
Q96CX2	BTB/POZ domain-containing protein KCTD12 OS=Homo sapiens GN=KCTD12 PE=1 SV=1 - [KCD12_HUMAN]	5	0	0	0	0	1.66667	0	>35	not det.
P48681	Nestin OS=Homo sapiens GN=NES PE=1 SV=2 - [NEST_HUMAN]	2	3	0	0	0	1.66667	0	>35	not det.
Q04760	Lactoylglutathione lyase OS=Homo sapiens GN=GLO1 PE=1 SV=4 - [LGUL_HUMAN]	0	1	4	0	0	1.66667	0	>35	not det.
Q6IQ22	Ras-related protein Rab-12 OS=Homo sapiens GN=RAB12 PE=1 SV=3 - [RAB12_HUMAN]	1	0	4	0	0	1.66667	0	>35	not det.
F8W7R3	Fanconi anemia group I protein OS=Homo sapiens GN=FANCI PE=1 SV=1 - [F8W7R3_HUMAN]	0	2	3	0	0	1.66667	0	>35	not det.
F5GY05	Constitutive coactivator of peroxisome proliferator-activated receptor gamma OS=Homo sapiens GN=FAM120B PE=1 SV=1 - [F5GY05_HUMAN]	1	1	3	0	0	1.66667	0	>35	not det.
Q9NYQ6	Cadherin EGF LAG seven-pass G-type receptor 1 OS=Homo sapiens GN=CELSR1 PE=1 SV=1 - [CELR1_HUMAN]	1	3	1	0	0	1.66667	0	>35	not det.
Q8TDM6	Disks large homolog 5 OS=Homo sapiens GN=DLG5 PE=1 SV=4 - [DLG5_HUMAN]	1	3	1	0	0	1.66667	0	>35	not det.
Q9Y4W2	Ribosomal biogenesis protein LAS1L OS=Homo sapiens GN=LAS1L PE=1 SV=2 - [LAS1L_HUMAN]	2	2	1	0	0	1.66667	0	>35	not det.
Q96G74	OTU domain-containing protein 5 OS=Homo sapiens GN=OTUD5 PE=1 SV=1 - [OTUD5_HUMAN]	1	3	1	0	0	1.66667	0	>35	not det.
Q12802	A-kinase anchor protein 13 OS=Homo sapiens GN=AKAP13 PE=1 SV=2 - [AKP13_HUMAN]	1	1	3	0	0	1.66667	0	>35	not det.
Q8WXD9	Caskin-1 OS=Homo sapiens GN=CASKIN1 PE=1 SV=1 - [CSKI1_HUMAN]	1	2	2	0	0	1.66667	0	>35	not det.
P43686	26S protease regulatory subunit 6B OS=Homo sapiens GN=PSMC4 PE=1 SV=2 - [PRS6B_HUMAN]	0	3	2	0	0	1.66667	0	>35	not det.
P13804	Electron transfer flavoprotein subunit alpha, mitochondrial OS=Homo sapiens GN=ETFA PE=1 SV=1 - [ETFA_HUMAN]	3	1	1	0	0	1.66667	0	>35	not det.
P23378	Glycine dehydrogenase (decarboxylating), mitochondrial OS=Homo sapiens GN=GLDC PE=1 SV=2 - [GCSP_HUMAN]	3	1	1	0	0	1.66667	0	>35	not det.
O76094	Signal recognition particle subunit SRP72 OS=Homo sapiens GN=SRP72 PE=1 SV=3 - [SRP72_HUMAN]	2	3	0	0	0	1.66667	0	>35	not det.
P30153	Serine/threonine-protein phosphatase 2A 65 kDa regulatory subunit A alpha isoform OS=Homo sapiens GN=PPP2R1A PE=1 SV=4 - [2AAA_HUMAN]	11	21	10	1	0	14	0.5	28	n
A0A0D9SF54	Spectrin alpha chain, non-erythrocytic 1 OS=Homo sapiens GN=SPTAN1 PE=1 SV=1 - [A0A0D9SF54_HUMAN]	15	12	12	1	0	13	0.5	26	n
A6NLN1	Polypyrimidine tract binding protein 1, isoform CRA_b OS=Homo sapiens GN=PTBP1 PE=1 SV=4 - [A6NLN1_HUMAN]	11	10	11	1	0	10.6667	0.5	21.3333	y
P42704	Leucine-rich PPR motif-containing protein, mitochondrial OS=Homo sapiens GN=LRPPRC PE=1 SV=3 - [LPPRC_HUMAN]	23	10	9	2	0	14	1	14	y
A0A087WTT1	Polyadenylate-binding protein OS=Homo sapiens GN=PABPC1 PE=1 SV=1 - [A0A087WTT1_HUMAN]	6	6	7	1	0	6.33333	0.5	12.6667	not det.
O75369	Filamin-B OS=Homo sapiens GN=FLNB PE=1 SV=2 - [FLNB_HUMAN]	6	16	14	2	0	12	1	12	n
P61981	14-3-3 protein gamma OS=Homo sapiens GN=YWHAG PE=1 SV=2 - [1433G_HUMAN]	4	6	8	1	0	6	0.5	12	not det.
P33993	DNA replication licensing factor MCM7 OS=Homo sapiens GN=MCM7 PE=1 SV=4 - [MCM7_HUMAN]	7	4	7	1	0	6	0.5	12	not det.
P23528	Cofilin-1 OS=Homo sapiens GN=CFL1 PE=1 SV=3 - [COF1_HUMAN]	5	6	7	1	0	6	0.5	12	not det.
Q99714	3-hydroxyacyl-CoA dehydrogenase type-2 OS=Homo sapiens GN=HSD17B10 PE=1 SV=3 - [HCD2_HUMAN]	10	2	6	1	0	6	0.5	12	not det.
P17812	CTP synthase 1 OS=Homo sapiens GN=CTPS1 PE=1 SV=2 - [PYRG1_HUMAN]	6	3	8	1	0	5.66667	0.5	11.3333	not det.
Q14008	Cytoskeleton-associated protein 5 OS=Homo sapiens GN=CKAP5 PE=1 SV=3 - [CKAP5_HUMAN]	6	7	4	0	1	5.66667	0.5	11.3333	not det.
Q14166	Tubulin--tyrosine ligase-like protein 12 OS=Homo sapiens GN=TTLL12 PE=1 SV=2 - [TTL12_HUMAN]	6	3	8	1	0	5.66667	0.5	11.3333	not det.
Q92973	Transportin-1 OS=Homo sapiens GN=TNPO1 PE=1 SV=2 - [TNPO1_HUMAN]	4	4	8	1	0	5.33333	0.5	10.6667	not det.
P41250	Glycine--tRNA ligase OS=Homo sapiens GN=GARS PE=1 SV=3 - [SYG_HUMAN]	7	5	4	1	0	5.33333	0.5	10.6667	not det.
Q15084	Protein disulfide-isomerase A6 OS=Homo sapiens GN=PDIA6 PE=1 SV=1 - [PDIA6_HUMAN]	5	3	8	1	0	5.33333	0.5	10.6667	not det.
P42658	Dipeptidyl aminopeptidase-like protein 6 OS=Homo sapiens GN=DPP6 PE=1 SV=2 - [DPP6_HUMAN]	1	7	7	0	1	5	0.5	10	not det.
P00918	Carbonic anhydrase 2 OS=Homo sapiens GN=CA2 PE=1 SV=2 - [CAH2_HUMAN]	5	5	5	1	0	5	0.5	10	not det.
Q6P2E9	Enhancer of mRNA-decapping protein 4 OS=Homo sapiens GN=EDC4 PE=1 SV=1 - [EDC4_HUMAN]	4	4	7	1	0	5	0.5	10	not det.
M0R0F0	40S ribosomal protein S5 (Fragment) OS=Homo sapiens GN=RPS5 PE=1 SV=1 - [M0R0F0_HUMAN]	8	4	3	1	0	5	0.5	10	not det.
P53396	ATP-citrate synthase OS=Homo sapiens GN=ACLY PE=1 SV=3 - [ACLY_HUMAN]	16	22	20	4	0	19.3333	2	9.66667	n
A0A0D9SF53	ATP-dependent RNA helicase DDX3X OS=Homo sapiens GN=DDX3X PE=1 SV=1 - [A0A0D9SF53_HUMAN]	10	8	11	2	0	9.66667	1	9.66667	not det.
P40227	T-complex protein 1 subunit zeta OS=Homo sapiens GN=CCT6A PE=1 SV=3 - [TCPZ_HUMAN]	7	10	12	2	0	9.66667	1	9.66667	not det.
P60891	Ribose-phosphate pyrophosphokinase 1 OS=Homo sapiens GN=PRPS1 PE=1 SV=2 - [PRPS1_HUMAN]	5	3	6	0	1	4.66667	0.5	9.33333	not det.
P05455	Lupus La protein OS=Homo sapiens GN=SSB PE=1 SV=2 - [LA_HUMAN]	2	5	7	1	0	4.66667	0.5	9.33333	not det.
Q9NQG5	Regulation of nuclear pre-mRNA domain-containing protein 1B OS=Homo sapiens GN=RPRD1B PE=1 SV=1 - [RPR1B_HUMAN]	7	4	3	1	0	4.66667	0.5	9.33333	not det.
P02452	Collagen alpha-1(I) chain OS=Homo sapiens GN=COL1A1 PE=1 SV=5 - [CO1A1_HUMAN]	4	5	5	0	1	4.66667	0.5	9.33333	not det.
O15523	ATP-dependent RNA helicase DDX3Y OS=Homo sapiens GN=DDX3Y PE=1 SV=2 - [DDX3Y_HUMAN]	6	2	6	1	0	4.66667	0.5	9.33333	not det.
P27348	14-3-3 protein theta OS=Homo sapiens GN=YWHAQ PE=1 SV=1 - [1433T_HUMAN]	9	8	10	2	0	9	1	9	not det.
O75643	U5 small nuclear ribonucleoprotein 200 kDa helicase OS=Homo sapiens GN=SNRNP200 PE=1 SV=2 - [U520_HUMAN]	12	16	12	3	0	13.3333	1.5	8.88889	n
P09211	Glutathione S-transferase P OS=Homo sapiens GN=GSTP1 PE=1 SV=2 - [GSTP1_HUMAN]	11	8	7	2	0	8.66667	1	8.66667	not det.
Q9BTE3	Mini-chromosome maintenance complex-binding protein OS=Homo sapiens GN=MCMBP PE=1 SV=2 - [MCMBP_HUMAN]	3	7	3	1	0	4.33333	0.5	8.66667	not det.
O14744	Protein arginine N-methyltransferase 5 OS=Homo sapiens GN=PRMT5 PE=1 SV=4 - [ANM5_HUMAN]	5	3	5	1	0	4.33333	0.5	8.66667	not det.
P34897	Serine hydroxymethyltransferase, mitochondrial OS=Homo sapiens GN=SHMT2 PE=1 SV=3 - [GLYM_HUMAN]	4	4	5	1	0	4.33333	0.5	8.66667	not det.
P31689	DnaJ homolog subfamily A member 1 OS=Homo sapiens GN=DNAJA1 PE=1 SV=2 - [DNJA1_HUMAN]	5	2	6	1	0	4.33333	0.5	8.66667	not det.
P35580	Myosin-10 OS=Homo sapiens GN=MYH10 PE=1 SV=3 - [MYH10_HUMAN]	12	17	9	3	0	12.6667	1.5	8.44444	n
A0A087X054	Hypoxia up-regulated protein 1 OS=Homo sapiens GN=HYOU1 PE=1 SV=1 - [A0A087X054_HUMAN]	13	9	3	2	0	8.33333	1	8.33333	not det.
Q13200	26S proteasome non-ATPase regulatory subunit 2 OS=Homo sapiens GN=PSMD2 PE=1 SV=3 - [PSMD2_HUMAN]	7	9	9	1	1	8.33333	1	8.33333	not det.
E9PBS1	Multifunctional protein ADE2 (Fragment) OS=Homo sapiens GN=PAICS PE=1 SV=1 - [E9PBS1_HUMAN]	8	9	8	2	0	8.33333	1	8.33333	not det.
Q00610	Clathrin heavy chain 1 OS=Homo sapiens GN=CLTC PE=1 SV=5 - [CLH1_HUMAN]	20	23	19	4	1	20.6667	2.5	8.26667	y
P00558	Phosphoglycerate kinase 1 OS=Homo sapiens GN=PGK1 PE=1 SV=3 - [PGK1_HUMAN]	12	5	7	1	1	8	1	8	not det.
Q9Y3F4	Serine-threonine kinase receptor-associated protein OS=Homo sapiens GN=STRAP PE=1 SV=1 - [STRAP_HUMAN]	5	4	3	1	0	4	0.5	8	not det.
Q13618	Cullin-3 OS=Homo sapiens GN=CUL3 PE=1 SV=2 - [CUL3_HUMAN]	4	5	3	1	0	4	0.5	8	not det.
Q9Y265	RuvB-like 1 OS=Homo sapiens GN=RUVBL1 PE=1 SV=1 - [RUVB1_HUMAN]	10	13	12	3	0	11.6667	1.5	7.77778	n
P54136	Arginine--tRNA ligase, cytoplasmic OS=Homo sapiens GN=RARS PE=1 SV=2 - [SYRC_HUMAN]	9	5	9	2	0	7.66667	1	7.66667	not det.
Q14974	Importin subunit beta-1 OS=Homo sapiens GN=KPNB1 PE=1 SV=2 - [IMB1_HUMAN]	15	16	14	3	1	15	2	7.5	y
Q16531	DNA damage-binding protein 1 OS=Homo sapiens GN=DDB1 PE=1 SV=1 - [DDB1_HUMAN]	7	7	8	2	0	7.33333	1	7.33333	not det.
O75533	Splicing factor 3B subunit 1 OS=Homo sapiens GN=SF3B1 PE=1 SV=3 - [SF3B1_HUMAN]	8	6	8	2	0	7.33333	1	7.33333	not det.
P13797	Plastin-3 OS=Homo sapiens GN=PLS3 PE=1 SV=4 - [PLST_HUMAN]	11	7	4	2	0	7.33333	1	7.33333	not det.
P78527	DNA-dependent protein kinase catalytic subunit OS=Homo sapiens GN=PRKDC PE=1 SV=3 - [PRKDC_HUMAN]	13	6	3	2	0	7.33333	1	7.33333	not det.
Q99613	Eukaryotic translation initiation factor 3 subunit C OS=Homo sapiens GN=EIF3C PE=1 SV=1 - [EIF3C_HUMAN]	3	6	2	1	0	3.66667	0.5	7.33333	not det.
Q8N163	Cell cycle and apoptosis regulator protein 2 OS=Homo sapiens GN=CCAR2 PE=1 SV=2 - [CCAR2_HUMAN]	3	4	4	1	0	3.66667	0.5	7.33333	not det.
P52701	DNA mismatch repair protein Msh6 OS=Homo sapiens GN=MSH6 PE=1 SV=2 - [MSH6_HUMAN]	2	3	6	1	0	3.66667	0.5	7.33333	not det.
Q13185	Chromobox protein homolog 3 OS=Homo sapiens GN=CBX3 PE=1 SV=4 - [CBX3_HUMAN]	5	2	4	1	0	3.66667	0.5	7.33333	not det.
B1ANR0	Polyadenylate-binding protein OS=Homo sapiens GN=PABPC4 PE=1 SV=1 - [B1ANR0_HUMAN]	4	3	4	1	0	3.66667	0.5	7.33333	not det.
Q8IVF2	Protein AHNAK2 OS=Homo sapiens GN=AHNAK2 PE=1 SV=2 - [AHNK2_HUMAN]	5	3	3	1	0	3.66667	0.5	7.33333	not det.
A0A0A0MTL4	Neuron navigator 2 OS=Homo sapiens GN=NAV2 PE=1 SV=1 - [A0A0A0MTL4_HUMAN]	3	5	3	0	1	3.66667	0.5	7.33333	not det.
J3QT28	Mitotic checkpoint protein BUB3 (Fragment) OS=Homo sapiens GN=BUB3 PE=1 SV=1 - [J3QT28_HUMAN]	5	4	2	1	0	3.66667	0.5	7.33333	not det.
P33991	DNA replication licensing factor MCM4 OS=Homo sapiens GN=MCM4 PE=1 SV=5 - [MCM4_HUMAN]	5	3	3	1	0	3.66667	0.5	7.33333	not det.
Q10567	AP-1 complex subunit beta-1 OS=Homo sapiens GN=AP1B1 PE=1 SV=2 - [AP1B1_HUMAN]	7	2	2	1	0	3.66667	0.5	7.33333	not det.
P53621	Coatomer subunit alpha OS=Homo sapiens GN=COPA PE=1 SV=2 - [COPA_HUMAN]	8	13	11	3	0	10.6667	1.5	7.11111	n
P08758	Annexin A5 OS=Homo sapiens GN=ANXA5 PE=1 SV=2 - [ANXA5_HUMAN]	8	6	7	2	0	7	1	7	not det.
O95373	Importin-7 OS=Homo sapiens GN=IPO7 PE=1 SV=1 - [IPO7_HUMAN]	12	14	15	4	0	13.6667	2	6.83333	n
P05388	60S acidic ribosomal protein P0 OS=Homo sapiens GN=RPLP0 PE=1 SV=1 - [RLA0_HUMAN]	5	11	14	3	0	10	1.5	6.66667	n
E7EX73	Eukaryotic translation initiation factor 4 gamma 1 OS=Homo sapiens GN=EIF4G1 PE=1 SV=1 - [E7EX73_HUMAN]	5	9	6	2	0	6.66667	1	6.66667	not det.
Q7Z6Z7	E3 ubiquitin-protein ligase HUWE1 OS=Homo sapiens GN=HUWE1 PE=1 SV=3 - [HUWE1_HUMAN]	3	11	6	2	0	6.66667	1	6.66667	not det.
P63241	Eukaryotic translation initiation factor 5A-1 OS=Homo sapiens GN=EIF5A PE=1 SV=2 - [IF5A1_HUMAN]	3	9	8	2	0	6.66667	1	6.66667	not det.
Q6V0I7	Protocadherin Fat 4 OS=Homo sapiens GN=FAT4 PE=1 SV=2 - [FAT4_HUMAN]	4	2	4	0	1	3.33333	0.5	6.66667	not det.
P09874	Poly [ADP-ribose] polymerase 1 OS=Homo sapiens GN=PARP1 PE=1 SV=4 - [PARP1_HUMAN]	5	3	2	1	0	3.33333	0.5	6.66667	not det.
E7ETT4	Propionyl-CoA carboxylase beta chain, mitochondrial OS=Homo sapiens GN=PCCB PE=1 SV=1 - [E7ETT4_HUMAN]	2	6	2	1	0	3.33333	0.5	6.66667	not det.
P18754	Regulator of chromosome condensation OS=Homo sapiens GN=RCC1 PE=1 SV=1 - [RCC1_HUMAN]	3	2	5	1	0	3.33333	0.5	6.66667	not det.
B1AHB1	DNA helicase OS=Homo sapiens GN=MCM5 PE=1 SV=1 - [B1AHB1_HUMAN]	5	3	2	1	0	3.33333	0.5	6.66667	not det.
P02462	Collagen alpha-1(IV) chain OS=Homo sapiens GN=COL4A1 PE=1 SV=3 - [CO4A1_HUMAN]	1	5	4	1	0	3.33333	0.5	6.66667	not det.
Q9UHB9	Signal recognition particle subunit SRP68 OS=Homo sapiens GN=SRP68 PE=1 SV=2 - [SRP68_HUMAN]	2	4	4	1	0	3.33333	0.5	6.66667	not det.
H3BPX2	Obscurin OS=Homo sapiens GN=OBSCN PE=1 SV=2 - [H3BPX2_HUMAN]	4	3	3	1	0	3.33333	0.5	6.66667	not det.
Q9P258	Protein RCC2 OS=Homo sapiens GN=RCC2 PE=1 SV=2 - [RCC2_HUMAN]	5	3	2	1	0	3.33333	0.5	6.66667	not det.
Q9P2E9	Ribosome-binding protein 1 OS=Homo sapiens GN=RRBP1 PE=1 SV=4 - [RRBP1_HUMAN]	4	2	4	1	0	3.33333	0.5	6.66667	not det.
P24752	Acetyl-CoA acetyltransferase, mitochondrial OS=Homo sapiens GN=ACAT1 PE=1 SV=1 - [THIL_HUMAN]	5	1	4	1	0	3.33333	0.5	6.66667	not det.
J3KQ32	Obg-like ATPase 1 OS=Homo sapiens GN=OLA1 PE=1 SV=1 - [J3KQ32_HUMAN]	4	2	4	1	0	3.33333	0.5	6.66667	not det.
P02458	Collagen alpha-1(II) chain OS=Homo sapiens GN=COL2A1 PE=1 SV=3 - [CO2A1_HUMAN]	3	5	2	1	0	3.33333	0.5	6.66667	not det.
Q9UMS4	Pre-mRNA-processing factor 19 OS=Homo sapiens GN=PRPF19 PE=1 SV=1 - [PRP19_HUMAN]	6	2	2	1	0	3.33333	0.5	6.66667	not det.
H7BY35	Ryanodine receptor 2 OS=Homo sapiens GN=RYR2 PE=1 SV=2 - [H7BY35_HUMAN]	6	3	1	1	0	3.33333	0.5	6.66667	not det.
P38606	V-type proton ATPase catalytic subunit A OS=Homo sapiens GN=ATP6V1A PE=1 SV=2 - [VATA_HUMAN]	2	4	4	1	0	3.33333	0.5	6.66667	not det.
P61158	Actin-related protein 3 OS=Homo sapiens GN=ACTR3 PE=1 SV=3 - [ARP3_HUMAN]	3	3	4	1	0	3.33333	0.5	6.66667	not det.
P41252	Isoleucine--tRNA ligase, cytoplasmic OS=Homo sapiens GN=IARS PE=1 SV=2 - [SYIC_HUMAN]	13	18	18	5	0	16.3333	2.5	6.53333	n
P49327	Fatty acid synthase OS=Homo sapiens GN=FASN PE=1 SV=3 - [FAS_HUMAN]	38	54	45	11	3	45.6667	7	6.52381	y
B7ZAR1	T-complex protein 1 subunit epsilon OS=Homo sapiens GN=CCT5 PE=1 SV=1 - [B7ZAR1_HUMAN]	7	12	10	3	0	9.66667	1.5	6.44444	not det.
P55060	Exportin-2 OS=Homo sapiens GN=CSE1L PE=1 SV=3 - [XPO2_HUMAN]	17	11	10	3	1	12.6667	2	6.33333	n
P38646	Stress-70 protein, mitochondrial OS=Homo sapiens GN=HSPA9 PE=1 SV=2 - [GRP75_HUMAN]	13	4	2	2	0	6.33333	1	6.33333	not det.
O15067	Phosphoribosylformylglycinamidine synthase OS=Homo sapiens GN=PFAS PE=1 SV=4 - [PUR4_HUMAN]	7	13	8	3	0	9.33333	1.5	6.22222	not det.
Q92616	Translational activator GCN1 OS=Homo sapiens GN=GCN1L1 PE=1 SV=6 - [GCN1L_HUMAN]	7	18	12	4	0	12.3333	2	6.16667	n
P31943	Heterogeneous nuclear ribonucleoprotein H OS=Homo sapiens GN=HNRNPH1 PE=1 SV=4 - [HNRH1_HUMAN]	13	13	11	3	1	12.3333	2	6.16667	y
P31939	Bifunctional purine biosynthesis protein PURH OS=Homo sapiens GN=ATIC PE=1 SV=3 - [PUR9_HUMAN]	17	12	7	2	2	12	2	6	n
P62258	14-3-3 protein epsilon OS=Homo sapiens GN=YWHAE PE=1 SV=1 - [1433E_HUMAN]	9	18	9	3	1	12	2	6	y
P14174	Macrophage migration inhibitory factor OS=Homo sapiens GN=MIF PE=1 SV=4 - [MIF_HUMAN]	15	1	2	1	1	6	1	6	not det.
P12956	X-ray repair cross-complementing protein 6 OS=Homo sapiens GN=XRCC6 PE=1 SV=2 - [XRCC6_HUMAN]	4	5	9	2	0	6	1	6	not det.
P55795	Heterogeneous nuclear ribonucleoprotein H2 OS=Homo sapiens GN=HNRNPH2 PE=1 SV=1 - [HNRH2_HUMAN]	8	5	5	2	0	6	1	6	not det.
Q01518	Adenylyl cyclase-associated protein 1 OS=Homo sapiens GN=CAP1 PE=1 SV=5 - [CAP1_HUMAN]	6	8	4	2	0	6	1	6	not det.
P49411	Elongation factor Tu, mitochondrial OS=Homo sapiens GN=TUFM PE=1 SV=2 - [EFTU_HUMAN]	12	2	4	2	0	6	1	6	not det.
P49591	Serine--tRNA ligase, cytoplasmic OS=Homo sapiens GN=SARS PE=1 SV=3 - [SYSC_HUMAN]	0	5	4	1	0	3	0.5	6	not det.
E7EX21	Collagen alpha-1(XIII) chain OS=Homo sapiens GN=COL13A1 PE=4 SV=1 - [E7EX21_HUMAN]	2	6	1	1	0	3	0.5	6	not det.
P62701	40S ribosomal protein S4, X isoform OS=Homo sapiens GN=RPS4X PE=1 SV=2 - [RS4X_HUMAN]	1	3	5	1	0	3	0.5	6	not det.
Q9P212	1-phosphatidylinositol 4,5-bisphosphate phosphodiesterase epsilon-1 OS=Homo sapiens GN=PLCE1 PE=1 SV=3 - [PLCE1_HUMAN]	2	4	3	1	0	3	0.5	6	not det.
J3QT27	Poly(rC)-binding protein 3 (Fragment) OS=Homo sapiens GN=PCBP3 PE=1 SV=1 - [J3QT27_HUMAN]	3	3	3	1	0	3	0.5	6	not det.
K7EK91	Dynein heavy chain 17, axonemal OS=Homo sapiens GN=DNAH17 PE=1 SV=1 - [K7EK91_HUMAN]	2	4	3	0	1	3	0.5	6	not det.
O15355	Protein phosphatase 1G OS=Homo sapiens GN=PPM1G PE=1 SV=1 - [PPM1G_HUMAN]	4	3	2	1	0	3	0.5	6	not det.
P13535	Myosin-8 OS=Homo sapiens GN=MYH8 PE=1 SV=3 - [MYH8_HUMAN]	2	5	2	1	0	3	0.5	6	not det.
P49792	E3 SUMO-protein ligase RanBP2 OS=Homo sapiens GN=RANBP2 PE=1 SV=2 - [RBP2_HUMAN]	0	7	2	1	0	3	0.5	6	not det.
P61204	ADP-ribosylation factor 3 OS=Homo sapiens GN=ARF3 PE=1 SV=2 - [ARF3_HUMAN]	4	2	3	1	0	3	0.5	6	not det.
Q58FG1	Putative heat shock protein HSP 90-alpha A4 OS=Homo sapiens GN=HSP90AA4P PE=5 SV=1 - [HS904_HUMAN]	2	4	3	1	0	3	0.5	6	not det.
O95996	Adenomatous polyposis coli protein 2 OS=Homo sapiens GN=APC2 PE=1 SV=1 - [APC2_HUMAN]	4	3	2	0	1	3	0.5	6	not det.
Q14204	Cytoplasmic dynein 1 heavy chain 1 OS=Homo sapiens GN=DYNC1H1 PE=1 SV=5 - [DYHC1_HUMAN]	13	28	21	6	1	20.6667	3.5	5.90476	n
O00410	Importin-5 OS=Homo sapiens GN=IPO5 PE=1 SV=4 - [IPO5_HUMAN]	11	12	12	4	0	11.6667	2	5.83333	n
Q96RQ3	Methylcrotonoyl-CoA carboxylase subunit alpha, mitochondrial OS=Homo sapiens GN=MCCC1 PE=1 SV=3 - [MCCA_HUMAN]	10	13	11	3	1	11.3333	2	5.66667	n
P31946	14-3-3 protein beta/alpha OS=Homo sapiens GN=YWHAB PE=1 SV=3 - [1433B_HUMAN]	5	6	6	1	1	5.66667	1	5.66667	not det.
O60506	Heterogeneous nuclear ribonucleoprotein Q OS=Homo sapiens GN=SYNCRIP PE=1 SV=2 - [HNRPQ_HUMAN]	9	10	6	3	0	8.33333	1.5	5.55556	not det.
P11498	Pyruvate carboxylase, mitochondrial OS=Homo sapiens GN=PC PE=1 SV=2 - [PYC_HUMAN]	39	45	41	13	2	41.6667	7.5	5.55556	n
P13489	Ribonuclease inhibitor OS=Homo sapiens GN=RNH1 PE=1 SV=2 - [RINI_HUMAN]	4	9	11	3	0	8	1.5	5.33333	not det.
P52292	Importin subunit alpha-1 OS=Homo sapiens GN=KPNA2 PE=1 SV=1 - [IMA1_HUMAN]	10	6	8	3	0	8	1.5	5.33333	not det.
Q15185	Prostaglandin E synthase 3 OS=Homo sapiens GN=PTGES3 PE=1 SV=1 - [TEBP_HUMAN]	6	3	7	2	0	5.33333	1	5.33333	not det.
Q9Y617	Phosphoserine aminotransferase OS=Homo sapiens GN=PSAT1 PE=1 SV=2 - [SERC_HUMAN]	4	8	4	2	0	5.33333	1	5.33333	not det.
O43593	Lysine-specific demethylase hairless OS=Homo sapiens GN=HR PE=1 SV=5 - [HAIR_HUMAN]	3	2	3	1	0	2.66667	0.5	5.33333	not det.
A0A087WWU8	Tropomyosin alpha-3 chain OS=Homo sapiens GN=TPM3 PE=1 SV=1 - [A0A087WWU8_HUMAN]	2	3	3	1	0	2.66667	0.5	5.33333	not det.
Q8IWI9	MAX gene-associated protein OS=Homo sapiens GN=MGA PE=1 SV=3 - [MGAP_HUMAN]	1	2	5	1	0	2.66667	0.5	5.33333	not det.
Q8N4U5	T-complex protein 11-like protein 2 OS=Homo sapiens GN=TCP11L2 PE=2 SV=1 - [T11L2_HUMAN]	2	2	4	0	1	2.66667	0.5	5.33333	not det.
Q9BPX3	Condensin complex subunit 3 OS=Homo sapiens GN=NCAPG PE=1 SV=1 - [CND3_HUMAN]	2	3	3	1	0	2.66667	0.5	5.33333	not det.
O43776	Asparagine--tRNA ligase, cytoplasmic OS=Homo sapiens GN=NARS PE=1 SV=1 - [SYNC_HUMAN]	2	3	3	1	0	2.66667	0.5	5.33333	not det.
Q9ULI0	ATPase family AAA domain-containing protein 2B OS=Homo sapiens GN=ATAD2B PE=1 SV=3 - [ATD2B_HUMAN]	1	5	2	0	1	2.66667	0.5	5.33333	not det.
Q13347	Eukaryotic translation initiation factor 3 subunit I OS=Homo sapiens GN=EIF3I PE=1 SV=1 - [EIF3I_HUMAN]	3	3	2	1	0	2.66667	0.5	5.33333	not det.
Q15459	Splicing factor 3A subunit 1 OS=Homo sapiens GN=SF3A1 PE=1 SV=1 - [SF3A1_HUMAN]	3	3	2	1	0	2.66667	0.5	5.33333	not det.
Q5TAT6	Collagen alpha-1(XIII) chain OS=Homo sapiens GN=COL13A1 PE=1 SV=1 - [CODA1_HUMAN]	2	5	1	1	0	2.66667	0.5	5.33333	not det.
P30086	Phosphatidylethanolamine-binding protein 1 OS=Homo sapiens GN=PEBP1 PE=1 SV=3 - [PEBP1_HUMAN]	5	2	1	1	0	2.66667	0.5	5.33333	not det.
A2A2M0	Regulation of nuclear pre-mRNA domain-containing protein 1B (Fragment) OS=Homo sapiens GN=RPRD1B PE=1 SV=1 - [A2A2M0_HUMAN]	4	3	1	1	0	2.66667	0.5	5.33333	not det.
P11216	Glycogen phosphorylase, brain form OS=Homo sapiens GN=PYGB PE=1 SV=5 - [PYGB_HUMAN]	1	2	5	1	0	2.66667	0.5	5.33333	not det.
A0A0C4DGQ6	Regulation of nuclear pre-mRNA domain-containing protein 1A OS=Homo sapiens GN=RPRD1A PE=1 SV=1 - [A0A0C4DGQ6_HUMAN]	4	1	3	1	0	2.66667	0.5	5.33333	not det.
Q8N7J2	APC membrane recruitment protein 2 OS=Homo sapiens GN=AMER2 PE=1 SV=3 - [AMER2_HUMAN]	2	4	2	1	0	2.66667	0.5	5.33333	not det.
O75140	DEP domain-containing protein 5 OS=Homo sapiens GN=DEPDC5 PE=1 SV=2 - [DEPD5_HUMAN]	3	4	1	1	0	2.66667	0.5	5.33333	not det.
P28074	Proteasome subunit beta type-5 OS=Homo sapiens GN=PSMB5 PE=1 SV=3 - [PSB5_HUMAN]	2	6	0	1	0	2.66667	0.5	5.33333	not det.
Q9H3U1	Protein unc-45 homolog A OS=Homo sapiens GN=UNC45A PE=1 SV=1 - [UN45A_HUMAN]	2	2	4	1	0	2.66667	0.5	5.33333	not det.
A0A087WXW9	Collagen alpha-1(V) chain OS=Homo sapiens GN=COL5A1 PE=1 SV=1 - [A0A087WXW9_HUMAN]	1	3	4	1	0	2.66667	0.5	5.33333	not det.
E9PQ01	Pre-mRNA cleavage complex 2 protein Pcf11 (Fragment) OS=Homo sapiens GN=PCF11 PE=1 SV=5 - [E9PQ01_HUMAN]	3	3	2	1	0	2.66667	0.5	5.33333	not det.
A0A087WZR9	Pyrroline-5-carboxylate reductase OS=Homo sapiens GN=PYCR2 PE=1 SV=1 - [A0A087WZR9_HUMAN]	4	2	2	1	0	2.66667	0.5	5.33333	not det.
A6NMZ7	Collagen alpha-6(VI) chain OS=Homo sapiens GN=COL6A6 PE=1 SV=2 - [CO6A6_HUMAN]	7	1	0	0	1	2.66667	0.5	5.33333	not det.
B1AKY9	Sodium/potassium-transporting ATPase subunit alpha-2 OS=Homo sapiens GN=ATP1A2 PE=1 SV=1 - [B1AKY9_HUMAN]	4	2	2	0	1	2.66667	0.5	5.33333	not det.
P30837	Aldehyde dehydrogenase X, mitochondrial OS=Homo sapiens GN=ALDH1B1 PE=1 SV=3 - [AL1B1_HUMAN]	5	2	1	1	0	2.66667	0.5	5.33333	not det.
Q9Y2K3	Myosin-15 OS=Homo sapiens GN=MYH15 PE=1 SV=5 - [MYH15_HUMAN]	3	1	4	1	0	2.66667	0.5	5.33333	not det.
A0A0A0MR02	Voltage-dependent anion-selective channel protein 2 (Fragment) OS=Homo sapiens GN=VDAC2 PE=1 SV=1 - [A0A0A0MR02_HUMAN]	3	1	4	1	0	2.66667	0.5	5.33333	not det.
P17858	ATP-dependent 6-phosphofructokinase, liver type OS=Homo sapiens GN=PFKL PE=1 SV=6 - [PFKAL_HUMAN]	3	4	1	1	0	2.66667	0.5	5.33333	not det.
Q9Y490	Talin-1 OS=Homo sapiens GN=TLN1 PE=1 SV=3 - [TLN1_HUMAN]	15	14	25	6	1	18	3.5	5.14286	n
F8W6I7	Heterogeneous nuclear ribonucleoprotein A1 OS=Homo sapiens GN=HNRNPA1 PE=1 SV=2 - [F8W6I7_HUMAN]	8	7	8	2	1	7.66667	1.5	5.11111	not det.
O14654	Insulin receptor substrate 4 OS=Homo sapiens GN=IRS4 PE=1 SV=1 - [IRS4_HUMAN]	3	6	6	2	0	5	1	5	not det.
Q02790	Peptidyl-prolyl cis-trans isomerase FKBP4 OS=Homo sapiens GN=FKBP4 PE=1 SV=3 - [FKBP4_HUMAN]	9	8	5	3	0	7.33333	1.5	4.88889	not det.
P06737	Glycogen phosphorylase, liver form OS=Homo sapiens GN=PYGL PE=1 SV=4 - [PYGL_HUMAN]	9	12	8	4	0	9.66667	2	4.83333	not det.
Q92598	Heat shock protein 105 kDa OS=Homo sapiens GN=HSPH1 PE=1 SV=1 - [HS105_HUMAN]	12	17	14	6	0	14.3333	3	4.77778	n
P35579	Myosin-9 OS=Homo sapiens GN=MYH9 PE=1 SV=4 - [MYH9_HUMAN]	26	33	34	12	1	31	6.5	4.76923	y
Q13263	Transcription intermediary factor 1-beta OS=Homo sapiens GN=TRIM28 PE=1 SV=5 - [TIF1B_HUMAN]	15	19	16	6	1	16.6667	3.5	4.7619	y
P55072	Transitional endoplasmic reticulum ATPase OS=Homo sapiens GN=VCP PE=1 SV=4 - [TERA_HUMAN]	26	22	29	11	0	25.6667	5.5	4.66667	y
P08670	Vimentin OS=Homo sapiens GN=VIM PE=1 SV=4 - [VIME_HUMAN]	10	8	10	4	0	9.33333	2	4.66667	not det.
Q99460	26S proteasome non-ATPase regulatory subunit 1 OS=Homo sapiens GN=PSMD1 PE=1 SV=2 - [PSMD1_HUMAN]	7	5	9	3	0	7	1.5	4.66667	not det.
P49321	Nuclear autoantigenic sperm protein OS=Homo sapiens GN=NASP PE=1 SV=2 - [NASP_HUMAN]	6	8	7	3	0	7	1.5	4.66667	not det.
P49915	GMP synthase [glutamine-hydrolyzing] OS=Homo sapiens GN=GMPS PE=1 SV=1 - [GUAA_HUMAN]	6	6	9	2	1	7	1.5	4.66667	not det.
P56192	Methionine--tRNA ligase, cytoplasmic OS=Homo sapiens GN=MARS PE=1 SV=2 - [SYMC_HUMAN]	7	9	5	3	0	7	1.5	4.66667	not det.
P61221	ATP-binding cassette sub-family E member 1 OS=Homo sapiens GN=ABCE1 PE=1 SV=1 - [ABCE1_HUMAN]	4	4	6	2	0	4.66667	1	4.66667	not det.
O00429	Dynamin-1-like protein OS=Homo sapiens GN=DNM1L PE=1 SV=2 - [DNM1L_HUMAN]	5	4	5	1	1	4.66667	1	4.66667	not det.
Q04917	14-3-3 protein eta OS=Homo sapiens GN=YWHAH PE=1 SV=4 - [1433F_HUMAN]	5	5	4	2	0	4.66667	1	4.66667	not det.
P23921	Ribonucleoside-diphosphate reductase large subunit OS=Homo sapiens GN=RRM1 PE=1 SV=1 - [RIR1_HUMAN]	8	2	4	2	0	4.66667	1	4.66667	not det.
Q2UY09	Collagen alpha-1(XXVIII) chain OS=Homo sapiens GN=COL28A1 PE=2 SV=2 - [COSA1_HUMAN]	1	3	3	1	0	2.33333	0.5	4.66667	not det.
A0A087X2H1	E3 ubiquitin-protein ligase HECTD1 OS=Homo sapiens GN=HECTD1 PE=1 SV=1 - [A0A087X2H1_HUMAN]	3	2	2	1	0	2.33333	0.5	4.66667	not det.
Q9BQ39	ATP-dependent RNA helicase DDX50 OS=Homo sapiens GN=DDX50 PE=1 SV=1 - [DDX50_HUMAN]	1	5	1	0	1	2.33333	0.5	4.66667	not det.
Q15717	ELAV-like protein 1 OS=Homo sapiens GN=ELAVL1 PE=1 SV=2 - [ELAV1_HUMAN]	2	3	2	1	0	2.33333	0.5	4.66667	not det.
Q9UQ80	Proliferation-associated protein 2G4 OS=Homo sapiens GN=PA2G4 PE=1 SV=3 - [PA2G4_HUMAN]	4	1	2	1	0	2.33333	0.5	4.66667	not det.
Q70CQ4	Ubiquitin carboxyl-terminal hydrolase 31 OS=Homo sapiens GN=USP31 PE=2 SV=2 - [UBP31_HUMAN]	1	4	2	1	0	2.33333	0.5	4.66667	not det.
J3QSD7	Cyclin-dependent kinase 12 (Fragment) OS=Homo sapiens GN=CDK12 PE=1 SV=1 - [J3QSD7_HUMAN]	4	1	2	1	0	2.33333	0.5	4.66667	not det.
O43719	HIV Tat-specific factor 1 OS=Homo sapiens GN=HTATSF1 PE=1 SV=1 - [HTSF1_HUMAN]	1	5	1	1	0	2.33333	0.5	4.66667	not det.
E9PJP2	Protein SOGA3 OS=Homo sapiens GN=SOGA3 PE=1 SV=1 - [E9PJP2_HUMAN]	0	2	5	1	0	2.33333	0.5	4.66667	not det.
Q7Z2K8	G protein-regulated inducer of neurite outgrowth 1 OS=Homo sapiens GN=GPRIN1 PE=2 SV=2 - [GRIN1_HUMAN]	3	0	4	0	1	2.33333	0.5	4.66667	not det.
P56537	Eukaryotic translation initiation factor 6 OS=Homo sapiens GN=EIF6 PE=1 SV=1 - [IF6_HUMAN]	2	1	4	1	0	2.33333	0.5	4.66667	not det.
I3L0M5	Putative ATP-dependent RNA helicase DHX33 (Fragment) OS=Homo sapiens GN=DHX33 PE=1 SV=1 - [I3L0M5_HUMAN]	2	2	3	0	1	2.33333	0.5	4.66667	not det.
F5H269	DmX-like protein 1 OS=Homo sapiens GN=DMXL1 PE=1 SV=1 - [F5H269_HUMAN]	2	2	3	1	0	2.33333	0.5	4.66667	not det.
A8MQ02	Afadin OS=Homo sapiens GN=MLLT4 PE=1 SV=2 - [A8MQ02_HUMAN]	3	2	2	1	0	2.33333	0.5	4.66667	not det.
A0A0C4DH09	Protein transport protein Sec16A (Fragment) OS=Homo sapiens GN=SEC16A PE=1 SV=1 - [A0A0C4DH09_HUMAN]	0	5	2	1	0	2.33333	0.5	4.66667	not det.
Q9Y6D5	Brefeldin A-inhibited guanine nucleotide-exchange protein 2 OS=Homo sapiens GN=ARFGEF2 PE=1 SV=3 - [BIG2_HUMAN]	3	3	1	1	0	2.33333	0.5	4.66667	not det.
A6NHR9	Structural maintenance of chromosomes flexible hinge domain-containing protein 1 OS=Homo sapiens GN=SMCHD1 PE=1 SV=2 - [SMHD1_HUMAN]	2	4	1	0	1	2.33333	0.5	4.66667	not det.
F8W8V9	Kinesin-like protein (Fragment) OS=Homo sapiens GN=KIF1A PE=1 SV=1 - [F8W8V9_HUMAN]	3	4	0	1	0	2.33333	0.5	4.66667	not det.
Q8IWJ2	GRIP and coiled-coil domain-containing protein 2 OS=Homo sapiens GN=GCC2 PE=1 SV=4 - [GCC2_HUMAN]	1	2	4	1	0	2.33333	0.5	4.66667	not det.
Q96KK5	Histone H2A type 1-H OS=Homo sapiens GN=HIST1H2AH PE=1 SV=3 - [H2A1H_HUMAN]	3	2	2	1	0	2.33333	0.5	4.66667	not det.
P36551	Oxygen-dependent coproporphyrinogen-III oxidase, mitochondrial OS=Homo sapiens GN=CPOX PE=1 SV=3 - [HEM6_HUMAN]	5	0	2	0	1	2.33333	0.5	4.66667	not det.
F8W6L3	Kinesin light chain 1 OS=Homo sapiens GN=KLC1 PE=1 SV=1 - [F8W6L3_HUMAN]	4	1	2	1	0	2.33333	0.5	4.66667	not det.
Q9UJX3	Anaphase-promoting complex subunit 7 OS=Homo sapiens GN=ANAPC7 PE=1 SV=4 - [APC7_HUMAN]	2	4	1	1	0	2.33333	0.5	4.66667	not det.
E7EST9	Ubiquitin carboxyl-terminal hydrolase OS=Homo sapiens GN=USP19 PE=1 SV=1 - [E7EST9_HUMAN]	1	5	1	1	0	2.33333	0.5	4.66667	not det.
F8W7C6	60S ribosomal protein L10 OS=Homo sapiens GN=RPL10 PE=1 SV=2 - [F8W7C6_HUMAN]	3	2	2	0	1	2.33333	0.5	4.66667	not det.
H0YIS1	Collagen alpha-2(XI) chain OS=Homo sapiens GN=COL11A2 PE=1 SV=1 - [H0YIS1_HUMAN]	1	4	2	0	1	2.33333	0.5	4.66667	not det.
X1WI28	60S ribosomal protein L10 (Fragment) OS=Homo sapiens GN=RPL10 PE=1 SV=4 - [X1WI28_HUMAN]	2	3	2	0	1	2.33333	0.5	4.66667	not det.
P22102	Trifunctional purine biosynthetic protein adenosine-3 OS=Homo sapiens GN=GART PE=1 SV=1 - [PUR2_HUMAN]	17	15	17	7	0	16.3333	3.5	4.66667	n
P34932	Heat shock 70 kDa protein 4 OS=Homo sapiens GN=HSPA4 PE=1 SV=4 - [HSP74_HUMAN]	16	14	5	5	0	11.6667	2.5	4.66667	n
P29401	Transketolase OS=Homo sapiens GN=TKT PE=1 SV=3 - [TKT_HUMAN]	14	23	11	7	0	16	3.5	4.57143	y
P60174	Triosephosphate isomerase OS=Homo sapiens GN=TPI1 PE=1 SV=3 - [TPIS_HUMAN]	15	12	13	6	0	13.3333	3	4.44444	y
P12277	Creatine kinase B-type OS=Homo sapiens GN=CKB PE=1 SV=1 - [KCRB_HUMAN]	16	18	18	7	1	17.3333	4	4.33333	n
P10809	60 kDa heat shock protein, mitochondrial OS=Homo sapiens GN=HSPD1 PE=1 SV=2 - [CH60_HUMAN]	22	17	13	7	1	17.3333	4	4.33333	y
O43390	Heterogeneous nuclear ribonucleoprotein R OS=Homo sapiens GN=HNRNPR PE=1 SV=1 - [HNRPR_HUMAN]	10	9	7	3	1	8.66667	2	4.33333	not det.
Q92900	Regulator of nonsense transcripts 1 OS=Homo sapiens GN=UPF1 PE=1 SV=2 - [RENT1_HUMAN]	6	3	4	2	0	4.33333	1	4.33333	not det.
P50454	Serpin H1 OS=Homo sapiens GN=SERPINH1 PE=1 SV=2 - [SERPH_HUMAN]	5	5	3	2	0	4.33333	1	4.33333	not det.
G3V576	Heterogeneous nuclear ribonucleoproteins C1/C2 OS=Homo sapiens GN=HNRNPC PE=1 SV=1 - [G3V576_HUMAN]	5	5	3	1	1	4.33333	1	4.33333	not det.
E9PKU7	Neutral alpha-glucosidase AB OS=Homo sapiens GN=GANAB PE=1 SV=1 - [E9PKU7_HUMAN]	7	1	5	2	0	4.33333	1	4.33333	not det.
Q13838	Spliceosome RNA helicase DDX39B OS=Homo sapiens GN=DDX39B PE=1 SV=1 - [DX39B_HUMAN]	5	4	4	2	0	4.33333	1	4.33333	not det.
B4DUR8	T-complex protein 1 subunit gamma OS=Homo sapiens GN=CCT3 PE=1 SV=1 - [B4DUR8_HUMAN]	10	11	11	4	1	10.6667	2.5	4.26667	n
P45974	Ubiquitin carboxyl-terminal hydrolase 5 OS=Homo sapiens GN=USP5 PE=1 SV=2 - [UBP5_HUMAN]	7	6	6	3	0	6.33333	1.5	4.22222	not det.
P08243	Asparagine synthetase [glutamine-hydrolyzing] OS=Homo sapiens GN=ASNS PE=1 SV=4 - [ASNS_HUMAN]	8	6	5	3	0	6.33333	1.5	4.22222	not det.
P52209	6-phosphogluconate dehydrogenase, decarboxylating OS=Homo sapiens GN=PGD PE=1 SV=3 - [6PGD_HUMAN]	7	7	5	3	0	6.33333	1.5	4.22222	not det.
Q15029	116 kDa U5 small nuclear ribonucleoprotein component OS=Homo sapiens GN=EFTUD2 PE=1 SV=1 - [U5S1_HUMAN]	9	11	11	5	0	10.3333	2.5	4.13333	n
Q92499	ATP-dependent RNA helicase DDX1 OS=Homo sapiens GN=DDX1 PE=1 SV=2 - [DDX1_HUMAN]	7	7	10	4	0	8	2	4	not det.
P14866	Heterogeneous nuclear ribonucleoprotein L OS=Homo sapiens GN=HNRNPL PE=1 SV=2 - [HNRPL_HUMAN]	7	7	10	3	1	8	2	4	not det.
A0A0A0MTS2	Glucose-6-phosphate isomerase (Fragment) OS=Homo sapiens GN=GPI PE=1 SV=1 - [A0A0A0MTS2_HUMAN]	3	10	5	3	0	6	1.5	4	not det.
P0CZ25	Uncharacterized protein DNAH10OS OS=Homo sapiens GN=DNAH10OS PE=2 SV=1 - [D10OS_HUMAN]	0	4	8	0	2	4	1	4	not det.
P12107	Collagen alpha-1(XI) chain OS=Homo sapiens GN=COL11A1 PE=1 SV=4 - [COBA1_HUMAN]	6	3	3	1	1	4	1	4	not det.
Q86Y22	Collagen alpha-1(XXIII) chain OS=Homo sapiens GN=COL23A1 PE=1 SV=1 - [CONA1_HUMAN]	1	6	5	2	0	4	1	4	not det.
G8JLD5	Dynamin-1-like protein OS=Homo sapiens GN=DNM1L PE=1 SV=1 - [G8JLD5_HUMAN]	5	2	5	1	1	4	1	4	not det.
P12004	Proliferating cell nuclear antigen OS=Homo sapiens GN=PCNA PE=1 SV=1 - [PCNA_HUMAN]	4	4	4	2	0	4	1	4	not det.
O00148	ATP-dependent RNA helicase DDX39A OS=Homo sapiens GN=DDX39A PE=1 SV=2 - [DX39A_HUMAN]	4	4	4	2	0	4	1	4	not det.
Q02878	60S ribosomal protein L6 OS=Homo sapiens GN=RPL6 PE=1 SV=3 - [RL6_HUMAN]	5	4	3	1	1	4	1	4	not det.
Q99798	Aconitate hydratase, mitochondrial OS=Homo sapiens GN=ACO2 PE=1 SV=2 - [ACON_HUMAN]	8	1	3	2	0	4	1	4	not det.
G8JLG1	Structural maintenance of chromosomes protein OS=Homo sapiens GN=SMC1A PE=1 SV=2 - [G8JLG1_HUMAN]	1	1	4	1	0	2	0.5	4	not det.
P16615	Sarcoplasmic/endoplasmic reticulum calcium ATPase 2 OS=Homo sapiens GN=ATP2A2 PE=1 SV=1 - [AT2A2_HUMAN]	1	2	3	1	0	2	0.5	4	not det.
Q9BZ29	Dedicator of cytokinesis protein 9 OS=Homo sapiens GN=DOCK9 PE=1 SV=2 - [DOCK9_HUMAN]	1	2	3	0	1	2	0.5	4	not det.
E7ER77	Endoplasmic reticulum metallopeptidase 1 OS=Homo sapiens GN=ERMP1 PE=1 SV=1 - [E7ER77_HUMAN]	1	2	3	0	1	2	0.5	4	not det.
P10155	60 kDa SS-A/Ro ribonucleoprotein OS=Homo sapiens GN=TROVE2 PE=1 SV=2 - [RO60_HUMAN]	4	0	2	1	0	2	0.5	4	not det.
Q9Y3Z3	Deoxynucleoside triphosphate triphosphohydrolase SAMHD1 OS=Homo sapiens GN=SAMHD1 PE=1 SV=2 - [SAMH1_HUMAN]	2	2	2	1	0	2	0.5	4	not det.
Q5T1M5	FK506-binding protein 15 OS=Homo sapiens GN=FKBP15 PE=1 SV=2 - [FKB15_HUMAN]	3	2	1	1	0	2	0.5	4	not det.
P51610	Host cell factor 1 OS=Homo sapiens GN=HCFC1 PE=1 SV=2 - [HCFC1_HUMAN]	0	0	6	1	0	2	0.5	4	not det.
Q96N67	Dedicator of cytokinesis protein 7 OS=Homo sapiens GN=DOCK7 PE=1 SV=4 - [DOCK7_HUMAN]	1	2	3	1	0	2	0.5	4	not det.
Q86UU1	Pleckstrin homology-like domain family B member 1 OS=Homo sapiens GN=PHLDB1 PE=1 SV=1 - [PHLB1_HUMAN]	2	1	3	0	1	2	0.5	4	not det.
P12081	Histidine--tRNA ligase, cytoplasmic OS=Homo sapiens GN=HARS PE=1 SV=2 - [SYHC_HUMAN]	1	2	3	1	0	2	0.5	4	not det.
P80723	Brain acid soluble protein 1 OS=Homo sapiens GN=BASP1 PE=1 SV=2 - [BASP1_HUMAN]	1	3	2	1	0	2	0.5	4	not det.
Q01813	ATP-dependent 6-phosphofructokinase, platelet type OS=Homo sapiens GN=PFKP PE=1 SV=2 - [PFKAP_HUMAN]	2	2	2	1	0	2	0.5	4	not det.
Q92794	Histone acetyltransferase KAT6A OS=Homo sapiens GN=KAT6A PE=1 SV=2 - [KAT6A_HUMAN]	0	4	2	0	1	2	0.5	4	not det.
Q15008	26S proteasome non-ATPase regulatory subunit 6 OS=Homo sapiens GN=PSMD6 PE=1 SV=1 - [PSMD6_HUMAN]	3	1	2	1	0	2	0.5	4	not det.
H0Y4W2	Transformation/transcription domain-associated protein (Fragment) OS=Homo sapiens GN=TRRAP PE=1 SV=1 - [H0Y4W2_HUMAN]	1	3	2	1	0	2	0.5	4	not det.
F2Z393	Transaldolase OS=Homo sapiens GN=TALDO1 PE=1 SV=1 - [F2Z393_HUMAN]	1	3	2	1	0	2	0.5	4	not det.
P46821	Microtubule-associated protein 1B OS=Homo sapiens GN=MAP1B PE=1 SV=2 - [MAP1B_HUMAN]	0	5	1	1	0	2	0.5	4	not det.
P35658	Nuclear pore complex protein Nup214 OS=Homo sapiens GN=NUP214 PE=1 SV=2 - [NU214_HUMAN]	2	3	1	1	0	2	0.5	4	not det.
D6R9P3	Heterogeneous nuclear ribonucleoprotein A/B OS=Homo sapiens GN=HNRNPAB PE=1 SV=1 - [D6R9P3_HUMAN]	4	1	1	1	0	2	0.5	4	not det.
Q9UHD1	Cysteine and histidine-rich domain-containing protein 1 OS=Homo sapiens GN=CHORDC1 PE=1 SV=2 - [CHRD1_HUMAN]	3	1	2	1	0	2	0.5	4	not det.
P56545	C-terminal-binding protein 2 OS=Homo sapiens GN=CTBP2 PE=1 SV=1 - [CTBP2_HUMAN]	3	1	2	1	0	2	0.5	4	not det.
Q3KQU3	MAP7 domain-containing protein 1 OS=Homo sapiens GN=MAP7D1 PE=1 SV=1 - [MA7D1_HUMAN]	1	3	2	1	0	2	0.5	4	not det.
Q9HC10	Otoferlin OS=Homo sapiens GN=OTOF PE=1 SV=3 - [OTOF_HUMAN]	2	2	2	0	1	2	0.5	4	not det.
Q14993	Collagen alpha-1(XIX) chain OS=Homo sapiens GN=COL19A1 PE=1 SV=3 - [COJA1_HUMAN]	3	2	1	1	0	2	0.5	4	not det.
P23246	Splicing factor, proline- and glutamine-rich OS=Homo sapiens GN=SFPQ PE=1 SV=2 - [SFPQ_HUMAN]	4	1	1	1	0	2	0.5	4	not det.
C9J9K3	40S ribosomal protein SA (Fragment) OS=Homo sapiens GN=RPSA PE=1 SV=5 - [C9J9K3_HUMAN]	2	3	1	1	0	2	0.5	4	not det.
Q9Y5R6	Doublesex- and mab-3-related transcription factor 1 OS=Homo sapiens GN=DMRT1 PE=1 SV=2 - [DMRT1_HUMAN]	1	5	0	1	0	2	0.5	4	not det.
Q9BTT0	Acidic leucine-rich nuclear phosphoprotein 32 family member E OS=Homo sapiens GN=ANP32E PE=1 SV=1 - [AN32E_HUMAN]	0	3	3	1	0	2	0.5	4	not det.
A5YKK6	CCR4-NOT transcription complex subunit 1 OS=Homo sapiens GN=CNOT1 PE=1 SV=2 - [CNOT1_HUMAN]	1	2	3	1	0	2	0.5	4	not det.
Q9NR48	Histone-lysine N-methyltransferase ASH1L OS=Homo sapiens GN=ASH1L PE=1 SV=2 - [ASH1L_HUMAN]	2	2	2	1	0	2	0.5	4	not det.
H0YLD8	SH2 domain-containing adapter protein F OS=Homo sapiens GN=SHF PE=1 SV=1 - [H0YLD8_HUMAN]	2	2	2	1	0	2	0.5	4	not det.
Q7Z7L7	Protein zer-1 homolog OS=Homo sapiens GN=ZER1 PE=1 SV=1 - [ZER1_HUMAN]	3	2	1	0	1	2	0.5	4	not det.
A0A087WX29	TAR DNA-binding protein 43 (Fragment) OS=Homo sapiens GN=TARDBP PE=1 SV=1 - [A0A087WX29_HUMAN]	3	2	1	1	0	2	0.5	4	not det.
E9PDR3	Voltage-dependent N-type calcium channel subunit alpha-1B OS=Homo sapiens GN=CACNA1B PE=1 SV=3 - [E9PDR3_HUMAN]	3	2	1	1	0	2	0.5	4	not det.
Q96PV6	Leukocyte receptor cluster member 8 OS=Homo sapiens GN=LENG8 PE=1 SV=2 - [LENG8_HUMAN]	1	1	4	1	0	2	0.5	4	not det.
Q9ULV4	Coronin-1C OS=Homo sapiens GN=CORO1C PE=1 SV=1 - [COR1C_HUMAN]	2	2	2	1	0	2	0.5	4	not det.
Q8IXQ3	Uncharacterized protein C9orf40 OS=Homo sapiens GN=C9orf40 PE=1 SV=1 - [CI040_HUMAN]	2	4	0	1	0	2	0.5	4	not det.
A0A075B730	Epiplakin OS=Homo sapiens GN=EPPK1 PE=1 SV=2 - [A0A075B730_HUMAN]	2	4	0	0	1	2	0.5	4	not det.
Q02388	Collagen alpha-1(VII) chain OS=Homo sapiens GN=COL7A1 PE=1 SV=2 - [CO7A1_HUMAN]	1	5	0	0	1	2	0.5	4	not det.
P49454	Centromere protein F OS=Homo sapiens GN=CENPF PE=1 SV=2 - [CENPF_HUMAN]	4	1	1	1	0	2	0.5	4	not det.
P50991	T-complex protein 1 subunit delta OS=Homo sapiens GN=CCT4 PE=1 SV=4 - [TCPD_HUMAN]	16	14	17	7	1	15.6667	4	3.91667	y
P17987	T-complex protein 1 subunit alpha OS=Homo sapiens GN=TCP1 PE=1 SV=1 - [TCPA_HUMAN]	14	14	13	7	0	13.6667	3.5	3.90476	y
H0Y4R1	Inosine-5'-monophosphate dehydrogenase 2 (Fragment) OS=Homo sapiens GN=IMPDH2 PE=1 SV=1 - [H0Y4R1_HUMAN]	16	9	10	4	2	11.6667	3	3.88889	y
P14618	Pyruvate kinase PKM OS=Homo sapiens GN=PKM PE=1 SV=4 - [KPYM_HUMAN]	32	31	30	12	4	31	8	3.875	y
Q9Y2L1	Exosome complex exonuclease RRP44 OS=Homo sapiens GN=DIS3 PE=1 SV=2 - [RRP44_HUMAN]	8	6	3	3	0	5.66667	1.5	3.77778	not det.
Q5HY54	Filamin-A OS=Homo sapiens GN=FLNA PE=1 SV=1 - [Q5HY54_HUMAN]	10	28	24	11	0	20.6667	5.5	3.75758	y
Q99832	T-complex protein 1 subunit eta OS=Homo sapiens GN=CCT7 PE=1 SV=2 - [TCPH_HUMAN]	9	20	27	7	3	18.6667	5	3.73333	y
Q9P2P6	StAR-related lipid transfer protein 9 OS=Homo sapiens GN=STARD9 PE=1 SV=3 - [STAR9_HUMAN]	2	4	5	2	0	3.66667	1	3.66667	not det.
Q99615	DnaJ homolog subfamily C member 7 OS=Homo sapiens GN=DNAJC7 PE=1 SV=2 - [DNJC7_HUMAN]	1	5	5	2	0	3.66667	1	3.66667	not det.
P35573	Glycogen debranching enzyme OS=Homo sapiens GN=AGL PE=1 SV=3 - [GDE_HUMAN]	4	2	5	2	0	3.66667	1	3.66667	not det.
P41091	Eukaryotic translation initiation factor 2 subunit 3 OS=Homo sapiens GN=EIF2S3 PE=1 SV=3 - [IF2G_HUMAN]	4	4	3	2	0	3.66667	1	3.66667	not det.
Q5TZA2	Rootletin OS=Homo sapiens GN=CROCC PE=1 SV=1 - [CROCC_HUMAN]	4	3	4	1	1	3.66667	1	3.66667	not det.
Q5CZC0	Fibrous sheath-interacting protein 2 OS=Homo sapiens GN=FSIP2 PE=2 SV=4 - [FSIP2_HUMAN]	8	3	0	2	0	3.66667	1	3.66667	not det.
E7EQR4	Ezrin OS=Homo sapiens GN=EZR PE=1 SV=3 - [E7EQR4_HUMAN]	2	6	3	2	0	3.66667	1	3.66667	not det.
P22314	Ubiquitin-like modifier-activating enzyme 1 OS=Homo sapiens GN=UBA1 PE=1 SV=3 - [UBA1_HUMAN]	32	39	47	18	4	39.3333	11	3.57576	y
P09960	Leukotriene A-4 hydrolase OS=Homo sapiens GN=LTA4H PE=1 SV=2 - [LKHA4_HUMAN]	6	4	6	3	0	5.33333	1.5	3.55556	not det.
Q08J23	tRNA (cytosine(34)-C(5))-methyltransferase OS=Homo sapiens GN=NSUN2 PE=1 SV=2 - [NSUN2_HUMAN]	5	5	6	2	1	5.33333	1.5	3.55556	not det.
E9PD53	Structural maintenance of chromosomes protein OS=Homo sapiens GN=SMC4 PE=1 SV=1 - [E9PD53_HUMAN]	4	6	6	3	0	5.33333	1.5	3.55556	not det.
P49736	DNA replication licensing factor MCM2 OS=Homo sapiens GN=MCM2 PE=1 SV=4 - [MCM2_HUMAN]	5	8	3	3	0	5.33333	1.5	3.55556	not det.
Q9UBT2	SUMO-activating enzyme subunit 2 OS=Homo sapiens GN=UBA2 PE=1 SV=2 - [SAE2_HUMAN]	7	3	6	3	0	5.33333	1.5	3.55556	not det.
E9PKG1	Protein arginine N-methyltransferase 1 OS=Homo sapiens GN=PRMT1 PE=1 SV=1 - [E9PKG1_HUMAN]	7	4	5	3	0	5.33333	1.5	3.55556	not det.
P54886	Delta-1-pyrroline-5-carboxylate synthase OS=Homo sapiens GN=ALDH18A1 PE=1 SV=2 - [P5CS_HUMAN]	10	2	4	2	1	5.33333	1.5	3.55556	not det.
A0A087X0X3	Heterogeneous nuclear ribonucleoprotein M OS=Homo sapiens GN=HNRNPM PE=1 SV=1 - [A0A087X0X3_HUMAN]	7	11	3	4	0	7	2	3.5	not det.
Q8WUM4	Programmed cell death 6-interacting protein OS=Homo sapiens GN=PDCD6IP PE=1 SV=1 - [PDC6I_HUMAN]	6	8	7	4	0	7	2	3.5	not det.
Q13085	Acetyl-CoA carboxylase 1 OS=Homo sapiens GN=ACACA PE=1 SV=2 - [ACACA_HUMAN]	35	63	44	22	6	47.3333	14	3.38095	n
Q86VP6	Cullin-associated NEDD8-dissociated protein 1 OS=Homo sapiens GN=CAND1 PE=1 SV=2 - [CAND1_HUMAN]	12	13	15	8	0	13.3333	4	3.33333	n
P60842	Eukaryotic initiation factor 4A-I OS=Homo sapiens GN=EIF4A1 PE=1 SV=1 - [IF4A1_HUMAN]	11	14	15	6	2	13.3333	4	3.33333	n
P63104	14-3-3 protein zeta/delta OS=Homo sapiens GN=YWHAZ PE=1 SV=1 - [1433Z_HUMAN]	13	15	17	4	5	15	4.5	3.33333	y
P19338	Nucleolin OS=Homo sapiens GN=NCL PE=1 SV=3 - [NUCL_HUMAN]	4	11	10	4	1	8.33333	2.5	3.33333	not det.
Q6P2Q9	Pre-mRNA-processing-splicing factor 8 OS=Homo sapiens GN=PRPF8 PE=1 SV=2 - [PRP8_HUMAN]	6	12	7	5	0	8.33333	2.5	3.33333	not det.
P15880	40S ribosomal protein S2 OS=Homo sapiens GN=RPS2 PE=1 SV=2 - [RS2_HUMAN]	5	6	9	4	0	6.66667	2	3.33333	not det.
P30520	Adenylosuccinate synthetase isozyme 2 OS=Homo sapiens GN=ADSS PE=1 SV=3 - [PURA2_HUMAN]	6	6	3	3	0	5	1.5	3.33333	not det.
P27797	Calreticulin OS=Homo sapiens GN=CALR PE=1 SV=1 - [CALR_HUMAN]	7	3	5	3	0	5	1.5	3.33333	not det.
Q15366	Poly(rC)-binding protein 2 OS=Homo sapiens GN=PCBP2 PE=1 SV=1 - [PCBP2_HUMAN]	6	4	5	3	0	5	1.5	3.33333	not det.
P35749	Myosin-11 OS=Homo sapiens GN=MYH11 PE=1 SV=3 - [MYH11_HUMAN]	6	4	5	3	0	5	1.5	3.33333	not det.
P78347	General transcription factor II-I OS=Homo sapiens GN=GTF2I PE=1 SV=2 - [GTF2I_HUMAN]	3	2	5	2	0	3.33333	1	3.33333	not det.
Q16543	Hsp90 co-chaperone Cdc37 OS=Homo sapiens GN=CDC37 PE=1 SV=1 - [CDC37_HUMAN]	3	4	3	2	0	3.33333	1	3.33333	not det.
P55735	Protein SEC13 homolog OS=Homo sapiens GN=SEC13 PE=1 SV=3 - [SEC13_HUMAN]	3	3	4	1	1	3.33333	1	3.33333	not det.
O95433	Activator of 90 kDa heat shock protein ATPase homolog 1 OS=Homo sapiens GN=AHSA1 PE=1 SV=1 - [AHSA1_HUMAN]	5	2	3	2	0	3.33333	1	3.33333	not det.
D6RAT0	40S ribosomal protein S3a OS=Homo sapiens GN=RPS3A PE=1 SV=1 - [D6RAT0_HUMAN]	2	4	4	2	0	3.33333	1	3.33333	not det.
O95613	Pericentrin OS=Homo sapiens GN=PCNT PE=1 SV=4 - [PCNT_HUMAN]	5	2	3	2	0	3.33333	1	3.33333	not det.
G3V5X4	Nesprin-2 OS=Homo sapiens GN=SYNE2 PE=1 SV=1 - [G3V5X4_HUMAN]	2	6	2	1	1	3.33333	1	3.33333	not det.
A0A075B6F5	Unconventional myosin-XVIIIb OS=Homo sapiens GN=MYO18B PE=1 SV=1 - [A0A075B6F5_HUMAN]	4	4	2	1	1	3.33333	1	3.33333	not det.
Q2NKX8	DNA excision repair protein ERCC-6-like OS=Homo sapiens GN=ERCC6L PE=1 SV=1 - [ERC6L_HUMAN]	1	1	3	0	1	1.66667	0.5	3.33333	not det.
Q13492	Phosphatidylinositol-binding clathrin assembly protein OS=Homo sapiens GN=PICALM PE=1 SV=2 - [PICAL_HUMAN]	0	2	3	0	1	1.66667	0.5	3.33333	not det.
Q0VD83	Apolipoprotein B receptor OS=Homo sapiens GN=APOBR PE=1 SV=2 - [APOBR_HUMAN]	2	1	2	1	0	1.66667	0.5	3.33333	not det.
Q5TB80	Centrosomal protein of 162 kDa OS=Homo sapiens GN=CEP162 PE=1 SV=2 - [CE162_HUMAN]	0	3	2	1	0	1.66667	0.5	3.33333	not det.
Q9UJY4	ADP-ribosylation factor-binding protein GGA2 OS=Homo sapiens GN=GGA2 PE=1 SV=3 - [GGA2_HUMAN]	2	1	2	1	0	1.66667	0.5	3.33333	not det.
Q8N0X7	Spartin OS=Homo sapiens GN=SPG20 PE=1 SV=1 - [SPG20_HUMAN]	1	2	2	1	0	1.66667	0.5	3.33333	not det.
E9PKZ0	60S ribosomal protein L8 (Fragment) OS=Homo sapiens GN=RPL8 PE=1 SV=1 - [E9PKZ0_HUMAN]	2	1	2	1	0	1.66667	0.5	3.33333	not det.
S4R3Q6	Vacuolar protein sorting-associated protein 26A OS=Homo sapiens GN=VPS26A PE=1 SV=1 - [S4R3Q6_HUMAN]	1	2	2	1	0	1.66667	0.5	3.33333	not det.
B1AJY5	26S proteasome non-ATPase regulatory subunit 10 OS=Homo sapiens GN=PSMD10 PE=1 SV=1 - [B1AJY5_HUMAN]	2	1	2	1	0	1.66667	0.5	3.33333	not det.
Q2MD59	B-cell linker protein (Fragment) OS=Homo sapiens GN=BASH PE=1 SV=1 - [Q2MD59_HUMAN]	0	3	2	1	0	1.66667	0.5	3.33333	not det.
Q09472	Histone acetyltransferase p300 OS=Homo sapiens GN=EP300 PE=1 SV=2 - [EP300_HUMAN]	2	1	2	0	1	1.66667	0.5	3.33333	not det.
P35716	Transcription factor SOX-11 OS=Homo sapiens GN=SOX11 PE=1 SV=2 - [SOX11_HUMAN]	1	2	2	0	1	1.66667	0.5	3.33333	not det.
Q86YR7	Probable guanine nucleotide exchange factor MCF2L2 OS=Homo sapiens GN=MCF2L2 PE=2 SV=3 - [MF2L2_HUMAN]	1	3	1	1	0	1.66667	0.5	3.33333	not det.
P22059	Oxysterol-binding protein 1 OS=Homo sapiens GN=OSBP PE=1 SV=1 - [OSBP1_HUMAN]	1	3	1	1	0	1.66667	0.5	3.33333	not det.
Q8N1G2	Cap-specific mRNA (nucleoside-2'-O-)-methyltransferase 1 OS=Homo sapiens GN=CMTR1 PE=1 SV=1 - [CMTR1_HUMAN]	0	4	1	0	1	1.66667	0.5	3.33333	not det.
Q9Y295	Developmentally-regulated GTP-binding protein 1 OS=Homo sapiens GN=DRG1 PE=1 SV=1 - [DRG1_HUMAN]	4	1	0	1	0	1.66667	0.5	3.33333	not det.
M0QZM1	Heterogeneous nuclear ribonucleoprotein M (Fragment) OS=Homo sapiens GN=HNRNPM PE=1 SV=1 - [M0QZM1_HUMAN]	2	3	0	0	1	1.66667	0.5	3.33333	not det.
C9JE98	Nuclear receptor corepressor 2 OS=Homo sapiens GN=NCOR2 PE=1 SV=1 - [C9JE98_HUMAN]	3	2	0	0	1	1.66667	0.5	3.33333	not det.
Q9H553	Alpha-1,3/1,6-mannosyltransferase ALG2 OS=Homo sapiens GN=ALG2 PE=1 SV=1 - [ALG2_HUMAN]	0	1	4	1	0	1.66667	0.5	3.33333	not det.
Q9P2R3	Rabankyrin-5 OS=Homo sapiens GN=ANKFY1 PE=1 SV=2 - [ANFY1_HUMAN]	0	2	3	1	0	1.66667	0.5	3.33333	not det.
O95180	Voltage-dependent T-type calcium channel subunit alpha-1H OS=Homo sapiens GN=CACNA1H PE=1 SV=4 - [CAC1H_HUMAN]	1	2	2	0	1	1.66667	0.5	3.33333	not det.
Q3LXA3	Bifunctional ATP-dependent dihydroxyacetone kinase/FAD-AMP lyase (cyclizing) OS=Homo sapiens GN=DAK PE=1 SV=2 - [DHAK_HUMAN]	2	1	2	1	0	1.66667	0.5	3.33333	not det.
O43432	Eukaryotic translation initiation factor 4 gamma 3 OS=Homo sapiens GN=EIF4G3 PE=1 SV=2 - [IF4G3_HUMAN]	1	2	2	1	0	1.66667	0.5	3.33333	not det.
P62263	40S ribosomal protein S14 OS=Homo sapiens GN=RPS14 PE=1 SV=3 - [RS14_HUMAN]	2	1	2	1	0	1.66667	0.5	3.33333	not det.
O00170	AH receptor-interacting protein OS=Homo sapiens GN=AIP PE=1 SV=2 - [AIP_HUMAN]	3	1	1	1	0	1.66667	0.5	3.33333	not det.
Q9UKA4	A-kinase anchor protein 11 OS=Homo sapiens GN=AKAP11 PE=1 SV=1 - [AKA11_HUMAN]	2	2	1	1	0	1.66667	0.5	3.33333	not det.
Q5T7B8	Kinesin-like protein KIF24 OS=Homo sapiens GN=KIF24 PE=1 SV=2 - [KIF24_HUMAN]	2	2	1	0	1	1.66667	0.5	3.33333	not det.
P30419	Glycylpeptide N-tetradecanoyltransferase 1 OS=Homo sapiens GN=NMT1 PE=1 SV=2 - [NMT1_HUMAN]	3	1	1	1	0	1.66667	0.5	3.33333	not det.
Q7Z494	Nephrocystin-3 OS=Homo sapiens GN=NPHP3 PE=1 SV=1 - [NPHP3_HUMAN]	1	3	1	1	0	1.66667	0.5	3.33333	not det.
P01266	Thyroglobulin OS=Homo sapiens GN=TG PE=1 SV=5 - [THYG_HUMAN]	1	3	1	0	1	1.66667	0.5	3.33333	not det.
Q12888	Tumor suppressor p53-binding protein 1 OS=Homo sapiens GN=TP53BP1 PE=1 SV=2 - [TP53B_HUMAN]	1	3	1	0	1	1.66667	0.5	3.33333	not det.
K7ENH2	Proteasome activator complex subunit 3 (Fragment) OS=Homo sapiens GN=PSME3 PE=1 SV=1 - [K7ENH2_HUMAN]	2	2	1	1	0	1.66667	0.5	3.33333	not det.
E9PF42	von Willebrand factor A domain-containing protein 5B2 OS=Homo sapiens GN=VWA5B2 PE=1 SV=1 - [E9PF42_HUMAN]	3	1	1	1	0	1.66667	0.5	3.33333	not det.
A0A087X1B2	U4/U6.U5 tri-snRNP-associated protein 2 OS=Homo sapiens GN=USP39 PE=1 SV=1 - [A0A087X1B2_HUMAN]	1	3	1	1	0	1.66667	0.5	3.33333	not det.
A0A087WWA3	Kinesin-like protein OS=Homo sapiens GN=KIF1B PE=1 SV=1 - [A0A087WWA3_HUMAN]	0	4	1	1	0	1.66667	0.5	3.33333	not det.
Q96JM2	Zinc finger protein 462 OS=Homo sapiens GN=ZNF462 PE=1 SV=3 - [ZN462_HUMAN]	2	3	0	1	0	1.66667	0.5	3.33333	not det.
Q14789	Golgin subfamily B member 1 OS=Homo sapiens GN=GOLGB1 PE=1 SV=2 - [GOGB1_HUMAN]	0	2	3	1	0	1.66667	0.5	3.33333	not det.
P14868	Aspartate--tRNA ligase, cytoplasmic OS=Homo sapiens GN=DARS PE=1 SV=2 - [SYDC_HUMAN]	2	0	3	1	0	1.66667	0.5	3.33333	not det.
Q2TAM9	Tumor suppressor candidate gene 1 protein OS=Homo sapiens GN=TUSC1 PE=1 SV=3 - [TUSC1_HUMAN]	1	1	3	1	0	1.66667	0.5	3.33333	not det.
E5RI94	TBC1 domain family member 31 OS=Homo sapiens GN=TBC1D31 PE=1 SV=1 - [E5RI94_HUMAN]	0	2	3	0	1	1.66667	0.5	3.33333	not det.
Q99733	Nucleosome assembly protein 1-like 4 OS=Homo sapiens GN=NAP1L4 PE=1 SV=1 - [NP1L4_HUMAN]	1	2	2	1	0	1.66667	0.5	3.33333	not det.
O15078	Centrosomal protein of 290 kDa OS=Homo sapiens GN=CEP290 PE=1 SV=2 - [CE290_HUMAN]	2	2	1	1	0	1.66667	0.5	3.33333	not det.
Q9Y4C1	Lysine-specific demethylase 3A OS=Homo sapiens GN=KDM3A PE=1 SV=4 - [KDM3A_HUMAN]	0	4	1	0	1	1.66667	0.5	3.33333	not det.
P32119	Peroxiredoxin-2 OS=Homo sapiens GN=PRDX2 PE=1 SV=5 - [PRDX2_HUMAN]	4	0	1	1	0	1.66667	0.5	3.33333	not det.
O60292	Signal-induced proliferation-associated 1-like protein 3 OS=Homo sapiens GN=SIPA1L3 PE=1 SV=3 - [SI1L3_HUMAN]	3	1	1	1	0	1.66667	0.5	3.33333	not det.
A0A0C4DGZ0	DNA-directed RNA polymerase OS=Homo sapiens GN=POLR2A PE=1 SV=1 - [A0A0C4DGZ0_HUMAN]	2	2	1	1	0	1.66667	0.5	3.33333	not det.
B4DKY1	Cysteine--tRNA ligase, cytoplasmic OS=Homo sapiens GN=CARS PE=1 SV=1 - [B4DKY1_HUMAN]	3	2	0	1	0	1.66667	0.5	3.33333	not det.
O15018	PDZ domain-containing protein 2 OS=Homo sapiens GN=PDZD2 PE=1 SV=4 - [PDZD2_HUMAN]	1	1	3	0	1	1.66667	0.5	3.33333	not det.
Q9UPV0	Centrosomal protein of 164 kDa OS=Homo sapiens GN=CEP164 PE=1 SV=3 - [CE164_HUMAN]	0	3	2	1	0	1.66667	0.5	3.33333	not det.
Q9BWF3	RNA-binding protein 4 OS=Homo sapiens GN=RBM4 PE=1 SV=1 - [RBM4_HUMAN]	1	2	2	1	0	1.66667	0.5	3.33333	not det.
Q9HBR0	Putative sodium-coupled neutral amino acid transporter 10 OS=Homo sapiens GN=SLC38A10 PE=1 SV=2 - [S38AA_HUMAN]	1	2	2	0	1	1.66667	0.5	3.33333	not det.
E7EW49	CLIP-associating protein 2 OS=Homo sapiens GN=CLASP2 PE=1 SV=1 - [E7EW49_HUMAN]	0	3	2	0	1	1.66667	0.5	3.33333	not det.
Q9NZI8	Insulin-like growth factor 2 mRNA-binding protein 1 OS=Homo sapiens GN=IGF2BP1 PE=1 SV=2 - [IF2B1_HUMAN]	1	3	1	1	0	1.66667	0.5	3.33333	not det.
E7EQV9	Ribosomal protein L15 (Fragment) OS=Homo sapiens GN=RPL15 PE=1 SV=1 - [E7EQV9_HUMAN]	2	2	1	0	1	1.66667	0.5	3.33333	not det.
J3KRE2	Rho GDP-dissociation inhibitor 1 OS=Homo sapiens GN=ARHGDIA PE=1 SV=1 - [J3KRE2_HUMAN]	2	2	1	1	0	1.66667	0.5	3.33333	not det.
F8W689	DNA-binding protein RFX5 (Fragment) OS=Homo sapiens GN=RFX5 PE=1 SV=1 - [F8W689_HUMAN]	3	1	1	0	1	1.66667	0.5	3.33333	not det.
A0A0A0MSW4	Phosphatidylinositol transfer protein beta isoform OS=Homo sapiens GN=PITPNB PE=1 SV=1 - [A0A0A0MSW4_HUMAN]	0	2	3	1	0	1.66667	0.5	3.33333	not det.
Q10570	Cleavage and polyadenylation specificity factor subunit 1 OS=Homo sapiens GN=CPSF1 PE=1 SV=2 - [CPSF1_HUMAN]	1	3	1	1	0	1.66667	0.5	3.33333	not det.
O43896	Kinesin-like protein KIF1C OS=Homo sapiens GN=KIF1C PE=1 SV=3 - [KIF1C_HUMAN]	0	4	1	0	1	1.66667	0.5	3.33333	not det.
Q96N23	Cilia- and flagella-associated protein 54 OS=Homo sapiens GN=CFAP54 PE=2 SV=3 - [CFA54_HUMAN]	2	2	1	0	1	1.66667	0.5	3.33333	not det.
Q9UMN6	Histone-lysine N-methyltransferase 2B OS=Homo sapiens GN=KMT2B PE=1 SV=1 - [KMT2B_HUMAN]	2	3	0	1	0	1.66667	0.5	3.33333	not det.
O00291	Huntingtin-interacting protein 1 OS=Homo sapiens GN=HIP1 PE=1 SV=5 - [HIP1_HUMAN]	2	2	1	1	0	1.66667	0.5	3.33333	not det.
F8W9Z1	Voltage-dependent R-type calcium channel subunit alpha-1E OS=Homo sapiens GN=CACNA1E PE=1 SV=1 - [F8W9Z1_HUMAN]	2	3	0	0	1	1.66667	0.5	3.33333	not det.
Q9NU22	Midasin OS=Homo sapiens GN=MDN1 PE=1 SV=2 - [MDN1_HUMAN]	2	2	1	1	0	1.66667	0.5	3.33333	not det.
F5GWF6	T-complex protein 1 subunit beta OS=Homo sapiens GN=CCT2 PE=1 SV=2 - [F5GWF6_HUMAN]	14	14	16	9	0	14.6667	4.5	3.25926	y
P07814	Bifunctional glutamate/proline--tRNA ligase OS=Homo sapiens GN=EPRS PE=1 SV=5 - [SYEP_HUMAN]	19	33	26	16	0	26	8	3.25	n
P46940	Ras GTPase-activating-like protein IQGAP1 OS=Homo sapiens GN=IQGAP1 PE=1 SV=1 - [IQGA1_HUMAN]	10	11	8	5	1	9.66667	3	3.22222	not det.
P04075	Fructose-bisphosphate aldolase A OS=Homo sapiens GN=ALDOA PE=1 SV=2 - [ALDOA_HUMAN]	12	5	7	5	0	8	2.5	3.2	not det.
E9PFF2	Transketolase OS=Homo sapiens GN=TKT PE=1 SV=1 - [E9PFF2_HUMAN]	6	11	7	5	0	8	2.5	3.2	not det.
E9PLK3	Puromycin-sensitive aminopeptidase OS=Homo sapiens GN=NPEPPS PE=1 SV=1 - [E9PLK3_HUMAN]	12	12	9	7	0	11	3.5	3.14286	n
P26641	Elongation factor 1-gamma OS=Homo sapiens GN=EEF1G PE=1 SV=3 - [EF1G_HUMAN]	9	13	11	6	1	11	3.5	3.14286	y
P06733	Alpha-enolase OS=Homo sapiens GN=ENO1 PE=1 SV=2 - [ENOA_HUMAN]	28	5	9	7	2	14	4.5	3.11111	y
P07237	Protein disulfide-isomerase OS=Homo sapiens GN=P4HB PE=1 SV=3 - [PDIA1_HUMAN]	10	10	8	5	1	9.33333	3	3.11111	not det.
Q9H4A4	Aminopeptidase B OS=Homo sapiens GN=RNPEP PE=1 SV=2 - [AMPB_HUMAN]	6	6	2	3	0	4.66667	1.5	3.11111	not det.
P54577	Tyrosine--tRNA ligase, cytoplasmic OS=Homo sapiens GN=YARS PE=1 SV=4 - [SYYC_HUMAN]	5	4	5	3	0	4.66667	1.5	3.11111	not det.
P62424	60S ribosomal protein L7a OS=Homo sapiens GN=RPL7A PE=1 SV=2 - [RL7A_HUMAN]	4	6	4	3	0	4.66667	1.5	3.11111	not det.
P50395	Rab GDP dissociation inhibitor beta OS=Homo sapiens GN=GDI2 PE=1 SV=2 - [GDIB_HUMAN]	6	7	10	4	1	7.66667	2.5	3.06667	not det.
O00763	Acetyl-CoA carboxylase 2 OS=Homo sapiens GN=ACACB PE=1 SV=3 - [ACACB_HUMAN]	8	16	8	6	1	10.6667	3.5	3.04762	n
Q15393	Splicing factor 3B subunit 3 OS=Homo sapiens GN=SF3B3 PE=1 SV=4 - [SF3B3_HUMAN]	7	10	10	5	1	9	3	3	not det.
P12814	Alpha-actinin-1 OS=Homo sapiens GN=ACTN1 PE=1 SV=2 - [ACTN1_HUMAN]	12	6	9	5	1	9	3	3	not det.
P52294	Importin subunit alpha-5 OS=Homo sapiens GN=KPNA1 PE=1 SV=3 - [IMA5_HUMAN]	4	7	7	4	0	6	2	3	not det.
P11802	Cyclin-dependent kinase 4 OS=Homo sapiens GN=CDK4 PE=1 SV=2 - [CDK4_HUMAN]	5	4	0	2	0	3	1	3	not det.
P50851	Lipopolysaccharide-responsive and beige-like anchor protein OS=Homo sapiens GN=LRBA PE=1 SV=4 - [LRBA_HUMAN]	1	5	3	2	0	3	1	3	not det.
P46777	60S ribosomal protein L5 OS=Homo sapiens GN=RPL5 PE=1 SV=3 - [RL5_HUMAN]	4	3	2	2	0	3	1	3	not det.
A0A087X1X7	Elongation factor 1-delta OS=Homo sapiens GN=EEF1D PE=1 SV=1 - [A0A087X1X7_HUMAN]	3	3	3	1	1	3	1	3	not det.
Q15021	Condensin complex subunit 1 OS=Homo sapiens GN=NCAPD2 PE=1 SV=3 - [CND1_HUMAN]	1	2	6	2	0	3	1	3	not det.
O95425	Supervillin OS=Homo sapiens GN=SVIL PE=1 SV=2 - [SVIL_HUMAN]	4	2	3	1	1	3	1	3	not det.
F5GWX5	Chromodomain-helicase-DNA-binding protein 4 OS=Homo sapiens GN=CHD4 PE=1 SV=1 - [F5GWX5_HUMAN]	1	5	3	2	0	3	1	3	not det.
P38919	Eukaryotic initiation factor 4A-III OS=Homo sapiens GN=EIF4A3 PE=1 SV=4 - [IF4A3_HUMAN]	1	4	4	2	0	3	1	3	not det.
Q8WXH0	Nesprin-2 OS=Homo sapiens GN=SYNE2 PE=1 SV=3 - [SYNE2_HUMAN]	2	5	2	1	1	3	1	3	not det.
Q08211	ATP-dependent RNA helicase A OS=Homo sapiens GN=DHX9 PE=1 SV=4 - [DHX9_HUMAN]	17	19	13	10	1	16.3333	5.5	2.9697	y
Q7KZF4	Staphylococcal nuclease domain-containing protein 1 OS=Homo sapiens GN=SND1 PE=1 SV=1 - [SND1_HUMAN]	11	12	8	5	2	10.3333	3.5	2.95238	n
P53618	Coatomer subunit beta OS=Homo sapiens GN=COPB1 PE=1 SV=3 - [COPB_HUMAN]	5	5	3	3	0	4.33333	1.5	2.88889	not det.
P13645	Keratin, type I cytoskeletal 10 OS=Homo sapiens GN=KRT10 PE=1 SV=6 - [K1C10_HUMAN]	2	7	4	3	0	4.33333	1.5	2.88889	not det.
Q9P2J5	Leucine--tRNA ligase, cytoplasmic OS=Homo sapiens GN=LARS PE=1 SV=2 - [SYLC_HUMAN]	10	11	9	7	0	10	3.5	2.85714	n
A0A087WTP3	Far upstream element-binding protein 2 OS=Homo sapiens GN=KHSRP PE=1 SV=1 - [A0A087WTP3_HUMAN]	17	8	5	7	0	10	3.5	2.85714	n
A0A024R4E5	High density lipoprotein binding protein (Vigilin), isoform CRA_a OS=Homo sapiens GN=HDLBP PE=1 SV=1 - [A0A024R4E5_HUMAN]	5	7	5	4	0	5.66667	2	2.83333	not det.
Q92841	Probable ATP-dependent RNA helicase DDX17 OS=Homo sapiens GN=DDX17 PE=1 SV=2 - [DDX17_HUMAN]	6	11	8	6	0	8.33333	3	2.77778	not det.
P63244	Guanine nucleotide-binding protein subunit beta-2-like 1 OS=Homo sapiens GN=GNB2L1 PE=1 SV=3 - [GBLP_HUMAN]	15	12	10	9	0	12.3333	4.5	2.74074	y
P43243	Matrin-3 OS=Homo sapiens GN=MATR3 PE=1 SV=2 - [MATR3_HUMAN]	13	15	13	8	2	13.6667	5	2.73333	y
Q8WXI7	Mucin-16 OS=Homo sapiens GN=MUC16 PE=1 SV=2 - [MUC16_HUMAN]	6	6	4	0	4	5.33333	2	2.66667	not det.
P62191	26S protease regulatory subunit 4 OS=Homo sapiens GN=PSMC1 PE=1 SV=1 - [PRS4_HUMAN]	4	6	2	3	0	4	1.5	2.66667	not det.
P09104	Gamma-enolase OS=Homo sapiens GN=ENO2 PE=1 SV=3 - [ENOG_HUMAN]	7	1	4	2	1	4	1.5	2.66667	not det.
J3KTA4	Probable ATP-dependent RNA helicase DDX5 OS=Homo sapiens GN=DDX5 PE=1 SV=1 - [J3KTA4_HUMAN]	2	6	4	3	0	4	1.5	2.66667	not det.
Q14C86	GTPase-activating protein and VPS9 domain-containing protein 1 OS=Homo sapiens GN=GAPVD1 PE=1 SV=2 - [GAPD1_HUMAN]	2	1	5	2	0	2.66667	1	2.66667	not det.
D3DQV9	Eukaryotic translation initiation factor 4 gamma 2 (Fragment) OS=Homo sapiens GN=EIF4G2 PE=1 SV=1 - [D3DQV9_HUMAN]	1	2	5	2	0	2.66667	1	2.66667	not det.
D6RGG3	Collagen alpha-1(XII) chain OS=Homo sapiens GN=COL12A1 PE=1 SV=1 - [D6RGG3_HUMAN]	1	6	1	1	1	2.66667	1	2.66667	not det.
K7EJT5	60S ribosomal protein L22 (Fragment) OS=Homo sapiens GN=RPL22 PE=1 SV=1 - [K7EJT5_HUMAN]	1	3	4	2	0	2.66667	1	2.66667	not det.
Q06210	Glutamine--fructose-6-phosphate aminotransferase [isomerizing] 1 OS=Homo sapiens GN=GFPT1 PE=1 SV=3 - [GFPT1_HUMAN]	3	3	2	2	0	2.66667	1	2.66667	not det.
P49721	Proteasome subunit beta type-2 OS=Homo sapiens GN=PSMB2 PE=1 SV=1 - [PSB2_HUMAN]	5	2	1	2	0	2.66667	1	2.66667	not det.
O60610	Protein diaphanous homolog 1 OS=Homo sapiens GN=DIAPH1 PE=1 SV=2 - [DIAP1_HUMAN]	2	3	3	2	0	2.66667	1	2.66667	not det.
Q9Y623	Myosin-4 OS=Homo sapiens GN=MYH4 PE=1 SV=2 - [MYH4_HUMAN]	3	2	3	2	0	2.66667	1	2.66667	not det.
Q9Y6V0	Protein piccolo OS=Homo sapiens GN=PCLO PE=1 SV=4 - [PCLO_HUMAN]	2	3	3	0	2	2.66667	1	2.66667	not det.
Q9Y266	Nuclear migration protein nudC OS=Homo sapiens GN=NUDC PE=1 SV=1 - [NUDC_HUMAN]	4	2	2	2	0	2.66667	1	2.66667	not det.
P26373	60S ribosomal protein L13 OS=Homo sapiens GN=RPL13 PE=1 SV=4 - [RL13_HUMAN]	5	1	2	2	0	2.66667	1	2.66667	not det.
Q8TCG1	Protein CIP2A OS=Homo sapiens GN=KIAA1524 PE=1 SV=2 - [CIP2A_HUMAN]	3	0	5	2	0	2.66667	1	2.66667	not det.
Q92878	DNA repair protein RAD50 OS=Homo sapiens GN=RAD50 PE=1 SV=1 - [RAD50_HUMAN]	1	4	3	1	1	2.66667	1	2.66667	not det.
B7Z9I1	Medium-chain-specific acyl-CoA dehydrogenase, mitochondrial OS=Homo sapiens GN=ACADM PE=1 SV=1 - [B7Z9I1_HUMAN]	1	4	3	2	0	2.66667	1	2.66667	not det.
Q15149	Plectin OS=Homo sapiens GN=PLEC PE=1 SV=3 - [PLEC_HUMAN]	4	3	1	1	1	2.66667	1	2.66667	not det.
P14625	Endoplasmin OS=Homo sapiens GN=HSP90B1 PE=1 SV=1 - [ENPL_HUMAN]	9	11	11	6	2	10.3333	4	2.58333	y
P05165	Propionyl-CoA carboxylase alpha chain, mitochondrial OS=Homo sapiens GN=PCCA PE=1 SV=4 - [PCCA_HUMAN]	29	25	22	19	1	25.3333	10	2.53333	n
P36578	60S ribosomal protein L4 OS=Homo sapiens GN=RPL4 PE=1 SV=5 - [RL4_HUMAN]	10	3	6	3	2	6.33333	2.5	2.53333	not det.
H3BQN4	Fructose-bisphosphate aldolase OS=Homo sapiens GN=ALDOA PE=1 SV=1 - [H3BQN4_HUMAN]	9	4	6	5	0	6.33333	2.5	2.53333	not det.
A0A0A0MTS7	Titin OS=Homo sapiens GN=TTN PE=1 SV=1 - [A0A0A0MTS7_HUMAN]	12	16	2	6	2	10	4	2.5	n
Q14697	Neutral alpha-glucosidase AB OS=Homo sapiens GN=GANAB PE=1 SV=3 - [GANAB_HUMAN]	9	1	5	4	0	5	2	2.5	not det.
O43175	D-3-phosphoglycerate dehydrogenase OS=Homo sapiens GN=PHGDH PE=1 SV=4 - [SERA_HUMAN]	24	23	23	12	7	23.3333	9.5	2.45614	y
Q9NR30	Nucleolar RNA helicase 2 OS=Homo sapiens GN=DDX21 PE=1 SV=5 - [DDX21_HUMAN]	7	2	2	2	1	3.66667	1.5	2.44444	not det.
O00232	26S proteasome non-ATPase regulatory subunit 12 OS=Homo sapiens GN=PSMD12 PE=1 SV=3 - [PSD12_HUMAN]	3	3	5	3	0	3.66667	1.5	2.44444	not det.
O75821	Eukaryotic translation initiation factor 3 subunit G OS=Homo sapiens GN=EIF3G PE=1 SV=2 - [EIF3G_HUMAN]	3	4	4	3	0	3.66667	1.5	2.44444	not det.
Q92769	Histone deacetylase 2 OS=Homo sapiens GN=HDAC2 PE=1 SV=2 - [HDAC2_HUMAN]	5	2	4	3	0	3.66667	1.5	2.44444	not det.
E9PC52	Histone-binding protein RBBP7 OS=Homo sapiens GN=RBBP7 PE=1 SV=1 - [E9PC52_HUMAN]	4	4	3	3	0	3.66667	1.5	2.44444	not det.
A0A024QZP7	Cell division cycle 2, G1 to S and G2 to M, isoform CRA_a OS=Homo sapiens GN=CDC2 PE=1 SV=1 - [A0A024QZP7_HUMAN]	6	4	1	3	0	3.66667	1.5	2.44444	not det.
F8W020	Nucleosome assembly protein 1-like 1 (Fragment) OS=Homo sapiens GN=NAP1L1 PE=1 SV=1 - [F8W020_HUMAN]	3	5	3	2	1	3.66667	1.5	2.44444	not det.
K7EJE8	Lon protease homolog, mitochondrial OS=Homo sapiens GN=LONP1 PE=1 SV=1 - [K7EJE8_HUMAN]	5	4	2	3	0	3.66667	1.5	2.44444	not det.
P47897	Glutamine--tRNA ligase OS=Homo sapiens GN=QARS PE=1 SV=1 - [SYQ_HUMAN]	7	6	5	5	0	6	2.5	2.4	not det.
P49588	Alanine--tRNA ligase, cytoplasmic OS=Homo sapiens GN=AARS PE=1 SV=2 - [SYAC_HUMAN]	6	10	9	6	1	8.33333	3.5	2.38095	not det.
P50990	T-complex protein 1 subunit theta OS=Homo sapiens GN=CCT8 PE=1 SV=4 - [TCPQ_HUMAN]	11	13	8	7	2	10.6667	4.5	2.37037	y
Q12906	Interleukin enhancer-binding factor 3 OS=Homo sapiens GN=ILF3 PE=1 SV=3 - [ILF3_HUMAN]	8	6	7	6	0	7	3	2.33333	not det.
E9PDE8	Heat shock 70 kDa protein 4L OS=Homo sapiens GN=HSPA4L PE=1 SV=1 - [E9PDE8_HUMAN]	4	6	4	4	0	4.66667	2	2.33333	not det.
Q9Y230	RuvB-like 2 OS=Homo sapiens GN=RUVBL2 PE=1 SV=3 - [RUVB2_HUMAN]	4	5	5	2	2	4.66667	2	2.33333	not det.
P31153	S-adenosylmethionine synthase isoform type-2 OS=Homo sapiens GN=MAT2A PE=1 SV=1 - [METK2_HUMAN]	6	4	4	4	0	4.66667	2	2.33333	not det.
O60684	Importin subunit alpha-7 OS=Homo sapiens GN=KPNA6 PE=1 SV=1 - [IMA7_HUMAN]	1	7	6	4	0	4.66667	2	2.33333	not det.
C9JL25	60 kDa heat shock protein, mitochondrial (Fragment) OS=Homo sapiens GN=HSPD1 PE=1 SV=1 - [C9JL25_HUMAN]	7	4	3	4	0	4.66667	2	2.33333	not det.
Q8IVL0	Neuron navigator 3 OS=Homo sapiens GN=NAV3 PE=1 SV=3 - [NAV3_HUMAN]	1	3	3	1	1	2.33333	1	2.33333	not det.
M0R0P7	60S ribosomal protein L18a OS=Homo sapiens GN=RPL18A PE=1 SV=1 - [M0R0P7_HUMAN]	3	1	3	2	0	2.33333	1	2.33333	not det.
E7ESY4	Metastasis-associated protein MTA1 OS=Homo sapiens GN=MTA1 PE=1 SV=1 - [E7ESY4_HUMAN]	3	2	2	1	1	2.33333	1	2.33333	not det.
J3QQM1	26S protease regulatory subunit 8 (Fragment) OS=Homo sapiens GN=PSMC5 PE=1 SV=1 - [J3QQM1_HUMAN]	4	3	0	2	0	2.33333	1	2.33333	not det.
Q8NDH2	Coiled-coil domain-containing protein 168 OS=Homo sapiens GN=CCDC168 PE=2 SV=2 - [CC168_HUMAN]	1	1	5	2	0	2.33333	1	2.33333	not det.
Q13045	Protein flightless-1 homolog OS=Homo sapiens GN=FLII PE=1 SV=2 - [FLII_HUMAN]	3	1	3	2	0	2.33333	1	2.33333	not det.
F6QMI7	Dystonin OS=Homo sapiens GN=DST PE=1 SV=2 - [F6QMI7_HUMAN]	2	2	3	0	2	2.33333	1	2.33333	not det.
H0YMZ1	Proteasome subunit alpha type (Fragment) OS=Homo sapiens GN=PSMA4 PE=1 SV=5 - [H0YMZ1_HUMAN]	3	2	2	2	0	2.33333	1	2.33333	not det.
A0A087WV90	Dystrophin OS=Homo sapiens GN=DMD PE=1 SV=1 - [A0A087WV90_HUMAN]	1	4	2	1	1	2.33333	1	2.33333	not det.
G5EA18	Double-stranded RNA-binding protein Staufen homolog 2 OS=Homo sapiens GN=STAU2 PE=1 SV=1 - [G5EA18_HUMAN]	2	5	0	2	0	2.33333	1	2.33333	not det.
Q8N1G4	Leucine-rich repeat-containing protein 47 OS=Homo sapiens GN=LRRC47 PE=1 SV=1 - [LRC47_HUMAN]	1	3	3	2	0	2.33333	1	2.33333	not det.
P15531	Nucleoside diphosphate kinase A OS=Homo sapiens GN=NME1 PE=1 SV=1 - [NDKA_HUMAN]	3	2	2	1	1	2.33333	1	2.33333	not det.
P19367	Hexokinase-1 OS=Homo sapiens GN=HK1 PE=1 SV=3 - [HXK1_HUMAN]	5	1	1	0	2	2.33333	1	2.33333	not det.
O43707	Alpha-actinin-4 OS=Homo sapiens GN=ACTN4 PE=1 SV=2 - [ACTN4_HUMAN]	20	10	11	11	1	13.6667	6	2.27778	n
Q14566	DNA replication licensing factor MCM6 OS=Homo sapiens GN=MCM6 PE=1 SV=1 - [MCM6_HUMAN]	7	8	5	6	0	6.66667	3	2.22222	not det.
Q13564	NEDD8-activating enzyme E1 regulatory subunit OS=Homo sapiens GN=NAE1 PE=1 SV=1 - [ULA1_HUMAN]	3	3	4	3	0	3.33333	1.5	2.22222	not det.
A0A087WUK2	Heterogeneous nuclear ribonucleoprotein D-like OS=Homo sapiens GN=HNRNPDL PE=1 SV=1 - [A0A087WUK2_HUMAN]	6	2	2	3	0	3.33333	1.5	2.22222	not det.
Q09028	Histone-binding protein RBBP4 OS=Homo sapiens GN=RBBP4 PE=1 SV=3 - [RBBP4_HUMAN]	4	3	3	3	0	3.33333	1.5	2.22222	not det.
O60907	F-box-like/WD repeat-containing protein TBL1X OS=Homo sapiens GN=TBL1X PE=1 SV=3 - [TBL1X_HUMAN]	2	4	4	1	2	3.33333	1.5	2.22222	not det.
P18669	Phosphoglycerate mutase 1 OS=Homo sapiens GN=PGAM1 PE=1 SV=2 - [PGAM1_HUMAN]	5	3	2	3	0	3.33333	1.5	2.22222	not det.
E7ENN3	Nesprin-1 OS=Homo sapiens GN=SYNE1 PE=1 SV=2 - [E7ENN3_HUMAN]	3	5	2	3	0	3.33333	1.5	2.22222	not det.
Q7Z406	Myosin-14 OS=Homo sapiens GN=MYH14 PE=1 SV=2 - [MYH14_HUMAN]	2	2	6	3	0	3.33333	1.5	2.22222	not det.
Q15365	Poly(rC)-binding protein 1 OS=Homo sapiens GN=PCBP1 PE=1 SV=2 - [PCBP1_HUMAN]	4	5	1	3	0	3.33333	1.5	2.22222	not det.
Q00839	Heterogeneous nuclear ribonucleoprotein U OS=Homo sapiens GN=HNRNPU PE=1 SV=6 - [HNRPU_HUMAN]	15	15	13	11	2	14.3333	6.5	2.20513	y
Q5T6W2	Heterogeneous nuclear ribonucleoprotein K (Fragment) OS=Homo sapiens GN=HNRNPK PE=1 SV=1 - [Q5T6W2_HUMAN]	10	9	14	8	2	11	5	2.2	y
P22626	Heterogeneous nuclear ribonucleoproteins A2/B1 OS=Homo sapiens GN=HNRNPA2B1 PE=1 SV=2 - [ROA2_HUMAN]	11	14	11	10	1	12	5.5	2.18182	y
P46060	Ran GTPase-activating protein 1 OS=Homo sapiens GN=RANGAP1 PE=1 SV=1 - [RAGP1_HUMAN]	8	9	9	7	1	8.66667	4	2.16667	not det.
F5H6Q2	Polyubiquitin-C (Fragment) OS=Homo sapiens GN=UBC PE=1 SV=5 - [F5H6Q2_HUMAN]	5	5	6	3	2	5.33333	2.5	2.13333	not det.
P26639	Threonine--tRNA ligase, cytoplasmic OS=Homo sapiens GN=TARS PE=1 SV=3 - [SYTC_HUMAN]	5	6	5	5	0	5.33333	2.5	2.13333	not det.
P23396	40S ribosomal protein S3 OS=Homo sapiens GN=RPS3 PE=1 SV=2 - [RS3_HUMAN]	9	5	5	5	1	6.33333	3	2.11111	not det.
P00338	L-lactate dehydrogenase A chain OS=Homo sapiens GN=LDHA PE=1 SV=2 - [LDHA_HUMAN]	31	16	16	19	1	21	10	2.1	y
P18206	Vinculin OS=Homo sapiens GN=VCL PE=1 SV=4 - [VINC_HUMAN]	11	8	6	5	3	8.33333	4	2.08333	not det.
Q8N3K9	Cardiomyopathy-associated protein 5 OS=Homo sapiens GN=CMYA5 PE=1 SV=3 - [CMYA5_HUMAN]	2	4	6	2	2	4	2	2	not det.
P62826	GTP-binding nuclear protein Ran OS=Homo sapiens GN=RAN PE=1 SV=3 - [RAN_HUMAN]	2	6	4	4	0	4	2	2	not det.
P62937	Peptidyl-prolyl cis-trans isomerase A OS=Homo sapiens GN=PPIA PE=1 SV=2 - [PPIA_HUMAN]	4	5	3	4	0	4	2	2	not det.
P31150	Rab GDP dissociation inhibitor alpha OS=Homo sapiens GN=GDI1 PE=1 SV=2 - [GDIA_HUMAN]	1	5	6	4	0	4	2	2	not det.
Q4VCS5	Angiomotin OS=Homo sapiens GN=AMOT PE=1 SV=1 - [AMOT_HUMAN]	1	5	3	2	1	3	1.5	2	not det.
Q8N1F7	Nuclear pore complex protein Nup93 OS=Homo sapiens GN=NUP93 PE=1 SV=2 - [NUP93_HUMAN]	3	1	5	3	0	3	1.5	2	not det.
Q29RF7	Sister chromatid cohesion protein PDS5 homolog A OS=Homo sapiens GN=PDS5A PE=1 SV=1 - [PDS5A_HUMAN]	3	4	2	2	1	3	1.5	2	not det.
A0A0B4J1W3	N-alpha-acetyltransferase 15, NatA auxiliary subunit OS=Homo sapiens GN=NAA15 PE=1 SV=1 - [A0A0B4J1W3_HUMAN]	2	2	5	2	1	3	1.5	2	not det.
O95347	Structural maintenance of chromosomes protein 2 OS=Homo sapiens GN=SMC2 PE=1 SV=2 - [SMC2_HUMAN]	4	2	3	3	0	3	1.5	2	not det.
O95359	Transforming acidic coiled-coil-containing protein 2 OS=Homo sapiens GN=TACC2 PE=1 SV=3 - [TACC2_HUMAN]	2	2	5	1	2	3	1.5	2	not det.
Q9NSD9	Phenylalanine--tRNA ligase beta subunit OS=Homo sapiens GN=FARSB PE=1 SV=3 - [SYFB_HUMAN]	3	2	4	2	1	3	1.5	2	not det.
H3BQK9	Microtubule-actin cross-linking factor 1, isoforms 1/2/3/5 OS=Homo sapiens GN=MACF1 PE=1 SV=1 - [H3BQK9_HUMAN]	3	3	3	1	2	3	1.5	2	not det.
A0A087WTJ9	E3 ubiquitin-protein ligase UBR1 OS=Homo sapiens GN=UBR1 PE=1 SV=1 - [A0A087WTJ9_HUMAN]	1	3	2	1	1	2	1	2	not det.
Q12873	Chromodomain-helicase-DNA-binding protein 3 OS=Homo sapiens GN=CHD3 PE=1 SV=3 - [CHD3_HUMAN]	2	1	3	1	1	2	1	2	not det.
P20930	Filaggrin OS=Homo sapiens GN=FLG PE=1 SV=3 - [FILA_HUMAN]	2	1	3	0	2	2	1	2	not det.
K4DI93	Cullin 4B, isoform CRA_e OS=Homo sapiens GN=CUL4B PE=1 SV=1 - [K4DI93_HUMAN]	1	2	3	1	1	2	1	2	not det.
C9JT67	Coiled-coil domain-containing protein 144A OS=Homo sapiens GN=CCDC144A PE=4 SV=1 - [C9JT67_HUMAN]	2	1	3	2	0	2	1	2	not det.
J3QQM9	Secernin-2 (Fragment) OS=Homo sapiens GN=SCRN2 PE=1 SV=1 - [J3QQM9_HUMAN]	1	2	3	1	1	2	1	2	not det.
B7Z6Z4	Myosin light polypeptide 6 OS=Homo sapiens GN=MYL6 PE=1 SV=1 - [B7Z6Z4_HUMAN]	1	3	2	1	1	2	1	2	not det.
O95163	Elongator complex protein 1 OS=Homo sapiens GN=IKBKAP PE=1 SV=3 - [ELP1_HUMAN]	2	3	1	2	0	2	1	2	not det.
P47914	60S ribosomal protein L29 OS=Homo sapiens GN=RPL29 PE=1 SV=2 - [RL29_HUMAN]	2	3	1	1	1	2	1	2	not det.
H7BXC7	Pleckstrin homology domain-containing family G member 2 (Fragment) OS=Homo sapiens GN=PLEKHG2 PE=1 SV=1 - [H7BXC7_HUMAN]	2	3	1	2	0	2	1	2	not det.
E7EP17	Dynein heavy chain 9, axonemal OS=Homo sapiens GN=DNAH9 PE=1 SV=1 - [E7EP17_HUMAN]	1	4	1	2	0	2	1	2	not det.
Q70CQ2	Ubiquitin carboxyl-terminal hydrolase 34 OS=Homo sapiens GN=USP34 PE=1 SV=2 - [UBP34_HUMAN]	2	1	3	2	0	2	1	2	not det.
Q9UIA9	Exportin-7 OS=Homo sapiens GN=XPO7 PE=1 SV=3 - [XPO7_HUMAN]	1	3	2	2	0	2	1	2	not det.
E9PG32	Dynein heavy chain 12, axonemal OS=Homo sapiens GN=DNAH12 PE=4 SV=2 - [E9PG32_HUMAN]	2	2	2	0	2	2	1	2	not det.
Q96T17	MAP7 domain-containing protein 2 OS=Homo sapiens GN=MAP7D2 PE=1 SV=2 - [MA7D2_HUMAN]	2	3	1	1	1	2	1	2	not det.
A0A0D9SGD0	HCG1821261 OS=Homo sapiens GN=SLC12A5 PE=1 SV=1 - [A0A0D9SGD0_HUMAN]	0	5	1	1	1	2	1	2	not det.
Q7Z7A1	Centriolin OS=Homo sapiens GN=CNTRL PE=1 SV=2 - [CNTRL_HUMAN]	4	2	0	0	2	2	1	2	not det.
P30041	Peroxiredoxin-6 OS=Homo sapiens GN=PRDX6 PE=1 SV=3 - [PRDX6_HUMAN]	1	2	3	1	1	2	1	2	not det.
O43172	U4/U6 small nuclear ribonucleoprotein Prp4 OS=Homo sapiens GN=PRPF4 PE=1 SV=2 - [PRP4_HUMAN]	2	1	3	2	0	2	1	2	not det.
Q96BY7	Autophagy-related protein 2 homolog B OS=Homo sapiens GN=ATG2B PE=1 SV=5 - [ATG2B_HUMAN]	1	3	2	0	2	2	1	2	not det.
Q13547	Histone deacetylase 1 OS=Homo sapiens GN=HDAC1 PE=1 SV=1 - [HDAC1_HUMAN]	3	1	2	2	0	2	1	2	not det.
Q06830	Peroxiredoxin-1 OS=Homo sapiens GN=PRDX1 PE=1 SV=1 - [PRDX1_HUMAN]	4	0	2	2	0	2	1	2	not det.
Q2TAY7	WD40 repeat-containing protein SMU1 OS=Homo sapiens GN=SMU1 PE=1 SV=2 - [SMU1_HUMAN]	2	2	2	2	0	2	1	2	not det.
A0A096LP30	Hemicentin-2 OS=Homo sapiens GN=HMCN2 PE=1 SV=1 - [A0A096LP30_HUMAN]	0	6	0	1	1	2	1	2	not det.
E9PAV3	Nascent polypeptide-associated complex subunit alpha, muscle-specific form OS=Homo sapiens GN=NACA PE=1 SV=1 - [NACAM_HUMAN]	1	2	3	2	0	2	1	2	not det.
Q9UEW3	Macrophage receptor MARCO OS=Homo sapiens GN=MARCO PE=1 SV=1 - [MARCO_HUMAN]	2	2	2	1	1	2	1	2	not det.
F8W8Y7	Armadillo repeat-containing X-linked protein 4 OS=Homo sapiens GN=ARMCX4 PE=1 SV=3 - [F8W8Y7_HUMAN]	1	5	0	2	0	2	1	2	not det.
P0DMV9	Heat shock 70 kDa protein 1B OS=Homo sapiens GN=HSPA1B PE=1 SV=1 - [HS71B_HUMAN]	42	41	24	21	15	35.6667	18	1.98148	y

## Sheet: Table S2
Gene ontology chart for proteins displaying >2-fold enrichment, >2 spectral counts (SCFA 6-enriched relative to control)
Category	Term	Count	%	PValue	Genes	List Total	Pop Hits	Pop Total	Fold Enrichment	Bonferroni	Benjamini	FDR
SP_PIR_KEYWORDS	acetylation	361	57.9454	1.46648e-153	P46940, P00367, P36578, Q13200, P55735, Q9H0A0, O60610, Q9Y2L1, P07741, P37802, P23528, O43175, P23246, Q09028, P49792, Q8WXH0, Q8N1F7, Q13564, O43390, P47914, Q00839, P23396, Q5HY54, O60506, P49588, Q5T4S7, Q9BZZ5, P41252, P54577, P41250, O75369, Q13347, O43776, P23921, Q8N1G2, P00558, Q9BV73, P62258, Q8N1G4, Q9NSD9, P67775, O60518, P49591, Q15459, O00410, A6NHR9, P43686, P40227, P18206, Q01813,…	623	2635	19235	4.22991	7.0831e-151	7.0831e-151	2.10152e-150
SP_PIR_KEYWORDS	phosphoprotein	477	76.565	3.06431e-89	P46940, Q13200, P55735, Q7L1Q6, P07741, P53621, P13645, Q8WXH0, Q9BYB0, P47914, Q00839, Q9BZZ5, O75369, Q13347, Q8WXI7, Q9P2E9, Q9BV73, Q2LD37, P67775, Q9NSD9, O95782, P13797, A6NHR9, Q96G74, Q9Y6G9, P40227, Q8IWJ2, Q9BQ67, Q9ULI0, Q8N163, P27348, P51398, P14625, O75083, O75081, Q6P2Q9, Q8IWI9, P55072, Q92900, P63104, P27824, Q8TAQ2, P51991, Q9H6K5, Q96P48, P19367, Q9NQG5, P07814, Q9P2C4, Q8IVF2,…	623	7263	19235	2.02771	1.48006e-86	7.40031e-87	4.39127e-86
SP_PIR_KEYWORDS	cytoplasm	260	41.7335	7.91198e-48	Q9NX46, O60610, Q9Y2L1, P07741, P23528, Q15717, P49796, P53621, Q8WXH0, Q9BYB0, O43390, Q00839, P23396, Q5HY54, O60506, Q08J23, P49588, Q5T4S7, Q9BZZ5, Q9Y2K3, P41252, P54577, O75369, P28074, Q13347, O43776, P23921, Q9UBF2, P00558, Q9BV73, P62258, Q9NSD9, P67775, Q8TCG1, O60518, P49591, P13797, O00410, P43686, P40227, P18206, Q8IWJ2, Q92797, P35606, Q58FG1, P11766, P27348, Q9Y678, O75083, Q92900,…	623	3332	19235	2.4092	3.82148e-45	1.27383e-45	1.13382e-44
GOTERM_CC_FAT	GO:0005829~cytosol	148	23.756	1.21158e-33	P35520, Q9HC10, Q13200, P32019, P36578, P07741, P49915, P17858, P49796, P53621, P38606, P49792, P53396, P47914, P62263, P23396, Q5HY54, Q16543, Q9Y490, P18669, P17987, O75821, P41252, Q7Z7A1, P41250, P60842, P28074, Q13347, P55795, P23921, Q15149, O43776, Q9BV73, P62258, Q9NSD9, O75131, P67775, O00763, Q15008, Q02878, O95782, P49591, P63241, O00170, P43686, P40227, Q14974, Q01813, P18206, P60953,…	501	1330	12782	2.83904	5.54902e-31	5.54902e-31	1.72319e-30
SP_PIR_KEYWORDS	atp-binding	125	20.0642	7.16036e-28	P00367, Q9H0A0, P52701, P31153, Q8IWY7, O15523, P49915, Q9Y230, P17858, Q96PY6, P38606, O00148, P53396, Q00839, Q92878, P49588, P17987, P41252, Q9Y2K3, P41250, P54577, O60282, Q2NKX8, P60842, P23921, O43776, P00558, Q9NSD9, Q8TD19, Q9NU22, O00763, P49591, P43686, P40227, P34932, Q9Y6G9, Q01813, P12956, Q9ULI0, Q58FG1, P54136, P16615, Q99832, P61221, P22392, P14625, P22102, P08243, P50990, P49736,…	623	1326	19235	2.91052	3.45845e-25	8.64613e-26	1.02611e-24
SP_PIR_KEYWORDS	protein biosynthesis	46	7.38363	1.30082e-26	P56192, P46777, P14868, P47897, P54136, P32969, O43432, P62424, P47914, O00303, P38919, P62263, P23396, P62701, P46781, P15880, P46783, P05386, P49588, P49411, O75821, P26639, P05388, P41252, Q14152, P54577, P41250, P60842, Q6PI48, Q9Y262, P26641, Q13347, O43776, P07814, O15371, P12081, Q9P2J5, Q9NSD9, Q02878, P49591, Q99613, P26373, P63241, P56537, P41091	623	188	19235	7.55447	6.28297e-24	1.25659e-24	1.86413e-23
SP_PIR_KEYWORDS	nucleotide-binding	139	22.3114	2.28132e-25	P00367, Q9H0A0, P52701, Q9BVP2, P31153, Q8IWY7, O15523, P49915, Q9Y230, P17858, Q96PY6, P38606, O00148, P53396, Q00839, Q92878, P49411, P49588, P17987, P41252, Q9Y2K3, P54577, P41250, O60282, Q2NKX8, P60842, P23921, O43776, P00558, Q9NSD9, Q8TD19, Q9NU22, O00763, P49591, P43686, P40227, P34932, Q9Y6G9, Q01813, P60953, P12956, Q9ULI0, Q58FG1, P54136, P16615, Q99832, P61221, P22392, P14625, P22102,…	623	1686	19235	2.54543	1.10188e-22	1.83646e-23	3.26921e-22
GOTERM_CC_FAT	GO:0070013~intracellular organelle lumen	152	24.3981	3.92097e-22	Q16531, P46940, Q12906, P24752, P35520, P00367, Q9H0A0, P52597, Q9BVP2, Q9Y2L1, Q9Y230, Q9UQ35, P23246, P23528, P56545, Q09028, P05455, O43390, O43707, P62263, O60506, Q08J23, P49411, P22626, O60907, P41250, P04181, P55795, P42704, P07237, Q15459, P56537, O00410, Q9Y4W2, Q14974, Q92794, Q9BQ67, Q92797, P12956, Q8N163, P54136, P09874, P09622, Q2NL82, P12814, P51398, O00267, P14625, O75081, P49736,…	501	1779	12782	2.17986	1.7958e-19	8.97902e-20	5.57667e-19
GOTERM_MF_FAT	GO:0000166~nucleotide binding	180	28.8925	5.81888e-22	P00367, Q9H0A0, P52597, P52701, Q9BVP2, P31153, P07741, Q8IWY7, Q99714, O15523, Q9Y230, P49915, O43175, P23246, P17858, Q15717, Q96PY6, P56545, P05455, P38606, O00148, O43390, P53396, Q00839, O60506, Q13151, Q92878, P49588, P49411, P17987, P22626, O75821, Q9Y2K3, P41252, P54577, P41250, O60282, Q2NKX8, P60842, P55795, P23921, O43776, P00558, Q9NSD9, Q8TD19, O00763, Q9NU22, P49591, Q9H361, P43686,…	524	2245	12983	1.98655	4.39908e-19	4.39908e-19	8.86561e-19
GOTERM_CC_FAT	GO:0031974~membrane-enclosed lumen	154	24.7191	3.50018e-21	Q16531, P46940, Q12906, P24752, P35520, P00367, Q9H0A0, P52597, Q9BVP2, Q9Y2L1, Q9Y230, Q9UQ35, P23246, P23528, P56545, Q09028, P05455, O43390, O43707, P62263, O60506, Q08J23, P49411, P22626, O60907, P41250, P04181, P55795, P42704, P07237, Q15459, P56537, O00410, Q9Y4W2, Q14974, Q92794, Q9BQ67, P12956, Q92797, Q8N163, P54136, P09874, P09622, Q2NL82, P12814, P51398, O00267, P14625, O75081, P49736,…	501	1856	12782	2.11692	1.60308e-18	5.34361e-19	4.9782e-18
GOTERM_CC_FAT	GO:0043233~organelle lumen	152	24.3981	3.78961e-21	Q16531, P46940, Q12906, P24752, P35520, P00367, Q9H0A0, P52597, Q9BVP2, Q9Y2L1, Q9Y230, Q9UQ35, P23246, P23528, P56545, Q09028, P05455, O43390, O43707, P62263, O60506, Q08J23, P49411, P22626, O60907, P41250, P04181, P55795, P42704, P07237, Q15459, P56537, O00410, Q9Y4W2, Q14974, Q92794, Q9BQ67, Q92797, P12956, Q8N163, P54136, P09874, P09622, Q2NL82, P12814, P51398, O00267, P14625, O75081, P49736,…	501	1820	12782	2.13075	1.73564e-18	4.33911e-19	5.38985e-18
INTERPRO	IPR011989:Armadillo-like helical	34	5.45746	8.75943e-20	O95996, Q5VYK3, Q14974, P55060, P30154, O75533, P30153, Q99460, O14617, Q86VP6, O95373, Q9Y678, P52292, Q86Y56, Q9HAV4, Q9H3U1, O00629, Q96T76, Q7Z7L7, P52294, Q92973, Q92616, Q8TEX9, Q14008, Q96P70, O60684, Q9UBF2, O14980, Q10567, O95782, Q8TCG1, O60518, P53618, O00410	590	128	16659	7.50008	1.02573e-16	1.02573e-16	1.4118e-16
GOTERM_CC_FAT	GO:0043228~non-membrane-bounded organelle	187	30.0161	2.45222e-19	Q12906, P46940, P35520, P36578, P55735, Q9H0A0, P52597, P52701, O60610, Q9Y2L1, Q9BVP2, Q9ULV4, P35527, O00291, Q8IWY7, P23528, Q4VCS5, Q09028, P13645, P05455, Q9BYB0, Q8WXH0, P47914, O43707, P62263, P23396, Q5HY54, Q08J23, Q9Y490, Q92878, P49411, P17987, Q5T4S7, P22626, P20930, Q9Y2K3, O60907, Q7Z7A1, Q16643, O60282, O75369, Q2NKX8, P55795, Q15149, P42704, Q9P2E9, Q9BV73, Q9Y232, P67775, Q02878,…	501	2596	12782	1.8378	1.12312e-16	2.24624e-17	3.48772e-16
GOTERM_CC_FAT	GO:0043232~intracellular non-membrane-bounded organelle	187	30.0161	2.45222e-19	Q12906, P46940, P35520, P36578, P55735, Q9H0A0, P52597, P52701, O60610, Q9Y2L1, Q9BVP2, Q9ULV4, P35527, O00291, Q8IWY7, P23528, Q4VCS5, Q09028, P13645, P05455, Q9BYB0, Q8WXH0, P47914, O43707, P62263, P23396, Q5HY54, Q08J23, Q9Y490, Q92878, P49411, P17987, Q5T4S7, P22626, P20930, Q9Y2K3, O60907, Q7Z7A1, Q16643, O60282, O75369, Q2NKX8, P55795, Q15149, P42704, Q9P2E9, Q9BV73, Q9Y232, P67775, Q02878,…	501	2596	12782	1.8378	1.12312e-16	2.24624e-17	3.48772e-16
GOTERM_CC_FAT	GO:0030529~ribonucleoprotein complex	69	11.0754	2.8087e-19	Q12906, Q15185, P36578, P52597, Q5CZC0, Q15029, Q9UQ35, P31943, P32969, Q9BWF3, Q08211, P05455, P62424, O43390, Q9UQ80, P47914, P10155, O43707, Q00839, P62263, P23396, O60506, P15880, Q13151, Q9Y3F4, O94906, P22626, Q9BZZ5, P06748, O76094, P55795, Q9P2E9, Q9UNY4, Q02878, Q15393, P19338, Q15366, Q15459, Q15365, Q5T6W2, P46777, P14866, Q9UMS4, P27797, O75533, Q7KZF4, P51398, Q6P2Q9, P38919, Q9UHB9,…	501	515	12782	3.41824	1.28638e-16	2.14397e-17	3.99472e-16
GOTERM_MF_FAT	GO:0005524~ATP binding	130	20.8668	1.66748e-18	P00367, Q9H0A0, P52701, P31153, Q8IWY7, O15523, P49915, Q9Y230, P17858, Q96PY6, P38606, O00148, P53396, Q00839, Q92878, P49588, P17987, P41252, Q9Y2K3, P41250, P54577, O60282, Q2NKX8, P60842, P23921, O43776, P00558, Q9NSD9, Q8TD19, Q9NU22, O00763, P49591, P43686, A6NHR9, P40227, P34932, Q9Y6G9, Q01813, P12956, Q9ULI0, Q58FG1, P54136, P16615, Q99832, P61221, P22392, P14625, P22102, P08243, P50990,…	524	1477	12983	2.18075	1.26061e-15	6.30307e-16	2.54056e-15
GOTERM_MF_FAT	GO:0032559~adenyl ribonucleotide binding	131	21.0273	1.9042e-18	P00367, Q9H0A0, P52701, P31153, P07741, Q8IWY7, O15523, P49915, Q9Y230, P17858, Q96PY6, P38606, O00148, P53396, Q00839, Q92878, P49588, P17987, P41252, Q9Y2K3, P41250, P54577, O60282, Q2NKX8, P60842, P23921, O43776, P00558, Q9NSD9, Q8TD19, Q9NU22, O00763, P49591, P43686, A6NHR9, P40227, P34932, Q9Y6G9, Q01813, P12956, Q9ULI0, Q58FG1, P54136, P16615, Q99832, P61221, P22392, P14625, P22102, P08243,…	524	1497	12983	2.16817	1.43957e-15	4.79858e-16	2.90122e-15
UP_SEQ_FEATURE	repeat:HEAT 6	18	2.88925	3.27804e-18	Q9BPX3, Q96T76, Q5VYK3, O75155, Q14974, Q92973, Q92616, O75533, P30154, Q8TEX9, P30153, Q14008, Q86VP6, Q9UBF2, O14980, Q86Y56, O60518, O00410	623	30	19113	18.4074	7.5395e-15	7.5395e-15	5.72797e-15
UP_SEQ_FEATURE	repeat:HEAT 5	19	3.04976	3.46223e-18	Q9BPX3, Q96T76, Q5VYK3, O75155, Q14974, Q92973, Q92616, O75533, P30154, Q8TEX9, P30153, Q14008, Q86VP6, O43432, Q9UBF2, O14980, Q86Y56, O60518, O00410	623	35	19113	16.6543	7.96312e-15	3.98156e-15	6.0498e-15
GOTERM_MF_FAT	GO:0001882~nucleoside binding	136	21.8299	7.66278e-18	P00367, Q9H0A0, P52701, P31153, P07741, Q8IWY7, O15523, P49915, Q9Y230, P17858, Q96PY6, P38606, O00148, P53396, O43707, Q00839, Q92878, P49588, P17987, P41252, Q9Y2K3, P54577, P41250, O60282, Q2NKX8, P60842, P23921, O43776, P00558, Q9NSD9, Q8TD19, Q9NU22, O00763, P49591, P43686, A6NHR9, P40227, P34932, Q9Y6G9, Q01813, P12956, Q9ULI0, Q58FG1, P09622, P54136, P16615, Q99832, P61221, P22392, P14625,…	524	1612	12983	2.09034	5.79306e-15	1.44826e-15	1.1675e-14
GOTERM_MF_FAT	GO:0030554~adenyl nucleotide binding	134	21.5088	8.10365e-18	P00367, Q9H0A0, P52701, P31153, P07741, Q8IWY7, O15523, P49915, Q9Y230, P17858, Q96PY6, P38606, O00148, P53396, Q00839, Q92878, P49588, P17987, P41252, Q9Y2K3, P54577, P41250, O60282, Q2NKX8, P60842, P23921, O43776, P00558, Q9NSD9, Q8TD19, Q9NU22, O00763, P49591, P43686, A6NHR9, P40227, P34932, Q9Y6G9, Q01813, P12956, Q9ULI0, Q58FG1, P09622, P54136, P16615, Q99832, P61221, P22392, P14625, P22102,…	524	1577	12983	2.10531	6.12636e-15	1.22527e-15	1.23467e-14
SP_PIR_KEYWORDS	rna-binding	62	9.95185	9.89143e-18	Q12906, P52597, Q9Y2L1, O15523, Q9UQ35, P31943, P23246, Q15717, Q9BWF3, Q08211, P05455, O43390, Q9UQ80, Q9HAV4, P10155, Q00839, P23396, O60506, Q13151, Q08J23, Q10570, P49588, P22626, O75821, P54577, P06748, P60842, Q15020, P55795, P42704, Q8NI27, P19338, Q15366, P63241, Q15365, Q5T6W2, Q9H361, P56192, P46777, P14866, Q92841, O43432, Q6P2Q9, O00425, P38919, Q9UHB9, A6NLN1, P62701, P46781, Q9NR30,…	623	540	19235	3.54488	4.77756e-15	6.82509e-16	1.41748e-14
UP_SEQ_FEATURE	repeat:HEAT 4	20	3.21027	1.54427e-17	Q9BPX3, Q96T76, Q5VYK3, O75155, Q14974, Q92973, Q92616, O75533, P30154, Q8TEX9, P30153, Q14008, Q86VP6, O43432, Q9Y678, Q9UBF2, O14980, Q86Y56, O60518, O00410	623	43	19113	14.2693	3.55182e-14	1.18394e-14	2.69842e-14
GOTERM_MF_FAT	GO:0001883~purine nucleoside binding	134	21.5088	2.86089e-17	P00367, Q9H0A0, P52701, P31153, P07741, Q8IWY7, O15523, P49915, Q9Y230, P17858, Q96PY6, P38606, O00148, P53396, Q00839, Q92878, P49588, P17987, P41252, Q9Y2K3, P54577, P41250, O60282, Q2NKX8, P60842, P23921, O43776, P00558, Q9NSD9, Q8TD19, Q9NU22, O00763, P49591, P43686, A6NHR9, P40227, P34932, Q9Y6G9, Q01813, P12956, Q9ULI0, Q58FG1, P09622, P54136, P16615, Q99832, P61221, P22392, P14625, P22102,…	524	1601	12983	2.07375	2.16283e-14	3.60472e-15	4.35883e-14
GOTERM_MF_FAT	GO:0003723~RNA binding	80	12.8411	9.73074e-17	Q12906, P36578, P52597, Q9Y2L1, O15523, Q9UQ35, P31943, P23246, P32969, Q15717, Q9BWF3, Q08211, P05455, P62424, O43390, Q9UQ80, P47914, Q9HAV4, P10155, Q00839, P23396, P62263, O60506, P15880, Q13151, Q08J23, Q10570, P49588, P22626, O75821, P54577, P06748, P60842, O76094, P55795, Q15020, P42704, Q8N1G4, Q9NSD9, Q8NI27, Q02878, Q12996, P49591, P19338, Q15366, Q15459, Q15365, P63241, Q5T6W2, Q9H361,…	524	718	12983	2.76064	8.39329e-14	1.19904e-14	1.66533e-13
UP_SEQ_FEATURE	repeat:HEAT 3	20	3.21027	4.68424e-16	Q9BPX3, Q96T76, Q5VYK3, O75155, Q14974, Q92973, Q92616, O75533, P30154, Q8TEX9, P30153, Q14008, Q86VP6, O43432, Q9Y678, Q9UBF2, O14980, Q86Y56, O60518, O00410	623	50	19113	12.2716	1.02141e-12	2.55351e-13	7.77156e-13
GOTERM_MF_FAT	GO:0032553~ribonucleotide binding	144	23.114	5.53942e-16	P00367, Q9H0A0, P52701, Q9BVP2, P31153, P07741, Q8IWY7, O15523, P49915, Q9Y230, P17858, Q96PY6, P38606, O00148, P53396, Q00839, Q92878, P49411, P49588, P17987, P41252, Q9Y2K3, P54577, P41250, O60282, Q2NKX8, P60842, P23921, O43776, P00558, Q9NSD9, Q8TD19, Q9NU22, O00763, P49591, P43686, A6NHR9, P40227, P34932, Q9Y6G9, Q01813, P60953, P12956, Q96N67, Q9ULI0, Q58FG1, P54136, P16615, Q99832, P61221,…	524	1836	12983	1.94327	4.19664e-13	5.24025e-14	8.43769e-13
GOTERM_MF_FAT	GO:0032555~purine ribonucleotide binding	144	23.114	5.53942e-16	P00367, Q9H0A0, P52701, Q9BVP2, P31153, P07741, Q8IWY7, O15523, P49915, Q9Y230, P17858, Q96PY6, P38606, O00148, P53396, Q00839, Q92878, P49411, P49588, P17987, P41252, Q9Y2K3, P54577, P41250, O60282, Q2NKX8, P60842, P23921, O43776, P00558, Q9NSD9, Q8TD19, Q9NU22, O00763, P49591, P43686, A6NHR9, P40227, P34932, Q9Y6G9, Q01813, P60953, P12956, Q96N67, Q9ULI0, Q58FG1, P54136, P16615, Q99832, P61221,…	524	1836	12983	1.94327	4.19664e-13	5.24025e-14	8.43769e-13
UP_SEQ_FEATURE	repeat:HEAT 1	21	3.37079	7.19052e-16	Q9BPX3, Q96T76, Q5VYK3, O75155, Q14974, Q92973, Q92616, O75533, P30154, Q8TEX9, P30153, Q14008, P78527, Q86VP6, O43432, Q9Y678, Q9UBF2, O14980, Q86Y56, O60518, O00410	623	58	19113	11.1079	1.53211e-12	3.06422e-13	1.16573e-12
UP_SEQ_FEATURE	repeat:HEAT 2	21	3.37079	7.19052e-16	Q9BPX3, Q96T76, Q5VYK3, O75155, Q14974, Q92973, Q92616, O75533, P30154, Q8TEX9, P30153, Q14008, P78527, Q86VP6, O43432, Q9Y678, Q9UBF2, O14980, Q86Y56, O60518, O00410	623	58	19113	11.1079	1.53211e-12	3.06422e-13	1.16573e-12
GOTERM_BP_FAT	GO:0006412~translation	50	8.02568	1.46043e-15	P56192, P36578, P14868, P46777, P47897, P54136, P32969, O43432, P62424, P47914, O00303, O00425, P23396, P62263, P46781, P62701, P15880, P46783, P49588, P49411, P05386, O75821, P05388, P26639, P41252, Q14152, P41250, P54577, Q9Y262, Q6PI48, P60842, P26641, Q13347, P55795, O43776, P07814, Q9P2E9, Q8N1G4, Q9P2J5, Q9NSD9, P12081, O15371, Q02878, P49591, Q99613, P26373, P63241, P56537, P41091	543	331	13528	3.76336	3.3441e-12	3.3441e-12	2.52021e-12
GOTERM_MF_FAT	GO:0017076~purine nucleotide binding	147	23.5955	1.81253e-15	P00367, Q9H0A0, P52701, Q9BVP2, P31153, P07741, Q8IWY7, O15523, P49915, Q9Y230, P17858, Q96PY6, P38606, O00148, P53396, Q00839, Q92878, P49411, P49588, P17987, P41252, Q9Y2K3, P54577, P41250, O60282, Q2NKX8, P60842, P23921, O43776, P00558, Q9NSD9, Q8TD19, Q9NU22, O00763, P49591, P43686, A6NHR9, P40227, P34932, Q9Y6G9, Q01813, P60953, P12956, Q96N67, Q9ULI0, Q58FG1, P54136, P09622, P16615, Q99832,…	524	1918	12983	1.89895	1.34293e-12	1.49214e-13	2.70894e-12
UP_SEQ_FEATURE	repeat:HEAT 7	15	2.4077	1.83876e-15	Q9BPX3, Q96T76, Q5VYK3, O75155, Q14974, Q92973, Q92616, P30154, O75533, P30153, Q14008, Q86VP6, O14980, Q86Y56, O60518	623	24	19113	19.1744	4.34097e-12	7.23532e-13	3.29736e-12
GOTERM_CC_FAT	GO:0031981~nuclear lumen	117	18.7801	1.3657e-14	P46940, Q12906, Q16531, P35520, P52597, Q9H0A0, Q9BVP2, Q9Y2L1, Q9Y230, Q9UQ35, P23528, P23246, P56545, Q09028, P05455, O43390, O43707, P62263, O60506, Q08J23, P22626, O60907, P55795, P42704, Q15459, P56537, O00410, Q9Y4W2, Q14974, Q92794, Q9BQ67, Q92797, P12956, P09874, P54136, Q2NL82, P12814, O00267, P49736, O75081, Q6P2Q9, Q9UHB9, P55072, Q4G0J3, Q8TAQ2, P51991, P35716, Q9UMN6, Q9Y262, Q13838,…	501	1450	12782	2.05863	6.25433e-12	8.93507e-13	1.94178e-11
UP_SEQ_FEATURE	repeat:HEAT 8	13	2.08668	5.19752e-14	Q9BPX3, Q5VYK3, O75155, Q14974, Q92973, Q92616, P30154, O75533, P30153, Q14008, Q86VP6, O14980, Q86Y56	623	19	19113	20.9909	1.19504e-10	1.7072e-11	9.0794e-11
GOTERM_CC_FAT	GO:0005643~nuclear pore	23	3.69181	1.68367e-13	O00629, P52294, P55735, Q8WUM0, Q14974, Q92973, Q9Y6D9, P55060, Q9UIA9, P46060, Q8TEX9, Q96P70, Q5SRE5, O60684, O95373, P49792, O14980, P52292, Q8N1F7, P62826, P35658, P63241, O00410	501	79	12782	7.42783	7.71367e-11	9.64206e-12	2.39542e-10
UP_SEQ_FEATURE	nucleotide phosphate-binding region:ATP	78	12.5201	2.09318e-13	Q9H0A0, P52701, Q12873, Q3LXA3, P31153, O15523, Q8IWY7, P49915, Q9Y230, P17858, Q96PY6, P53350, Q08211, P38606, O00148, P53396, Q00839, Q9Y265, Q9UBT2, Q14566, Q92878, P22314, Q9Y2K3, Q9H2G2, P41250, O60282, P52732, P35579, Q2NKX8, P60842, P35580, Q7Z406, Q9UNY4, P00558, Q8TD19, O00763, Q9NU22, Q86UT6, P49591, P62191, P43686, Q9Y6G9, Q01813, Q96QE3, Q9ULI0, Q92841, P13535, P33176, P22102, Q5T7B8,…	623	962	19113	2.48748	4.81337e-10	6.01672e-11	3.65685e-10
SP_PIR_KEYWORDS	nucleus	217	34.8315	3.7023e-13	Q9NX46, Q9H0A0, Q9Y2L1, P23246, P23528, P49796, Q09028, P49792, Q8WXH0, Q8N1F7, O43390, Q6NT89, Q00839, O60506, Q08J23, Q5T4S7, Q9BZZ5, O60907, P28074, Q8N1G2, P67775, Q12996, O60518, Q15459, O00410, P43686, Q9Y4W2, P26358, Q92794, Q9BQ67, Q92797, P09874, O75081, Q6P2Q9, Q8IWI9, P55072, Q4G0J3, Q8TAQ2, P51991, P35716, Q29RF7, Q9UMN6, Q13838, Q92688, Q5SRE5, Q9BXP5, Q8IVF2, P14618, O43593, Q9C0G0,…	623	4283	19235	1.56428	1.78835e-10	2.23545e-11	5.30598e-10
SP_PIR_KEYWORDS	Aminoacyl-tRNA synthetase	16	2.56822	4.58472e-13	P56192, P49588, P14868, P26639, P47897, P41252, P54577, P41250, P54136, Q6PI48, O43776, P07814, P12081, Q9P2J5, Q9NSD9, P49591	623	39	19235	12.6666	2.21466e-10	2.46073e-11	6.57074e-10
GOTERM_CC_FAT	GO:0005635~nuclear envelope	35	5.61798	6.86472e-13	Q8IVL0, P55735, Q14573, Q14974, P55060, Q9UIA9, Q13185, P37802, P09874, O95373, P49792, Q8WXH0, P52292, P42166, Q8N1F7, P62826, P12004, O00629, P52294, Q8WUM0, Q92973, Q9Y6D9, P46060, Q8TEX9, Q96P70, P49454, Q5SRE5, O60684, P42704, O14980, P43243, P35658, P63241, P56537, O00410	501	205	12782	4.35587	3.14395e-10	3.49327e-11	9.76319e-10
GOTERM_CC_FAT	GO:0046930~pore complex	24	3.85233	1.21204e-12	O00629, P52294, P55735, Q8WUM0, Q14974, Q92973, Q9Y6D9, P55060, Q9UIA9, P46060, Q8TEX9, Q96P70, Q5SRE5, O60684, O95373, P49792, O14980, P52292, Q8N1F7, P62826, P35658, P63241, O00410, Q9Y277	501	95	12782	6.44538	5.5511e-10	5.5511e-11	1.72383e-09
SP_PIR_KEYWORDS	ribonucleoprotein	37	5.939	1.47921e-12	P36578, P52597, P46777, Q5CZC0, P14866, Q15029, P31943, P32969, P51398, P05455, P62424, O43390, Q9UQ80, P47914, P10155, Q6P2Q9, Q9UHB9, Q00839, P62263, P23396, P62701, O60506, P46781, P15880, P46783, Q13151, P05386, P22626, P51991, P05388, O76094, P55795, Q02878, Q15366, P26373, Q15365, Q5T6W2	623	279	19235	4.09451	7.14483e-10	7.14483e-11	2.11984e-09
UP_SEQ_FEATURE	repeat:HEAT 10	11	1.76565	3.21701e-12	Q9BPX3, Q5VYK3, O75155, O14980, Q92616, Q86Y56, O75533, P30154, P30153, Q14008, Q86VP6	623	15	19113	22.4979	7.39906e-09	8.22118e-10	5.62127e-09
UP_SEQ_FEATURE	repeat:HEAT 9	11	1.76565	3.21701e-12	Q9BPX3, Q5VYK3, O75155, O14980, Q92616, Q86Y56, O75533, P30154, P30153, Q14008, Q86VP6	623	15	19113	22.4979	7.39906e-09	8.22118e-10	5.62127e-09
INTERPRO	IPR000357:HEAT	18	2.88925	3.28292e-12	Q96T76, Q5VYK3, O75155, Q14974, Q92973, Q92797, Q92616, Q29RF7, O75533, P30154, Q8TEX9, P30153, Q14008, P78527, Q86VP6, Q86Y56, O60518, O00410	590	55	16659	9.24074	3.84431e-09	1.92216e-09	5.29125e-09
GOTERM_BP_FAT	GO:0000375~RNA splicing, via transesterification reactions	29	4.6549	1.22751e-11	O14744, P52597, P14866, O75533, Q15029, P31943, Q08211, O43390, O00148, Q6P2Q9, Q00839, A6NLN1, Q13151, Q10570, O94906, P22626, P51991, O75643, Q13838, O43172, P55795, Q92499, Q12996, Q15393, P61326, Q15459, Q15366, Q15365, Q5T6W2	543	153	13528	4.72216	2.84413e-08	1.42207e-08	2.14673e-08
GOTERM_BP_FAT	GO:0000377~RNA splicing, via transesterification reactions with bulged adenosine as nucleophile	29	4.6549	1.22751e-11	O14744, P52597, P14866, O75533, Q15029, P31943, Q08211, O43390, O00148, Q6P2Q9, Q00839, A6NLN1, Q13151, Q10570, O94906, P22626, P51991, O75643, Q13838, O43172, P55795, Q92499, Q12996, Q15393, P61326, Q15459, Q15366, Q15365, Q5T6W2	543	153	13528	4.72216	2.84413e-08	1.42207e-08	2.14673e-08
GOTERM_BP_FAT	GO:0000398~nuclear mRNA splicing, via spliceosome	29	4.6549	1.22751e-11	O14744, P52597, P14866, O75533, Q15029, P31943, Q08211, O43390, O00148, Q6P2Q9, Q00839, A6NLN1, Q13151, Q10570, O94906, P22626, P51991, O75643, Q13838, O43172, P55795, Q92499, Q12996, Q15393, P61326, Q15459, Q15366, Q15365, Q5T6W2	543	153	13528	4.72216	2.84413e-08	1.42207e-08	2.14673e-08
GOTERM_BP_FAT	GO:0008380~RNA splicing	40	6.42055	1.39996e-11	O14744, P52597, P14866, Q9UMS4, O75533, P30153, Q15029, Q9UQ35, P31943, P23246, Q9BWF3, Q08211, O43390, O00148, Q6P2Q9, P38919, Q00839, A6NLN1, O60506, Q13151, Q10570, Q9Y3F4, O94906, O75643, P22626, P51991, Q13838, O43172, P55795, Q92499, Q9UNY4, P67775, Q8NI27, Q12996, Q15393, P61326, Q15459, Q15366, Q15365, Q5T6W2	543	284	13528	3.50894	3.2437e-08	1.08123e-08	2.44832e-08
GOTERM_MF_FAT	GO:0016875~ligase activity, forming carbon-oxygen bonds	17	2.72873	1.81195e-11	P56192, P49588, P14868, P26639, P47897, P41252, P41250, P54577, P54136, Q6PI48, O43776, P07814, Q8N1G4, P12081, Q9P2J5, Q9NSD9, P49591	524	47	12983	8.96179	1.36983e-08	1.36983e-09	2.76068e-08
GOTERM_MF_FAT	GO:0004812~aminoacyl-tRNA ligase activity	17	2.72873	1.81195e-11	P56192, P49588, P14868, P26639, P47897, P41252, P41250, P54577, P54136, Q6PI48, O43776, P07814, Q8N1G4, P12081, Q9P2J5, Q9NSD9, P49591	524	47	12983	8.96179	1.36983e-08	1.36983e-09	2.76068e-08
GOTERM_MF_FAT	GO:0016876~ligase activity, forming aminoacyl-tRNA and related compounds	17	2.72873	1.81195e-11	P56192, P49588, P14868, P26639, P47897, P41252, P41250, P54577, P54136, Q6PI48, O43776, P07814, Q8N1G4, P12081, Q9P2J5, Q9NSD9, P49591	524	47	12983	8.96179	1.36983e-08	1.36983e-09	2.76068e-08
SP_PIR_KEYWORDS	Spliceosome	23	3.69181	3.67971e-11	P52597, Q9Y3F4, O94906, P51991, P22626, O75643, O75533, Q9UMS4, Q15029, Q9UQ35, P31943, Q13838, O43172, Q9UNY4, O43390, Q15393, Q6P2Q9, P38919, Q00839, P61326, Q15459, O60506, Q5T6W2	623	120	19235	5.91767	1.7773e-08	1.61573e-09	5.27316e-08
GOTERM_CC_FAT	GO:0005654~nucleoplasm	76	12.199	9.64191e-11	Q16531, Q14573, P52597, Q12873, Q92769, Q9BVP2, P49643, Q9Y230, Q9UQ35, P31946, P31943, P62136, P56545, O14802, P53350, Q09028, Q9BWF3, O43390, O95163, P62826, Q9Y265, Q14566, O60506, P15880, P52294, Q10570, P22626, O60907, P06748, P55795, Q15020, P42704, Q9UNY4, P19338, Q5T6W2, Q9UJX3, Q14974, Q92794, P12956, Q92797, P14866, Q9UMS4, O75533, P09874, P51610, P78527, Q96D46, Q13547, O00267, P52292,…	501	882	12782	2.1984	4.41599e-08	4.01454e-09	1.37134e-07
GOTERM_BP_FAT	GO:0006886~intracellular protein transport	45	7.22311	1.25015e-10	O00170, P55735, Q14974, P55060, Q9UIA9, P27797, P35606, O14617, P31946, P61981, P53621, P27348, O95373, Q9Y678, P49792, P52292, P62826, Q9HAV4, Q00610, P55072, P12004, P63104, O00629, Q16543, P52294, Q92973, Q9UJY4, Q8TEX9, Q7Z3T8, Q96P70, P38646, P06748, O76094, O60684, Q9UBF2, P62258, O14980, Q04917, P48444, Q10567, O95782, P35658, P63241, O00410, P53618	543	374	13528	2.99761	2.8966e-07	7.24151e-08	2.18633e-07
GOTERM_BP_FAT	GO:0043038~amino acid activation	16	2.56822	1.473e-10	P56192, P49588, P14868, P26639, P47897, P41252, P54577, P41250, P54136, Q6PI48, O43776, P07814, P12081, Q9P2J5, Q9NSD9, P49591	543	46	13528	8.66555	3.41295e-07	6.82591e-08	2.57607e-07
GOTERM_BP_FAT	GO:0006418~tRNA aminoacylation for protein translation	16	2.56822	1.473e-10	P56192, P49588, P14868, P26639, P47897, P41252, P54577, P41250, P54136, Q6PI48, O43776, P07814, P12081, Q9P2J5, Q9NSD9, P49591	543	46	13528	8.66555	3.41295e-07	6.82591e-08	2.57607e-07
GOTERM_BP_FAT	GO:0043039~tRNA aminoacylation	16	2.56822	1.473e-10	P56192, P49588, P14868, P26639, P47897, P41252, P54577, P41250, P54136, Q6PI48, O43776, P07814, P12081, Q9P2J5, Q9NSD9, P49591	543	46	13528	8.66555	3.41295e-07	6.82591e-08	2.57607e-07
SP_PIR_KEYWORDS	mrna splicing	29	4.6549	1.92912e-10	P52597, O75533, Q9UMS4, Q15029, Q9UQ35, P31943, P23246, Q9BWF3, O43390, O00148, Q6P2Q9, P38919, Q00839, A6NLN1, O60506, Q9Y3F4, O94906, P22626, P51991, O75643, Q13838, O43172, Q9UNY4, Q8NI27, P51816, Q15393, P61326, Q15459, Q5T6W2	623	209	19235	4.28406	9.31763e-08	7.76469e-09	2.76449e-07
GOTERM_BP_FAT	GO:0034613~cellular protein localization	47	7.54414	2.48252e-10	O00170, P55735, Q14974, P60953, P55060, Q9UIA9, P27797, P35606, O14617, P31946, P61981, P53621, P27348, O95373, Q9Y678, P49792, P52292, P62826, Q9HAV4, Q00610, P55072, P12004, Q5HY54, P63104, O00629, Q16543, P52294, Q92973, Q9UJY4, Q8TEX9, Q7Z3T8, Q96P70, P38646, P06748, O76094, O60684, Q9UBF2, P62258, O14980, Q04917, P48444, Q10567, O95782, P35658, P63241, O00410, P53618	543	411	13528	2.84898	5.75199e-07	9.58665e-08	4.34155e-07
GOTERM_BP_FAT	GO:0016071~mRNA metabolic process	44	7.0626	3.0188e-10	Q9H361, O14744, P52597, P14866, Q9UMS4, O75533, Q15029, Q9UQ35, P31943, P23246, Q15717, Q9BWF3, Q08211, P05455, P13489, O00148, O43390, Q6P2Q9, P38919, Q00839, Q92900, A6NLN1, O60506, Q13151, Q10570, Q9Y3F4, O94906, O75643, P22626, P51991, Q9NZI8, O43172, Q13838, P55795, Q92499, Q9UNY4, Q8NI27, Q12996, Q15393, P61326, Q15459, Q15366, Q15365, Q5T6W2	543	370	13528	2.96268	6.99456e-07	9.99223e-08	5.27943e-07
GOTERM_BP_FAT	GO:0070727~cellular macromolecule localization	47	7.54414	3.17124e-10	O00170, P55735, Q14974, P60953, P55060, Q9UIA9, P27797, P35606, O14617, P31946, P61981, P53621, P27348, O95373, Q9Y678, P49792, P52292, P62826, Q9HAV4, Q00610, P55072, P12004, Q5HY54, P63104, O00629, Q16543, P52294, Q92973, Q9UJY4, Q8TEX9, Q7Z3T8, Q96P70, P38646, P06748, O76094, O60684, Q9UBF2, P62258, O14980, Q04917, P48444, Q10567, O95782, P35658, P63241, O00410, P53618	543	414	13528	2.82834	7.34777e-07	9.18472e-08	5.54603e-07
SP_PIR_KEYWORDS	ligase	35	5.61798	3.51274e-10	P17812, Q9C0C9, P56192, P14868, P47897, P30520, O95573, P49915, P54136, Q96RQ3, P05165, Q9HCC0, P22102, P08243, O75592, Q9UBT2, P11498, P49588, Q5T4S7, P22314, P26639, P41252, Q15751, P54577, P41250, Q7Z6Z7, Q6PI48, Q13085, O43776, P07814, P12081, Q9P2J5, Q9NSD9, O00763, P49591	623	305	19235	3.54301	1.69665e-07	1.30512e-08	5.03389e-07
SP_PIR_KEYWORDS	mrna processing	32	5.13644	4.04301e-10	P52597, Q92797, Q9UMS4, O75533, Q15029, Q9UQ35, P31943, P23246, Q9BWF3, O43390, O00148, Q6P2Q9, P38919, Q00839, A6NLN1, O60506, Q10570, Q9Y3F4, O94906, P22626, P51991, O75643, Q13838, O43172, Q9UNY4, Q8NI27, P51816, Q12996, Q15393, P61326, Q15459, Q5T6W2	623	260	19235	3.79998	1.95277e-07	1.39484e-08	5.79378e-07
KEGG_PATHWAY	hsa00970:Aminoacyl-tRNA biosynthesis	16	2.56822	5.48715e-10	P56192, P49588, P14868, P26639, P47897, P41252, P54577, P41250, P54136, Q6PI48, O43776, P07814, P12081, Q9P2J5, Q9NSD9, P49591	261	41	5085	7.60303	7.73688e-08	7.73688e-08	6.48237e-07
UP_SEQ_FEATURE	domain:RRM 2	20	3.21027	5.61062e-10	Q9H361, Q13151, P52597, P51991, P22626, P14866, Q9NZI8, P31943, P23246, Q15717, P55795, Q15020, Q9BWF3, O43390, P43243, O43719, O00425, P19338, A6NLN1, O60506	623	101	19113	6.07504	1.29044e-06	1.29044e-07	9.80384e-07
UP_SEQ_FEATURE	domain:RRM 1	20	3.21027	5.61062e-10	Q9H361, Q13151, P52597, P51991, P22626, P14866, Q9NZI8, P31943, P23246, Q15717, P55795, Q15020, Q9BWF3, O43390, P43243, O43719, O00425, P19338, A6NLN1, O60506	623	101	19113	6.07504	1.29044e-06	1.29044e-07	9.80384e-07
GOTERM_MF_FAT	GO:0051082~unfolded protein binding	23	3.69181	9.05659e-10	Q15185, O00170, Q16543, P31689, P40227, P27824, P17987, P27797, Q58FG1, Q9Y230, P50454, P38646, P06748, Q99832, P53621, P62937, Q9NYU2, P14625, Q99733, P10809, Q9NU22, P50990, P50991	524	115	12983	4.95534	6.84678e-07	6.22435e-08	1.37986e-06
UP_SEQ_FEATURE	region of interest:Triple-helical region	11	1.76565	9.6793e-10	Q02388, P25940, P12110, P02458, P08572, P02452, P12107, A6NMZ7, Q9UMD9, P02461, P02462	623	23	19113	14.6726	2.22624e-06	2.02385e-07	1.69133e-06
SP_PIR_KEYWORDS	host-virus interaction	33	5.29695	9.74039e-10	Q16531, Q14974, Q07021, P51610, O43432, P61221, Q13547, Q7KZF4, O95373, P08670, P52292, P62826, Q9UKL0, O60506, P52294, Q92973, Q09472, Q5T4S7, Q8WUM4, P05388, Q93009, P06748, P28074, P62937, P10809, P62258, O14980, Q86UT6, P49721, P53618, Q5T6W2, O00410	623	285	19235	3.57498	4.7046e-07	3.1364e-08	1.39583e-06
SP_PIR_KEYWORDS	isopeptide bond	35	5.61798	1.15246e-09	P35520, Q14974, P52597, O60610, Q96KK5, P16615, Q13547, Q09028, P22392, P49792, P50990, P47914, O75081, Q13618, P62826, O43707, Q9NR48, Q5TB80, P12004, P23396, O60506, O75643, P26639, P46060, P06748, Q8N0X7, Q3KQU3, P15531, Q13347, P62937, P51665, Q99798, P13797, P62191, Q5T6W2, Q9Y623	623	319	19235	3.38752	5.56639e-07	3.47899e-08	1.65152e-06
GOTERM_CC_FAT	GO:0005681~spliceosome	24	3.85233	1.44256e-09	P52597, Q9Y3F4, O94906, P51991, P22626, O75643, Q9BZZ5, O75533, Q9UMS4, Q15029, Q9UQ35, P31943, Q13838, O43172, Q9UNY4, O43390, Q15393, Q6P2Q9, P38919, Q00839, P61326, Q15459, O60506, Q5T6W2	501	132	12782	4.63872	6.6069e-07	5.50575e-08	2.0517e-06
UP_SEQ_FEATURE	cross-link:Glycyl lysine isopeptide (Lys-Gly) (interchain with G-Cter in ubiquitin)	27	4.33387	1.69836e-09	Q14974, O60610, Q96KK5, P16615, Q09028, P22392, P50990, P62826, O75081, P47914, O43707, Q9NR48, Q5TB80, P12004, P23396, O60506, P26639, Q8N0X7, P15531, Q3KQU3, P62937, Q13347, P51665, Q99798, P13797, P62191, Q5T6W2, Q9Y623	623	199	19113	4.16247	3.90622e-06	3.25519e-07	2.96767e-06
GOTERM_BP_FAT	GO:0008104~protein localization	74	11.878	1.9531e-09	P62820, P55735, P61204, P55060, O14617, P31946, P49321, P53621, P49792, O15078, Q8N1F7, Q9HAV4, P62826, O43707, Q5HY54, O00629, Q16543, P52294, Q8WUM0, Q9Y490, Q92973, Q9UJY4, Q8WUM4, Q8TEX9, Q96P70, O75369, P49454, P35579, P06748, P38646, O76094, O60684, Q9P2E9, Q9UBF2, P62258, Q9BV73, Q10567, O95782, P31150, O60518, P63241, O00410, O00170, Q14974, P60953, Q9UIA9, P27797, P35606, P61981, Q96D46,…	543	882	13528	2.09024	4.52532e-06	5.02814e-07	3.41568e-06
GOTERM_BP_FAT	GO:0006913~nucleocytoplasmic transport	26	4.17335	2.84768e-09	Q14974, P55060, Q9UIA9, P27797, O95373, P49792, P52292, O00148, Q9HAV4, P62826, Q92900, O00629, P52294, Q8WUM0, Q92973, Q8TEX9, Q96P70, P06748, P38646, Q13838, O60684, O14980, Q8NI27, P35658, P63241, O00410	543	156	13528	4.15224	6.59806e-06	6.59808e-07	4.98017e-06
GOTERM_BP_FAT	GO:0045184~establishment of protein localization	67	10.7544	3.00625e-09	P62820, P55735, P61204, P55060, O14617, P31946, P49321, P53621, P49792, O15078, Q8N1F7, Q9HAV4, P62826, O43707, Q5HY54, O00629, Q16543, P52294, Q8WUM0, Q92973, Q9UJY4, Q8WUM4, Q8TEX9, Q96P70, P49454, P35579, P06748, P38646, O76094, O60684, Q9UBF2, Q9P2E9, P62258, O95782, Q10567, P31150, O60518, P63241, O00410, O00170, Q14974, Q9UIA9, P27797, P35606, P61981, Q96D46, O95373, P27348, P14625, Q9Y678,…	543	769	13528	2.17061	6.96546e-06	6.33225e-07	5.25748e-06
UP_SEQ_FEATURE	domain:Importin N-terminal	9	1.44462	3.03943e-09	O95373, Q14974, Q92973, P55060, Q9UIA9, O14980, Q8TEX9, Q96P70, O00410	623	14	19113	19.7222	6.99068e-06	5.37746e-07	5.31103e-06
SP_PIR_KEYWORDS	ATP	29	4.6549	3.17624e-09	P56192, Q01813, P14868, P31153, P16615, Q92841, P17858, P61221, P33176, P53350, Q08211, P38919, Q00839, P05023, Q8NEV1, P35749, Q9NR30, P26639, P41250, P52732, P19367, P60842, P07814, P00558, Q14204, Q7Z406, P10809, P12081, P11802	623	236	19235	3.79394	1.53412e-06	9.02425e-08	4.55166e-06
GOTERM_CC_FAT	GO:0030530~heterogeneous nuclear ribonucleoprotein complex	10	1.60514	3.6703e-09	P55795, Q13151, P52597, P22626, P14866, O43390, P31943, Q00839, A6NLN1, Q5T6W2	501	17	12782	15.0076	1.68099e-06	1.29307e-07	5.22015e-06
GOTERM_BP_FAT	GO:0051169~nuclear transport	26	4.17335	3.7328e-09	Q14974, P55060, Q9UIA9, P27797, O95373, P49792, P52292, O00148, Q9HAV4, P62826, Q92900, O00629, P52294, Q8WUM0, Q92973, Q8TEX9, Q96P70, P06748, P38646, Q13838, O60684, O14980, Q8NI27, P35658, P63241, O00410	543	158	13528	4.09968	8.64885e-06	7.2074e-07	6.5281e-06
GOTERM_BP_FAT	GO:0046907~intracellular transport	60	9.63082	4.27236e-09	P55735, P55060, O14617, P31946, P53621, P49792, O00148, P62826, Q9HAV4, Q5HY54, O00629, Q16543, P52294, Q8WUM0, Q92973, Q9UJY4, Q8TEX9, Q96P70, P35579, P06748, P38646, O76094, O60684, P35580, P42704, Q9UBF2, P62258, Q7Z406, Q8NI27, O95782, Q10567, P63241, O00410, O00170, Q14974, Q9UIA9, P27797, P35606, P61981, P16615, P33176, O95373, P27348, Q9Y678, P52292, Q00610, P12004, Q92900, P55072, P63104,…	543	657	13528	2.2752	9.89901e-06	7.61466e-07	7.47172e-06
INTERPRO	IPR008160:Collagen triple helix repeat	18	2.88925	4.73339e-09	Q86Y22, Q02388, P25940, P12110, Q5TAT6, P08572, P02452, Q8NFW1, A6NMZ7, P02461, Q9UMD9, P02462, Q9UEW3, Q2UY09, Q17RW2, P02458, Q14993, P12107	590	84	16659	6.05048	5.54279e-06	1.8476e-06	7.62903e-06
GOTERM_BP_FAT	GO:0015031~protein transport	66	10.5939	5.07678e-09	P62820, P55735, P61204, P55060, O14617, P31946, P49321, P53621, P49792, O15078, Q8N1F7, Q9HAV4, P62826, O43707, O00629, Q16543, P52294, Q8WUM0, Q92973, Q9UJY4, Q8WUM4, Q8TEX9, Q96P70, P49454, P35579, P06748, P38646, O76094, O60684, Q9UBF2, Q9P2E9, P62258, O95782, Q10567, P31150, O60518, P63241, O00410, O00170, Q14974, Q9UIA9, P27797, P35606, P61981, Q96D46, O95373, P27348, P14625, Q9Y678, P52292,…	543	762	13528	2.15786	1.17628e-05	8.40206e-07	8.87853e-06
GOTERM_BP_FAT	GO:0006396~RNA processing	53	8.50722	5.64601e-09	O14744, P52597, Q9Y2L1, P30153, Q99714, Q15029, Q9UQ35, P31943, P23246, Q08211, Q9BWF3, P05455, O00148, O43390, Q9UQ80, Q00839, P62263, O60506, Q13151, Q08J23, Q10570, Q9Y3F4, O94906, P49588, P22626, Q15020, P55795, Q9UNY4, P67775, Q8NI27, Q12996, Q15393, P49591, Q15459, Q15366, Q15365, Q5T6W2, P46777, P14866, Q9UMS4, O75533, Q92841, Q6P2Q9, P38919, A6NLN1, Q4G0J3, P51991, O75643, O43172, Q13838,…	543	547	13528	2.41392	1.30817e-05	8.7212e-07	9.87403e-06
GOTERM_BP_FAT	GO:0006397~mRNA processing	38	6.09952	6.86926e-09	O14744, P52597, P14866, Q9UMS4, O75533, Q15029, Q9UQ35, P31943, P23246, Q9BWF3, Q08211, O43390, O00148, Q6P2Q9, P38919, Q00839, A6NLN1, O60506, Q13151, Q10570, Q9Y3F4, O94906, O75643, P22626, P51991, Q13838, O43172, P55795, Q92499, Q9UNY4, Q8NI27, Q12996, Q15393, P61326, Q15459, Q15366, Q15365, Q5T6W2	543	321	13528	2.94926	1.59159e-05	9.94754e-07	1.20133e-05
SP_PIR_KEYWORDS	protein transport	43	6.90209	7.41051e-09	P62820, P61204, P55735, Q14974, P55060, Q9UIA9, P35606, O14617, Q96D46, P49321, P53621, O95373, Q9Y678, O15078, P49792, P52292, Q8N1F7, P62826, Q9HAV4, O43707, O00629, P52294, Q8WUM0, Q92973, Q6IQ22, Q9UJY4, Q8WUM4, Q8TEX9, Q96P70, Q99698, Q5SRE5, O60684, Q9UBF2, Q9P2E9, O14980, P48444, Q10567, O95782, O60518, P35658, P63241, O00410, P53618	623	485	19235	2.73735	3.57927e-06	1.98849e-07	1.06195e-05
GOTERM_CC_FAT	GO:0042470~melanosome	19	3.04976	7.82161e-09	P27824, Q8WUM4, P49327, P30086, P31946, P08133, Q15084, Q7KZF4, Q14697, P14625, P62258, P07237, Q00610, P62826, P50991, P05023, Q06830, P35749, P63104	501	89	12782	5.44659	3.58229e-06	2.55878e-07	1.11244e-05
GOTERM_CC_FAT	GO:0048770~pigment granule	19	3.04976	7.82161e-09	P27824, Q8WUM4, P49327, P30086, P31946, P08133, Q15084, Q7KZF4, Q14697, P14625, P62258, P07237, Q00610, P62826, P50991, P05023, Q06830, P35749, P63104	501	89	12782	5.44659	3.58229e-06	2.55878e-07	1.11244e-05
UP_SEQ_FEATURE	site:Interaction with phosphoserine on interacting protein	7	1.1236	7.8983e-09	P27348, P62258, P31947, Q04917, P31946, P61981, P63104	623	7	19113	30.679	1.81659e-05	1.29758e-06	1.38013e-05
SP_PIR_KEYWORDS	collagen	18	2.88925	9.13807e-09	Q86Y22, Q02388, P25940, P12110, Q5TAT6, P08572, P02452, Q8NFW1, A6NMZ7, P02461, Q9UMD9, P02462, Q9UEW3, Q2UY09, Q17RW2, P02458, Q14993, P12107	623	95	19235	5.84996	4.41368e-06	2.32299e-07	1.30952e-05
SMART	SM00101:14_3_3	7	1.1236	1.02793e-08	P27348, P62258, P31947, Q04917, P31946, P61981, P63104	311	7	9079	29.1929	2.12781e-06	2.12781e-06	1.29566e-05
GOTERM_BP_FAT	GO:0007049~cell cycle	66	10.5939	1.04497e-08	Q12906, Q13200, P52701, Q99460, O43175, O15355, P62136, P49321, Q96PY6, P53350, Q09028, Q13564, Q9UQ80, P62826, Q13618, Q6NT89, Q9Y265, Q9Y266, Q5TB80, O95359, Q14566, Q9BPX3, Q92878, Q8WUM4, Q7Z7A1, P52732, P49454, P35579, Q2NKX8, P06748, P28074, Q15021, P35580, Q9BV73, Q8TD19, Q15008, Q9P287, P51665, O95613, P62191, Q9UJX3, P43686, P27797, P51610, O00267, P52292, P49736, Q9P258, Q92900, O14578,…	543	776	13528	2.11893	2.42118e-05	1.42424e-06	1.8275e-05
INTERPRO	IPR001494:Importin-beta, N-terminal	9	1.44462	1.20391e-08	O95373, Q14974, Q92973, P55060, Q9UIA9, O14980, Q8TEX9, Q96P70, O00410	590	15	16659	16.9414	1.40977e-05	3.52445e-06	1.9404e-05
INTERPRO	IPR000308:14-3-3 protein	7	1.1236	1.29408e-08	P27348, P62258, P31947, Q04917, P31946, P61981, P63104	590	7	16659	28.2356	1.51536e-05	3.03073e-06	2.08573e-05
GOTERM_BP_FAT	GO:0006403~RNA localization	20	3.21027	1.33298e-08	Q8WUM0, P22626, Q9UIA9, Q14008, Q9NZI8, P06748, Q13838, Q5SRE5, P42704, P49792, O14980, Q8NI27, Q8N1F7, O00148, P62826, P38919, P61326, Q92900, P35658, P63241	543	100	13528	4.98269	3.08846e-05	1.71584e-06	2.33118e-05
GOTERM_CC_FAT	GO:0044427~chromosomal part	41	6.58106	1.73513e-08	Q15185, P55735, P52701, Q12873, Q92794, Q92769, P12956, Q96KK5, Q13185, P49643, Q13547, Q09028, P42166, P49736, P62826, Q9P258, Q92900, P12004, Q8NEV1, Q13263, Q9BPX3, Q8WUM0, Q9Y6D9, Q92878, Q8TAQ2, P46100, Q12888, P17987, Q29RF7, P18754, P46060, P49454, Q2NKX8, P25205, P33993, Q15021, O95347, O14980, P67775, Q9Y232, Q13127	501	386	12782	2.70993	7.94687e-06	5.29794e-07	2.46782e-05
GOTERM_CC_FAT	GO:0005759~mitochondrial matrix	30	4.81541	1.86156e-08	P24752, P00367, P47897, Q07021, P00505, Q8N163, P09622, P30837, P05091, Q96RQ3, P05165, Q9HCC0, P51398, P13804, P11498, P40926, P49411, P34897, P41250, P38646, P04181, Q6PI48, P11177, P42704, P10809, P30084, P40939, P25705, P07954, Q99798	501	227	12782	3.37176	8.52591e-06	5.32871e-07	2.64764e-05
GOTERM_CC_FAT	GO:0031980~mitochondrial lumen	30	4.81541	1.86156e-08	P24752, P00367, P47897, Q07021, P00505, Q8N163, P09622, P30837, P05091, Q96RQ3, P05165, Q9HCC0, P51398, P13804, P11498, P40926, P49411, P34897, P41250, P38646, P04181, Q6PI48, P11177, P42704, P10809, P30084, P40939, P25705, P07954, Q99798	501	227	12782	3.37176	8.52591e-06	5.32871e-07	2.64764e-05
GOTERM_BP_FAT	GO:0006096~glycolysis	14	2.24719	2.38921e-08	P60174, Q01813, P40926, P18669, P04075, P06733, P00338, P19367, P17858, P11177, P00558, P10155, P14618, P09104	543	47	13528	7.42103	5.53564e-05	2.91357e-06	4.17836e-05
GOTERM_CC_FAT	GO:0031967~organelle envelope	55	8.82825	2.39517e-08	P24752, Q8IVL0, P55735, Q14573, P36551, P55060, Q13185, Q99714, P37802, P49792, Q8WXH0, P42166, Q8N1F7, P62826, P11498, O00629, P52294, Q8WUM0, P40926, Q92973, Q8TEX9, Q96P70, P49454, O60684, P42704, P10809, Q86UT6, P56537, P63241, O00410, Q9Y277, Q14974, Q9UIA9, O95573, P00505, P30086, P09874, Q96RQ3, O95373, P52292, O00429, P12004, Q9BYT8, Q9Y6D9, P46060, P34897, P54886, P19367, Q5SRE5, P31930,…	501	620	12782	2.26325	1.09698e-05	6.45286e-07	3.40657e-05
GOTERM_CC_FAT	GO:0031975~envelope	55	8.82825	2.63758e-08	P24752, Q8IVL0, P55735, Q14573, P36551, P55060, Q13185, Q99714, P37802, P49792, Q8WXH0, P42166, Q8N1F7, P62826, P11498, O00629, P52294, Q8WUM0, P40926, Q92973, Q8TEX9, Q96P70, P49454, O60684, P42704, P10809, Q86UT6, P56537, P63241, O00410, Q9Y277, Q14974, Q9UIA9, O95573, P00505, P30086, P09874, Q96RQ3, O95373, P52292, O00429, P12004, Q9BYT8, Q9Y6D9, P46060, P34897, P54886, P19367, Q5SRE5, P31930,…	501	622	12782	2.25597	1.208e-05	6.71117e-07	3.75135e-05
SP_PIR_KEYWORDS	ubl conjugation	47	7.54414	3.24738e-08	Q16531, P35520, O75155, P52597, Q14974, O60610, Q9Y295, P26358, Q14160, Q96KK5, P16615, Q13547, Q09028, P22392, P49792, P50990, P47914, O75081, Q13618, P62826, Q6NT89, O43707, Q9NR48, P23396, Q5TB80, P12004, O60506, Q16543, Q09472, O75643, Q9UJY4, P26639, P46060, Q93009, P06748, Q8N0X7, Q3KQU3, P15531, Q13347, P62937, P51665, P78347, Q99798, P13797, P62191, Q5T6W2, Q9Y623	623	588	19235	2.46788	1.56847e-05	7.84242e-07	4.65361e-05
UP_SEQ_FEATURE	mutagenesis site	112	17.9775	3.62958e-08	P46940, Q16531, P35520, Q9NX46, P00367, P52597, P52701, P35527, O00291, P49792, O14654, Q13564, Q08J23, Q92878, P41250, Q2NKX8, Q93009, P28074, P67775, Q8TD19, P63241, Q96G74, Q14974, P60953, P26358, Q92794, Q8IWJ2, Q14160, Q8N163, P09874, P11766, O43432, P30041, O00267, P30044, P22392, Q9Y678, P08243, Q06124, P49736, O75081, Q6P2Q9, P55072, Q92900, Q4J6C6, P63104, Q7Z7L7, Q9P212, Q4G0J3, P30419,…	623	2045	19113	1.68022	8.34767e-05	5.56533e-06	6.34222e-05
GOTERM_BP_FAT	GO:0006605~protein targeting	29	4.6549	3.63374e-08	O00170, Q14974, P55060, Q9UIA9, P27797, P31946, P61981, P27348, O95373, P49792, P52292, Q9HAV4, P62826, P63104, O00629, P52294, Q16543, Q92973, Q8TEX9, Q7Z3T8, Q96P70, P38646, O76094, O60684, P62258, O14980, P35658, P63241, O00410	543	215	13528	3.36042	8.41902e-05	4.20968e-06	6.35486e-05
GOTERM_CC_FAT	GO:0005730~nucleolus	59	9.4703	3.77174e-08	P46940, Q12906, Q13045, P35520, Q14573, P52597, Q9H0A0, Q9BVP2, Q9Y2L1, Q7LBC6, P31943, P32969, Q9BWF3, Q08211, P05455, Q9UQ80, O95163, Q13428, O43707, P62263, P15880, Q08J23, P22626, P06748, P55795, P19338, P62191, Q15459, P56537, Q5T6W2, O00410, Q9Y4W2, P46777, Q9BQ67, Q02790, P54136, P09874, Q2NL82, Q96D46, P12814, O75081, Q9P258, Q9UHB9, P55072, A6NLN1, P46781, Q9NR30, Q09472, Q8TAQ2, P51991,…	501	698	12782	2.15654	1.72744e-05	9.09188e-07	5.36443e-05
GOTERM_BP_FAT	GO:0006457~protein folding	26	4.17335	3.92334e-08	O00170, P31689, P40227, Q02790, P27797, Q58FG1, Q9Y230, Q99832, P53621, P14625, P49792, P50990, O95433, P50991, Q5T1M5, P27824, P49588, P17987, Q86VQ3, Q08752, P38646, P62937, Q15084, Q99615, Q9NYU2, P10809	543	177	13528	3.6596	9.08997e-05	4.32874e-06	6.86134e-05
PIR_SUPERFAMILY	PIRSF000868:14-3-3	7	1.1236	4.07332e-08	P27348, P62258, P31947, Q04917, P31946, P61981, P63104	319	7	7396	23.185	1.32789e-05	1.32789e-05	5.51212e-05
PIR_SUPERFAMILY	PIRSF000868:14-3-3 protein	7	1.1236	4.07332e-08	P27348, P62258, P31947, Q04917, P31946, P61981, P63104	319	7	7396	23.185	1.32789e-05	1.32789e-05	5.51212e-05
SP_PIR_KEYWORDS	Chaperone	22	3.5313	4.15848e-08	Q15185, Q16543, P31689, P40227, P27824, P17987, P27797, Q58FG1, P50454, P38646, P06748, Q99832, P61221, Q99615, P14625, P10809, Q9NU22, P07237, P50990, P50991, O95433, Q9H3U1	623	158	19235	4.29902	2.00853e-05	9.56451e-07	5.95926e-05
GOTERM_BP_FAT	GO:0006007~glucose catabolic process	15	2.4077	4.63611e-08	P60174, Q01813, P40926, P18669, P04075, P06733, P00338, P19367, P17858, P11177, P00558, P52209, P09104, P10155, P14618	543	58	13528	6.44313	0.000107413	4.88266e-06	8.10786e-05
GOTERM_BP_FAT	GO:0050657~nucleic acid transport	19	3.04976	4.71946e-08	Q8WUM0, P22626, Q9UIA9, Q14008, P06748, Q13838, Q5SRE5, P42704, P49792, O14980, Q8NI27, Q8N1F7, O00148, P62826, P38919, P61326, Q92900, P35658, P63241	543	97	13528	4.87995	0.000109344	4.75434e-06	8.25364e-05
GOTERM_BP_FAT	GO:0051236~establishment of RNA localization	19	3.04976	4.71946e-08	Q8WUM0, P22626, Q9UIA9, Q14008, P06748, Q13838, Q5SRE5, P42704, P49792, O14980, Q8NI27, Q8N1F7, O00148, P62826, P38919, P61326, Q92900, P35658, P63241	543	97	13528	4.87995	0.000109344	4.75434e-06	8.25364e-05
GOTERM_BP_FAT	GO:0050658~RNA transport	19	3.04976	4.71946e-08	Q8WUM0, P22626, Q9UIA9, Q14008, P06748, Q13838, Q5SRE5, P42704, P49792, O14980, Q8NI27, Q8N1F7, O00148, P62826, P38919, P61326, Q92900, P35658, P63241	543	97	13528	4.87995	0.000109344	4.75434e-06	8.25364e-05
GOTERM_MF_FAT	GO:0008565~protein transporter activity	18	2.88925	5.402e-08	O00629, P52294, Q14974, Q92973, P55060, Q9UIA9, Q8TEX9, Q7Z3T8, O14617, Q96P70, O60684, O95373, O14980, P52292, Q10567, Q9HAV4, O95782, O00410	524	87	12983	5.12622	4.08383e-05	3.40325e-06	8.23044e-05
SP_PIR_KEYWORDS	ribosome	15	2.4077	7.5167e-08	P15880, P46783, P36578, P46777, P05386, P05388, P32969, P62424, Q02878, P47914, P23396, P62263, P26373, P46781, P62701	623	73	19235	6.34414	3.6305e-05	1.65026e-06	0.000107717
GOTERM_CC_FAT	GO:0005694~chromosome	44	7.0626	1.00932e-07	Q15185, A6NHR9, P55735, P52701, Q12873, Q92794, Q92769, P12956, Q96KK5, Q13185, P49643, Q13547, Q09028, P42166, P49736, P62826, Q9P258, Q92900, P12004, Q8NEV1, Q13263, Q9BPX3, Q8WUM0, Q9Y6D9, Q92878, Q8TAQ2, P46100, Q12888, P17987, Q29RF7, P18754, P46060, P49454, Q2NKX8, P25205, P33993, Q15021, P42704, O95347, Q9Y232, O14980, Q9UPV0, P67775, Q13127	501	460	12782	2.44037	4.62258e-05	2.31134e-06	0.000143552
GOTERM_BP_FAT	GO:0015931~nucleobase, nucleoside, nucleotide and nucleic acid transport	20	3.21027	1.04574e-07	Q8WUM0, P22626, Q9UIA9, Q14008, P06748, Q13838, Q5SRE5, P42704, P49792, O14980, Q8NI27, Q8N1F7, O00148, P62826, P38919, P61326, Q92900, P35658, P63241, Q9Y277	543	113	13528	4.40946	0.000242269	1.00957e-05	0.000182885
SP_PIR_KEYWORDS	glycolysis	12	1.92616	1.07519e-07	P60174, P11177, Q01813, P18669, P00558, P00338, P06733, P04075, P09104, P14618, P19367, P17858	623	44	19235	8.4204	5.19305e-05	2.2579e-06	0.000154079
GOTERM_CC_FAT	GO:0044445~cytosolic part	23	3.69181	1.07989e-07	P15880, P36578, P46783, P40227, Q01813, P46777, P05386, P17987, P05388, P06733, Q99832, P17858, P30044, P62424, P30048, Q02878, P09104, P47914, P50991, P23396, P62263, P46781, P62701	501	152	12782	3.86052	4.94579e-05	2.3552e-06	0.00015359
GOTERM_BP_FAT	GO:0000059~protein import into nucleus, docking	9	1.44462	1.11378e-07	O95373, Q14974, Q92973, P55060, Q9UIA9, O14980, Q8TEX9, Q96P70, O00410	543	17	13528	13.1895	0.00025803	1.03225e-05	0.000194784
SP_PIR_KEYWORDS	actin-binding	27	4.33387	1.35283e-07	Q13045, P18206, O60610, Q01518, O76041, Q9ULV4, O95425, O00291, Q9Y2K3, Q16643, P23528, O75369, P35579, P13535, P12814, P35580, Q15149, Q7Z406, Q8WXH0, O75083, O43707, P61158, Q5T1M5, P13797, P35749, Q5HY54, Q9Y623	623	247	19235	3.37498	6.53396e-05	2.72257e-06	0.000193865
SP_PIR_KEYWORDS	cell cycle	39	6.26003	1.40609e-07	Q9UJX3, P51610, P62136, P49321, Q96PY6, P53350, Q09028, Q13564, P49736, P62826, Q6NT89, Q9P258, Q9Y265, Q5TB80, Q9Y266, O14578, Q14566, Q9BPX3, Q9Y6D9, Q09472, Q92878, Q8WUM4, Q29RF7, P18754, Q14008, Q7Z7A1, Q5TZA2, P49454, P52732, Q2NKX8, P25205, P33993, Q15021, Q9BV73, O95347, Q8TD19, P11802, Q9UPV0, Q9P287	623	461	19235	2.61197	6.79117e-05	2.71656e-06	0.000201497
SP_PIR_KEYWORDS	coiled coil	108	17.3355	1.60253e-07	Q9HC10, O60610, Q9BVP2, Q9ULV4, P35527, O00291, Q8IWY7, Q8NCU4, Q9UQ35, P02461, Q4VCS5, O60292, P02462, P49321, P13645, P02458, Q9BYB0, Q8WXH0, Q9UKL0, Q02388, Q8IYY4, Q92878, P08572, P20930, Q9Y2K3, Q7Z7A1, O60282, Q15149, Q9BV73, Q8N1G4, Q8TD19, Q14993, Q14789, Q8TCG1, O60518, Q6ZS82, Q8IWJ2, Q14160, Q96N67, Q9ULI0, P35606, Q8N163, O43432, P48681, P50851, O75081, Q96T17, Q8IWI9, Q9BZ29, Q8IWB6,…	623	2019	19235	1.65155	7.73991e-05	2.977e-06	0.000229648
GOTERM_MF_FAT	GO:0004386~helicase activity	22	3.5313	1.85286e-07	Q9NR30, Q12873, P46100, P12956, O75643, O15523, Q9Y230, Q92841, Q2NKX8, P60842, Q13838, P33993, P33991, Q92499, Q08211, Q9UNY4, O00148, Q9BQ39, P38919, Q9Y265, Q92900, Q14566	524	140	12983	3.89348	0.000140067	1.07751e-05	0.000282301
KEGG_PATHWAY	hsa00010:Glycolysis / Gluconeogenesis	16	2.56822	1.90823e-07	P60174, Q01813, P18669, P04075, P06733, P00338, P11766, P09622, P19367, P30837, P17858, P05091, P11177, P00558, P09104, P14618	261	60	5085	5.1954	2.69056e-05	1.34529e-05	0.000225433
SP_PIR_KEYWORDS	P-loop	18	2.88925	1.93895e-07	P62820, Q9NR30, P61204, P60953, P49411, P31153, P52732, Q92841, P60842, P61221, P33176, Q08211, Q14204, O00429, P25705, P38919, Q00839, P41091	623	116	19235	4.79092	9.36471e-05	3.46857e-06	0.000277859
UP_SEQ_FEATURE	active site:Cysteine sulfenic acid (-SOH) intermediate	6	0.963082	2.09817e-07	P30041, P30044, P30048, P32119, Q13162, Q06830	623	6	19113	30.679	0.000482463	3.01607e-05	0.000366628
GOTERM_CC_FAT	GO:0005625~soluble fraction	34	5.45746	2.14002e-07	Q01581, P62820, Q01813, P14868, P30153, P30086, P06737, P11766, P54136, P17858, P53621, P27348, Q9H4A4, O95373, P22392, P08243, Q06124, P09104, P63104, P11498, P60174, P49588, P41252, P46060, Q04760, P54577, P41250, P15531, Q13085, O43776, P07814, P60891, Q9NSD9, P67775, P46821	501	313	12782	2.77138	9.80082e-05	4.45513e-06	0.000304368
GOTERM_BP_FAT	GO:0044275~cellular carbohydrate catabolic process	17	2.72873	2.14429e-07	P60174, Q01813, P40926, P18669, P04075, P06733, P00338, P06737, P19367, P17858, P11177, P00558, P52209, P09104, P11216, P10155, P14618	543	85	13528	4.98269	0.000496709	1.91088e-05	0.000375004
SP_PIR_KEYWORDS	multifunctional enzyme	14	2.24719	3.25594e-07	P11498, Q3LXA3, P49327, P54886, P31939, P11172, P30041, Q13085, P07814, P22102, P09960, O00763, P35573, P40939	623	70	19235	6.17496	0.00015725	5.61649e-06	0.000466587
SP_PIR_KEYWORDS	helicase	19	3.04976	3.26611e-07	Q9NR30, Q12873, P46100, P12956, O75643, O15523, Q9Y230, Q92841, Q2NKX8, P60842, Q13838, Q92499, Q08211, Q9UNY4, O00148, Q9BQ39, P38919, Q9Y265, Q92900	623	134	19235	4.37777	0.000157741	5.43976e-06	0.000468045
GOTERM_MF_FAT	GO:0005198~structural molecule activity	54	8.66774	3.27634e-07	P36578, O00291, P35527, Q8IWY7, P02461, P32969, P02462, P53621, P13645, P02458, P62424, P47914, P62263, P23396, P15880, Q9Y490, P08572, P20930, Q15149, P55795, Q9UBF2, Q02878, Q14993, P46821, P18206, P46777, O76041, P35606, P13535, P48681, Q9Y678, Q17RW2, P08670, Q00610, P35749, P62701, P46781, Q96T76, P25940, P12110, Q5TAT6, P05386, P05388, P02452, Q14152, Q8NFW1, Q5TZA2, Q9UI47, P12107, Q8TDM6,…	524	634	12983	2.11032	0.000247661	1.76921e-05	0.00049918
GOTERM_BP_FAT	GO:0034621~cellular macromolecular complex subunit organization	37	5.939	3.3285e-07	O14744, P34932, Q14974, O60610, P55060, Q92794, Q96KK5, Q02790, Q9UIA9, P27797, O00291, Q2NL82, P49321, Q13492, O95373, P49736, P62263, P35749, Q5HY54, Q8WUM0, Q92973, O94906, P17987, O75643, Q8TEX9, Q14152, Q96P70, P49454, P06748, Q92499, Q99733, Q9UNY4, P10809, O14980, Q15459, P56537, O00410	543	357	13528	2.58207	0.000770917	2.85631e-05	0.000582104
SP_PIR_KEYWORDS	triple helix	10	1.60514	3.88981e-07	Q02388, P12110, Q5TAT6, P02458, P08572, P02452, Q14993, P12107, P02461, P02462	623	31	19235	9.95961	0.00018786	6.26258e-06	0.000557423
SP_PIR_KEYWORDS	hydroxylysine	10	1.60514	3.88981e-07	Q02388, P12110, Q5TAT6, P02458, P08572, P02452, Q14993, P12107, P02461, P02462	623	31	19235	9.95961	0.00018786	6.26258e-06	0.000557423
UP_SEQ_FEATURE	repeat:HEAT 11	7	1.1236	4.66084e-07	Q5VYK3, O75155, Q92616, O75533, P30154, P30153, Q86VP6	623	11	19113	19.523	0.00107142	6.30565e-05	0.00081442
GOTERM_BP_FAT	GO:0019320~hexose catabolic process	15	2.4077	4.70767e-07	P60174, Q01813, P40926, P18669, P04075, P06733, P00338, P19367, P17858, P11177, P00558, P52209, P09104, P10155, P14618	543	69	13528	5.41597	0.00109017	3.89552e-05	0.000823298
GOTERM_BP_FAT	GO:0006414~translational elongation	18	2.88925	4.82795e-07	P15880, P36578, P46783, P46777, P49411, P05386, P05388, P32969, P26641, P55795, P62424, Q02878, P47914, P23396, P62263, P26373, P46781, P62701	543	101	13528	4.44002	0.00111801	3.8573e-05	0.000844334
SP_PIR_KEYWORDS	mitosis	22	3.5313	5.20954e-07	Q9BPX3, Q9UJX3, Q9Y6D9, Q29RF7, P18754, Q14008, P49454, P52732, Q2NKX8, Q96PY6, Q15021, P53350, Q14204, O95347, Q8TD19, Q9UPV0, P62826, Q9P258, Q9Y265, Q9Y266, Q5TB80, O14578	623	183	19235	3.71172	0.000251589	8.11676e-06	0.000746543
GOTERM_BP_FAT	GO:0034622~cellular macromolecular complex assembly	34	5.45746	5.40083e-07	O14744, P34932, Q14974, O60610, P55060, Q92794, Q96KK5, Q02790, Q9UIA9, P27797, O00291, Q2NL82, Q13492, O95373, P49736, P62263, P35749, Q5HY54, Q92973, O94906, P17987, O75643, Q8TEX9, Q14152, Q96P70, P49454, P06748, Q92499, Q99733, P10809, O14980, Q15459, P56537, O00410	543	318	13528	2.6637	0.00125059	4.17115e-05	0.00094452
GOTERM_BP_FAT	GO:0051168~nuclear export	14	2.24719	5.43824e-07	Q8WUM0, Q9UIA9, P27797, P06748, P38646, Q13838, O14980, Q8NI27, O00148, P62826, Q9HAV4, Q92900, P35658, P63241	543	60	13528	5.81314	0.00125925	4.06456e-05	0.000951062
GOTERM_CC_FAT	GO:0005581~collagen	11	1.76565	5.82682e-07	Q02388, P25940, Q5TAT6, Q17RW2, P02458, P08572, P02452, Q14993, P12107, P02461, P02462	501	35	12782	8.01836	0.000266833	1.16029e-05	0.000828728
GOTERM_MF_FAT	GO:0016887~ATPase activity	35	5.61798	6.36134e-07	P43686, P52701, Q12873, P12956, O15523, Q9Y230, P16615, Q92841, P61221, Q09028, Q08211, P38606, O00148, P50990, P38919, Q9Y265, P05023, P55072, Q92900, Q9NR30, O75643, P35579, P60842, Q13838, P35580, Q92499, Q14204, Q7Z406, Q9UNY4, P10809, Q9NU22, Q15008, P25705, Q9BQ39, P62191	524	334	12983	2.59636	0.000480802	3.20607e-05	0.000969205
GOTERM_CC_FAT	GO:0005852~eukaryotic translation initiation factor 3 complex	8	1.28411	6.58271e-07	Q13347, O15371, O75821, Q14152, O00303, Q99613, Q9Y262	501	15	12782	13.6069	0.000301443	1.25619e-05	0.000936233
SP_PIR_KEYWORDS	Initiation factor	12	1.92616	6.69489e-07	O43432, Q13347, O15371, O75821, Q14152, O00303, Q99613, P56537, P41091, P60842, Q9Y262	623	52	19235	7.12495	0.000323311	1.0105e-05	0.000959397
GOTERM_BP_FAT	GO:0022402~cell cycle process	49	7.86517	6.73097e-07	Q12906, Q9UJX3, P43686, Q13200, P52701, P27797, Q99460, O43175, O15355, Q96PY6, P53350, P52292, Q9UQ80, Q13618, P62826, Q9P258, Q9Y265, Q5TB80, Q9Y266, O95359, O14578, Q9BPX3, Q9Y6D9, Q92878, P18754, Q29RF7, Q96P48, Q14008, P52732, P49454, P35579, Q2NKX8, P06748, P28074, Q15021, P35580, Q14204, Q9BV73, O95347, P11802, Q8TD19, Q9UPV0, Q15008, P51665, P49721, O00231, O95613, P62191, O00232	543	565	13528	2.16063	0.00155835	4.87352e-05	0.00117714
GOTERM_BP_FAT	GO:0046365~monosaccharide catabolic process	15	2.4077	6.80859e-07	P60174, Q01813, P40926, P18669, P04075, P06733, P00338, P19367, P17858, P11177, P00558, P52209, P09104, P10155, P14618	543	71	13528	5.2634	0.00157631	4.78035e-05	0.00119071
UP_SEQ_FEATURE	repeat:HEAT 15	6	0.963082	7.14614e-07	Q5VYK3, O75155, Q92616, P30154, P30153, Q86VP6	623	7	19113	26.2963	0.00164226	9.13076e-05	0.00124869
SP_PIR_KEYWORDS	disease mutation	88	14.1252	8.03496e-07	P24752, P35520, Q9HC10, P00367, P36551, P52701, P35527, Q99714, P07741, Q02252, P06737, P11172, P02461, O43175, P02462, Q9HCC0, P13645, P02458, O15078, P35573, P13804, O95163, Q13428, O43707, Q5HY54, Q7Z494, Q02388, P11498, P49411, P22314, P41250, P54577, O75369, P35579, P04181, Q6PI48, P11177, Q15149, Q15020, P42704, Q7Z406, P10809, P00558, P31150, P00918, P18206, P46777, Q96RW7, O76041, P04075,…	623	1591	19235	1.70772	0.000388013	1.17602e-05	0.00115143
GOTERM_BP_FAT	GO:0043933~macromolecular complex subunit organization	57	9.14928	8.54697e-07	O14744, Q14573, O60610, P55060, Q96KK5, O00291, P30153, Q99714, P14174, P31946, P17858, P49321, O95163, P08758, P62263, Q5HY54, Q8WUM0, Q92973, O94906, P17987, Q8TEX9, Q96P70, P49454, P06748, P23921, Q99733, P10809, Q9UNY4, Q9NU22, Q15393, Q15459, P56537, O00410, O95996, P34932, Q01813, Q14974, Q92794, P14868, Q9UIA9, Q02790, P27797, P30086, Q2NL82, Q13492, O95373, P49736, P55072, P35749, O75643,…	543	710	13528	2.00009	0.00197837	5.82434e-05	0.00149473
INTERPRO	IPR006195:Aminoacyl-tRNA synthetase, class II, conserved region	8	1.28411	9.51782e-07	O43776, P07814, P14868, P26639, P12081, P41250, P49591, Q6PI48	590	17	16659	13.2873	0.00111392	0.000185739	0.00153402
GOTERM_BP_FAT	GO:0006399~tRNA metabolic process	19	3.04976	1.00776e-06	P56192, Q08J23, P49588, P14868, P26639, P47897, P41252, Q99714, P41250, P54577, P54136, Q6PI48, O43776, P07814, P05455, P12081, Q9P2J5, Q9NSD9, P49591	543	118	13528	4.01149	0.00233227	6.67118e-05	0.00176242
SP_PIR_KEYWORDS	trimer	9	1.44462	1.06628e-06	Q02388, P12110, Q5TAT6, P02458, P02452, Q14993, P12107, P02461, P02462	623	26	19235	10.6874	0.00051488	1.51473e-05	0.00152801
INTERPRO	IPR000866:Alkyl hydroperoxide reductase/ Thiol specific antioxidant/ Mal allergen	6	0.963082	1.07565e-06	P30041, P30044, P30048, P32119, Q13162, Q06830	590	7	16659	24.2019	0.00125879	0.000179924	0.00173366
UP_SEQ_FEATURE	repeat:1-2	9	1.44462	1.11823e-06	P55795, P27824, P22314, P48634, P27797, P31943, P49454, Q5T6W2, O60506	623	26	19113	10.6196	0.00256863	0.000135356	0.00195395
GOTERM_BP_FAT	GO:0065003~macromolecular complex assembly	54	8.66774	1.24324e-06	O14744, Q14573, O60610, P55060, Q96KK5, O00291, P30153, Q99714, P14174, P31946, P17858, O95163, P08758, P62263, Q5HY54, Q92973, O94906, P17987, Q8TEX9, Q96P70, P49454, P06748, P23921, Q99733, P10809, Q9NU22, Q15393, Q15459, P56537, O00410, O95996, P34932, Q01813, Q14974, Q92794, P14868, Q9UIA9, Q02790, P27797, P30086, Q2NL82, Q13492, O95373, P49736, P55072, P35749, O75643, Q14152, Q92499, P07814,…	543	665	13528	2.02305	0.00287645	8.00134e-05	0.00217423
UP_SEQ_FEATURE	repeat:1-1	9	1.44462	1.54394e-06	P55795, P27824, P22314, P48634, P27797, P31943, P49454, Q5T6W2, O60506	623	27	19113	10.2263	0.00354478	0.000177538	0.00269781
SP_PIR_KEYWORDS	cell division	26	4.17335	1.70109e-06	Q9UJX3, P60953, P62136, Q96PY6, P53350, P62826, Q9P258, Q9Y265, Q5TB80, Q9Y266, O14578, Q9BPX3, Q9Y6D9, Q8WUM4, Q29RF7, P18754, Q7Z7A1, Q14008, P49454, P52732, Q2NKX8, Q15021, O95347, Q8TD19, P11802, Q9UPV0	623	264	19235	3.0407	0.000821289	2.34748e-05	0.00243769
GOTERM_MF_FAT	GO:0008135~translation factor activity, nucleic acid binding	17	2.72873	1.70252e-06	P49411, P35716, O75821, Q92616, Q14152, P60842, Q9Y262, O43432, Q13347, P26641, O15371, O00303, Q99613, P56537, P63241, P41091	524	98	12983	4.298	0.00128628	8.04409e-05	0.00259392
SP_PIR_KEYWORDS	RNA binding	9	1.44462	2.00334e-06	P05455, P22626, P05388, P38919, Q15366, P19338, Q92841, Q5T6W2, P60842	623	28	19235	9.92404	0.000967144	2.68777e-05	0.00287081
SP_PIR_KEYWORDS	hydroxyproline	10	1.60514	2.01794e-06	Q02388, P12110, Q5TAT6, P02458, P08572, P02452, Q14993, P12107, P02461, P02462	623	37	19235	8.34454	0.00097419	2.6342e-05	0.00289174
GOTERM_MF_FAT	GO:0016885~ligase activity, forming carbon-carbon bonds	6	0.963082	2.04405e-06	P11498, P05165, Q9HCC0, Q13085, O00763, Q96RQ3	524	7	12983	21.2372	0.00154411	9.0896e-05	0.00311425
GOTERM_BP_FAT	GO:0000278~mitotic cell cycle	36	5.77849	2.16157e-06	Q9UJX3, P43686, Q13200, Q99460, Q96PY6, P53350, P52292, Q13618, P62826, Q9P258, Q9Y265, Q9Y266, Q5TB80, O14578, Q9BPX3, Q9Y6D9, Q29RF7, P18754, Q14008, P49454, P52732, Q2NKX8, P28074, Q15021, Q14204, Q9BV73, O95347, Q8TD19, P11802, Q9UPV0, Q15008, P51665, O00231, P49721, P62191, O00232	543	370	13528	2.42401	0.00499585	0.000135352	0.0037802
GOTERM_CC_FAT	GO:0005856~cytoskeleton	89	14.2857	2.17008e-06	P46940, Q13045, Q5VYK3, O60610, O95425, Q9ULV4, P35527, Q13185, O00291, P30153, Q8IWY7, P31943, P23528, Q4VCS5, P53350, Q08211, P13645, O15078, Q9BYB0, Q8WXH0, O75592, O43707, Q5T1M5, Q9Y265, Q5TB80, Q9Y266, O95359, Q5HY54, Q7Z494, Q9Y490, Q5T4S7, P17987, P20930, Q8WUM4, Q9Y2K3, O60907, Q7Z7A1, O60282, Q16643, O75369, P52732, P49454, P35579, P06748, Q3KQU3, P35580, P55795, Q15149, P42704, Q7Z406,…	501	1381	12782	1.64421	0.000993402	3.9755e-05	0.00308639
SP_PIR_KEYWORDS	hydroxylation	13	2.08668	2.63211e-06	Q02388, P25940, P12110, P08572, P02452, A6NMZ7, P02461, Q9UMD9, P02462, Q9NYQ6, P02458, Q14993, P12107	623	71	19235	5.65313	0.0012705	3.34549e-05	0.00377184
SP_PIR_KEYWORDS	viral nucleoprotein	9	1.44462	2.68851e-06	P52597, P05455, Q5CZC0, P14866, O43390, Q15029, Q00839, Q5T6W2, O60506	623	29	19235	9.58183	0.00129771	3.32956e-05	0.00385266
INTERPRO	IPR013817:Pre-ATP-grasp fold	6	0.963082	2.78471e-06	P11498, P05165, Q13085, P22102, O00763, Q96RQ3	590	8	16659	21.1767	0.00325559	0.000407529	0.00448815
SMART	SM00360:RRM	23	3.69181	2.87866e-06	Q9H361, Q13151, P52597, Q4G0J3, P51991, P22626, P14866, O75821, Q9NZI8, P31943, P23246, Q15717, P55795, Q15020, Q9BWF3, P05455, O43390, P43243, O43719, O00425, P19338, A6NLN1, O60506	311	211	9079	3.18217	0.000595705	0.000297897	0.00362835
KEGG_PATHWAY	hsa00620:Pyruvate metabolism	12	1.92616	3.10987e-06	P11498, P24752, Q13085, P11177, P40926, O00763, P00338, Q04760, P14618, P09622, P30837, P05091	261	40	5085	5.84483	0.000438396	0.000146153	0.00367385
GOTERM_BP_FAT	GO:0006611~protein export from nucleus	8	1.28411	3.45149e-06	Q9UIA9, O14980, P27797, Q9HAV4, P62826, P35658, P38646, P63241	543	18	13528	11.0726	0.00796522	0.000210428	0.00603597
GOTERM_BP_FAT	GO:0046164~alcohol catabolic process	15	2.4077	3.5673e-06	P60174, Q01813, P40926, P18669, P04075, P06733, P00338, P19367, P17858, P11177, P00558, P52209, P09104, P10155, P14618	543	81	13528	4.6136	0.0082314	0.000211912	0.0062385
SP_PIR_KEYWORDS	antioxidant	6	0.963082	3.93605e-06	P30041, P30044, P30048, P32119, Q13162, Q06830	623	9	19235	20.5832	0.00189931	4.75268e-05	0.00564036
KEGG_PATHWAY	hsa04110:Cell cycle	21	3.37079	4.03953e-06	Q9UJX3, Q09472, Q9Y6D9, Q92769, P31947, P31946, P61981, P78527, P25205, Q13547, P33993, P27348, P53350, P33991, P62258, P11802, Q04917, P49736, P12004, Q14566, P63104	261	125	5085	3.2731	0.000569413	0.000142384	0.00477209
UP_SEQ_FEATURE	repeat:HEAT 14	6	0.963082	4.06046e-06	Q5VYK3, O75155, Q92616, P30154, P30153, Q86VP6	623	9	19113	20.4526	0.0092956	0.000444619	0.0070949
SP_PIR_KEYWORDS	mRNA transport	13	2.08668	4.12998e-06	Q5SRE5, Q8WUM0, P42704, P49792, Q9UIA9, O14980, Q8NI27, Q8N1F7, P38919, P61326, P35658, P63241, Q13838	623	74	19235	5.42395	0.00199279	4.86521e-05	0.00591824
INTERPRO	IPR004009:Myosin, N-terminal, SH3-like	7	1.1236	4.48769e-06	P35580, Q7Z406, Q9Y2K3, P35749, P35579, P13535, Q9Y623	590	14	16659	14.1178	0.00524131	0.000583729	0.00723277
GOTERM_MF_FAT	GO:0051920~peroxiredoxin activity	6	0.963082	5.26983e-06	P30041, P30044, P30048, P32119, Q13162, Q06830	524	8	12983	18.5825	0.00397607	0.000221309	0.00802877
UP_SEQ_FEATURE	domain:Biotin carboxylation	5	0.802568	5.41216e-06	P11498, P05165, Q13085, O00763, Q96RQ3	623	5	19113	30.679	0.0123709	0.000565659	0.00945665
UP_SEQ_FEATURE	domain:Biotinyl-binding	5	0.802568	5.41216e-06	P11498, P05165, Q13085, O00763, Q96RQ3	623	5	19113	30.679	0.0123709	0.000565659	0.00945665
SP_PIR_KEYWORDS	transit peptide	36	5.77849	5.93661e-06	P24752, P00367, P36551, Q07021, Q02252, P00505, P48735, P09622, P30837, P05091, Q96RQ3, P05165, Q9HCC0, P51398, P30044, P30048, P13804, P11498, Q9BYT8, P40926, P49411, P23378, P34897, P38646, P04181, Q6PI48, P11177, P31930, P42704, P10809, P30084, P40939, Q86UT6, P25705, P07954, Q99798	623	476	19235	2.33507	0.00286328	6.82689e-05	0.00850704
INTERPRO	IPR000504:RNA recognition motif, RNP-1	23	3.69181	5.9658e-06	Q9H361, Q13151, P52597, Q4G0J3, P51991, P22626, P14866, O75821, Q9NZI8, P31943, P23246, Q15717, P55795, Q15020, Q9BWF3, P05455, O43390, P43243, O43719, O00425, P19338, A6NLN1, O60506	590	211	16659	3.07781	0.00696163	0.000698354	0.00961493
SP_PIR_KEYWORDS	Redox-active center	10	1.60514	6.26045e-06	P30041, Q15084, P30044, P30048, Q86VQ3, P07237, P09622, P32119, Q13162, Q06830	623	42	19235	7.35114	0.00301924	7.03186e-05	0.00897107
GOTERM_BP_FAT	GO:0016052~carbohydrate catabolic process	17	2.72873	6.68025e-06	P60174, Q01813, P40926, P18669, P04075, P06733, P00338, P06737, P19367, P17858, P11177, P00558, P52209, P09104, P11216, P10155, P14618	543	109	13528	3.88558	0.015359	0.00038688	0.0116821
INTERPRO	IPR012677:Nucleotide-binding, alpha-beta plait	23	3.69181	6.94905e-06	Q9H361, Q13151, P52597, Q4G0J3, P51991, P22626, P14866, O75821, Q9NZI8, P31943, P23246, Q15717, P55795, Q15020, Q9BWF3, P05455, O43390, P43243, O43719, O00425, P19338, A6NLN1, O60506	590	213	16659	3.04891	0.00810435	0.000739487	0.0111995
GOTERM_BP_FAT	GO:0006606~protein import into nucleus	15	2.4077	7.38667e-06	O00629, P52294, Q14974, Q92973, P55060, Q9UIA9, Q8TEX9, Q96P70, O60684, O95373, P49792, O14980, P52292, P62826, O00410	543	86	13528	4.34537	0.0169694	0.000417351	0.0129174
GOTERM_CC_FAT	GO:0012505~endomembrane system	57	9.14928	7.41675e-06	Q8IVL0, P55735, Q14573, P55060, O00291, Q13185, P37802, P53621, P49792, Q8WXH0, P42166, Q8N1F7, P62826, O00629, P52294, Q8WUM0, Q92973, Q8TEX9, Q96P70, P49454, O60684, P42704, Q9UBF2, Q9P2E9, P10809, O00763, O95782, Q10567, Q14789, P61158, P56537, P63241, O00410, Q14974, Q9UIA9, P35606, P09874, P16615, Q13492, O95373, P14625, Q9Y678, P52292, O75081, Q00610, P12004, Q9BZ29, Q9P212, Q9Y6D9, Q9Y6D5,…	501	782	12782	1.85964	0.00339112	0.000130641	0.0105481
INTERPRO	IPR019479:Peroxiredoxin, C-terminal	5	0.802568	7.51936e-06	P30041, P30048, P32119, Q13162, Q06830	590	5	16659	28.2356	0.00876655	0.000733498	0.0121186
INTERPRO	IPR005482:Biotin carboxylase, C-terminal	5	0.802568	7.51936e-06	P11498, P05165, Q13085, O00763, Q96RQ3	590	5	16659	28.2356	0.00876655	0.000733498	0.0121186
INTERPRO	IPR001882:Biotin-binding site	5	0.802568	7.51936e-06	P11498, P05165, Q13085, O00763, Q96RQ3	590	5	16659	28.2356	0.00876655	0.000733498	0.0121186
INTERPRO	IPR011764:Biotin carboxylation region	5	0.802568	7.51936e-06	P11498, P05165, Q13085, O00763, Q96RQ3	590	5	16659	28.2356	0.00876655	0.000733498	0.0121186
UP_SEQ_FEATURE	repeat:HEAT 13	6	0.963082	7.90305e-06	Q5VYK3, O75155, Q92616, P30154, P30153, Q86VP6	623	10	19113	18.4074	0.0180129	0.000789996	0.0138087
UP_SEQ_FEATURE	repeat:HEAT 12	6	0.963082	7.90305e-06	Q5VYK3, O75155, Q92616, P30154, P30153, Q86VP6	623	10	19113	18.4074	0.0180129	0.000789996	0.0138087
GOTERM_MF_FAT	GO:0008026~ATP-dependent helicase activity	16	2.56822	8.14482e-06	Q9NR30, Q12873, P12956, O75643, O15523, Q9Y230, Q92841, Q13838, P60842, Q92499, Q08211, Q9UNY4, O00148, Q9BQ39, P38919, Q92900	524	98	12983	4.04518	0.00613859	0.000324027	0.0124087
GOTERM_MF_FAT	GO:0070035~purine NTP-dependent helicase activity	16	2.56822	8.14482e-06	Q9NR30, Q12873, P12956, O75643, O15523, Q9Y230, Q92841, Q13838, P60842, Q92499, Q08211, Q9UNY4, O00148, Q9BQ39, P38919, Q92900	524	98	12983	4.04518	0.00613859	0.000324027	0.0124087
GOTERM_BP_FAT	GO:0051028~mRNA transport	15	2.4077	8.48529e-06	Q8WUM0, Q9UIA9, Q13838, Q5SRE5, P42704, P49792, O14980, Q8NI27, Q8N1F7, O00148, P61326, P38919, Q92900, P35658, P63241	543	87	13528	4.29542	0.0194685	0.000467998	0.0148385
KEGG_PATHWAY	hsa00280:Valine, leucine and isoleucine degradation	12	1.92616	8.59118e-06	Q01581, P24752, P05165, Q9HCC0, P30084, P40939, Q99714, Q02252, P09622, P30837, P05091, Q96RQ3	261	44	5085	5.31348	0.00121063	0.000242243	0.0101489
SP_PIR_KEYWORDS	nucleotide binding	15	2.4077	9.00134e-06	P62820, Q9NR30, P61204, P60953, P49411, P52732, Q92841, P60842, P61221, P33176, Q14204, P25705, P38919, Q00839, P41091	623	107	19235	4.32824	0.00433823	9.88058e-05	0.0128985
GOTERM_BP_FAT	GO:0051170~nuclear import	15	2.4077	9.72617e-06	O00629, P52294, Q14974, Q92973, P55060, Q9UIA9, Q8TEX9, Q96P70, O60684, O95373, P49792, O14980, P52292, P62826, O00410	543	88	13528	4.24661	0.0222836	0.000523947	0.0170083
UP_SEQ_FEATURE	repeat:2-1	8	1.28411	1.07734e-05	P55795, P27824, P48634, P27797, P31943, P49454, Q5T6W2, O60506	623	25	19113	9.81727	0.0244745	0.00103192	0.0188235
SP_PIR_KEYWORDS	proteasome	11	1.76565	1.08192e-05	P28074, P43686, Q5VYK3, Q13200, Q15008, P51665, Q99460, P49721, O00231, P62191, O00232	623	56	19235	6.06469	0.00521207	0.00011612	0.0155032
COG_ONTOLOGY	Intracellular trafficking and secretion	12	1.92616	1.09133e-05	O00629, O60684, Q96BY7, Q14974, Q9UBF2, Q92973, Q9Y678, P52292, Q8TEX9, O14617, O60518, O00410	111	42	1950	5.01931	0.000250975	0.000250975	0.00864993
GOTERM_BP_FAT	GO:0006006~glucose metabolic process	20	3.21027	1.15585e-05	P11498, P60174, Q01813, P40926, P18669, P00338, P04075, P06733, P06737, P19367, P62136, P17858, P11177, P00558, P35573, P52209, P09104, P11216, P10155, P14618	543	153	13528	3.25666	0.0264258	0.000608478	0.0202122
UP_SEQ_FEATURE	transit peptide:Mitochondrion	35	5.61798	1.15701e-05	P24752, P00367, P36551, Q07021, Q02252, P00505, P48735, P09622, P30837, P05091, Q96RQ3, P05165, Q9HCC0, P51398, P30044, P30048, P13804, P11498, Q9BYT8, P40926, P49411, P23378, P34897, P38646, Q6PI48, P11177, P31930, P42704, P10809, P30084, P40939, Q86UT6, P25705, P07954, Q99798	623	467	19113	2.29928	0.0262605	0.00106389	0.0202154
GOTERM_CC_FAT	GO:0000785~chromatin	23	3.69181	1.17419e-05	Q12873, P52701, Q92794, Q8TAQ2, Q92769, P46100, P17987, Q96KK5, Q29RF7, P18754, Q13185, P49454, Q13547, P33993, Q09028, Q9Y232, P42166, P49736, P62826, Q92900, Q8NEV1, Q13127, Q13263	501	200	12782	2.93399	0.00536339	0.000199159	0.0166988
GOTERM_MF_FAT	GO:0009374~biotin binding	5	0.802568	1.26056e-05	P11498, P05165, Q13085, O00763, Q96RQ3	524	5	12983	24.7767	0.00948463	0.000476381	0.0192041
GOTERM_BP_FAT	GO:0010498~proteasomal protein catabolic process	16	2.56822	1.26292e-05	Q9UJX3, P43686, Q5VYK3, Q13200, O60907, Q99460, P28074, P14625, Q15008, P51665, Q13618, P49721, O00231, P62191, P55072, O00232	543	102	13528	3.90799	0.028838	0.000650055	0.0220842
GOTERM_BP_FAT	GO:0043161~proteasomal ubiquitin-dependent protein catabolic process	16	2.56822	1.26292e-05	Q9UJX3, P43686, Q5VYK3, Q13200, O60907, Q99460, P28074, P14625, Q15008, P51665, Q13618, P49721, O00231, P62191, P55072, O00232	543	102	13528	3.90799	0.028838	0.000650055	0.0220842
SP_PIR_KEYWORDS	methylation	23	3.69181	1.35238e-05	Q12906, Q13151, P60953, Q09472, P51991, Q12888, P22626, Q96KK5, Q9Y2K3, P31943, P23246, P13535, Q15717, P55795, O00267, Q08211, P67775, P47914, Q00839, P19338, P35749, Q9Y623, Q5T6W2	623	242	19235	2.93438	0.00651075	0.000141991	0.0193783
SMART	SM00490:HELICc	15	2.4077	1.35573e-05	Q9NR30, Q12873, O75643, P46100, O15523, Q2NKX8, Q92841, Q13838, P60842, Q92499, Q08211, Q9UNY4, O00148, Q9BQ39, P38919	311	106	9079	4.13107	0.00280244	0.00093502	0.017087
SMART	SM00088:PINT	7	1.1236	1.35915e-05	Q15008, Q14152, O00231, Q99613, Q9BT78, O00232	311	17	9079	12.0206	0.0028095	0.000703117	0.0171301
UP_SEQ_FEATURE	domain:Fibrillar collagen NC1	6	0.963082	1.41005e-05	P25940, Q17RW2, P02458, P02452, P12107, P02461	623	11	19113	16.734	0.0319112	0.00124659	0.024636
GOTERM_CC_FAT	GO:0022626~cytosolic ribosome	14	2.24719	1.41167e-05	P15880, P46783, P36578, P05386, P46777, P05388, P62424, Q02878, P47914, P23396, P62263, P26373, P46781, P62701	501	81	12782	4.40965	0.00644464	0.000230884	0.0200759
GOTERM_BP_FAT	GO:0006901~vesicle coating	7	1.1236	1.47803e-05	Q13492, P53621, Q9Y678, O00291, P48444, P35606, P53618	543	15	13528	11.6263	0.0336665	0.000744206	0.0258454
UP_SEQ_FEATURE	short sequence motif:"HIGH" region	7	1.1236	1.5406e-05	P56192, P07814, Q9P2J5, P47897, P41252, P54577, P54136	623	18	19113	11.9307	0.0348136	0.00131151	0.0269166
SP_PIR_KEYWORDS	biotin	5	0.802568	1.54245e-05	P11498, P05165, Q13085, O00763, Q96RQ3	623	6	19235	25.729	0.00742243	0.0001585	0.0221017
PIR_SUPERFAMILY	PIRSF000239:alkyl hydroperoxide reductase C22 protein	5	0.802568	1.62108e-05	P30041, P30048, P32119, Q13162, Q06830	319	5	7396	23.185	0.00527081	0.00263889	0.0219347
INTERPRO	IPR000717:Proteasome component region PCI	7	1.1236	1.68878e-05	Q15008, Q14152, O00231, Q99613, Q9BT78, O00232	590	17	16659	11.6264	0.0195815	0.00152006	0.0272154
INTERPRO	IPR002928:Myosin tail	7	1.1236	1.68878e-05	P35580, Q7Z406, Q9Y2K3, P35749, P35579, P13535, Q9Y623	590	17	16659	11.6264	0.0195815	0.00152006	0.0272154
SMART	SM00038:COLFI	6	0.963082	1.75295e-05	P25940, Q17RW2, P02458, P02452, P12107, P02461	311	11	9079	15.9234	0.00362206	0.000725463	0.0220929
SMART	SM00487:DEXDc	15	2.4077	1.87499e-05	Q9NR30, Q12873, O75643, P46100, O15523, Q2NKX8, Q92841, Q13838, P60842, Q92499, Q08211, Q9UNY4, O00148, Q9BQ39, P38919	311	109	9079	4.01738	0.00387375	0.00064667	0.0236309
UP_SEQ_FEATURE	repeat:2-2	8	1.28411	1.88059e-05	P55795, P27824, P48634, P27797, P31943, P49454, Q5T6W2, O60506	623	27	19113	9.09007	0.0423319	0.00154359	0.0328559
GOTERM_BP_FAT	GO:0051248~negative regulation of protein metabolic process	22	3.5313	1.94779e-05	Q9UJX3, P43686, Q13200, P26358, P27797, P30153, P30086, Q99460, P31946, Q9NZI8, P28074, P62258, P67775, Q15008, P51665, P38919, P49721, O00231, O00425, P62191, O00232, Q5HY54	543	187	13528	2.93099	0.0441276	0.000959769	0.0340585
UP_SEQ_FEATURE	compositionally biased region:Asp/Glu-rich (acidic)	15	2.4077	2.01643e-05	Q92973, P12956, Q9BQ67, Q9UMN6, P06748, O15355, Q15084, O95376, Q99733, O43390, Q99613, O43719, Q00839, P19338	623	114	19113	4.03671	0.0453194	0.00159798	0.0352288
KEGG_PATHWAY	hsa00640:Propanoate metabolism	10	1.60514	2.06649e-05	P24752, P05165, Q13085, O00763, P30084, P00338, P40939, Q02252, P30837, P05091	261	32	5085	6.08836	0.00290954	0.000485512	0.0244102
GOTERM_BP_FAT	GO:0031400~negative regulation of protein modification process	17	2.72873	2.08143e-05	Q9UJX3, P43686, Q13200, P26358, P30153, P30086, Q99460, P31946, P28074, P62258, P67775, Q15008, P51665, P49721, O00231, P62191, O00232	543	119	13528	3.55906	0.0470828	0.00100423	0.0363949
INTERPRO	IPR017998:Chaperone, tailless complex polypeptide 1	6	0.963082	2.10243e-05	P40227, P10809, P17987, P50990, P50991, Q99832	590	11	16659	15.4012	0.0243191	0.001757	0.0338804
INTERPRO	IPR000885:Fibrillar collagen, C-terminal	6	0.963082	2.10243e-05	P25940, Q17RW2, P02458, P02452, P12107, P02461	590	11	16659	15.4012	0.0243191	0.001757	0.0338804
GOTERM_BP_FAT	GO:0034504~protein localization in nucleus	15	2.4077	2.11369e-05	O00629, P52294, Q14974, Q92973, P55060, Q9UIA9, Q8TEX9, Q96P70, O60684, O95373, P49792, O14980, P52292, P62826, O00410	543	94	13528	3.97555	0.0477948	0.000998984	0.0369588
GOTERM_BP_FAT	GO:0051301~cell division	29	4.6549	2.12474e-05	Q9UJX3, P60953, P23528, P62136, Q96PY6, P53350, P62826, Q9P258, Q9Y265, Q5TB80, Q9Y266, O14578, Q9BPX3, Q9Y6D9, Q8WUM4, Q29RF7, P18754, Q14008, Q7Z7A1, P49454, P52732, P35579, Q2NKX8, P35580, Q15021, O95347, Q8TD19, P11802, Q9UPV0	543	295	13528	2.44912	0.0480384	0.000984128	0.0371519
GOTERM_MF_FAT	GO:0003779~actin binding	31	4.97592	2.17222e-05	Q13045, P18206, O60610, O95425, Q9ULV4, O76041, O00291, P04075, P23528, P13535, P12814, Q8WXH0, O75083, O43707, P35749, Q5HY54, Q9Y490, Q01518, Q9Y2K3, Q16643, O75369, P35579, P35580, Q15149, P42704, Q7Z406, Q04917, P13797, P61158, P46821, Q9Y623	524	326	12983	2.35607	0.016288	0.0007817	0.0330906
UP_SEQ_FEATURE	domain:PCI	7	1.1236	2.18984e-05	Q15008, Q14152, O00231, Q99613, Q9BT78, O00232	623	19	19113	11.3028	0.0491196	0.00167749	0.0382578
GOTERM_BP_FAT	GO:0006900~membrane budding	7	1.1236	2.285e-05	Q13492, P53621, Q9Y678, O00291, P48444, P35606, P53618	543	16	13528	10.8996	0.0515669	0.00103758	0.0399537
UP_SEQ_FEATURE	domain:ATP-grasp	6	0.963082	2.35248e-05	P11498, P05165, Q13085, P22102, O00763, Q96RQ3	623	12	19113	15.3395	0.05267	0.00174389	0.0410987
INTERPRO	IPR014021:Helicase, superfamily 1 and 2, ATP-binding	15	2.4077	2.40752e-05	Q9NR30, Q12873, O75643, P46100, O15523, Q2NKX8, Q92841, Q13838, P60842, Q92499, Q08211, Q9UNY4, O00148, Q9BQ39, P38919	590	107	16659	3.95826	0.0277987	0.00187773	0.0387961
INTERPRO	IPR001650:DNA/RNA helicase, C-terminal	15	2.4077	2.40752e-05	Q9NR30, Q12873, O75643, P46100, O15523, Q2NKX8, Q92841, Q13838, P60842, Q92499, Q08211, Q9UNY4, O00148, Q9BQ39, P38919	590	107	16659	3.95826	0.0277987	0.00187773	0.0387961
GOTERM_CC_FAT	GO:0044430~cytoskeletal part	64	10.2729	2.41677e-05	P46940, Q13045, Q5VYK3, O95425, P35527, Q13185, Q8IWY7, P23528, Q4VCS5, P53350, Q08211, P13645, O15078, Q9BYB0, O43707, Q5T1M5, Q9Y265, Q9Y266, Q5TB80, O95359, Q7Z494, P17987, P20930, Q8WUM4, Q9Y2K3, O60907, Q7Z7A1, Q16643, O60282, P52732, P49454, P35579, P06748, Q3KQU3, P35580, Q9BV73, Q7Z406, P67775, P61158, O95613, P46821, P56537, O95996, Q9Y6G9, P13535, P33176, P48681, P22392, Q5T7B8, P08670,…	501	952	12782	1.71516	0.0110079	0.000381615	0.0343675
GOTERM_CC_FAT	GO:0015630~microtubule cytoskeleton	43	6.90209	2.42867e-05	O95996, Q13045, Q5VYK3, Q9Y6G9, Q13185, P30153, P33176, P53350, P22392, Q08211, O15078, Q5T7B8, O75592, Q9P258, Q9UKA4, Q9Y265, Q9Y266, Q5TB80, O95359, Q7Z494, Q9Y6D9, P17987, Q8WUM4, O60907, Q14008, Q7Z7A1, Q5TZA2, O60282, P49454, Q99698, P52732, P35579, P06748, Q3KQU3, P15531, P25205, P35580, Q14204, Q9BV73, O43896, Q9UPV0, P67775, O95613, P46821	501	549	12782	1.99828	0.0110618	0.000370713	0.0345367
GOTERM_BP_FAT	GO:0043623~cellular protein complex assembly	20	3.21027	2.62121e-05	P34932, Q14974, Q92973, O60610, P55060, P17987, Q9UIA9, Q02790, O00291, Q8TEX9, P27797, Q96P70, P49454, Q13492, O95373, P10809, O14980, P35749, O00410, Q5HY54	543	162	13528	3.07573	0.0589267	0.00116729	0.0458312
GOTERM_MF_FAT	GO:0003743~translation initiation factor activity	12	1.92616	2.73912e-05	O43432, Q13347, O15371, O75821, Q14152, O00303, Q99613, P56537, P41091, P60842, Q9Y262	524	61	12983	4.87411	0.0204951	0.00094083	0.0417249
GOTERM_CC_FAT	GO:0048475~coated membrane	12	1.92616	2.86208e-05	Q13492, P53621, Q9UBF2, Q9Y678, Q9UJY4, P48444, P35606, O14617, O95782, Q00610, Q10567, P53618	501	63	12782	4.85961	0.013023	0.000422766	0.0406988
GOTERM_CC_FAT	GO:0030117~membrane coat	12	1.92616	2.86208e-05	Q13492, P53621, Q9UBF2, Q9Y678, Q9UJY4, P48444, P35606, O14617, O95782, Q00610, Q10567, P53618	501	63	12782	4.85961	0.013023	0.000422766	0.0406988
INTERPRO	IPR017936:Thioredoxin-like	9	1.44462	2.93352e-05	P30041, Q15084, P30044, P30048, Q86VQ3, P07237, P32119, Q13162, Q06830	590	36	16659	7.0589	0.0337687	0.0021447	0.0472704
UP_SEQ_FEATURE	domain:RRM 3	10	1.60514	2.93559e-05	Q15717, Q9H361, P55795, P52597, P14866, O43390, P31943, P19338, A6NLN1, O60506	623	50	19113	6.13579	0.0652905	0.00210776	0.0512833
INTERPRO	IPR014001:DEAD-like helicase, N-terminal	15	2.4077	2.97467e-05	Q9NR30, Q12873, O75643, P46100, O15523, Q2NKX8, Q92841, Q13838, P60842, Q92499, Q08211, Q9UNY4, O00148, Q9BQ39, P38919	590	109	16659	3.88563	0.0342341	0.00204695	0.0479333
GOTERM_BP_FAT	GO:0070271~protein complex biogenesis	41	6.58106	3.04292e-05	O95996, P34932, Q14573, Q14974, Q01813, O60610, P55060, P14868, Q9UIA9, Q02790, O00291, P27797, Q99714, P30153, P14174, P30086, P31946, P17858, Q13492, O95373, O95163, P08758, P55072, P35749, Q5HY54, Q92973, P17987, Q8TEX9, Q96P70, P49454, P06748, P23921, P07814, P10809, O14980, Q9NU22, Q9P219, P78347, Q15393, O43593, O00410	543	505	13528	2.02268	0.0680773	0.00132941	0.0532027
GOTERM_BP_FAT	GO:0006461~protein complex assembly	41	6.58106	3.04292e-05	O95996, P34932, Q14573, Q14974, Q01813, O60610, P55060, P14868, Q9UIA9, Q02790, O00291, P27797, Q99714, P30153, P14174, P30086, P31946, P17858, Q13492, O95373, O95163, P08758, P55072, P35749, Q5HY54, Q92973, P17987, Q8TEX9, Q96P70, P49454, P06748, P23921, P07814, P10809, O14980, Q9NU22, Q9P219, P78347, Q15393, O43593, O00410	543	505	13528	2.02268	0.0680773	0.00132941	0.0532027
GOTERM_CC_FAT	GO:0030126~COPI vesicle coat	6	0.963082	3.41041e-05	P53621, Q9UBF2, Q9Y678, P48444, P35606, P53618	501	11	12782	13.9162	0.0154986	0.000488004	0.0484942
GOTERM_BP_FAT	GO:0032269~negative regulation of cellular protein metabolic process	21	3.37079	3.56928e-05	Q9UJX3, P43686, Q13200, P26358, P27797, P30153, P30086, Q99460, P31946, Q9NZI8, P28074, P62258, P67775, Q15008, P51665, P38919, P49721, O00231, O00425, P62191, O00232	543	180	13528	2.90657	0.0793742	0.00153034	0.062403
SP_PIR_KEYWORDS	molecular chaperone	6	0.963082	3.60899e-05	P27824, P40227, P10809, P17987, P50990, P50454	623	13	19235	14.2499	0.0172807	0.000363095	0.0517057
INTERPRO	IPR014014:RNA helicase, DEAD-box type, Q motif	9	1.44462	3.6279e-05	Q9NR30, Q92499, O00148, O15523, Q9BQ39, P38919, Q92841, P60842, Q13838	590	37	16659	6.86812	0.0415937	0.00235741	0.0584566
UP_SEQ_FEATURE	domain:Helicase C-terminal	14	2.24719	3.63176e-05	Q9NR30, Q12873, P46100, O15523, Q2NKX8, Q92841, Q13838, P60842, Q92499, Q08211, Q9UNY4, O00148, Q9BQ39, P38919	623	105	19113	4.09053	0.0801383	0.00252807	0.0634414
GOTERM_BP_FAT	GO:0010608~posttranscriptional regulation of gene expression	23	3.69181	3.9582e-05	Q92616, P27797, Q9NZI8, P78527, Q15717, O43432, Q7KZF4, Q92499, Q08211, Q9BXP5, P10809, P11802, Q9UQ80, Q9P219, P38919, Q00839, P61326, O00425, Q92900, P63241, O60506, Q5HY54, P62701	543	211	13528	2.71568	0.0876332	0.00166612	0.0692004
GOTERM_BP_FAT	GO:0006511~ubiquitin-dependent protein catabolic process	25	4.01284	4.05371e-05	Q16531, Q9UJX3, P43686, Q5VYK3, Q13200, Q9UPU5, O60907, Q99460, Q93009, Q70CQ2, P28074, Q86UV5, O95376, P14625, P45974, Q70CQ4, Q15008, P51665, Q13618, P49721, O00231, P62191, P55072, O00232	543	242	13528	2.5737	0.0896501	0.00167585	0.0708696
INTERPRO	IPR005481:Carbamoyl phosphate synthase, large subunit, N-terminal	5	0.802568	4.9724e-05	P11498, P05165, Q13085, O00763, Q96RQ3	590	7	16659	20.1683	0.0565654	0.00305995	0.0801123
INTERPRO	IPR011545:DNA/RNA helicase, DEAD/DEAH box type, N-terminal	11	1.76565	5.01596e-05	Q9NR30, Q92499, Q08211, O75643, O00148, O15523, Q9BQ39, P38919, Q92841, P60842, Q13838	590	61	16659	5.09166	0.0570466	0.00293261	0.080814
GOTERM_BP_FAT	GO:0034660~ncRNA metabolic process	24	3.85233	5.12667e-05	P56192, Q08J23, P46777, P14868, Q9Y2L1, P49588, P26639, P47897, P41252, Q99714, P41250, P54577, P54136, Q6PI48, O43776, P07814, P05455, P12081, Q9P2J5, Q9NSD9, Q9UQ80, P38919, P49591, P62263	543	230	13528	2.59966	0.112004	0.00208183	0.08962
INTERPRO	IPR005479:Carbamoyl phosphate synthetase, large subunit, ATP-binding	6	0.963082	5.52125e-05	P11498, P05165, Q13085, O00763, O14578, Q96RQ3	590	13	16659	13.0318	0.0626098	0.00307411	0.0889514
INTERPRO	IPR011761:ATP-grasp fold	6	0.963082	5.52125e-05	P11498, P05165, Q13085, P22102, O00763, Q96RQ3	590	13	16659	13.0318	0.0626098	0.00307411	0.0889514
GOTERM_CC_FAT	GO:0030663~COPI coated vesicle membrane	6	0.963082	5.65869e-05	P53621, Q9UBF2, Q9Y678, P48444, P35606, P53618	501	12	12782	12.7565	0.0255845	0.000785071	0.0804516
GOTERM_MF_FAT	GO:0003729~mRNA binding	12	1.92616	5.86583e-05	Q15717, Q9H361, Q10570, P05455, P27797, Q9NZI8, P38919, O00425, P23396, P62263, O60506, P60842	524	66	12983	4.50486	0.043378	0.00192627	0.0893341
GOTERM_BP_FAT	GO:0051438~regulation of ubiquitin-protein ligase activity	13	2.08668	5.88055e-05	Q9UJX3, Q7Z7L7, P43686, Q13200, Q99460, P28074, P53350, Q15008, P51665, P49721, O00231, P62191, O00232	543	78	13528	4.15224	0.127381	0.00234649	0.102792
UP_SEQ_FEATURE	domain:Helicase ATP-binding	14	2.24719	5.94673e-05	Q9NR30, Q12873, P46100, O15523, Q2NKX8, Q92841, Q13838, P60842, Q92499, Q08211, Q9UNY4, O00148, Q9BQ39, P38919	623	110	19113	3.9046	0.127837	0.00401483	0.103861
GOTERM_BP_FAT	GO:0006413~translational initiation	10	1.60514	6.06788e-05	Q13347, O15371, O75821, Q14152, O00303, Q99613, P23396, P41091, Q9Y262	543	45	13528	5.53632	0.131161	0.00238016	0.106065
GOTERM_CC_FAT	GO:0000228~nuclear chromosome	19	3.04976	6.34702e-05	P52701, Q92878, Q92769, P46100, P17987, P12956, P18754, Q13185, P49643, P25205, Q13547, P33993, Q15021, Q09028, P42704, O95347, P49736, Q8NEV1, Q13263	501	162	12782	2.99226	0.0286518	0.000854643	0.0902338
INTERPRO	IPR014729:Rossmann-like alpha/beta/alpha sandwich fold	9	1.44462	6.58196e-05	P56192, P08243, Q9P2J5, P47897, P41252, P13804, P49915, P54577, P54136	590	40	16659	6.35301	0.0741817	0.00349738	0.106032
GOTERM_BP_FAT	GO:0017038~protein import	17	2.72873	6.87556e-05	O00629, O00170, P52294, Q14974, Q92973, P55060, Q9UIA9, Q8TEX9, Q96P70, O60684, O95373, P49792, O14980, P52292, P62826, O00410, P63104	543	131	13528	3.23304	0.14727	0.00265168	0.120175
UP_SEQ_FEATURE	domain:MCM	5	0.802568	7.00519e-05	P33993, P33991, P49736, Q14566, P25205	623	8	19113	19.1744	0.148814	0.00459299	0.122336
GOTERM_BP_FAT	GO:0007010~cytoskeleton organization	36	5.77849	7.35315e-05	P60953, Q96PE2, O60610, O95425, Q96N67, P27797, P04075, P35527, P23528, Q4VCS5, P12814, Q9Y6V0, P62826, O43707, O95359, P35749, Q5HY54, Q9P212, Q9Y490, Q01518, P18754, Q96P48, Q14008, Q16643, Q5TZA2, O75369, P52732, P35579, P06748, P35580, Q14204, Q9BV73, Q9Y566, O95613, P13797, P46821	543	436	13528	2.05707	0.156655	0.0027892	0.128518
GOTERM_BP_FAT	GO:0051437~positive regulation of ubiquitin-protein ligase activity during mitotic cell cycle	12	1.92616	7.43395e-05	Q9UJX3, P28074, P43686, P53350, Q13200, Q15008, P51665, Q99460, P49721, O00231, P62191, O00232	543	68	13528	4.39649	0.158232	0.00277439	0.129929
GOTERM_BP_FAT	GO:0033365~protein localization in organelle	18	2.88925	7.56042e-05	O00629, O00170, P52294, Q14974, Q92973, P55060, Q9UIA9, Q8TEX9, Q96P70, O76094, O60684, O95373, P49792, O14980, P52292, P62826, O00410, P63104	543	146	13528	3.07152	0.160695	0.0027768	0.132138
GOTERM_CC_FAT	GO:0044454~nuclear chromosome part	16	2.56822	8.12727e-05	P52701, Q92878, Q92769, P17987, P12956, P46100, P18754, Q13185, P49643, P25205, Q13547, P33993, Q09028, P49736, Q13263, Q8NEV1	501	122	12782	3.34596	0.0365401	0.00106299	0.115529
INTERPRO	IPR002553:Clathrin/coatomer adaptor, adaptin-like, N-terminal	6	0.963082	8.3393e-05	Q9UBF2, Q9Y678, O14617, O95782, Q10567, P53618	590	14	16659	12.101	0.0930403	0.00423697	0.134324
GOTERM_BP_FAT	GO:0051656~establishment of organelle localization	12	1.92616	8.52965e-05	P35580, P53621, P42704, P60953, Q9Y678, P48444, P35606, P49454, Q9Y266, P35579, P06748, P53618	543	69	13528	4.33277	0.179335	0.00308337	0.149066
GOTERM_BP_FAT	GO:0051340~regulation of ligase activity	13	2.08668	8.58612e-05	Q9UJX3, Q7Z7L7, P43686, Q13200, Q99460, P28074, P53350, Q15008, P51665, P49721, O00231, P62191, O00232	543	81	13528	3.99845	0.180408	0.00305607	0.150052
GOTERM_BP_FAT	GO:0019318~hexose metabolic process	21	3.37079	8.91604e-05	P11498, Q06210, P60174, Q01813, P40926, P18669, P00338, P04075, P06733, P06737, P19367, P62136, P17858, P11177, P00558, P52209, P35573, P09104, P11216, P10155, P14618	543	192	13528	2.72491	0.18665	0.00312532	0.155814
INTERPRO	IPR012340:Nucleic acid-binding, OB-fold	10	1.60514	8.95966e-05	P33993, P33991, O43776, P14868, P49736, P54577, P63241, Q6PI48, Q14566, P25205	590	53	16659	5.32747	0.0996055	0.00436222	0.144309
INTERPRO	IPR018525:DNA-dependent ATPase MCM, conserved site	5	0.802568	9.66633e-05	P33993, P33991, P49736, Q14566, P25205	590	8	16659	17.6472	0.107026	0.00451769	0.155683
SP_PIR_KEYWORDS	motor protein	15	2.4077	9.67017e-05	Q9Y6G9, Q9Y2K3, O60282, Q9P2P6, P52732, P35579, P13535, P35580, P33176, Q7Z406, Q14204, O43896, Q5T7B8, P35749, Q9Y623	623	132	19235	3.5085	0.0456351	0.000952795	0.138488
GOTERM_BP_FAT	GO:0051443~positive regulation of ubiquitin-protein ligase activity	12	1.92616	9.7605e-05	Q9UJX3, P28074, P43686, P53350, Q13200, Q15008, P51665, Q99460, P49721, O00231, P62191, O00232	543	70	13528	4.27088	0.202411	0.00336986	0.170559
GOTERM_CC_FAT	GO:0030660~Golgi-associated vesicle membrane	8	1.28411	9.90649e-05	P53621, Q9UBF2, Q9Y678, P48444, P35606, O95782, Q00610, P53618	501	29	12782	7.03806	0.04436	0.00125959	0.140805
GOTERM_BP_FAT	GO:0006607~NLS-bearing substrate import into nucleus	6	0.963082	9.98071e-05	O00629, P52294, O60684, Q14974, P52292, O00410	543	13	13528	11.4985	0.206471	0.00339517	0.174404
GOTERM_MF_FAT	GO:0042623~ATPase activity, coupled	26	4.17335	0.00010598	Q12873, P12956, O15523, Q9Y230, P16615, Q92841, Q08211, Q09028, P38606, O00148, P50990, P05023, P38919, Q92900, Q9NR30, O75643, P35579, Q13838, P60842, P35580, Q92499, Q7Z406, Q9UNY4, Q14204, P25705, Q9BQ39	524	272	12983	2.36836	0.0769994	0.00333299	0.161349
KEGG_PATHWAY	hsa03010:Ribosome	15	2.4077	0.000110179	P15880, P46783, P36578, P05386, P46777, P05388, P32969, P55795, P62424, Q02878, P47914, P23396, P26373, P46781, P62701	261	87	5085	3.3591	0.0154161	0.00221699	0.130086
GOTERM_BP_FAT	GO:0051439~regulation of ubiquitin-protein ligase activity during mitotic cell cycle	12	1.92616	0.000111398	Q9UJX3, P28074, P43686, P53350, Q13200, Q15008, P51665, Q99460, P49721, O00231, P62191, O00232	543	71	13528	4.21072	0.227501	0.00373395	0.19464
GOTERM_CC_FAT	GO:0000502~proteasome complex	11	1.76565	0.000114781	P28074, P43686, Q5VYK3, Q13200, Q15008, P51665, Q99460, P49721, O00231, P62191, O00232	501	61	12782	4.6007	0.0512147	0.00141988	0.163126
INTERPRO	IPR001589:Actinin-type, actin-binding, conserved site	7	1.1236	0.000114913	P12814, Q15149, Q8WXH0, O43707, P13797, O75369, Q5HY54	590	23	16659	8.59344	0.125909	0.00516242	0.18505
SP_PIR_KEYWORDS	lyase	14	2.24719	0.000115621	P35520, Q3LXA3, P30046, P30084, P40939, P06733, P04075, Q04760, P49327, P07954, P09104, Q99798, P11172, P00918	623	118	19235	3.66311	0.0543173	0.00111634	0.165561
UP_SEQ_FEATURE	short sequence motif:"KMSKS" region	6	0.963082	0.000116415	P56192, P07814, Q9P2J5, P47897, P41252, P54577	623	16	19113	11.5046	0.234917	0.00741049	0.203226
INTERPRO	IPR002423:Chaperonin Cpn60/TCP-1	6	0.963082	0.000121461	P40227, P10809, P17987, P50990, P50991, Q99832	590	15	16659	11.2942	0.132587	0.00525429	0.195585
GOTERM_BP_FAT	GO:0006890~retrograde vesicle-mediated transport, Golgi to ER	7	1.1236	0.000130452	P53621, Q9UBF2, Q9Y678, O43896, P48444, P35606, P53618	543	21	13528	8.30448	0.260867	0.00430893	0.227896
GOTERM_BP_FAT	GO:0051276~chromosome organization	38	6.09952	0.000132393	Q15185, O14744, A6NHR9, P52701, P26358, Q12873, Q92794, Q92769, P12956, Q96KK5, Q13185, Q7LBC6, Q9Y230, P09874, O14929, P78527, P49321, Q13547, O00267, Q09028, Q9BWF3, Q9Y4C1, P49736, Q9UKL0, Q9Y265, Q9NR48, Q9BPX3, Q09472, Q92878, Q8TAQ2, Q9UMN6, Q7Z6Z7, P49454, P06748, Q15021, Q99733, O95347, Q9Y232	543	485	13528	1.95198	0.264184	0.00431146	0.231283
UP_SEQ_FEATURE	repeat:HEAT 19	4	0.642055	0.000133886	Q5VYK3, O75155, Q92616, Q86VP6	623	4	19113	30.679	0.265054	0.00828864	0.233691
UP_SEQ_FEATURE	repeat:HEAT 24	4	0.642055	0.000133886	Q5VYK3, O75155, Q92616, Q86VP6	623	4	19113	30.679	0.265054	0.00828864	0.233691
UP_SEQ_FEATURE	repeat:HEAT 22	4	0.642055	0.000133886	Q5VYK3, O75155, Q92616, Q86VP6	623	4	19113	30.679	0.265054	0.00828864	0.233691
UP_SEQ_FEATURE	region of interest:Nonhelical region (C-terminal)	4	0.642055	0.000133886	P02458, P02452, P12107, P02461	623	4	19113	30.679	0.265054	0.00828864	0.233691
UP_SEQ_FEATURE	repeat:HEAT 21	4	0.642055	0.000133886	Q5VYK3, O75155, Q92616, Q86VP6	623	4	19113	30.679	0.265054	0.00828864	0.233691
UP_SEQ_FEATURE	repeat:HEAT 18	4	0.642055	0.000133886	Q5VYK3, O75155, Q92616, Q86VP6	623	4	19113	30.679	0.265054	0.00828864	0.233691
UP_SEQ_FEATURE	repeat:HEAT 20	4	0.642055	0.000133886	Q5VYK3, O75155, Q92616, Q86VP6	623	4	19113	30.679	0.265054	0.00828864	0.233691
UP_SEQ_FEATURE	repeat:HEAT 17	4	0.642055	0.000133886	Q5VYK3, O75155, Q92616, Q86VP6	623	4	19113	30.679	0.265054	0.00828864	0.233691
UP_SEQ_FEATURE	repeat:HEAT 23	4	0.642055	0.000133886	Q5VYK3, O75155, Q92616, Q86VP6	623	4	19113	30.679	0.265054	0.00828864	0.233691
UP_SEQ_FEATURE	repeat:HEAT 16	4	0.642055	0.000133886	Q5VYK3, O75155, Q92616, Q86VP6	623	4	19113	30.679	0.265054	0.00828864	0.233691
GOTERM_BP_FAT	GO:0051351~positive regulation of ligase activity	12	1.92616	0.000144021	Q9UJX3, P28074, P43686, P53350, Q13200, Q15008, P51665, Q99460, P49721, O00231, P62191, O00232	543	73	13528	4.09536	0.283746	0.00462429	0.251573
GOTERM_BP_FAT	GO:0000279~M phase	29	4.6549	0.000145315	Q12906, Q9UJX3, P52701, Q96PY6, P53350, P52292, P62826, Q9P258, Q9Y265, Q5TB80, Q9Y266, O14578, O95359, Q9BPX3, Q9Y6D9, Q92878, Q29RF7, P18754, Q14008, P49454, P52732, P35579, Q2NKX8, Q15021, Q14204, O95347, Q8TD19, Q9UPV0, O95613	543	329	13528	2.19602	0.285891	0.00460198	0.25383
SMART	SM00350:MCM	5	0.802568	0.000146644	P33993, P33991, P49736, Q14566, P25205	311	9	9079	16.2183	0.0299013	0.00432739	0.18468
GOTERM_CC_FAT	GO:0017053~transcriptional repressor complex	9	1.44462	0.000158382	Q13547, P56545, Q09028, Q12873, Q92769, Q8TAQ2, O60907, P31946, Q8NEV1	501	41	12782	5.60041	0.0699759	0.00190725	0.225026
GOTERM_BP_FAT	GO:0046394~carboxylic acid biosynthetic process	18	2.88925	0.0001589	Q15185, P35520, P60174, P00367, Q9Y617, P31153, O95573, P49327, P14174, P00505, P54886, O43175, Q9H4A4, Q13085, Q9BV20, P08243, P09960, O00763	543	155	13528	2.89317	0.308022	0.00496333	0.277529
GOTERM_BP_FAT	GO:0016053~organic acid biosynthetic process	18	2.88925	0.0001589	Q15185, P35520, P60174, P00367, Q9Y617, P31153, O95573, P49327, P14174, P00505, P54886, O43175, Q9H4A4, Q13085, Q9BV20, P08243, P09960, O00763	543	155	13528	2.89317	0.308022	0.00496333	0.277529
GOTERM_MF_FAT	GO:0003678~DNA helicase activity	9	1.44462	0.000161677	P33993, P33991, Q08211, Q12873, P12956, P46100, Q9Y230, Q9Y265, Q14566	524	40	12983	5.57476	0.115062	0.00487757	0.246047
UP_SEQ_FEATURE	short sequence motif:Q motif	8	1.28411	0.000164363	Q9NR30, O00148, O15523, Q9BQ39, P38919, Q92841, P60842, Q13838	623	37	19113	6.63329	0.314815	0.00989978	0.286815
INTERPRO	IPR000089:Biotin/lipoyl attachment	5	0.802568	0.000169128	P11498, P05165, Q13085, O00763, Q96RQ3	590	9	16659	15.6864	0.179684	0.00704879	0.272242
INTERPRO	IPR001208:DNA-dependent ATPase MCM	5	0.802568	0.000169128	P33993, P33991, P49736, Q14566, P25205	590	9	16659	15.6864	0.179684	0.00704879	0.272242
UP_SEQ_FEATURE	nucleotide phosphate-binding region:NAD	11	1.76565	0.000171002	P56545, P00367, P40926, P00338, Q99714, Q02252, P09622, O43175, P30837, Q9Y277, P05091	623	76	19113	4.44038	0.325199	0.0100349	0.298383
INTERPRO	IPR004871:Cleavage and polyadenylation specificity factor, A subunit, C-terminal	4	0.642055	0.000171281	Q16531, Q10570, Q15393	590	4	16659	28.2356	0.18175	0.00689292	0.275704
UP_SEQ_FEATURE	short sequence motif:Nuclear localization signal	25	4.01284	0.000175606	Q9UGU0, P26358, Q92797, P23528, P09874, P49321, Q7KZF4, Q08211, P52292, O43390, P42166, Q9Y266, O00629, P52294, Q10570, Q09472, P22626, P49454, P06748, O60684, Q15020, Q99733, Q8NI27, P78347, P43243	623	325	19113	2.35992	0.332309	0.0100474	0.306406
GOTERM_BP_FAT	GO:0032268~regulation of cellular protein metabolic process	37	5.939	0.000176529	Q9UJX3, P43686, P35520, Q13200, P26358, Q92769, Q96N67, P27797, P30153, P30086, Q99460, P31946, O43432, P53350, Q9UQ80, P38919, O00425, Q92900, P62701, Q7Z7L7, Q09472, Q92616, Q9NZI8, P28074, Q92499, P62258, P67775, P11802, Q15008, P51665, Q9P219, O00231, P61326, P49721, P62191, P63241, O00232	543	474	13528	1.94472	0.335721	0.0054392	0.308274
GOTERM_MF_FAT	GO:0048037~cofactor binding	24	3.85233	0.000184329	P35520, P00367, Q9Y617, P23378, Q99714, P34897, P49327, Q02252, P00505, P48735, P06737, O43175, P11766, P09874, P09622, P04181, P56545, P08243, P52209, P40939, P13804, P11216, O00154, Q7Z494	524	249	12983	2.38812	0.13009	0.00534588	0.280475
UP_SEQ_FEATURE	domain:CH 2	7	1.1236	0.000191342	P12814, Q15149, Q8WXH0, O43707, P13797, O75369, Q5HY54	623	27	19113	7.95381	0.356046	0.0106774	0.333819
UP_SEQ_FEATURE	domain:CH 1	7	1.1236	0.000191342	P12814, Q15149, Q8WXH0, O43707, P13797, O75369, Q5HY54	623	27	19113	7.95381	0.356046	0.0106774	0.333819
GOTERM_CC_FAT	GO:0030137~COPI-coated vesicle	6	0.963082	0.000194583	P53621, Q9UBF2, Q9Y678, P48444, P35606, P53618	501	15	12782	10.2052	0.0852713	0.00228272	0.276394
SP_PIR_KEYWORDS	allosteric enzyme	8	1.28411	0.000223277	P35520, P23921, Q01813, P11216, P14618, P06737, P19367, P17858	623	39	19235	6.33329	0.102242	0.00211257	0.319488
BIOCARTA	h_glycolysisPathway:Glycolysis Pathway	6	0.963082	0.000224644	P60174, P18669, P00558, P06733, P19367, P17858	86	11	1437	9.11416	0.0285664	0.0285664	0.260938
GOTERM_BP_FAT	GO:0005996~monosaccharide metabolic process	22	3.5313	0.000234362	P11498, Q06210, P60174, P40926, Q01813, P18669, P00338, P04075, P06733, P06737, P19367, P62136, P17858, P11177, P00558, P60891, P52209, P35573, P09104, P11216, P10155, P14618	543	222	13528	2.4689	0.419044	0.00712033	0.409074
INTERPRO	IPR013816:ATP-grasp fold, subdomain 2	6	0.963082	0.000235995	P11498, P05165, Q13085, P22102, P53396, Q96RQ3	590	17	16659	9.9655	0.241477	0.00917044	0.379686
GOTERM_BP_FAT	GO:0051436~negative regulation of ubiquitin-protein ligase activity during mitotic cell cycle	11	1.76565	0.00024101	Q9UJX3, P28074, P43686, Q13200, Q15008, P51665, Q99460, P49721, O00231, P62191, O00232	543	65	13528	4.21612	0.427926	0.00722683	0.420653
GOTERM_BP_FAT	GO:0031145~anaphase-promoting complex-dependent proteasomal ubiquitin-dependent protein catabolic process	11	1.76565	0.00024101	Q9UJX3, P28074, P43686, Q13200, Q15008, P51665, Q99460, P49721, O00231, P62191, O00232	543	65	13528	4.21612	0.427926	0.00722683	0.420653
GOTERM_CC_FAT	GO:0000790~nuclear chromatin	10	1.60514	0.000254848	Q13547, Q09028, P52701, Q92769, P46100, P17987, Q13185, P18754, Q13263, Q8NEV1	501	55	12782	4.63872	0.110179	0.00291412	0.361852
INTERPRO	IPR002194:Chaperonin TCP-1, conserved site	5	0.802568	0.000274005	P40227, P17987, P50990, P50991, Q99832	590	10	16659	14.1178	0.274507	0.0102983	0.440713
GOTERM_MF_FAT	GO:0033293~monocarboxylic acid binding	10	1.60514	0.000274681	P11498, P05165, Q13085, O00763, P40939, Q02252, P06737, P11766, O00154, Q96RQ3	524	54	12983	4.58828	0.187539	0.00766262	0.417685
GOTERM_BP_FAT	GO:0051640~organelle localization	13	2.08668	0.000295448	P35580, P53621, P42704, P60953, Q9Y678, P48444, P35606, P49454, Q9Y266, P35579, O95359, P06748, P53618	543	92	13528	3.52038	0.495736	0.00873922	0.515439
GOTERM_CC_FAT	GO:0005840~ribosome	21	3.37079	0.000303469	P15880, P36578, P46783, P46777, P05386, P05388, Q92616, P06748, P32969, P55795, P51398, Q9P2E9, P62424, Q02878, P47914, Q9UHB9, P23396, P62263, P26373, P46781, P62701	501	215	12782	2.49196	0.12978	0.00338474	0.430749
PIR_SUPERFAMILY	PIRSF002328:myosin heavy chain	4	0.642055	0.00030501	P35580, Q7Z406, P35749, P35579	319	4	7396	23.185	0.0946634	0.0326061	0.41196
GOTERM_BP_FAT	GO:0006259~DNA metabolic process	38	6.09952	0.000305072	Q15185, Q16531, P52701, P26358, P12956, Q9UMS4, P49643, Q9Y230, P09874, P23246, P78527, P49321, Q09028, Q9BWF3, P52292, Q13564, P49736, P62826, Q9Y265, P55072, Q92900, P12004, Q14566, Q96T76, Q92878, P46100, Q12888, Q9H2G2, P49454, P25205, P33993, P62937, P23921, P33991, P10809, Q9UPV0, Q9P287	543	506	13528	1.87097	0.506858	0.00890893	0.532185
GOTERM_BP_FAT	GO:0051352~negative regulation of ligase activity	11	1.76565	0.000310792	Q9UJX3, P28074, P43686, Q13200, Q15008, P51665, Q99460, P49721, O00231, P62191, O00232	543	67	13528	4.09027	0.513353	0.0089623	0.542138
GOTERM_BP_FAT	GO:0051444~negative regulation of ubiquitin-protein ligase activity	11	1.76565	0.000310792	Q9UJX3, P28074, P43686, Q13200, Q15008, P51665, Q99460, P49721, O00231, P62191, O00232	543	67	13528	4.09027	0.513353	0.0089623	0.542138
GOTERM_MF_FAT	GO:0016836~hydro-lyase activity	9	1.44462	0.000323424	P35520, P30084, P40939, P06733, P49327, P07954, P09104, Q99798, P00918	524	44	12983	5.06796	0.216942	0.00869582	0.491633
UP_SEQ_FEATURE	domain:Carboxyltransferase	4	0.642055	0.000326596	P11498, Q9HCC0, Q13085, O00763	623	5	19113	24.5432	0.528244	0.0177289	0.569153
GOTERM_BP_FAT	GO:0048285~organelle fission	22	3.5313	0.00035832	Q9BPX3, Q9UJX3, Q9Y6D9, Q29RF7, P18754, Q14008, P49454, P52732, Q2NKX8, Q96PY6, Q15021, P53350, O95347, Q8TD19, Q9UPV0, O00429, P62826, Q9P258, Q9Y265, Q9Y266, Q5TB80, O14578	543	229	13528	2.39343	0.564115	0.0101992	0.624801
GOTERM_BP_FAT	GO:0006091~generation of precursor metabolites and energy	27	4.33387	0.000362369	Q06210, Q01813, P06733, P04075, P48735, P06737, P09622, P17858, P62136, P38606, P35573, P13804, P10155, P09104, P11216, P60174, P40926, P18669, P00338, P19367, P11177, P31930, P00558, P25705, P14618, P07954, Q99798	543	313	13528	2.14908	0.568186	0.0101887	0.631839
BIOCARTA	h_npcPathway:Mechanism of Protein Import into the Nucleus	6	0.963082	0.000367267	Q14974, P49792, P52292, P18754, P46060, P62826	86	12	1437	8.35465	0.0462809	0.0234146	0.426279
UP_SEQ_FEATURE	domain:Actin-binding	6	0.963082	0.000370894	P12814, Q15149, Q8WXH0, O43707, O75369, Q5HY54	623	20	19113	9.20369	0.573957	0.0196466	0.646114
SMART	SM00382:AAA	15	2.4077	0.000393285	Q8IVL0, P43686, O75643, Q96QE3, Q9ULI0, Q9Y230, P25205, P33993, P61221, P33991, Q14204, Q9NU22, Q9Y265, P62191, P55072	311	144	9079	3.04093	0.0781992	0.0101266	0.494589
UP_SEQ_FEATURE	compositionally biased region:Poly-Lys	18	2.88925	0.000404938	Q12906, Q8IVL0, Q9HC10, Q12873, Q92794, P30419, P46100, Q9H2G2, Q7Z7A1, O15355, O76094, Q9ULD9, Q15020, Q2LD37, Q13428, Q12802, O43719, O95359	623	205	19113	2.69376	0.606056	0.020949	0.705222
SP_PIR_KEYWORDS	ribosomal protein	17	2.72873	0.00041645	P15880, P46783, P36578, P46777, P05386, P05388, P32969, P55795, P51398, P62424, Q02878, P47914, P23396, P62263, P26373, P46781, P62701	623	188	19235	2.79187	0.182241	0.00386151	0.595135
INTERPRO	IPR000738:WHEP-TRS	4	0.642055	0.000416923	P56192, P07814, P12081, P41250	590	5	16659	22.5885	0.386343	0.0151441	0.66986
KEGG_PATHWAY	hsa04530:Tight junction	18	2.88925	0.000418266	P60953, Q92797, P30154, Q9Y2K3, P30153, P35579, P13535, P12814, P35580, Q9UI47, Q7Z406, P11802, P67775, O43707, Q9NR48, Q8NEV1, P35749, Q9Y623	261	134	5085	2.61709	0.0572818	0.00734636	0.493013
INTERPRO	IPR002314:Aminoacyl-tRNA synthetase, class II (G, H, P and S), conserved region	5	0.802568	0.000418565	P07814, P26639, P12081, P41250, P49591	590	11	16659	12.8344	0.387522	0.014746	0.672491
GOTERM_BP_FAT	GO:0048194~Golgi vesicle budding	5	0.802568	0.000441228	P53621, Q9Y678, P48444, P35606, P53618	543	10	13528	12.4567	0.640324	0.0122443	0.768842
GOTERM_BP_FAT	GO:0048205~COPI coating of Golgi vesicle	5	0.802568	0.000441228	P53621, Q9Y678, P48444, P35606, P53618	543	10	13528	12.4567	0.640324	0.0122443	0.768842
GOTERM_BP_FAT	GO:0048200~Golgi transport vesicle coating	5	0.802568	0.000441228	P53621, Q9Y678, P48444, P35606, P53618	543	10	13528	12.4567	0.640324	0.0122443	0.768842
GOTERM_CC_FAT	GO:0031988~membrane-bounded vesicle	40	6.42055	0.000457171	Q5VYK3, Q9BTT0, O00291, P04075, P35606, P30086, P31946, P09622, P08133, P12814, P30041, Q13492, P53621, Q7KZF4, Q9Y678, P14625, P50991, P62826, Q9Y6V0, Q00610, O43707, P05023, P35749, Q06830, P63104, P27824, P20930, Q8WUM4, P49327, P41250, Q15084, P42356, Q14697, Q9UBF2, P62258, P10809, P07237, P48444, O95782, P53618	501	568	12782	1.79669	0.188955	0.00497407	0.648258
GOTERM_CC_FAT	GO:0033279~ribosomal subunit	15	2.4077	0.000477072	P15880, P46783, P36578, P46777, P05386, P05388, P06748, P51398, P62424, Q02878, P47914, P23396, P62263, P46781, P62701	501	128	12782	2.9898	0.196318	0.00506969	0.676389
GOTERM_CC_FAT	GO:0016023~cytoplasmic membrane-bounded vesicle	39	6.26003	0.000479291	Q5VYK3, Q9BTT0, O00291, P35606, P30086, P31946, P09622, P08133, P12814, P30041, Q13492, P53621, Q7KZF4, Q9Y678, P14625, P50991, Q9Y6V0, P62826, Q00610, O43707, P05023, P35749, Q06830, P63104, P27824, P20930, Q8WUM4, P49327, P41250, Q15084, P42356, Q14697, Q9UBF2, P62258, P10809, P07237, P48444, O95782, P53618	501	550	12782	1.8091	0.197134	0.00497775	0.679524
GOTERM_BP_FAT	GO:0031398~positive regulation of protein ubiquitination	12	1.92616	0.000505581	Q9UJX3, P28074, P43686, P53350, Q13200, Q15008, P51665, Q99460, P49721, O00231, P62191, O00232	543	84	13528	3.55906	0.690168	0.0138523	0.880509
GOTERM_CC_FAT	GO:0042641~actomyosin	7	1.1236	0.000510146	P35580, Q7Z406, O43707, Q16643, P35749, P35579, Q4VCS5	501	27	12782	6.61447	0.208406	0.00518001	0.723122
KEGG_PATHWAY	hsa03050:Proteasome	10	1.60514	0.000510898	P28074, P43686, Q13200, Q15008, P51665, Q99460, P49721, O00231, P62191, O00232	261	47	5085	4.14527	0.0695203	0.00797415	0.601897
GOTERM_CC_FAT	GO:0005813~centrosome	21	3.37079	0.000516001	Q13045, Q5VYK3, Q9Y6D9, P17987, Q8WUM4, Q7Z7A1, Q14008, Q5TZA2, P06748, P15531, P25205, P53350, P22392, Q08211, O15078, Q9BV73, Q9UPV0, Q9UKA4, O95613, Q9Y265, Q5TB80, O95359	501	224	12782	2.39184	0.210527	0.00512572	0.731393
GOTERM_MF_FAT	GO:0051287~NAD or NADH binding	9	1.44462	0.000516146	P56545, P00367, P40939, Q99714, P48735, P09622, P11766, P09874, O43175	524	47	12983	4.74448	0.323151	0.0133687	0.783514
GOTERM_BP_FAT	GO:0000280~nuclear division	21	3.37079	0.000546866	Q9BPX3, Q9UJX3, Q9Y6D9, Q29RF7, P18754, Q14008, P49454, P52732, Q2NKX8, Q96PY6, Q15021, P53350, O95347, Q8TD19, Q9UPV0, P62826, Q9P258, Q9Y265, Q9Y266, Q5TB80, O14578	543	220	13528	2.3781	0.718447	0.0148004	0.952088
GOTERM_BP_FAT	GO:0007067~mitosis	21	3.37079	0.000546866	Q9BPX3, Q9UJX3, Q9Y6D9, Q29RF7, P18754, Q14008, P49454, P52732, Q2NKX8, Q96PY6, Q15021, P53350, O95347, Q8TD19, Q9UPV0, P62826, Q9P258, Q9Y265, Q9Y266, Q5TB80, O14578	543	220	13528	2.3781	0.718447	0.0148004	0.952088
PIR_SUPERFAMILY	PIRSF002584:molecular chaperone t-complex-type	5	0.802568	0.000573181	P40227, P17987, P50990, P50991, Q99832	319	10	7396	11.5925	0.170482	0.0456527	0.772864
GOTERM_CC_FAT	GO:0044429~mitochondrial part	41	6.58106	0.000580952	P24752, P00367, P36551, P47897, Q07021, Q99714, O95573, P30086, P00505, Q8N163, P09622, P30837, P05091, Q96RQ3, P05165, Q9HCC0, P51398, O00429, P13804, P11498, Q9BYT8, P40926, P49411, P34897, P41250, P54886, P19367, P38646, P04181, Q6PI48, P11177, P31930, P42704, P10809, P30084, P40939, Q86UT6, P25705, P07954, Q99798, Q9Y277	501	595	12782	1.75804	0.233679	0.00564684	0.823104
SMART	SM00033:CH	10	1.60514	0.000584178	P46940, P12814, Q8IVL0, Q15149, Q8WXH0, P37802, O43707, P13797, O75369, Q5HY54	311	70	9079	4.17042	0.113931	0.0133501	0.733839
INTERPRO	IPR003593:ATPase, AAA+ type, core	15	2.4077	0.00059015	Q8IVL0, P43686, O75643, Q96QE3, Q9ULI0, Q9Y230, P25205, P33993, P61221, P33991, Q14204, Q9NU22, Q9Y265, P62191, P55072	590	144	16659	2.94121	0.499061	0.0201262	0.946942
GOTERM_CC_FAT	GO:0030120~vesicle coat	8	1.28411	0.000590571	P53621, Q9UBF2, Q9Y678, P48444, P35606, O95782, Q00610, P53618	501	38	12782	5.37115	0.237049	0.00562084	0.836679
SP_PIR_KEYWORDS	homodimer	11	1.76565	0.000594832	P12814, P60174, P14868, P09211, P12081, P07237, P07741, P00505, P11766, Q5HY54, P01266	623	89	19235	3.81599	0.24978	0.00540776	0.849044
GOTERM_MF_FAT	GO:0003774~motor activity	16	2.56822	0.000600229	Q9Y6G9, Q9Y2K3, O60282, Q9P2P6, P52732, P35579, P13535, P35580, P33176, Q7Z406, Q14204, O43896, Q5T7B8, P35749, Q9Y623, Q7Z494	524	142	12983	2.79174	0.36486	0.0150164	0.910608
UP_SEQ_FEATURE	domain:Thioredoxin	7	1.1236	0.000606554	P30041, P30044, P30048, Q86VQ3, P32119, Q13162, Q06830	623	33	19113	6.50766	0.75229	0.0305351	1.0546
KEGG_PATHWAY	hsa03040:Spliceosome	17	2.72873	0.000610405	O94906, P51991, O75643, Q9UMS4, O75533, Q15029, Q13838, O43172, Q8NI27, Q15393, Q6P2Q9, P38919, Q00839, P61326, Q15459, Q15365, Q5T6W2	261	126	5085	2.62863	0.0824914	0.00857238	0.718741
SP_PIR_KEYWORDS	trna-binding	5	0.802568	0.000613309	P56192, Q08J23, P49588, P54577, Q9HAV4	623	13	19235	11.8749	0.25645	0.00547236	0.87531
GOTERM_MF_FAT	GO:0008092~cytoskeletal protein binding	37	5.939	0.000623954	O95996, Q13045, P18206, O60610, O76041, O95425, Q9ULV4, O00291, P04075, P23528, P13535, P12814, P33176, P22392, O15078, Q8WXH0, O75083, O43707, P35749, Q5HY54, Q9Y490, Q01518, Q9Y2K3, Q9Y6D5, Q16643, Q5TZA2, O75369, P35579, P15531, P35580, Q15149, P42704, Q7Z406, Q04917, P13797, P61158, P46821, Q9Y623	524	504	12983	1.81893	0.376157	0.0151059	0.946441
UP_SEQ_FEATURE	region of interest:NLS binding site (minor)	4	0.642055	0.000637376	O00629, P52294, O60684, P52292	623	6	19113	20.4526	0.769252	0.0313762	1.1079
UP_SEQ_FEATURE	repeat:ARM 10; atypical	4	0.642055	0.000637376	O00629, P52294, O60684, P52292	623	6	19113	20.4526	0.769252	0.0313762	1.1079
UP_SEQ_FEATURE	propeptide:N-terminal propeptide	4	0.642055	0.000637376	P02458, P02452, P12107, P02461	623	6	19113	20.4526	0.769252	0.0313762	1.1079
UP_SEQ_FEATURE	repeat:ARM 1; truncated	4	0.642055	0.000637376	O00629, P52294, O60684, P52292	623	6	19113	20.4526	0.769252	0.0313762	1.1079
UP_SEQ_FEATURE	region of interest:NLS binding site (major)	4	0.642055	0.000637376	O00629, P52294, O60684, P52292	623	6	19113	20.4526	0.769252	0.0313762	1.1079
GOTERM_BP_FAT	GO:0031396~regulation of protein ubiquitination	13	2.08668	0.000640219	Q9UJX3, Q7Z7L7, P43686, Q13200, Q99460, P28074, P53350, Q15008, P51665, P49721, O00231, P62191, O00232	543	100	13528	3.23875	0.77324	0.0171062	1.11376
GOTERM_CC_FAT	GO:0044420~extracellular matrix part	14	2.24719	0.000647206	Q02388, P25940, Q5TAT6, P08572, Q96RW7, P02452, P02461, Q9UMD9, P02462, Q2UY09, Q17RW2, P02458, Q14993, P12107	501	117	12782	3.05283	0.256596	0.00603308	0.916572
GOTERM_BP_FAT	GO:0000087~M phase of mitotic cell cycle	21	3.37079	0.000690315	Q9BPX3, Q9UJX3, Q9Y6D9, Q29RF7, P18754, Q14008, P49454, P52732, Q2NKX8, Q96PY6, Q15021, P53350, O95347, Q8TD19, Q9UPV0, P62826, Q9P258, Q9Y265, Q9Y266, Q5TB80, O14578	543	224	13528	2.33564	0.798106	0.0182229	1.20041
GOTERM_BP_FAT	GO:0031397~negative regulation of protein ubiquitination	11	1.76565	0.000700903	Q9UJX3, P28074, P43686, Q13200, Q15008, P51665, Q99460, P49721, O00231, P62191, O00232	543	74	13528	3.70335	0.803002	0.0182916	1.21872
PIR_SUPERFAMILY	PIRSF003023:translation initiation factor eIF-4A	4	0.642055	0.000738209	O00148, P38919, P60842, Q13838	319	5	7396	18.548	0.213958	0.0470082	0.994357
GOTERM_CC_FAT	GO:0005798~Golgi-associated vesicle	9	1.44462	0.000749251	P53621, Q9UBF2, P42356, Q9Y678, P48444, P35606, O95782, Q00610, P53618	501	51	12782	4.50229	0.290564	0.00684219	1.06037
GOTERM_MF_FAT	GO:0043531~ADP binding	6	0.963082	0.000756411	P35580, P00367, P52701, P60891, P25705, P35579	524	19	12983	7.82423	0.43564	0.0177181	1.14628
UP_SEQ_FEATURE	binding site:Substrate	22	3.5313	0.000765408	P25325, P11498, P60174, P00367, P36551, Q01813, P40926, P00338, P04075, P06733, Q99714, P14174, P41250, P48735, P17858, P23921, P00558, Q96KP4, P09960, P09104, P07954, P14618	623	297	19113	2.27252	0.828147	0.0367772	1.32906
KEGG_PATHWAY	hsa00020:Citrate cycle (TCA cycle)	8	1.28411	0.000768692	P11498, P11177, P40926, P53396, P07954, P48735, Q99798, P09622	261	31	5085	5.02781	0.102756	0.0098086	0.904347
INTERPRO	IPR001715:Calponin-like actin-binding	10	1.60514	0.000772082	P46940, P12814, Q8IVL0, Q15149, Q8WXH0, P37802, O43707, P13797, O75369, Q5HY54	590	70	16659	4.03366	0.595238	0.0255106	1.23716
UP_SEQ_FEATURE	compositionally biased region:Ser-rich	28	4.49438	0.000781332	Q9UGU0, Q8IVL0, O95996, Q96RY5, Q96PV6, Q8IWY7, Q7LBC6, Q9UQ35, P13645, Q5SYE7, Q8N4U5, O75592, Q9Y6V0, Q9UKA4, Q9NR48, Q9H6A9, O60343, Q92954, Q5T4S7, P20930, Q9UPU5, Q9ULD9, Q6P2E9, Q8WXI7, Q70CQ4, O15018, Q2LD37, Q8NDH2	623	425	19113	2.0212	0.834332	0.0367608	1.35653
SP_PIR_KEYWORDS	pyridoxal phosphate	9	1.44462	0.000829263	P35520, Q9Y617, P23378, P49327, P34897, P11216, P00505, P06737, P04181	623	62	19235	4.48183	0.330149	0.00725898	1.18182
UP_SEQ_FEATURE	domain:Myosin head-like	7	1.1236	0.000841242	P35580, Q7Z406, Q9Y2K3, P35749, P35579, P13535, Q9Y623	623	35	19113	6.13579	0.855673	0.0387334	1.45982
UP_SEQ_FEATURE	compositionally biased region:Poly-Glu	31	4.97592	0.000847088	Q9HC10, Q96PE2, Q12873, P52701, Q92794, Q9ULI0, Q99460, O15355, O95376, P52292, O00148, Q13428, Q00839, Q9BPX3, Q09472, Q8TAQ2, P46100, Q12888, Q9NSI6, Q9P2P6, Q99698, Q96GA3, Q15020, Q99733, P48634, Q9NU22, Q14789, Q12802, Q99613, Q15459	623	494	19113	1.9252	0.857602	0.0382325	1.4699
GOTERM_BP_FAT	GO:0045454~cell redox homeostasis	10	1.60514	0.000854709	P30041, Q15084, P30044, P30048, Q86VQ3, P07237, P09622, P32119, Q13162, Q06830	543	63	13528	3.95451	0.862098	0.0220148	1.48427
UP_SEQ_FEATURE	domain:KH 3	5	0.802568	0.000856915	Q9NZI8, O00425, Q15366, Q15365, Q5T6W2	623	14	19113	10.9568	0.860787	0.0379239	1.48683
SP_PIR_KEYWORDS	cytoskeleton	37	5.939	0.000863034	O95996, Q13045, Q5VYK3, P18206, O60610, O95425, Q92797, P23528, P12814, P33176, O15078, Q8WXH0, O75083, Q9P258, Q9UKA4, Q9Y265, Q9Y266, Q5TB80, O95359, Q5HY54, Q9Y6D9, Q9Y490, Q5T4S7, Q8WUM4, P46060, Q7Z7A1, Q5TZA2, P49454, O75369, Q3KQU3, Q15149, Q9BV73, Q9UI47, Q9UPV0, P67775, O95613, P61158	623	636	19235	1.79618	0.340996	0.00741923	1.22967
GOTERM_BP_FAT	GO:0008652~cellular amino acid biosynthetic process	9	1.44462	0.000877324	P35520, P00367, Q9Y617, Q9BV20, P08243, P31153, P00505, P54886, O43175	543	51	13528	4.39649	0.869143	0.0223427	1.52326
SP_PIR_KEYWORDS	amino-acid biosynthesis	6	0.963082	0.000887317	P35520, Q9Y617, Q9BV20, P08243, P54886, O43175	623	24	19235	7.7187	0.348686	0.00749396	1.26406
GOTERM_CC_FAT	GO:0005583~fibrillar collagen	5	0.802568	0.000891193	P25940, P02458, P02452, P12107, P02461	501	12	12782	10.6304	0.335253	0.00797486	1.26007
GOTERM_MF_FAT	GO:0003724~RNA helicase activity	7	1.1236	0.000893626	Q9NR30, Q92499, Q08211, P38919, Q92900, Q92841, Q13838	524	29	12983	5.98059	0.491293	0.020273	1.3529
GOTERM_CC_FAT	GO:0005739~mitochondrion	64	10.2729	0.000959596	P24752, Q12906, P00367, P36551, P47897, Q07021, Q99714, Q02252, P30153, P48735, Q9HCC0, P38606, P13804, Q06830, P25325, P11498, P40926, P49411, P41250, P04181, P38646, Q6PI48, P11177, P42704, P10809, P62258, P67775, Q8TD19, Q86UT6, O00154, Q9Y277, P43686, O95573, P00505, P30086, Q8N163, P11766, P09622, Q13162, P30837, Q96RQ3, P05091, P61221, P05165, P51398, P30044, Q06124, P30048, O00429, Q00610,…	501	1087	12782	1.50214	0.355774	0.00842024	1.35618
GOTERM_BP_FAT	GO:0048199~vesicle targeting, to, from or within Golgi	5	0.802568	0.000975449	P53621, Q9Y678, P48444, P35606, P53618	543	12	13528	10.3806	0.895777	0.0245424	1.69227
GOTERM_BP_FAT	GO:0016050~vesicle organization	9	1.44462	0.00100114	Q13492, P53621, Q9Y678, O00291, P48444, P35606, Q7Z3T8, Q99698, P53618	543	52	13528	4.31194	0.901806	0.0249107	1.73647
GOTERM_CC_FAT	GO:0044451~nucleoplasm part	38	6.09952	0.00107673	Q12873, Q92794, Q92769, P12956, O75533, Q9Y230, P31946, Q9UQ35, P09874, P78527, P51610, P62136, Q13547, P56545, O14802, Q09028, Q9BWF3, O95163, Q6P2Q9, P38919, Q9Y265, Q8NEV1, Q96T76, Q10570, Q09472, Q8TAQ2, O60907, Q9UMN6, P06748, Q13838, O43172, P33993, Q15020, Q9UNY4, O14980, P11802, O43593, P61326	501	555	12782	1.74683	0.389458	0.0092664	1.52055
SP_PIR_KEYWORDS	peroxidase	6	0.963082	0.00107993	P30041, P30044, P30048, P32119, Q13162, Q06830	623	25	19235	7.40995	0.406601	0.00895771	1.53649
GOTERM_BP_FAT	GO:0006405~RNA export from nucleus	8	1.28411	0.00109508	Q8WUM0, Q8NI27, O00148, P62826, Q92900, P63241, P06748, Q13838	543	41	13528	4.86116	0.92103	0.0269285	1.89794
INTERPRO	IPR001412:Aminoacyl-tRNA synthetase, class I, conserved site	7	1.1236	0.00110023	P56192, P07814, Q9P2J5, P47897, P41252, P54577, P54136	590	34	16659	5.81321	0.724475	0.0351742	1.75862
UP_SEQ_FEATURE	binding site:NAD	8	1.28411	0.00110677	P56545, P00367, P40926, P00338, Q99714, Q02252, P09622, O43175	623	50	19113	4.90864	0.921683	0.0478003	1.91641
GOTERM_MF_FAT	GO:0019899~enzyme binding	37	5.939	0.00118859	P46940, P35520, O60610, Q92769, Q96N67, Q13185, P30086, P49915, P31946, P61981, P17858, Q13547, O00267, O95373, Q09028, P49792, P08670, P30048, Q06124, P52292, Q9UQ80, Q13618, Q9UKA4, Q05996, P23396, Q9BZ29, Q5HY54, Q9P212, P18669, Q9UJY4, Q96P70, Q9BV73, P62258, P63244, Q04917, O43593, O00410	524	523	12983	1.75285	0.593069	0.0260978	1.79569
GOTERM_MF_FAT	GO:0000049~tRNA binding	6	0.963082	0.00123832	P56192, Q08J23, P05455, P49588, P54577, Q9HAV4	524	21	12983	7.07906	0.6081	0.0264093	1.87015
GOTERM_CC_FAT	GO:0016581~NuRD complex	5	0.802568	0.00124772	Q13547, Q09028, Q12873, Q92769, Q8NEV1	501	13	12782	9.81268	0.435499	0.0105333	1.76003
GOTERM_BP_FAT	GO:0006084~acetyl-CoA metabolic process	7	1.1236	0.00125892	Q13085, P11177, P40926, P07954, P48735, Q99798, P09622	543	31	13528	5.62562	0.945999	0.0305734	2.17895
GOTERM_BP_FAT	GO:0022403~cell cycle phase	31	4.97592	0.0012721	Q12906, Q9UJX3, P52701, Q96PY6, P53350, P52292, Q13618, P62826, Q9P258, Q9Y265, Q5TB80, Q9Y266, O95359, O14578, Q9BPX3, Q9Y6D9, Q92878, Q29RF7, P18754, Q14008, P49454, P52732, P35579, Q2NKX8, Q15021, Q14204, O95347, Q8TD19, P11802, Q9UPV0, O95613	543	414	13528	1.8655	0.947626	0.0305687	2.20154
SP_PIR_KEYWORDS	nad	16	2.56822	0.00127439	P00367, P40926, P00338, P49327, Q02252, Q99714, P11766, P09874, P09622, O43175, P30837, P05091, P56545, P40939, Q460N5, Q9Y277	623	189	19235	2.61374	0.459858	0.0103851	1.81082
GOTERM_CC_FAT	GO:0031410~cytoplasmic vesicle	42	6.74157	0.00135088	Q9HC10, Q5VYK3, Q9BTT0, O00291, P35606, P30086, P31946, P09622, Q4VCS5, P08133, P12814, P30041, Q13492, P53621, Q7KZF4, Q9Y678, P14625, P50991, Q9Y6V0, P62826, Q00610, O43707, P05023, P35749, Q06830, P63104, P27824, P20930, Q8WUM4, P49327, P41250, Q15084, P42356, Q14697, Q9UBF2, P62258, P10809, P07237, P48444, O95782, Q10567, P53618	501	642	12782	1.66907	0.461582	0.0111936	1.90424
SMART	SM00185:ARM	7	1.1236	0.0014352	O00629, P52294, O60684, O95996, Q14974, Q92616, P52292	311	37	9079	5.52299	0.257179	0.0292924	1.79402
UP_SEQ_FEATURE	repeat:WD 4	19	3.04976	0.00152086	P55735, Q9Y3F4, Q9BQ67, Q9ULV4, Q2TAY7, Q9NSI6, Q9UMS4, Q15751, O60907, P35606, Q99698, O43172, P53621, Q13347, Q6P2E9, Q09028, O75083, P63244, P50851	623	251	19113	2.32231	0.969822	0.0639156	2.62447
GOTERM_MF_FAT	GO:0008186~RNA-dependent ATPase activity	6	0.963082	0.00155006	Q9NR30, Q08211, P38919, Q92900, Q92841, Q13838	524	22	12983	6.75729	0.690486	0.0320515	2.33578
GOTERM_CC_FAT	GO:0031982~vesicle	43	6.90209	0.00165468	Q9HC10, Q5VYK3, Q9BTT0, O00291, P04075, P35606, P30086, P31946, P09622, Q4VCS5, P08133, P12814, P30041, Q13492, P53621, Q7KZF4, Q9Y678, P14625, P50991, P62826, Q9Y6V0, Q00610, O43707, P05023, P35749, Q06830, P63104, P27824, P20930, Q8WUM4, P49327, P41250, Q15084, P42356, Q14697, Q9UBF2, P62258, P10809, P07237, P48444, O95782, Q10567, P53618	501	670	12782	1.6374	0.531619	0.0134528	2.32783
GOTERM_BP_FAT	GO:0022618~ribonucleoprotein complex assembly	10	1.60514	0.0016554	O14744, Q92499, O94906, O75643, Q14152, Q15459, P62263, P56537, P06748, Q2NL82	543	69	13528	3.61064	0.978479	0.039198	2.85588
SMART	SM00242:MYSc	7	1.1236	0.00165623	P35580, Q7Z406, Q9Y2K3, P35749, P35579, P13535, Q9Y623	311	38	9079	5.37764	0.29045	0.0307116	2.06766
SP_PIR_KEYWORDS	glutamine amidotransferase	4	0.642055	0.00166865	P17812, Q06210, P08243, P49915	623	8	19235	15.4374	0.553641	0.0133539	2.36482
SP_PIR_KEYWORDS	nuclear pore complex	7	1.1236	0.0016789	Q5SRE5, Q8WUM0, P49792, Q9UIA9, Q8N1F7, P35658, P63241	623	40	19235	5.40309	0.55585	0.0132167	2.37919
GOTERM_BP_FAT	GO:0030029~actin filament-based process	21	3.37079	0.00169172	P60953, Q96PE2, O60610, Q9Y490, Q01518, P04075, P27797, Q96P48, Q16643, P23528, O75369, P35579, Q4VCS5, P12814, P35580, Q7Z406, O43707, P13797, P35749, Q9Y623, Q5HY54	543	241	13528	2.17088	0.980219	0.0396367	2.91766
UP_SEQ_FEATURE	domain:IBB	4	0.642055	0.00169948	O00629, P52294, O60684, P52292	623	8	19113	15.3395	0.980002	0.0698847	2.92841
UP_SEQ_FEATURE	region of interest:Nonhelical region	4	0.642055	0.00169948	P25940, P12110, P12107, A6NMZ7	623	8	19113	15.3395	0.980002	0.0698847	2.92841
UP_SEQ_FEATURE	domain:Collagen-like 5	4	0.642055	0.00169948	Q86Y22, Q2UY09, Q17RW2, Q8NFW1	623	8	19113	15.3395	0.980002	0.0698847	2.92841
UP_SEQ_FEATURE	domain:Collagen-like 4	4	0.642055	0.00169948	Q86Y22, Q2UY09, Q17RW2, Q8NFW1	623	8	19113	15.3395	0.980002	0.0698847	2.92841
UP_SEQ_FEATURE	active site:For GATase activity	4	0.642055	0.00169948	P17812, Q06210, P08243, P49915	623	8	19113	15.3395	0.980002	0.0698847	2.92841
INTERPRO	IPR000225:Armadillo	7	1.1236	0.00173875	O00629, P52294, O60684, O95996, Q14974, Q92616, P52292	590	37	16659	5.34187	0.869692	0.0535878	2.7659
SP_PIR_KEYWORDS	mitochondrion	44	7.0626	0.00174224	P24752, P00367, P36551, Q07021, Q99714, Q02252, O95573, P00505, P48735, P09622, P30837, P05091, Q96RQ3, P61221, P05165, Q9HCC0, P51398, P30044, P30048, P13804, P11498, P25325, Q9BYT8, P40926, P49411, P23378, P34897, P54886, P19367, P38646, P04181, Q6PI48, P11177, P31930, P42704, P10809, P30084, P40939, Q86UT6, P25705, P07954, Q99798, O00154, Q9Y277	623	832	19235	1.6328	0.569255	0.0134926	2.46791
SP_PIR_KEYWORDS	Isomerase	12	1.92616	0.0017762	Q15185, Q06210, P62937, Q15084, P60174, Q9BV20, P18669, P49792, Q02790, P07237, P14174, Q08752	623	120	19235	3.08748	0.576274	0.0135372	2.51544
GOTERM_BP_FAT	GO:0046112~nucleobase biosynthetic process	5	0.802568	0.00185041	P22102, P60891, P07741, P49915, P11172	543	14	13528	8.89766	0.986314	0.0428446	3.18719
GOTERM_CC_FAT	GO:0005832~chaperonin-containing T-complex	4	0.642055	0.00185098	P40227, P17987, P50991, Q99832	501	7	12782	14.5788	0.571957	0.0147763	2.60061
GOTERM_BP_FAT	GO:0009156~ribonucleoside monophosphate biosynthetic process	6	0.963082	0.00187149	P22102, P60891, P30520, P49915, P31939, P11172	543	23	13528	6.49916	0.986967	0.0428943	3.22294
GOTERM_BP_FAT	GO:0009112~nucleobase metabolic process	6	0.963082	0.00187149	P22102, P60891, P07741, Q02252, P49915, P11172	543	23	13528	6.49916	0.986967	0.0428943	3.22294
SMART	SM00320:WD40	20	3.21027	0.00189484	P55735, Q9Y3F4, Q9BQ67, Q9ULV4, Q2TAY7, Q9NSI6, Q9UMS4, Q15751, O60907, P35606, Q99698, O43172, P53621, Q13347, Q6P2E9, Q09028, O75083, P63244, P50851, P35658	311	266	9079	2.19496	0.324704	0.0321876	2.36228
INTERPRO	IPR001609:Myosin head, motor region	7	1.1236	0.00200407	P35580, Q7Z406, Q9Y2K3, P35749, P35579, P13535, Q9Y623	590	38	16659	5.20129	0.904546	0.0599468	3.18157
GOTERM_MF_FAT	GO:0031406~carboxylic acid binding	15	2.4077	0.00201297	P11498, P00367, P49327, Q02252, P31946, P06737, P11766, P09622, Q96RQ3, P05165, Q13085, P62258, O00763, P40939, O00154	524	144	12983	2.58091	0.782018	0.0403354	3.0234
GOTERM_MF_FAT	GO:0008139~nuclear localization sequence binding	4	0.642055	0.00201474	P52294, Q14974, Q92973, P52292	524	7	12983	14.1581	0.78231	0.039329	3.02602
GOTERM_CC_FAT	GO:0001725~stress fiber	6	0.963082	0.00205783	P35580, Q7Z406, O43707, P35749, P35579, Q4VCS5	501	24	12782	6.37824	0.610721	0.016135	2.88731
GOTERM_CC_FAT	GO:0031965~nuclear membrane	10	1.60514	0.00209037	Q8IVL0, Q14573, P42704, Q8WXH0, Q13185, P42166, P37802, P43243, P12004, P56537	501	73	12782	3.49493	0.61649	0.0161127	2.93232
GOTERM_CC_FAT	GO:0015629~actin cytoskeleton	22	3.5313	0.00210595	P46940, P18206, Q01518, O95425, Q9ULV4, P04075, Q9Y2K3, P23528, Q16643, O75369, P35579, Q4VCS5, P13535, P35580, Q9UI47, Q7Z406, O43707, Q5T1M5, P61158, P35749, Q9Y623, Q5HY54	501	269	12782	2.08656	0.619223	0.0159636	2.95388
GOTERM_MF_FAT	GO:0043021~ribonucleoprotein binding	7	1.1236	0.00213351	O76094, O14744, Q9UHB9, P56537, P63241, P06748, P62136	524	34	12983	5.10109	0.801041	0.0405561	3.2017
SP_PIR_KEYWORDS	dna replication	10	1.60514	0.00214931	P33993, P49321, P33991, P23921, Q09028, P49643, P49736, P12004, Q14566, P25205	623	88	19235	3.5085	0.646275	0.0161069	3.03631
INTERPRO	IPR002652:Importin-alpha-like, importin-beta-binding region	4	0.642055	0.00215571	O00629, P52294, O60684, P52292	590	8	16659	14.1178	0.920107	0.0627418	3.41842
UP_SEQ_FEATURE	repeat:ARM 5	6	0.963082	0.00223079	O00629, P52294, O60684, O95996, Q7Z7L7, P52292	623	29	19113	6.34737	0.994122	0.0891636	3.82722
GOTERM_MF_FAT	GO:0019842~vitamin binding	14	2.24719	0.0022384	P11498, P35520, Q9Y617, P23378, P34897, P49327, P00505, P06737, P04181, Q96RQ3, P05165, Q13085, O00763, P11216	524	130	12983	2.66826	0.81624	0.0414688	3.3566
SP_PIR_KEYWORDS	extracellular matrix	18	2.88925	0.00226911	Q02388, P25940, P12110, Q5TAT6, Q96RW7, P08572, P27797, P02452, Q8NFW1, A6NMZ7, P02461, Q9UMD9, P02462, Q2UY09, P02458, Q14993, P12107, Q05996	623	241	19235	2.306	0.666204	0.0167387	3.20299
GOTERM_CC_FAT	GO:0005815~microtubule organizing center	21	3.37079	0.00230125	Q13045, Q5VYK3, Q9Y6D9, P17987, Q8WUM4, Q7Z7A1, Q14008, Q5TZA2, P06748, P15531, P25205, P53350, P22392, Q08211, O15078, Q9BV73, Q9UPV0, Q9UKA4, O95613, Q9Y265, Q5TB80, O95359	501	253	12782	2.11768	0.651873	0.0171494	3.22366
GOTERM_MF_FAT	GO:0005201~extracellular matrix structural constituent	11	1.76565	0.00233984	P25940, P12110, Q5TAT6, Q17RW2, P02458, P08572, P02452, Q14993, P12107, P02461, P02462	524	86	12983	3.16912	0.829835	0.0422752	3.50619
UP_SEQ_FEATURE	repeat:RCC1 5	5	0.802568	0.00236195	O75592, Q8TD19, Q15751, P18754, Q9P258	623	18	19113	8.52194	0.995656	0.092556	4.04788
PIR_SUPERFAMILY	PIRSF005673:pendulin	4	0.642055	0.00242208	O00629, P52294, O60684, P52292	319	7	7396	13.2485	0.546408	0.123448	3.22834
GOTERM_BP_FAT	GO:0048255~mRNA stabilization	5	0.802568	0.00244407	Q15717, Q08211, Q9NZI8, Q00839, O60506	543	15	13528	8.30448	0.996552	0.055121	4.18927
GOTERM_BP_FAT	GO:0043489~RNA stabilization	5	0.802568	0.00244407	Q15717, Q08211, Q9NZI8, Q00839, O60506	543	15	13528	8.30448	0.996552	0.055121	4.18927
INTERPRO	IPR019781:WD40 repeat, subgroup	19	3.04976	0.00246632	P55735, Q9Y3F4, Q9BQ67, Q9ULV4, Q2TAY7, Q9NSI6, Q9UMS4, Q15751, O60907, P35606, Q99698, O43172, P53621, Q13347, Q6P2E9, Q09028, O75083, P63244, P50851	590	242	16659	2.21684	0.944514	0.0697396	3.90183
UP_SEQ_FEATURE	glycosylation site:O-linked (Gal...)	4	0.642055	0.00248779	Q02388, P02458, P02452, P02461	623	9	19113	13.6351	0.99675	0.0956236	4.25915
UP_SEQ_FEATURE	repeat:WD 3	19	3.04976	0.00275519	P55735, Q9Y3F4, Q9BQ67, Q9ULV4, Q2TAY7, Q9NSI6, Q9UMS4, Q15751, O60907, P35606, Q99698, O43172, P53621, Q13347, Q6P2E9, Q09028, O75083, P63244, P50851	623	265	19113	2.19962	0.998246	0.103636	4.70662
GOTERM_BP_FAT	GO:0009161~ribonucleoside monophosphate metabolic process	6	0.963082	0.00276607	P22102, P60891, P30520, P49915, P31939, P11172	543	25	13528	5.97923	0.998368	0.0615664	4.72869
INTERPRO	IPR001440:Tetratricopeptide TPR-1	11	1.76565	0.00281763	O76094, P49321, Q9UJX3, Q99615, O94906, P49792, Q02790, P31948, Q9H3U1, Q08752, Q7Z494	590	100	16659	3.10592	0.963268	0.0774262	4.44586
INTERPRO	IPR019782:WD40 repeat 2	18	2.88925	0.00284356	P55735, Q9Y3F4, Q9BQ67, Q9ULV4, Q2TAY7, Q9NSI6, Q9UMS4, Q15751, O60907, P35606, Q99698, O43172, Q13347, Q6P2E9, P53621, Q09028, O75083, P63244	590	226	16659	2.24885	0.964369	0.0763241	4.48589
SP_PIR_KEYWORDS	gluconeogenesis	5	0.802568	0.0028494	P11498, P60174, P18669, P00558, P04075	623	19	19235	8.12495	0.747974	0.0206657	4.00664
GOTERM_BP_FAT	GO:0010605~negative regulation of macromolecule metabolic process	46	7.38363	0.00285723	Q9UJX3, Q12906, P43686, Q13200, P52701, P26358, Q92794, Q92769, Q13185, P06733, P27797, P30153, P30086, Q99460, P31946, O14929, Q13547, P56545, P27348, Q7KZF4, O00267, Q9UQ80, Q9HAV4, P38919, O00425, P62263, P23396, Q13263, Q5HY54, Q8TAQ2, O60907, Q9NZI8, P49454, P06748, P28074, Q9BXP5, P62258, P67775, Q15008, P51665, O43593, O00231, P49721, P62191, Q13127, O00232	543	734	13528	1.56133	0.998679	0.0629296	4.88088
GOTERM_CC_FAT	GO:0005838~proteasome regulatory particle	4	0.642055	0.00287585	Q13200, P51665, Q99460, O00232	501	8	12782	12.7565	0.732608	0.0210501	4.01337
GOTERM_CC_FAT	GO:0070822~Sin3-type complex	4	0.642055	0.00287585	Q13547, Q09028, Q92769, Q8NEV1	501	8	12782	12.7565	0.732608	0.0210501	4.01337
GOTERM_CC_FAT	GO:0016580~Sin3 complex	4	0.642055	0.00287585	Q13547, Q09028, Q92769, Q8NEV1	501	8	12782	12.7565	0.732608	0.0210501	4.01337
UP_SEQ_FEATURE	repeat:RCC1 4	5	0.802568	0.0029156	O75592, Q8TD19, Q15751, P18754, Q9P258	623	19	19113	8.07341	0.998788	0.107586	4.9741
SP_PIR_KEYWORDS	blocked amino end	10	1.60514	0.00291752	P15880, P61204, P12110, P22392, P00558, P13489, P18754, P23396, Q5HY54, P15531, P02462	623	92	19235	3.35596	0.756155	0.0208427	4.10058
GOTERM_BP_FAT	GO:0043632~modification-dependent macromolecule catabolic process	38	6.09952	0.0029603	Q9UJX3, Q16531, Q96G74, P43686, Q5VYK3, Q9C0C9, O75155, Q13200, Q99460, Q86VP6, O95376, P14625, P49792, P45974, O75592, Q13564, Q13618, P55072, Q9UBT2, Q7Z7L7, Q5T4S7, P22314, Q9UPU5, Q15751, O60907, Q7Z6Z7, Q93009, Q70CQ2, Q86UV5, P28074, Q70CQ4, Q15008, P51665, O00231, P49721, P62191, O00232	543	574	13528	1.64932	0.998961	0.064516	5.05269
GOTERM_BP_FAT	GO:0019941~modification-dependent protein catabolic process	38	6.09952	0.0029603	Q9UJX3, Q16531, Q96G74, P43686, Q5VYK3, Q9C0C9, O75155, Q13200, Q99460, Q86VP6, O95376, P14625, P49792, P45974, O75592, Q13564, Q13618, P55072, Q9UBT2, Q7Z7L7, Q5T4S7, P22314, Q9UPU5, Q15751, O60907, Q7Z6Z7, Q93009, Q70CQ2, Q86UV5, P28074, Q70CQ4, Q15008, P51665, O00231, P49721, P62191, O00232	543	574	13528	1.64932	0.998961	0.064516	5.05269
GOTERM_BP_FAT	GO:0044271~nitrogen compound biosynthetic process	25	4.01284	0.00297948	P17812, P35520, P00367, P36551, P31153, P30520, P04075, P07741, P00505, P49915, P11172, O43175, P16615, Q9BV20, P22392, P22102, P08243, P38606, P05023, Q9Y617, P54886, P31939, P15531, P23921, P60891, P25705	543	325	13528	1.91642	0.999006	0.0643168	5.08461
GOTERM_CC_FAT	GO:0032432~actin filament bundle	6	0.963082	0.00298611	P35580, Q7Z406, O43707, P35749, P35579, Q4VCS5	501	26	12782	5.88761	0.745813	0.0215064	4.16422
INTERPRO	IPR001680:WD40 repeat	20	3.21027	0.00298965	P55735, Q9Y3F4, Q9BQ67, Q9ULV4, Q2TAY7, Q9NSI6, Q9UMS4, Q15751, O60907, P35606, Q99698, O43172, P53621, Q13347, Q6P2E9, Q09028, O75083, P63244, P50851, P35658	590	266	16659	2.12298	0.969987	0.0783022	4.71119
UP_SEQ_FEATURE	repeat:ARM 4	6	0.963082	0.00302557	O00629, P52294, O60684, O95996, Q7Z7L7, P52292	623	31	19113	5.93787	0.99906	0.109664	5.15708
INTERPRO	IPR012335:Thioredoxin fold	11	1.76565	0.00303094	P30041, P26641, Q15084, P30044, P09211, P30048, Q86VQ3, P07237, P32119, Q13162, Q06830	590	101	16659	3.07516	0.971408	0.0776096	4.77476
UP_SEQ_FEATURE	sequence variant	424	68.0578	0.00304721	P46940, P55735, Q13200, P07741, Q8NCU4, P53621, P13645, Q8WXH0, Q9BYB0, Q13564, Q6NT89, Q00839, Q9BZZ5, P54577, O75369, P28074, Q8WXI7, Q9P2E9, Q9BV73, Q2LD37, P67775, O95782, P83859, P13797, A6NHR9, Q9Y6G9, P40227, Q8IWJ2, Q9BQ67, Q9ULI0, P11766, P51398, Q2UY09, O75083, O75081, Q6P2Q9, Q8IWI9, P55072, Q92900, Q96P48, Q06190, Q8NFW1, P19367, P07814, Q8IVF2, Q8N944, P14618, P07954, Q8IVL0, O75155,…	623	11992	19113	1.08471	0.999106	0.108696	5.19304
GOTERM_BP_FAT	GO:0006563~L-serine metabolic process	4	0.642055	0.00307999	P35520, Q9Y617, P34897, O43175	543	8	13528	12.4567	0.999213	0.065805	5.25183
UP_SEQ_FEATURE	region of interest:Ran-GTP binding	3	0.481541	0.00310365	Q14974, O60518, O00410	623	3	19113	30.679	0.999215	0.108914	5.28678
UP_SEQ_FEATURE	repeat:HEAT 26	3	0.481541	0.00310365	Q5VYK3, O75155, Q86VP6	623	3	19113	30.679	0.999215	0.108914	5.28678
UP_SEQ_FEATURE	repeat:HEAT 25	3	0.481541	0.00310365	Q5VYK3, O75155, Q86VP6	623	3	19113	30.679	0.999215	0.108914	5.28678
INTERPRO	IPR004154:Anticodon-binding	4	0.642055	0.003149	P07814, P26639, P12081, P41250	590	9	16659	12.5492	0.97511	0.0787956	4.95636
GOTERM_BP_FAT	GO:0006270~DNA replication initiation	5	0.802568	0.0031566	P33993, P33991, P49736, Q14566, P25205	543	16	13528	7.78545	0.999341	0.0667738	5.37908
UP_SEQ_FEATURE	repeat:LRR 13	9	1.44462	0.00324189	Q13045, Q8WXI7, P13489, Q6F5E8, Q14160, Q8WXH0, Q5CZC0, Q7Z7A1	623	76	19113	3.63304	0.999429	0.11179	5.51603
GOTERM_CC_FAT	GO:0022625~cytosolic large ribosomal subunit	7	1.1236	0.00330683	P36578, P05386, P46777, P62424, P05388, Q02878, P47914	501	38	12782	4.69976	0.780639	0.023425	4.60175
GOTERM_BP_FAT	GO:0016568~chromatin modification	22	3.5313	0.00343641	O14744, Q12873, P26358, Q09472, Q92794, Q8TAQ2, Q92769, Q13185, Q7LBC6, Q9UMN6, Q9Y230, Q7Z6Z7, O14929, P49321, Q13547, O00267, Q09028, Q9BWF3, Q9Y4C1, Q9UKL0, Q9NR48, Q9Y265	543	274	13528	2.00035	0.999656	0.0718306	5.8425
BIOCARTA	h_ranPathway:Cycling of Ran in nucleocytoplasmic transport	4	0.642055	0.00351056	P49792, P18754, P46060, P62826	86	6	1437	11.1395	0.3647	0.140341	4.00727
GOTERM_BP_FAT	GO:0051603~proteolysis involved in cellular protein catabolic process	39	6.26003	0.00354208	Q9UJX3, Q16531, Q96G74, P43686, Q5VYK3, Q9C0C9, O75155, Q13200, Q99460, Q86VP6, O95376, P14625, P49792, P45974, O75592, Q13564, Q13618, P55072, Q9UBT2, Q7Z7L7, Q5T4S7, P22314, Q9UPU5, Q15751, O60907, Q7Z6Z7, P35579, Q93009, Q70CQ2, Q86UV5, P28074, Q70CQ4, Q15008, P51665, O00231, P49721, P62191, O00232	543	600	13528	1.61937	0.999731	0.0733002	6.01694
UP_SEQ_FEATURE	repeat:RCC1 1	5	0.802568	0.00355177	O75592, Q8TD19, Q15751, P18754, Q9P258	623	20	19113	7.66974	0.999721	0.120031	6.02799
UP_SEQ_FEATURE	repeat:RCC1 3	5	0.802568	0.00355177	O75592, Q8TD19, Q15751, P18754, Q9P258	623	20	19113	7.66974	0.999721	0.120031	6.02799
UP_SEQ_FEATURE	repeat:RCC1 2	5	0.802568	0.00355177	O75592, Q8TD19, Q15751, P18754, Q9P258	623	20	19113	7.66974	0.999721	0.120031	6.02799
INTERPRO	IPR012996:Zinc finger, CHHC-type	3	0.481541	0.00365609	P55795, P52597, P31943	590	3	16659	28.2356	0.986283	0.0890269	5.73261
KEGG_PATHWAY	hsa04114:Oocyte meiosis	14	2.24719	0.00373683	Q9UJX3, Q14573, P30154, Q9H2G2, P30153, P31946, P61981, P62136, P53350, P27348, P62258, P67775, Q04917, P63104	261	110	5085	2.47962	0.410145	0.0430364	4.32647
INTERPRO	IPR013026:Tetratricopeptide region	12	1.92616	0.00374496	O76094, P49321, O00170, Q9UJX3, Q99615, P49792, Q02790, P31948, Q9H3U1, Q2NKX8, Q08752, Q7Z494	590	121	16659	2.80022	0.987644	0.0892442	5.86804
GOTERM_MF_FAT	GO:0016860~intramolecular oxidoreductase activity	7	1.1236	0.00382307	Q15185, Q15084, P60174, Q9BV20, P30046, P07237, P14174	524	38	12983	4.56413	0.944744	0.066624	5.66894
GOTERM_MF_FAT	GO:0035258~steroid hormone receptor binding	7	1.1236	0.00382307	Q96T76, Q9Y4C1, O94906, Q02790, P27797, Q04917, P62826	524	38	12983	4.56413	0.944744	0.066624	5.66894
GOTERM_BP_FAT	GO:0044257~cellular protein catabolic process	39	6.26003	0.00389016	Q9UJX3, Q16531, Q96G74, P43686, Q5VYK3, Q9C0C9, O75155, Q13200, Q99460, Q86VP6, O95376, P14625, P49792, P45974, O75592, Q13564, Q13618, P55072, Q9UBT2, Q7Z7L7, Q5T4S7, P22314, Q9UPU5, Q15751, O60907, Q7Z6Z7, P35579, Q93009, Q70CQ2, Q86UV5, P28074, Q70CQ4, Q15008, P51665, O00231, P49721, P62191, O00232	543	603	13528	1.61132	0.99988	0.0795143	6.58943
UP_SEQ_FEATURE	repeat:WD 2	19	3.04976	0.00391126	P55735, Q9Y3F4, Q9BQ67, Q9ULV4, Q2TAY7, Q9NSI6, Q9UMS4, Q15751, O60907, P35606, Q99698, O43172, P53621, Q13347, Q6P2E9, Q09028, O75083, P63244, P50851	623	274	19113	2.12737	0.999878	0.129485	6.61863
UP_SEQ_FEATURE	repeat:WD 1	19	3.04976	0.00391126	P55735, Q9Y3F4, Q9BQ67, Q9ULV4, Q2TAY7, Q9NSI6, Q9UMS4, Q15751, O60907, P35606, Q99698, O43172, P53621, Q13347, Q6P2E9, Q09028, O75083, P63244, P50851	623	274	19113	2.12737	0.999878	0.129485	6.61863
UP_SEQ_FEATURE	compositionally biased region:Poly-Gln	13	2.08668	0.00391339	Q8IVL0, Q9UGU0, Q09472, Q96PE2, Q8TAQ2, P46100, Q9NSI6, Q96PV6, Q9UMN6, P23246, Q93009, P48634, Q15459	623	151	19113	2.64124	0.999879	0.127719	6.62212
BIOCARTA	h_ranMSpathway:Role of Ran in mitotic spindle regulation	5	0.802568	0.00391963	Q14974, P52292, P18754, P46060, P62826	86	12	1437	6.96221	0.397475	0.118964	4.46455
INTERPRO	IPR009091:Regulator of chromosome condensation/beta-lactamase-inhibitor protein II	5	0.802568	0.00392524	O75592, Q8TD19, Q15751, P18754, Q9P258	590	19	16659	7.43042	0.990003	0.0914886	6.1422
SP_PIR_KEYWORDS	wd repeat	19	3.04976	0.00394997	P55735, Q9Y3F4, Q9BQ67, Q9ULV4, Q2TAY7, Q9NSI6, Q9UMS4, Q15751, O60907, P35606, Q99698, O43172, P53621, Q13347, Q6P2E9, Q09028, O75083, P63244, P50851	623	276	19235	2.12544	0.852158	0.0277205	5.51382
SP_PIR_KEYWORDS	chromatin regulator	16	2.56822	0.00404866	O14744, Q12873, P26358, Q92794, Q92769, Q8TAQ2, Q13185, Q7LBC6, Q9UMN6, Q9Y230, Q13547, Q09028, Q9Y4C1, Q9NR48, Q9Y265, Q9UKL0	623	213	19235	2.31923	0.859067	0.0279987	5.64789
GOTERM_BP_FAT	GO:0009260~ribonucleotide biosynthetic process	13	2.08668	0.00408703	P17812, P22392, P22102, P60891, P38606, P30520, P04075, P25705, P49915, P31939, P05023, P11172, P16615, P15531	543	124	13528	2.61189	0.999924	0.082648	6.91177
UP_SEQ_FEATURE	repeat:WD 5	17	2.72873	0.00413294	P55735, Q9Y3F4, Q9BQ67, Q2TAY7, Q9NSI6, Q15751, Q9UMS4, O60907, P35606, Q99698, O43172, Q13347, P53621, Q09028, O75083, P63244, P50851	623	233	19113	2.23838	0.999927	0.132527	6.98111
GOTERM_BP_FAT	GO:0033554~cellular response to stress	37	5.939	0.00413431	Q16531, P52701, Q92769, P12956, Q96QE3, Q9UMS4, P31947, Q9Y230, P23246, P09874, P78527, P30041, Q96PY6, Q9BWF3, Q08211, P30044, P08243, P30048, Q06124, Q13564, P32119, P55072, Q92900, P12004, P23396, Q06830, Q96T76, Q92878, P49588, P46100, Q12888, Q9H2G2, P33993, Q9UPV0, Q9P287, P46821	543	566	13528	1.62862	0.999932	0.0828442	6.98903
UP_SEQ_FEATURE	repeat:WD 6	15	2.4077	0.00418447	P55735, Q9Y3F4, Q2TAY7, Q9NSI6, Q15751, Q9UMS4, O60907, P35606, Q99698, O43172, P53621, Q09028, O75083, P63244, P50851	623	192	19113	2.39679	0.999935	0.132232	7.06517
GOTERM_BP_FAT	GO:0046148~pigment biosynthetic process	7	1.1236	0.00425601	P36551, P22102, P30046, P60891, P07741, O14617, P49915	543	39	13528	4.47164	0.999949	0.0844536	7.18762
GOTERM_BP_FAT	GO:0030036~actin cytoskeleton organization	19	3.04976	0.00435841	P60953, Q96PE2, O60610, Q9Y490, Q01518, P04075, P27797, Q96P48, Q16643, P23528, O75369, P35579, Q4VCS5, P12814, P35580, O43707, P13797, P35749, Q5HY54	543	226	13528	2.09449	0.99996	0.0856684	7.35439
GOTERM_BP_FAT	GO:0006974~response to DNA damage stimulus	27	4.33387	0.00441086	Q96T76, Q16531, P52701, Q92878, P46100, P12956, Q12888, Q96QE3, Q9UMS4, P31947, Q9H2G2, Q9Y230, P09874, P23246, P78527, P33993, Q96PY6, Q9BWF3, Q06124, Q9UPV0, Q13564, Q9P287, P12004, Q92900, P55072, P23396	543	373	13528	1.80339	0.999964	0.085929	7.43971
GOTERM_BP_FAT	GO:0009064~glutamine family amino acid metabolic process	8	1.28411	0.00446236	P17812, Q06210, P00367, P08243, P49915, P00505, P54886, O43175	543	52	13528	3.83284	0.999968	0.0861676	7.52341
GOTERM_BP_FAT	GO:0009113~purine base biosynthetic process	4	0.642055	0.0044833	P22102, P60891, P07741, P49915	543	9	13528	11.0726	0.99997	0.0858416	7.55742
INTERPRO	IPR017986:WD40 repeat, region	18	2.88925	0.00483584	P55735, Q9Y3F4, Q9BQ67, Q9ULV4, Q2TAY7, Q9NSI6, Q9UMS4, Q15751, O60907, P35606, Q99698, O43172, Q13347, Q6P2E9, P53621, Q09028, O75083, P63244	590	238	16659	2.13547	0.996574	0.109389	7.51563
GOTERM_CC_FAT	GO:0000118~histone deacetylase complex	7	1.1236	0.00487998	Q13547, Q09028, Q12873, Q92769, O60907, O43593, Q8NEV1	501	41	12782	4.35587	0.893595	0.033882	6.72111
INTERPRO	IPR000629:RNA helicase, ATP-dependent, DEAD-box, conserved site	6	0.963082	0.00495868	Q9NR30, Q92499, O15523, P38919, Q92841, P60842	590	32	16659	5.29417	0.997036	0.1099	7.69945
GOTERM_BP_FAT	GO:0009127~purine nucleoside monophosphate biosynthetic process	5	0.802568	0.00498041	P22102, P60891, P30520, P49915, P31939	543	18	13528	6.9204	0.999991	0.0941446	8.3614
GOTERM_BP_FAT	GO:0009168~purine ribonucleoside monophosphate biosynthetic process	5	0.802568	0.00498041	P22102, P60891, P30520, P49915, P31939	543	18	13528	6.9204	0.999991	0.0941446	8.3614
SP_PIR_KEYWORDS	acetylated amino end	10	1.60514	0.00509402	Q96KK5, P52209, P07954, P14618, P08758, P11766, P00918, P63241, P08133, P63104	623	100	19235	3.08748	0.915135	0.0346249	7.05717
GOTERM_MF_FAT	GO:0051015~actin filament binding	8	1.28411	0.00511231	P12814, P35580, P42704, Q7Z406, O95425, O43707, P35579, Q5HY54	524	53	12983	3.73988	0.979242	0.0861712	7.51193
INTERPRO	IPR015943:WD40/YVTN repeat-like	21	3.37079	0.00511955	P55735, Q8WUM0, Q9Y3F4, Q9BQ67, Q9ULV4, Q2TAY7, Q9NSI6, Q9UMS4, Q15751, O60907, P35606, Q99698, O43172, P53621, Q6P2E9, Q13347, Q09028, O75083, P63244, P50851, P35658	590	300	16659	1.97649	0.997547	0.111171	7.93968
GOTERM_BP_FAT	GO:0006325~chromatin organization	27	4.33387	0.0052083	O14744, Q12873, P26358, Q92769, Q92794, Q96KK5, Q13185, Q7LBC6, Q9Y230, O14929, P49321, Q13547, O00267, Q9BWF3, Q09028, Q9Y4C1, P49736, Q9UKL0, Q9Y265, Q9NR48, Q09472, Q8TAQ2, Q9UMN6, Q7Z6Z7, P06748, Q99733, Q9Y232	543	378	13528	1.77953	0.999994	0.0974537	8.72775
PIR_SUPERFAMILY	PIRSF017194:importin, subunit beta-3	3	0.481541	0.00537179	Q8TEX9, O60518, O00410	319	3	7396	23.185	0.827253	0.221858	7.02956
GOTERM_BP_FAT	GO:0043588~skin development	6	0.963082	0.00541976	P25940, P49588, P31947, P35527, P02452, P02461	543	29	13528	5.15451	0.999997	0.100407	9.06646
GOTERM_BP_FAT	GO:0030199~collagen fibril organization	6	0.963082	0.00541976	P25940, P02458, P02452, P12107, P50454, P02461	543	29	13528	5.15451	0.999997	0.100407	9.06646
GOTERM_MF_FAT	GO:0030170~pyridoxal phosphate binding	8	1.28411	0.00567494	P35520, Q9Y617, P23378, P34897, P11216, P00505, P06737, P04181	524	54	12983	3.67062	0.986465	0.0931549	8.30564
GOTERM_MF_FAT	GO:0070279~vitamin B6 binding	8	1.28411	0.00567494	P35520, Q9Y617, P23378, P34897, P11216, P00505, P06737, P04181	524	54	12983	3.67062	0.986465	0.0931549	8.30564
GOTERM_BP_FAT	GO:0010033~response to organic substance	44	7.0626	0.00582377	Q01581, P31689, P34932, Q92769, P31153, P30153, P30086, P00505, P11766, P23528, P09874, P02461, P78527, P17858, P05091, O00267, P22392, Q9BWF3, Q9Y4C1, P22102, P08243, P30048, Q06124, P09104, P08758, P32119, Q9Y266, P55072, Q96T76, P12110, Q09472, P49588, P02452, P50454, P15531, P01266, Q13085, P31930, Q9BXP5, P10809, P67775, P61158, P46821, P00918, Q92598	543	721	13528	1.52038	0.999999	0.106649	9.71029
SP_PIR_KEYWORDS	myosin	7	1.1236	0.00584206	P35580, Q7Z406, Q9Y2K3, P35749, P35579, P13535, Q9Y623	623	51	19235	4.23772	0.940986	0.0390751	8.05359
UP_SEQ_FEATURE	repeat:ARM 3	6	0.963082	0.00587552	O00629, P52294, O60684, O95996, Q7Z7L7, P52292	623	36	19113	5.11316	0.999999	0.17834	9.78461
GOTERM_BP_FAT	GO:0022613~ribonucleoprotein complex biogenesis	16	2.56822	0.00589507	O14744, Q9Y2L1, P46777, O94906, O75643, P05388, Q14152, P06748, Q2NL82, Q92499, P62424, Q9UQ80, P38919, Q15459, P62263, P56537	543	180	13528	2.21453	0.999999	0.107043	9.82347
SP_PIR_KEYWORDS	tpr repeat	13	2.08668	0.00589845	Q9UJX3, O00170, Q02790, P31948, Q08752, Q2NKX8, P78527, O76094, P49321, Q99615, P49792, Q9H3U1, Q7Z494	623	160	19235	2.50858	0.942581	0.0389087	8.1283
SP_PIR_KEYWORDS	purine biosynthesis	4	0.642055	0.00595124	P22102, P30520, P49915, P31939	623	12	19235	10.2916	0.944035	0.0387239	8.19819
GOTERM_BP_FAT	GO:0032270~positive regulation of cellular protein metabolic process	19	3.04976	0.00597618	Q9UJX3, P43686, Q13200, P26358, Q09472, Q92769, Q96N67, Q99460, P28074, P53350, P11802, Q15008, P51665, P49721, O00231, P62191, P63241, P62701, O00232	543	233	13528	2.03157	0.999999	0.107598	9.95206
SMART	SM00210:TSPN	5	0.802568	0.00599268	P25940, Q17RW2, Q14993, P12107, Q8NFW1	311	22	9079	6.63476	0.711834	0.0912716	7.29635
UP_SEQ_FEATURE	domain:KH 2	5	0.802568	0.00600957	Q9NZI8, O00425, Q15366, Q15365, Q5T6W2	623	23	19113	6.66934	0.999999	0.179674	9.99693
UP_SEQ_FEATURE	binding site:Substrate; via amide nitrogen	5	0.802568	0.00600957	P23921, P30084, P14174, P14618, Q7Z494	623	23	19113	6.66934	0.999999	0.179674	9.99693
UP_SEQ_FEATURE	domain:KH 1	5	0.802568	0.00600957	Q9NZI8, O00425, Q15366, Q15365, Q5T6W2	623	23	19113	6.66934	0.999999	0.179674	9.99693
UP_SEQ_FEATURE	domain:TSP N-terminal	5	0.802568	0.00600957	P25940, Q17RW2, Q14993, P12107, Q8NFW1	623	23	19113	6.66934	0.999999	0.179674	9.99693
UP_SEQ_FEATURE	domain:Collagen-like 3	4	0.642055	0.00605744	Q86Y22, Q2UY09, Q17RW2, Q8NFW1	623	12	19113	10.2263	0.999999	0.178664	10.0726
UP_SEQ_FEATURE	domain:WHEP-TRS	3	0.481541	0.00607341	P56192, P12081, P41250	623	4	19113	23.0092	0.999999	0.176839	10.0979
UP_SEQ_FEATURE	zinc finger region:C6-type	3	0.481541	0.00607341	Q9Y4C1, Q7LBC6, O43593	623	4	19113	23.0092	0.999999	0.176839	10.0979
GOTERM_BP_FAT	GO:0006541~glutamine metabolic process	5	0.802568	0.00611162	P17812, Q06210, P08243, P49915, O43175	543	19	13528	6.55617	0.999999	0.109062	10.1664
GOTERM_BP_FAT	GO:0009259~ribonucleotide metabolic process	14	2.24719	0.00616301	P17812, P04075, P30520, P49915, P31939, P11172, P16615, P15531, P22392, P22102, P38606, P60891, P53396, P25705, P05023	543	147	13528	2.37271	0.999999	0.109093	10.2476
GOTERM_BP_FAT	GO:0042493~response to drug	18	2.88925	0.00619939	Q01581, P17812, P36551, Q09472, Q92769, P31153, P30086, P49454, P15531, O76094, P48681, Q13085, P22392, P40939, P09104, P05023, Q9UHB9, P46821, P63104	543	216	13528	2.07612	0.999999	0.108874	10.305
SMART	SM00028:TPR	11	1.76565	0.00621044	O76094, P49321, O00170, Q9UJX3, Q99615, P49792, Q02790, P31948, Q9H3U1, Q08752, Q7Z494	311	116	9079	2.76829	0.72461	0.087997	7.552
GOTERM_BP_FAT	GO:0051647~nucleus localization	4	0.642055	0.00621562	P35580, P60953, Q9Y266, O95359	543	10	13528	9.96538	0.999999	0.108326	10.3306
GOTERM_BP_FAT	GO:0042255~ribosome assembly	4	0.642055	0.00621562	P62263, P56537, P06748, Q2NL82	543	10	13528	9.96538	0.999999	0.108326	10.3306
GOTERM_CC_FAT	GO:0016585~chromatin remodeling complex	9	1.44462	0.00634235	Q13547, Q09028, Q12873, Q92769, Q8TAQ2, O60907, O43593, P52732, Q8NEV1	501	71	12782	3.23404	0.945744	0.0431917	8.65188
GOTERM_BP_FAT	GO:0030163~protein catabolic process	39	6.26003	0.00636233	Q9UJX3, Q16531, Q96G74, P43686, Q5VYK3, Q9C0C9, O75155, Q13200, Q99460, Q86VP6, O95376, P14625, P49792, P45974, O75592, Q13564, Q13618, P55072, Q9UBT2, Q7Z7L7, Q5T4S7, P22314, Q9UPU5, Q15751, O60907, Q7Z6Z7, P35579, Q93009, Q70CQ2, Q86UV5, P28074, Q70CQ4, Q15008, P51665, O00231, P49721, P62191, O00232	543	622	13528	1.5621	1	0.109922	10.5619
GOTERM_BP_FAT	GO:0044265~cellular macromolecule catabolic process	44	7.0626	0.00636345	Q9UJX3, Q16531, Q96G74, P43686, Q5VYK3, Q9C0C9, O75155, Q13200, Q99460, Q86VP6, P61221, O95376, P14625, P49792, P13489, P45974, O75592, Q13564, Q13618, P38919, Q92900, P55072, Q9UBT2, Q7Z7L7, Q5T4S7, P22314, Q9UPU5, Q15751, O60907, Q7Z6Z7, P35579, Q93009, Q70CQ2, Q86UV5, P28074, Q70CQ4, Q15008, P51665, O00231, P61326, P49721, P62191, O00232	543	725	13528	1.51199	1	0.10913	10.5636
GOTERM_BP_FAT	GO:0007017~microtubule-based process	20	3.21027	0.00649217	Q96N67, P18754, Q14008, O60282, Q5TZA2, Q9P2P6, P52732, P35579, P06748, P33176, P42704, O43896, Q14204, Q9BV73, Q5T7B8, P52292, P62826, O95613, P46821, O95359	543	253	13528	1.96944	1	0.110404	10.766
UP_SEQ_FEATURE	repeat:ARM 2	6	0.963082	0.0066154	O00629, P52294, O60684, O95996, Q7Z7L7, P52292	623	37	19113	4.97497	1	0.188704	10.9507
GOTERM_BP_FAT	GO:0006338~chromatin remodeling	8	1.28411	0.0067454	P49321, Q13547, O00267, Q09028, Q92769, Q8TAQ2, Q13185, Q9UMN6	543	56	13528	3.55906	1	0.113639	11.163
KEGG_PATHWAY	hsa00650:Butanoate metabolism	7	1.1236	0.00676465	Q01581, P24752, P11177, P30084, P40939, P30837, P05091	261	34	5085	4.01116	0.615979	0.0709751	7.70566
INTERPRO	IPR003129:Laminin G, thrombospondin-type, N-terminal	5	0.802568	0.00681229	P25940, Q17RW2, Q14993, P12107, Q8NFW1	590	22	16659	6.41718	0.999666	0.14267	10.432
SP_PIR_KEYWORDS	DNA damage	15	2.4077	0.00701132	Q96T76, Q16531, P52701, Q92878, P46100, Q12888, P12956, Q96QE3, Q9UPV0, Q9UMS4, Q9P287, P23246, P09874, P78527	623	205	19235	2.25913	0.966573	0.0448857	9.59121
INTERPRO	IPR002312:Aspartyl-tRNA synthetase, class IIb	3	0.481541	0.0071409	O43776, P14868, Q6PI48	590	4	16659	21.1767	0.999773	0.14644	10.9085
INTERPRO	IPR015873:Clathrin alpha-adaptin/coatomer adaptor, appendage, C-terminal subdomain	3	0.481541	0.0071409	Q9UBF2, Q9Y678, O95782	590	4	16659	21.1767	0.999773	0.14644	10.9085
INTERPRO	IPR011762:Acetyl-coenzyme A carboxyltransferase, N-terminal	3	0.481541	0.0071409	Q9HCC0, Q13085, O00763	590	4	16659	21.1767	0.999773	0.14644	10.9085
INTERPRO	IPR011763:Acetyl-coenzyme A carboxyltransferase, C-terminal	3	0.481541	0.0071409	Q9HCC0, Q13085, O00763	590	4	16659	21.1767	0.999773	0.14644	10.9085
INTERPRO	IPR000022:Carboxyl transferase	3	0.481541	0.0071409	Q9HCC0, Q13085, O00763	590	4	16659	21.1767	0.999773	0.14644	10.9085
INTERPRO	IPR003959:ATPase, AAA-type, core	7	1.1236	0.0073218	P43686, Q96QE3, Q9ULI0, Q9Y230, Q9Y265, P55072, P62191	590	49	16659	4.03366	0.999817	0.14731	11.1698
GOTERM_BP_FAT	GO:0051726~regulation of cell cycle	24	3.85233	0.00740077	Q16531, Q16543, O14744, Q9Y6G9, P60953, Q9Y6D9, Q92769, Q14160, P31947, P27797, P18754, P30086, P49454, P51610, P06748, Q13547, P08243, P11802, O75592, O14980, Q06124, Q13564, Q9P287	543	331	13528	1.80641	1	0.123119	12.1825
GOTERM_BP_FAT	GO:0009167~purine ribonucleoside monophosphate metabolic process	5	0.802568	0.00740143	P22102, P60891, P30520, P49915, P31939	543	20	13528	6.22836	1	0.122256	12.1835
GOTERM_BP_FAT	GO:0009126~purine nucleoside monophosphate metabolic process	5	0.802568	0.00740143	P22102, P60891, P30520, P49915, P31939	543	20	13528	6.22836	1	0.122256	12.1835
GOTERM_MF_FAT	GO:0042826~histone deacetylase binding	6	0.963082	0.00742392	Q13547, Q09028, P62258, P52292, P31946, O43593	524	31	12983	4.79549	0.996424	0.117668	10.7325
GOTERM_CC_FAT	GO:0030662~coated vesicle membrane	9	1.44462	0.00748976	P53621, Q9UBF2, Q9Y678, O00291, P48444, P35606, O95782, Q00610, P53618	501	73	12782	3.14544	0.968038	0.0500932	10.1407
SP_PIR_KEYWORDS	polymorphism	404	64.8475	0.0075818	P46940, P55735, Q13200, P07741, Q8NCU4, P53621, P13645, Q8WXH0, Q9BYB0, Q13564, Q6NT89, Q00839, Q9BZZ5, P54577, O75369, P28074, Q8WXI7, Q9P2E9, Q9BV73, Q2LD37, P67775, O95782, P83859, P13797, A6NHR9, P40227, Q9Y6G9, Q8IWJ2, Q9BQ67, Q9ULI0, P11766, P51398, Q2UY09, O75083, O75081, Q6P2Q9, Q8IWI9, Q92900, Q96P48, Q06190, Q8NFW1, P19367, P07814, Q8IVF2, Q8N944, P14618, Q8IVL0, O75155, Q6UB98, O95425,…	623	11550	19235	1.07995	0.974675	0.0478311	10.3327
UP_SEQ_FEATURE	repeat:RCC1 6	4	0.642055	0.00768622	Q8TD19, Q15751, P18754, Q9P258	623	13	19113	9.43968	1	0.21323	12.6132
KEGG_PATHWAY	hsa00030:Pentose phosphate pathway	6	0.963082	0.00768783	Q01813, P60891, P52209, P04075, P29401, P17858	261	25	5085	4.67586	0.663168	0.0747826	8.71401
COG_ONTOLOGY	RNA processing and modification	6	0.963082	0.00774884	Q16531, Q15020, Q10570, O75533, Q12996, Q6P2Q9	111	23	1950	4.58284	0.163825	0.0855739	5.97968
GOTERM_CC_FAT	GO:0022624~proteasome accessory complex	4	0.642055	0.00776172	Q13200, P51665, Q99460, O00232	501	11	12782	9.27745	0.971808	0.051128	10.4903
GOTERM_BP_FAT	GO:0031399~regulation of protein modification process	22	3.5313	0.00790301	Q9UJX3, P35520, Q7Z7L7, P43686, Q13200, P26358, Q96N67, P30153, P30086, Q99460, P31946, P28074, P53350, P62258, P67775, Q15008, Q9P219, P51665, P49721, O00231, P62191, O00232	543	295	13528	1.85795	1	0.129098	12.9564
GOTERM_BP_FAT	GO:0007015~actin filament organization	9	1.44462	0.00793535	P12814, O60610, P04075, Q96P48, O43707, P13797, P23528, Q16643, Q5HY54	543	72	13528	3.11418	1	0.12869	13.006
GOTERM_MF_FAT	GO:0042393~histone binding	7	1.1236	0.00798033	Q15021, O95373, Q09028, P18754, O60907, Q96P70, P06748	524	44	12983	3.94175	0.997659	0.12338	11.4918
GOTERM_MF_FAT	GO:0003735~structural constituent of ribosome	15	2.4077	0.00800283	P15880, P36578, P05386, P46777, P05388, P32969, P55795, P62424, Q02878, P47914, P23396, P62263, P26373, P46781, P62701	524	168	12983	2.21221	0.997699	0.121241	11.5224
SP_PIR_KEYWORDS	basement membrane	6	0.963082	0.00807344	Q02388, Q2UY09, Q96RW7, P08572, Q9UMD9, P02462	623	39	19235	4.74997	0.980065	0.0502126	10.9672
GOTERM_BP_FAT	GO:0044092~negative regulation of molecular function	24	3.85233	0.00823831	Q9UJX3, P43686, Q13200, Q92769, P31947, P30153, Q99460, P61981, Q86VP6, P28074, P49796, Q96JM2, P30048, P67775, Q15008, P51665, O43593, P49721, O00231, P23396, P32119, P62191, O00232, Q5HY54	543	334	13528	1.79019	1	0.132361	13.4694
GOTERM_MF_FAT	GO:0048407~platelet-derived growth factor binding	4	0.642055	0.00841866	P02458, P02452, P02461, P02462	524	11	12983	9.00972	0.998324	0.124671	12.0858
GOTERM_MF_FAT	GO:0004601~peroxidase activity	6	0.963082	0.00851374	P30041, P30044, P30048, P32119, Q13162, Q06830	524	32	12983	4.64563	0.998441	0.123586	12.2142
GOTERM_MF_FAT	GO:0016684~oxidoreductase activity, acting on peroxide as acceptor	6	0.963082	0.00851374	P30041, P30044, P30048, P32119, Q13162, Q06830	524	32	12983	4.64563	0.998441	0.123586	12.2142
INTERPRO	IPR019734:Tetratricopeptide repeat	11	1.76565	0.00854418	O76094, P49321, O00170, Q9UJX3, Q99615, P49792, Q02790, P31948, Q9H3U1, Q08752, Q7Z494	590	117	16659	2.65463	0.999957	0.166978	12.9165
GOTERM_BP_FAT	GO:0007051~spindle organization	7	1.1236	0.00868424	Q14204, P18754, P62826, O95613, P52732, P35579, O95359	543	45	13528	3.87542	1	0.138084	14.1473
GOTERM_BP_FAT	GO:0042440~pigment metabolic process	7	1.1236	0.00868424	P36551, P22102, P30046, P60891, P07741, O14617, P49915	543	45	13528	3.87542	1	0.138084	14.1473
GOTERM_BP_FAT	GO:0009057~macromolecule catabolic process	46	7.38363	0.00884006	Q9UJX3, Q16531, Q96G74, P43686, Q5VYK3, Q9C0C9, O75155, Q13200, Q99460, P06737, Q86VP6, P61221, O95376, P14625, P49792, P13489, P45974, O75592, Q13564, P11216, Q13618, P38919, Q92900, P55072, Q9UBT2, Q7Z7L7, Q5T4S7, P22314, Q9UPU5, Q15751, O60907, Q7Z6Z7, P35579, Q93009, Q70CQ2, P28074, Q86UV5, Q70CQ4, Q15008, P51665, O00231, P61326, P49721, P62191, O00232	543	781	13528	1.46737	1	0.13944	14.383
GOTERM_MF_FAT	GO:0051427~hormone receptor binding	10	1.60514	0.0088445	Q96T76, Q9Y4C1, O94906, Q02790, Q06124, P27797, Q04917, P62826, O43593, O95359	524	88	12983	2.81554	0.998789	0.125693	12.6593
GOTERM_BP_FAT	GO:0006417~regulation of translation	13	2.08668	0.00895578	O43432, Q92499, P11802, Q92616, P27797, Q9UQ80, Q9NZI8, P38919, O00425, P61326, Q92900, P63241, P62701	543	137	13528	2.36405	1	0.14019	14.5577
KEGG_PATHWAY	hsa03030:DNA replication	7	1.1236	0.00899552	P33993, P33991, P49643, P49736, P12004, Q14566, P25205	261	36	5085	3.78831	0.72032	0.0814331	10.1251
GOTERM_MF_FAT	GO:0004004~ATP-dependent RNA helicase activity	5	0.802568	0.00902395	Q9NR30, Q08211, P38919, Q92900, Q13838	524	21	12983	5.89922	0.998944	0.125737	12.8999
GOTERM_BP_FAT	GO:0051247~positive regulation of protein metabolic process	19	3.04976	0.00910374	Q9UJX3, P43686, Q13200, P26358, Q09472, Q92769, Q96N67, Q99460, P28074, P53350, P11802, Q15008, P51665, P49721, O00231, P62191, P63241, P62701, O00232	543	243	13528	1.94796	1	0.141395	14.7805
GOTERM_BP_FAT	GO:0007097~nuclear migration	3	0.481541	0.00911007	P35580, P60953, Q9Y266	543	4	13528	18.6851	1	0.14055	14.79
GOTERM_BP_FAT	GO:0006422~aspartyl-tRNA aminoacylation	3	0.481541	0.00911007	O43776, P14868, Q6PI48	543	4	13528	18.6851	1	0.14055	14.79
GOTERM_MF_FAT	GO:0048027~mRNA 5'-UTR binding	3	0.481541	0.0092064	Q9NZI8, O00425, P62263	524	4	12983	18.5825	0.999081	0.125818	13.1439
GOTERM_MF_FAT	GO:0004815~aspartate-tRNA ligase activity	3	0.481541	0.0092064	O43776, P14868, Q6PI48	524	4	12983	18.5825	0.999081	0.125818	13.1439
GOTERM_MF_FAT	GO:0008379~thioredoxin peroxidase activity	3	0.481541	0.0092064	P32119, Q13162, Q06830	524	4	12983	18.5825	0.999081	0.125818	13.1439
INTERPRO	IPR000408:Regulator of chromosome condensation, RCC1	5	0.802568	0.00935966	O75592, Q8TD19, Q15751, P18754, Q9P258	590	24	16659	5.88242	0.999983	0.178513	14.0637
GOTERM_BP_FAT	GO:0006310~DNA recombination	11	1.76565	0.00936648	P62937, Q9BWF3, P52701, Q92878, P10809, P12956, P46100, Q9Y230, P23246, Q9Y265, P78527	543	105	13528	2.60998	1	0.143277	15.1748
UP_SEQ_FEATURE	repeat:ARM 6	5	0.802568	0.00939556	O00629, P52294, O60684, O95996, P52292	623	26	19113	5.8998	1	0.251357	15.2065
SP_PIR_KEYWORDS	oxidoreductase	30	4.81541	0.00939913	P00367, P36551, Q99714, Q02252, Q7LBC6, P48735, O43175, P09622, P11766, Q13162, P30837, P05091, P30041, P56545, P30044, Q9Y4C1, P30048, P32119, Q06830, Q7Z494, P40926, P23378, P00338, P49327, P54886, P23921, P11177, P31930, P52209, P40939	623	562	19235	1.64812	0.989551	0.0575166	12.6572
SP_PIR_KEYWORDS	dna repair	14	2.24719	0.00940562	Q96T76, Q16531, P52701, Q92878, P46100, Q12888, P12956, Q9UPV0, Q9UMS4, Q9P287, P23246, P09874, P78527	623	191	19235	2.26307	0.989584	0.0568389	12.6654
GOTERM_CC_FAT	GO:0034399~nuclear periphery	8	1.28411	0.00944364	Q9Y230, P43243, P23246, Q9Y265, P23528, P49454, P12004, P56537	501	61	12782	3.34596	0.987038	0.0610394	12.6242
GOTERM_BP_FAT	GO:0006406~mRNA export from nucleus	6	0.963082	0.00950068	Q8WUM0, Q8NI27, O00148, Q92900, P63241, Q13838	543	33	13528	4.52972	1	0.144238	15.3756
UP_SEQ_FEATURE	repeat:LRR 12	9	1.44462	0.00958513	Q13045, Q8WXI7, P13489, Q6F5E8, Q14160, Q8WXH0, Q5CZC0, Q7Z7A1	623	91	19113	3.03418	1	0.25284	15.4896
GOTERM_CC_FAT	GO:0030135~coated vesicle	14	2.24719	0.0095951	Q5VYK3, O00291, P35606, P30086, Q13492, P53621, Q9Y678, Q9UBF2, P10809, P48444, O95782, Q9Y6V0, Q00610, P53618	501	159	12782	2.24643	0.987915	0.061134	12.8141
INTERPRO	IPR019775:WD40 repeat, conserved site	19	3.04976	0.00988613	P55735, Q9Y3F4, Q9BQ67, Q9ULV4, Q2TAY7, Q9NSI6, Q9UMS4, Q15751, O60907, P35606, Q99698, O43172, P53621, Q13347, Q6P2E9, Q09028, O75083, P63244, P50851	590	277	16659	1.93674	0.999991	0.184627	14.7969
SP_PIR_KEYWORDS	translocation	8	1.28411	0.00990277	Q5SRE5, Q8WUM0, Q9P2E9, P49792, Q9UIA9, Q8N1F7, P35658, P63241	623	74	19235	3.33782	0.991827	0.0590324	13.2914
INTERPRO	IPR011990:Tetratricopeptide-like helical	13	2.08668	0.0099631	Q9UJX3, O00170, O94906, Q02790, P31948, Q08752, P49321, O76094, Q99615, P49792, Q00610, Q9H3U1, Q7Z494	590	157	16659	2.33798	0.999992	0.183036	14.9036
UP_SEQ_FEATURE	region of interest:Substrate binding	11	1.76565	0.0100626	P11498, P23921, P36551, P00558, Q96KP4, P30084, P06733, P07954, P09104, P41250, P48735	623	130	19113	2.59591	1	0.260732	16.1988
GOTERM_BP_FAT	GO:0043488~regulation of mRNA stability	5	0.802568	0.0104905	Q15717, Q08211, Q9NZI8, Q00839, O60506	543	22	13528	5.66215	1	0.157072	16.8424
GOTERM_BP_FAT	GO:0006903~vesicle targeting	5	0.802568	0.0104905	P53621, Q9Y678, P48444, P35606, P53618	543	22	13528	5.66215	1	0.157072	16.8424
UP_SEQ_FEATURE	repeat:TPR 2	12	1.92616	0.0105414	O76094, P49321, O00170, Q9UJX3, Q99615, Q02790, P31948, Q9H3U1, Q2NKX8, P78527, Q08752, Q7Z494	623	151	19113	2.43806	1	0.268374	16.9041
UP_SEQ_FEATURE	repeat:TPR 1	12	1.92616	0.0105414	O76094, P49321, O00170, Q9UJX3, Q99615, Q02790, P31948, Q9H3U1, Q2NKX8, P78527, Q08752, Q7Z494	623	151	19113	2.43806	1	0.268374	16.9041
SP_PIR_KEYWORDS	manganese	12	1.92616	0.0105674	P11498, Q5T6H7, Q13085, P22102, Q3LXA3, Q96KP4, P67775, O00763, P48735, P28838, O15355, P62136	623	152	19235	2.43748	0.994091	0.0621263	14.1218
GOTERM_BP_FAT	GO:0014823~response to activity	4	0.642055	0.0107344	P31930, P30086, P13535, Q9Y623	543	12	13528	8.30448	1	0.159412	17.2001
UP_SEQ_FEATURE	metal ion-binding site:Manganese 2	5	0.802568	0.0107513	Q5T6H7, Q13085, Q96KP4, O00763, O15355	623	27	19113	5.68129	1	0.269998	17.2116
UP_SEQ_FEATURE	region of interest:Actin-binding	5	0.802568	0.0107513	Q9Y2K3, P35749, P35579, P13535, Q9Y623	623	27	19113	5.68129	1	0.269998	17.2116
UP_SEQ_FEATURE	metal ion-binding site:Manganese 1	5	0.802568	0.0107513	Q5T6H7, Q13085, Q96KP4, O00763, O15355	623	27	19113	5.68129	1	0.269998	17.2116
GOTERM_MF_FAT	GO:0008536~Ran GTPase binding	4	0.642055	0.0108932	O95373, P49792, Q96P70, O00410	524	12	12983	8.25891	0.999747	0.144641	15.3697
GOTERM_MF_FAT	GO:0016209~antioxidant activity	7	1.1236	0.0109724	P30041, P30044, P30048, Q86VQ3, P32119, Q13162, Q06830	524	47	12983	3.69015	0.999761	0.143124	15.4729
GOTERM_CC_FAT	GO:0015935~small ribosomal subunit	8	1.28411	0.0112063	P15880, P51398, P46783, P23396, P62263, P06748, P62701, P46781	501	63	12782	3.23974	0.994267	0.0701169	14.8097
GOTERM_CC_FAT	GO:0005637~nuclear inner membrane	5	0.802568	0.0113372	P42704, Q13185, P43243, P12004, P56537	501	23	12782	5.5463	0.994604	0.0699611	14.97
UP_SEQ_FEATURE	compositionally biased region:Gly-rich	16	2.56822	0.0114028	Q86Y22, Q96G74, P31689, Q13151, P51991, P22626, P14866, Q9UPU5, Q9H6K5, Q8NFW1, Q2TAM9, P13645, Q8N7J2, O75592, Q00839, Q9H6A9	623	238	19113	2.06245	1	0.280871	18.1592
GOTERM_MF_FAT	GO:0008022~protein C-terminus binding	13	2.08668	0.0115613	Q09472, Q9BV73, Q8TAQ2, P12956, P08670, P30048, P67775, O60907, P31946, P16615, P49454, P19338, Q93009	524	141	12983	2.28438	0.999848	0.147721	16.2366
INTERPRO	IPR004364:Aminoacyl-tRNA synthetase, class II (D, K and N)	3	0.481541	0.0116236	O43776, P14868, Q6PI48	590	5	16659	16.9414	0.999999	0.207093	17.1749
INTERPRO	IPR018150:Aminoacyl-tRNA synthetase, class II (D, K and N)-like	3	0.481541	0.0116236	O43776, P14868, Q6PI48	590	5	16659	16.9414	0.999999	0.207093	17.1749
GOTERM_BP_FAT	GO:0022415~viral reproductive process	8	1.28411	0.0116564	P56545, P62937, O00267, P12956, Q8NI27, O43719, P51610, Q13838	543	62	13528	3.21464	1	0.170851	18.5394
GOTERM_MF_FAT	GO:0035257~nuclear hormone receptor binding	9	1.44462	0.0120889	Q96T76, Q9Y4C1, O94906, Q02790, P27797, Q04917, P62826, O43593, O95359	524	77	12983	2.89598	0.999898	0.151423	16.9152
UP_SEQ_FEATURE	domain:IQ	7	1.1236	0.0121239	P35580, Q7Z406, Q9Y2K3, P35749, P35579, P13535, Q9Y623	623	59	19113	3.63988	1	0.292745	19.1961
GOTERM_BP_FAT	GO:0009060~aerobic respiration	6	0.963082	0.0121734	P11177, P31930, P40926, P07954, P48735, Q99798	543	35	13528	4.27088	1	0.176652	19.2814
UP_SEQ_FEATURE	compositionally biased region:Asp/Glu-rich (highly acidic)	5	0.802568	0.0122272	Q9BTT0, O15371, P46060, P06748, Q92688	623	28	19113	5.47839	1	0.29183	19.3435
GOTERM_BP_FAT	GO:0046356~acetyl-CoA catabolic process	5	0.802568	0.0123051	P11177, P40926, P07954, P48735, Q99798	543	23	13528	5.41597	1	0.177292	19.4693
GOTERM_BP_FAT	GO:0006099~tricarboxylic acid cycle	5	0.802568	0.0123051	P11177, P40926, P07954, P48735, Q99798	543	23	13528	5.41597	1	0.177292	19.4693
GOTERM_CC_FAT	GO:0000793~condensed chromosome	12	1.92616	0.0123068	Q9BPX3, Q15021, Q8WUM0, P42704, Q9Y6D9, Q12888, O95347, Q13185, P18754, P46060, P49454, Q2NKX8	501	129	12782	2.3733	0.996557	0.0747503	16.1484
UP_SEQ_FEATURE	domain:Kinesin-motor	6	0.963082	0.0124621	P33176, O43896, Q5T7B8, O60282, Q9P2P6, P52732	623	43	19113	4.28079	1	0.293551	19.678
GOTERM_MF_FAT	GO:0016620~oxidoreductase activity, acting on the aldehyde or oxo group of donors, NAD or NADP as acceptor	5	0.802568	0.0125309	Q02252, P54886, P11766, P30837, P05091	524	23	12983	5.38624	0.999928	0.154012	17.4798
GOTERM_CC_FAT	GO:0005819~spindle	13	2.08668	0.0126952	Q9Y6D9, Q13185, O60907, P52732, P49454, P35579, P06748, Q3KQU3, P35580, P53350, P67775, Q9P258, Q5TB80	501	147	12782	2.25625	0.997125	0.0760302	16.6161
UP_SEQ_FEATURE	compositionally biased region:Poly-Gly	18	2.88925	0.012724	Q12906, Q9Y295, Q92769, P35716, P35527, Q9UMN6, P23246, Q92841, Q86YV0, Q8IXQ3, P11802, Q8TD19, P48634, Q9Y566, O43707, Q00839, Q9UHB9, Q13127	623	286	19113	1.93084	1	0.295757	20.0495
UP_SEQ_FEATURE	splice variant	271	43.4992	0.0129124	Q9HC10, Q7L1Q6, O60610, Q9Y2L1, Q8IWY7, P23246, P49796, P53621, Q8WXH0, Q9BYB0, O43390, Q00839, Q5HY54, O60506, Q02388, Q8IYY4, Q5T4S7, Q9BZZ5, O60907, O75369, Q9P2E9, Q9BV73, Q2LD37, O95782, Q8TCG1, Q86YR7, O00410, Q9Y4W2, Q96G74, P43686, A6NHR9, P18206, P26358, Q8IWJ2, Q92797, Q9ULI0, P42658, Q8N163, Q9BV20, Q2UY09, Q17RW2, Q86Y56, O75083, Q96T17, O75081, Q8IWI9, Q92900, Q9BZ29, Q6V0I7, Q9P212,…	623	7458	19113	1.11478	1	0.296487	20.3156
UP_SEQ_FEATURE	metal ion-binding site:Magnesium	10	1.60514	0.0135135	Q5TFE4, P60891, P31153, P30520, P06733, P53396, P09104, P14618, P05023, P16615	623	116	19113	2.64474	1	0.30502	21.1594
SMART	SM00129:KISc	6	0.963082	0.0135786	P33176, O43896, Q5T7B8, O60282, Q9P2P6, P52732	311	42	9079	4.17042	0.940989	0.171939	15.8294
GOTERM_BP_FAT	GO:0006633~fatty acid biosynthetic process	9	1.44462	0.0135823	Q15185, P60174, Q9H4A4, Q13085, O00763, P09960, O95573, P49327, P14174	543	79	13528	2.83824	1	0.192728	21.2713
GOTERM_BP_FAT	GO:0033043~regulation of organelle organization	17	2.72873	0.0139868	O14744, Q9Y6G9, P60953, P26358, O76041, P18754, Q96P48, P30086, P23528, P49454, P06748, Q4VCS5, Q9BV73, O75592, O14980, P61158, P46821	543	217	13528	1.95174	1	0.196706	21.8339
UP_SEQ_FEATURE	domain:VWFA 1	4	0.642055	0.0139987	Q02388, P12110, Q2UY09, A6NMZ7	623	16	19113	7.66974	1	0.311124	21.8341
GOTERM_BP_FAT	GO:0043487~regulation of RNA stability	5	0.802568	0.0143086	Q15717, Q08211, Q9NZI8, Q00839, O60506	543	24	13528	5.1903	1	0.199579	22.279
UP_SEQ_FEATURE	domain:Collagen-like 6	3	0.481541	0.0145382	Q2UY09, Q17RW2, Q8NFW1	623	6	19113	15.3395	1	0.318027	22.5782
UP_SEQ_FEATURE	repeat:HAT 8	3	0.481541	0.0145382	Q15020, O94906, Q12996	623	6	19113	15.3395	1	0.318027	22.5782
UP_SEQ_FEATURE	metal ion-binding site:Potassium	3	0.481541	0.0145382	P24752, P31153, P14618	623	6	19113	15.3395	1	0.318027	22.5782
GOTERM_MF_FAT	GO:0031202~RNA splicing factor activity, transesterification mechanism	5	0.802568	0.0145689	O94906, O75533, Q15393, Q6P2Q9, O43172	524	24	12983	5.16182	0.999985	0.174111	20.0368
GOTERM_BP_FAT	GO:0032964~collagen biosynthetic process	3	0.481541	0.0147821	P02452, P50454, P02461	543	5	13528	14.9481	1	0.204285	22.9292
GOTERM_MF_FAT	GO:0016774~phosphotransferase activity, carboxyl group as acceptor	3	0.481541	0.0149362	P00558, P10155, P54886	524	5	12983	14.866	0.999989	0.175378	20.4897
KEGG_PATHWAY	hsa00071:Fatty acid metabolism	7	1.1236	0.0149532	P24752, P30084, P40939, O95573, P11766, P30837, P05091	261	40	5085	3.40948	0.880486	0.124334	16.3047
GOTERM_BP_FAT	GO:0000226~microtubule cytoskeleton organization	13	2.08668	0.0151159	Q96N67, P18754, Q14008, Q5TZA2, P52732, P35579, P06748, Q9BV73, Q14204, P62826, O95613, P46821, O95359	543	147	13528	2.20323	1	0.207195	23.3847
GOTERM_CC_FAT	GO:0015934~large ribosomal subunit	8	1.28411	0.0154269	P36578, P05386, P46777, P62424, P05388, Q02878, P47914, P06748	501	67	12782	3.04633	0.999192	0.0905733	19.8381
GOTERM_BP_FAT	GO:0009309~amine biosynthetic process	9	1.44462	0.015631	P35520, P00367, Q9Y617, Q9BV20, P08243, P31153, P00505, P54886, O43175	543	81	13528	2.76816	1	0.212256	24.0824
INTERPRO	IPR001752:Kinesin, motor region	6	0.963082	0.0157037	P33176, O43896, Q5T7B8, O60282, Q9P2P6, P52732	590	42	16659	4.03366	1	0.265758	22.5171
INTERPRO	IPR019821:Kinesin, motor region, conserved site	6	0.963082	0.0157037	P33176, O43896, Q5T7B8, O60282, Q9P2P6, P52732	590	42	16659	4.03366	1	0.265758	22.5171
SP_PIR_KEYWORDS	deafness	9	1.44462	0.0157704	Q9HC10, O60610, Q7Z406, P60891, P02458, Q06124, O60907, P12107, P35579	623	100	19235	2.77873	0.999537	0.0904339	20.3714
SP_PIR_KEYWORDS	kinetochore	7	1.1236	0.0159513	P53350, Q8WUM0, Q9Y6D9, Q12888, P46060, P49454, Q2NKX8	623	63	19235	3.43053	0.999576	0.0903676	20.5809
SP_PIR_KEYWORDS	calmodulin-binding	10	1.60514	0.0159545	P46940, P35580, Q7Z406, Q5T4S7, Q9Y2K3, O95613, P35749, P35579, P13535, Q9Y623	623	120	19235	2.5729	0.999577	0.0893462	20.5846
GOTERM_BP_FAT	GO:0048193~Golgi vesicle transport	12	1.92616	0.0161349	P53621, P55735, Q9UBF2, Q9Y678, O43896, P48444, P35606, O95782, Q00610, Q10567, P55072, P53618	543	131	13528	2.28215	1	0.21709	24.7592
SP_PIR_KEYWORDS	hydro-lyase	4	0.642055	0.0163159	P35520, P07954, Q99798, P00918	623	17	19235	7.26466	0.999646	0.0902542	21.0015
SP_PIR_KEYWORDS	pyruvate	4	0.642055	0.0163159	P25325, P11498, P11177, P14618	623	17	19235	7.26466	0.999646	0.0902542	21.0015
UP_SEQ_FEATURE	repeat:1-4	4	0.642055	0.0165944	P27824, P48634, P27797, O60506	623	17	19113	7.21858	1	0.351078	25.3529
UP_SEQ_FEATURE	domain:Collagen-like 2	4	0.642055	0.0165944	Q86Y22, Q2UY09, Q17RW2, Q8NFW1	623	17	19113	7.21858	1	0.351078	25.3529
UP_SEQ_FEATURE	domain:VWFA 2	4	0.642055	0.0165944	Q02388, P12110, Q2UY09, A6NMZ7	623	17	19113	7.21858	1	0.351078	25.3529
UP_SEQ_FEATURE	domain:Collagen-like 1	4	0.642055	0.0165944	Q86Y22, Q2UY09, Q17RW2, Q8NFW1	623	17	19113	7.21858	1	0.351078	25.3529
SP_PIR_KEYWORDS	duplication	15	2.4077	0.0167083	P46940, Q01813, P18206, P22626, P19367, P01266, P08133, P02462, P12814, P53621, P07814, P13489, P07237, P08758, Q5HY54	623	228	19235	2.03124	0.999708	0.0913037	21.4518
GOTERM_BP_FAT	GO:0006144~purine base metabolic process	4	0.642055	0.0167349	P22102, P60891, P07741, P49915	543	14	13528	7.11813	1	0.22297	25.5576
GOTERM_BP_FAT	GO:0006268~DNA unwinding during replication	4	0.642055	0.0167349	P33993, P33991, P49736, Q14566	543	14	13528	7.11813	1	0.22297	25.5576
SP_PIR_KEYWORDS	guanine-nucleotide releasing factor	10	1.60514	0.0167608	Q9P212, Q96PE2, Q96N67, Q9Y6D5, Q15751, P18754, Q12802, Q14C86, Q9BZ29, Q86YR7	623	121	19235	2.55164	0.999715	0.0905646	21.512
PIR_SUPERFAMILY	PIRSF001525:lysine-tRNA ligase	3	0.481541	0.0169055	O43776, P14868, Q6PI48	319	5	7396	13.911	0.996145	0.50082	20.6043
PIR_SUPERFAMILY	PIRSF002255:collagen alpha 1(I) chain	3	0.481541	0.0169055	P02458, P02452, P02461	319	5	7396	13.911	0.996145	0.50082	20.6043
GOTERM_CC_FAT	GO:0030118~clathrin coat	6	0.963082	0.0172563	Q13492, Q9UJY4, P48444, O95782, Q00610, Q10567	501	39	12782	3.92507	0.999655	0.0995849	21.9307
KEGG_PATHWAY	hsa00330:Arginine and proline metabolism	8	1.28411	0.0172969	P00367, P12277, P00505, P54886, P28838, P04181, P30837, P05091	261	53	5085	2.94079	0.914582	0.134733	18.6271
SP_PIR_KEYWORDS	alternative splicing	269	43.1782	0.0173811	Q9HC10, Q7L1Q6, O60610, Q9Y2L1, Q8IWY7, P23246, P49796, P53621, Q8WXH0, Q9BYB0, O43390, Q00839, Q5HY54, O60506, Q02388, Q8IYY4, Q5T4S7, Q9BZZ5, O60907, O75369, Q9P2E9, Q9BV73, Q2LD37, O95782, Q8TCG1, Q86YR7, O00410, Q9Y4W2, Q96G74, P43686, A6NHR9, P18206, P26358, Q8IWJ2, Q92797, Q9ULI0, P42658, Q8N163, Q9BV20, Q2UY09, Q17RW2, Q86Y56, O75083, Q96T17, O75081, Q8IWI9, Q92900, Q9BZ29, Q6V0I7, Q9P212,…	623	7488	19235	1.10915	0.99979	0.0927555	22.2185
COG_ONTOLOGY	Nuclear structure / Intracellular trafficking and secretion	3	0.481541	0.0175584	Q9UIA9, O14980, Q9HAV4	111	4	1950	13.1757	0.334643	0.126992	13.0999
INTERPRO	IPR016040:NAD(P)-binding domain	12	1.92616	0.0176154	P56545, P00367, P40926, P22314, P52209, P00338, P40939, Q13564, Q99714, P53396, P49327, O43175	590	150	16659	2.25885	1	0.289063	24.9072
SP_PIR_KEYWORDS	er-golgi transport	8	1.28411	0.0178613	P62820, P53621, P61204, Q9UBF2, Q9Y678, P48444, P35606, P53618	623	83	19235	2.97588	0.999834	0.0941848	22.7615
SMART	SM00327:VWA	8	1.28411	0.0179651	Q02388, P12110, Q2UY09, Q96RW7, O75131, Q9NU22, Q8NFW1, A6NMZ7	311	79	9079	2.95625	0.976543	0.209062	20.4274
UP_SEQ_FEATURE	repeat:LRR 11	9	1.44462	0.0181933	Q13045, Q8WXI7, P13489, Q6F5E8, Q14160, Q8WXH0, Q5CZC0, Q7Z7A1	623	102	19113	2.70697	1	0.37451	27.4454
GOTERM_CC_FAT	GO:0000267~cell fraction	57	9.14928	0.018313	Q01581, P62820, Q9HC10, Q14573, O00291, P30153, P06737, P17858, P53621, Q9H4A4, P62424, Q13564, P05023, O60506, P11498, P49588, P41252, P41250, P54577, Q15149, O43776, P67775, Q9NSD9, P07237, P31150, P46821, Q9Y277, O00170, Q01813, P14868, P12956, P27797, O95573, P30086, P54136, P11766, P16615, O95373, P27348, P22392, P08243, P14625, Q06124, P09104, P55072, P63104, P60174, Q9P212, Q9H553, P46060,…	501	1083	12782	1.34279	0.999789	0.104109	23.1162
GOTERM_CC_FAT	GO:0030426~growth cone	7	1.1236	0.0183355	P35580, P80723, Q7Z406, Q96N67, Q5T1M5, Q7Z2K8, P46821	501	54	12782	3.30724	0.999792	0.102966	23.1412
GOTERM_BP_FAT	GO:0009069~serine family amino acid metabolic process	5	0.802568	0.0189061	P35520, Q9Y617, P23378, P34897, O43175	543	26	13528	4.79105	1	0.246851	28.3806
GOTERM_BP_FAT	GO:0009109~coenzyme catabolic process	5	0.802568	0.0189061	P11177, P40926, P07954, P48735, Q99798	543	26	13528	4.79105	1	0.246851	28.3806
GOTERM_BP_FAT	GO:0009152~purine ribonucleotide biosynthetic process	11	1.76565	0.0189957	P22392, P22102, P60891, P38606, P30520, P04075, P25705, P49915, P31939, P05023, P16615, P15531	543	117	13528	2.34229	1	0.246506	28.4949
GOTERM_CC_FAT	GO:0022627~cytosolic small ribosomal subunit	6	0.963082	0.0191065	P15880, P46783, P23396, P62263, P62701, P46781	501	40	12782	3.82695	0.999855	0.105814	23.9953
SP_PIR_KEYWORDS	thick filament	4	0.642055	0.0191175	Q9Y2K3, P35749, P13535, Q9Y623	623	18	19235	6.86107	0.999911	0.0994543	24.1652
KEGG_PATHWAY	hsa00260:Glycine, serine and threonine metabolism	6	0.963082	0.0191623	P35520, Q9Y617, P23378, P34897, P09622, O43175	261	31	5085	3.77086	0.934657	0.140635	20.4333
UP_SEQ_FEATURE	compositionally biased region:Asp-rich	5	0.802568	0.0193968	O95373, Q14152, Q7Z6Z7, Q86VP6, Q96GA3	623	32	19113	4.79359	1	0.39047	28.984
UP_SEQ_FEATURE	repeat:1-3	4	0.642055	0.0194409	P27824, P48634, P27797, O60506	623	18	19113	6.81755	1	0.387869	29.0398
UP_SEQ_FEATURE	repeat:ARM 9	4	0.642055	0.0194409	O00629, P52294, O60684, P52292	623	18	19113	6.81755	1	0.387869	29.0398
SP_PIR_KEYWORDS	pentose phosphate pathway	3	0.481541	0.0196799	P60174, P52209, P04075	623	7	19235	13.2321	0.999932	0.101177	24.786
SP_PIR_KEYWORDS	stress response	7	1.1236	0.0196833	P34932, P10809, O95433, Q58FG1, P50454, P38646, Q92598	623	66	19235	3.2746	0.999932	0.100139	24.7897
UP_SEQ_FEATURE	compositionally biased region:Poly-Tyr	3	0.481541	0.0199182	Q17RW2, P20930, O60506	623	7	19113	13.1481	1	0.391995	29.6408
UP_SEQ_FEATURE	region of interest:RNA-binding RGG-box	3	0.481541	0.0199182	O43390, Q00839, Q5T6W2	623	7	19113	13.1481	1	0.391995	29.6408
UP_SEQ_FEATURE	repeat:HAT 7	3	0.481541	0.0199182	Q15020, O94906, Q12996	623	7	19113	13.1481	1	0.391995	29.6408
GOTERM_CC_FAT	GO:0030427~site of polarized growth	7	1.1236	0.0199237	P35580, P80723, Q7Z406, Q96N67, Q5T1M5, Q7Z2K8, P46821	501	55	12782	3.24711	0.999901	0.108825	24.891
GOTERM_CC_FAT	GO:0043292~contractile fiber	11	1.76565	0.0202029	P12814, Q15149, P18206, O95425, Q9Y2K3, P06733, P04075, O75369, P35749, P13535, Q9Y623	501	121	12782	2.31936	0.999913	0.108993	25.1947
SMART	SM00150:SPEC	5	0.802568	0.0202804	P12814, Q15149, Q8WXH0, O43707, Q86YR7	311	31	9079	4.70854	0.98561	0.220796	22.76
GOTERM_BP_FAT	GO:0007052~mitotic spindle organization	4	0.642055	0.0203076	Q14204, P18754, P62826, P52732	543	15	13528	6.64359	1	0.259824	30.1489
GOTERM_MF_FAT	GO:0031267~small GTPase binding	10	1.60514	0.020508	O95373, Q9P212, O60610, P49792, Q9UJY4, Q96N67, Q96P70, Q9BZ29, O00410, Q5HY54	524	101	12983	2.45314	1	0.229786	27.0727
GOTERM_MF_FAT	GO:0042162~telomeric DNA binding	4	0.642055	0.0205983	P22626, P12956, Q12888, P19338	524	15	12983	6.60712	1	0.227366	27.175
GOTERM_CC_FAT	GO:0000796~condensin complex	3	0.481541	0.0206301	Q9BPX3, Q15021, O95347	501	6	12782	12.7565	0.999929	0.109909	25.6573
GOTERM_BP_FAT	GO:0006281~DNA repair	20	3.21027	0.0206301	Q16531, Q96T76, P52701, Q92878, P46100, Q12888, P12956, Q9UMS4, Q9H2G2, Q9Y230, P09874, P23246, P78527, Q9BWF3, Q9UPV0, Q9P287, P12004, Q92900, P55072	543	284	13528	1.75447	1	0.261972	30.55
INTERPRO	IPR000886:Endoplasmic reticulum, targeting sequence	6	0.963082	0.020699	Q15084, Q9NYU2, P14625, P07237, P27797, P50454	590	45	16659	3.76475	1	0.326352	28.6174
GOTERM_BP_FAT	GO:0006260~DNA replication	15	2.4077	0.020769	Q92878, P49643, P49454, P25205, P49321, P33993, P33991, P23921, Q9BWF3, Q09028, Q13564, P49736, P12004, Q92900, Q14566	543	190	13528	1.96685	1	0.262087	30.7221
SP_PIR_KEYWORDS	translation regulation	7	1.1236	0.0210488	O43432, Q92616, Q9UQ80, Q9NZI8, P38919, O00425, P61326	623	67	19235	3.22573	0.999966	0.105675	26.2771
GOTERM_CC_FAT	GO:0005793~ER-Golgi intermediate compartment	6	0.963082	0.0210824	Q15084, Q5VYK3, Q9NYU2, P07237, Q14789, P50454	501	41	12782	3.73361	0.999942	0.110929	26.144
UP_SEQ_FEATURE	short sequence motif:DEAD box	5	0.802568	0.0215196	Q92499, O15523, P38919, Q92841, P60842	623	33	19113	4.64833	1	0.412743	31.623
INTERPRO	IPR002035:von Willebrand factor, type A	8	1.28411	0.0215531	Q02388, P12110, Q2UY09, Q96RW7, O75131, Q9NU22, Q8NFW1, A6NMZ7	590	79	16659	2.8593	1	0.333019	29.6143
GOTERM_CC_FAT	GO:0044450~microtubule organizing center part	7	1.1236	0.021603	O15078, Q9BV73, P17987, Q9UPV0, Q14008, O95613, Q5TZA2	501	56	12782	3.18912	0.999955	0.112262	26.7007
GOTERM_MF_FAT	GO:0016790~thiolester hydrolase activity	10	1.60514	0.021722	Q86UV5, Q70CQ2, Q96G74, P45974, Q70CQ4, Q9UPU5, Q02252, P49327, O00154, Q93009	524	102	12983	2.42909	1	0.23493	28.4377
GOTERM_MF_FAT	GO:0070061~fructose binding	3	0.481541	0.021811	Q01813, P04075, P17858	524	6	12983	12.3884	1	0.232509	28.5368
GOTERM_MF_FAT	GO:0003727~single-stranded RNA binding	5	0.802568	0.0218904	Q9H361, P31943, P38919, A6NLN1, O60506	524	27	12983	4.58828	1	0.230068	28.6252
GOTERM_MF_FAT	GO:0003697~single-stranded DNA binding	7	1.1236	0.0226588	P33993, P33991, P42704, P10809, P22626, Q15365, Q14566	524	55	12983	3.1534	1	0.233998	29.4747
INTERPRO	IPR018159:Spectrin/alpha-actinin	5	0.802568	0.0228339	P12814, Q15149, Q8WXH0, O43707, Q86YR7	590	31	16659	4.55413	1	0.344681	31.0847
GOTERM_BP_FAT	GO:0009150~purine ribonucleotide metabolic process	12	1.92616	0.0228517	P22392, P22102, P60891, P38606, P30520, P04075, P53396, P25705, P49915, P31939, P05023, P16615, P15531	543	138	13528	2.16639	1	0.283001	33.2542
GOTERM_BP_FAT	GO:0016032~viral reproduction	8	1.28411	0.0232294	P56545, P62937, O00267, P12956, Q8NI27, O43719, P51610, Q13838	543	71	13528	2.80715	1	0.285489	33.704
BIOCARTA	h_ranbp2Pathway:Sumoylation by RanBP2 Regulates Transcriptional Repression	4	0.642055	0.0233276	Q13547, P49792, P46060, P62826	86	11	1437	6.07611	0.9524	0.456097	24.005
GOTERM_BP_FAT	GO:0034654~nucleobase, nucleoside, nucleotide and nucleic acid biosynthetic process	15	2.4077	0.0234079	P17812, P30520, P04075, P07741, P49915, P31939, P11172, P16615, P15531, P23921, P22392, P22102, P38606, P60891, P25705, P05023	543	193	13528	1.93628	1	0.285872	33.9156
GOTERM_BP_FAT	GO:0034404~nucleobase, nucleoside and nucleotide biosynthetic process	15	2.4077	0.0234079	P17812, P30520, P04075, P07741, P49915, P31939, P11172, P16615, P15531, P23921, P22392, P22102, P38606, P60891, P25705, P05023	543	193	13528	1.93628	1	0.285872	33.9156
GOTERM_CC_FAT	GO:0000775~chromosome, centromeric region	11	1.76565	0.0235209	P55735, Q8WUM0, Q9Y6D9, Q12888, P67775, O14980, Q13185, P46060, Q9P258, P49454, Q2NKX8	501	124	12782	2.26325	0.999982	0.120367	28.7181
GOTERM_BP_FAT	GO:0030198~extracellular matrix organization	10	1.60514	0.0235865	P25940, P12110, P02458, P08572, P02452, Q14993, P12107, P50454, P02461, P35749	543	104	13528	2.39552	1	0.286251	34.1266
GOTERM_CC_FAT	GO:0009898~internal side of plasma membrane	21	3.37079	0.0242121	O95996, P18206, P60953, Q9Y490, Q92797, O95425, P46060, P35606, O14617, P30086, P53621, Q9Y678, Q9UBF2, Q8WXH0, O14654, P48444, O95782, Q00610, Q10567, P63241, P53618	501	316	12782	1.69548	0.999987	0.12237	29.4323
GOTERM_BP_FAT	GO:0006081~cellular aldehyde metabolic process	5	0.802568	0.0243222	P60174, Q9Y4C1, Q04760, P48735, P11766	543	28	13528	4.44883	1	0.292321	34.9892
GOTERM_BP_FAT	GO:0000723~telomere maintenance	5	0.802568	0.0243222	Q15185, Q92878, P12956, P09874, P78527	543	28	13528	4.44883	1	0.292321	34.9892
GOTERM_BP_FAT	GO:0016570~histone modification	11	1.76565	0.0246405	Q13547, O14744, Q9BWF3, Q9Y4C1, Q09472, Q92794, Q92769, Q9Y230, Q7Z6Z7, Q9Y265, O14929	543	122	13528	2.24629	1	0.294068	35.3591
COG_ONTOLOGY	Lipid metabolism	9	1.44462	0.0248984	P05165, Q9HCC0, Q13085, P30419, Q9Y232, O00763, P30084, Q7Z494, Q96RQ3	111	64	1950	2.47044	0.440053	0.134959	18.1148
GOTERM_BP_FAT	GO:0006090~pyruvate metabolic process	6	0.963082	0.0254111	P11498, P60174, P11177, P00338, P09104, P09622	543	42	13528	3.55906	1	0.300309	36.2465
SP_PIR_KEYWORDS	ubl conjugation pathway	26	4.17335	0.0254615	Q9UJX3, Q16531, Q96G74, Q7Z7L7, Q9C0C9, O75155, Q5T4S7, P22314, Q9UPU5, Q15751, O60907, Q7Z6Z7, Q93009, Q86VP6, Q70CQ2, Q86UV5, O95376, P49792, P45974, Q70CQ4, O75592, Q13564, Q13618, P55072, Q9UBT2	623	509	19235	1.5771	0.999996	0.125364	30.8988
SP_PIR_KEYWORDS	carbon-oxygen lyase	4	0.642055	0.025467	P35520, P07954, Q99798, P00918	623	20	19235	6.17496	0.999996	0.124143	30.9044
UP_SEQ_FEATURE	propeptide:C-terminal propeptide	3	0.481541	0.025991	P02452, P12107, P02461	623	8	19113	11.5046	1	0.471429	36.8822
UP_SEQ_FEATURE	repeat:RCC1 7	3	0.481541	0.025991	Q15751, P18754, Q9P258	623	8	19113	11.5046	1	0.471429	36.8822
KEGG_PATHWAY	hsa04510:Focal adhesion	18	2.88925	0.0271516	P25940, P12110, P18206, P60953, O60610, Q9Y490, P08572, P02452, A6NMZ7, P02461, O75369, P62136, P02462, P12814, P02458, P12107, O43707, Q5HY54	261	201	5085	1.74472	0.979376	0.184766	27.7615
GOTERM_BP_FAT	GO:0032200~telomere organization	5	0.802568	0.0273466	Q15185, Q92878, P12956, P09874, P78527	543	29	13528	4.29542	1	0.317783	38.4248
KEGG_PATHWAY	hsa00270:Cysteine and methionine metabolism	6	0.963082	0.0277272	P25325, P35520, P26358, P31153, P00338, P00505	261	34	5085	3.43813	0.981027	0.179825	28.2648
GOTERM_MF_FAT	GO:0019843~rRNA binding	5	0.802568	0.0278216	P46777, P06748, P62701, P32969, P46781	524	29	12983	4.27185	1	0.276172	34.9424
INTERPRO	IPR016162:Aldehyde dehydrogenase, N-terminal	4	0.642055	0.0279464	Q02252, P54886, P30837, P05091	590	19	16659	5.94434	1	0.399885	36.6718
INTERPRO	IPR004088:K Homology, type 1	5	0.802568	0.0281062	Q9NZI8, O00425, Q15366, Q15365, Q5T6W2	590	33	16659	4.27812	1	0.396985	36.8393
SP_PIR_KEYWORDS	transferase	59	9.4703	0.0285625	Q01581, P24752, Q06210, O14744, Q9H0A0, Q3LXA3, P31153, P07741, Q8IWY7, P49643, P11172, P06737, P29401, P17858, Q96PY6, O14802, P53350, P35573, P53396, Q9NR48, P25325, Q08J23, Q9H2G2, P04181, P42356, Q8N1G2, P09211, P00558, Q9Y232, Q8TD19, Q01813, P26358, Q92794, P00505, O14929, P09874, P78527, P22392, P22102, P11216, Q460N5, O14578, Q8NEV1, Q9Y617, Q09472, P12277, P30419, Q9H553, P34897, P49327,…	623	1394	19235	1.30675	0.999999	0.136993	33.9838
GOTERM_BP_FAT	GO:0042744~hydrogen peroxide catabolic process	4	0.642055	0.0286084	P30041, P30048, P32119, Q06830	543	17	13528	5.86199	1	0.328299	39.807
GOTERM_BP_FAT	GO:0006000~fructose metabolic process	4	0.642055	0.0286084	Q06210, Q01813, P04075, P17858	543	17	13528	5.86199	1	0.328299	39.807
GOTERM_MF_FAT	GO:0000146~microfilament motor activity	4	0.642055	0.029009	P35580, Q7Z406, P35579, Q9Y623	524	17	12983	5.82982	1	0.282633	36.1425
SP_PIR_KEYWORDS	Aminotransferase	4	0.642055	0.0290148	Q06210, Q9Y617, P00505, P04181	623	21	19235	5.88091	0.999999	0.13769	34.4229
SP_PIR_KEYWORDS	tricarboxylic acid cycle	4	0.642055	0.0290148	P40926, P07954, P48735, Q99798	623	21	19235	5.88091	0.999999	0.13769	34.4229
COG_ONTOLOGY	Posttranslational modification, protein turnover, chaperones	12	1.92616	0.0290335	P30041, P26641, P43686, O95373, Q13200, P45974, Q15008, O95433, Q99460, O00231, P62191, Q93009	111	104	1950	2.02703	0.492195	0.126748	20.8272
GOTERM_BP_FAT	GO:0006002~fructose 6-phosphate metabolic process	3	0.481541	0.029431	Q06210, Q01813, P17858	543	7	13528	10.6772	1	0.334454	40.6922
GOTERM_BP_FAT	GO:0040023~establishment of nucleus localization	3	0.481541	0.029431	P35580, P60953, Q9Y266	543	7	13528	10.6772	1	0.334454	40.6922
GOTERM_BP_FAT	GO:0042921~glucocorticoid receptor signaling pathway	3	0.481541	0.029431	Q9BWF3, P27797, Q04917	543	7	13528	10.6772	1	0.334454	40.6922
UP_SEQ_FEATURE	repeat:Spectrin 4	4	0.642055	0.0294925	P12814, Q15149, Q8WXH0, O43707	623	21	19113	5.84361	1	0.511893	40.7318
GOTERM_MF_FAT	GO:0017025~TATA-binding protein binding	3	0.481541	0.0297295	O75155, P52597, Q86VP6	524	7	12983	10.6186	1	0.285044	36.8606
GOTERM_BP_FAT	GO:0016569~covalent chromatin modification	11	1.76565	0.0299559	Q13547, O14744, Q9BWF3, Q9Y4C1, Q09472, Q92794, Q92769, Q9Y230, Q7Z6Z7, Q9Y265, O14929	543	126	13528	2.17498	1	0.337741	41.2508
GOTERM_BP_FAT	GO:0015980~energy derivation by oxidation of organic compounds	12	1.92616	0.0300706	Q06210, P11177, P31930, P40926, P35573, P07954, P11216, P48735, Q99798, P06737, P09622, P62136	543	144	13528	2.07612	1	0.337208	41.372
GOTERM_MF_FAT	GO:0017016~Ras GTPase binding	9	1.44462	0.0301197	O95373, Q9P212, O60610, P49792, Q96N67, Q96P70, Q9BZ29, O00410, Q5HY54	524	91	12983	2.45044	1	0.284718	37.2464
GOTERM_BP_FAT	GO:0043086~negative regulation of catalytic activity	19	3.04976	0.0301518	Q9UJX3, P43686, Q13200, P31947, P30153, Q99460, P61981, Q86VP6, P28074, P49796, P67775, P30048, Q15008, P51665, P49721, O00231, P62191, O00232, Q5HY54	543	277	13528	1.70886	1	0.336375	41.4578
GOTERM_BP_FAT	GO:0051130~positive regulation of cellular component organization	14	2.24719	0.0303169	P26358, P60953, O00291, P27797, Q96P48, P30086, P23528, Q4VCS5, P06748, Q86VP6, O43707, P61158, P46821, P63241	543	181	13528	1.92701	1	0.336316	41.6319
GOTERM_BP_FAT	GO:0034614~cellular response to reactive oxygen species	5	0.802568	0.0305855	P30041, P30044, P30048, P32119, Q06830	543	30	13528	4.15224	1	0.337195	41.914
GOTERM_CC_FAT	GO:0000776~kinetochore	8	1.28411	0.0306782	P55735, Q8WUM0, Q9Y6D9, Q12888, O14980, P46060, P49454, Q2NKX8	501	77	12782	2.6507	0.999999	0.151284	35.7995
SP_PIR_KEYWORDS	dna recombination	5	0.802568	0.0307684	P12956, Q9Y230, P23246, Q9Y265, P78527	623	37	19235	4.17227	1	0.144111	36.0998
INTERPRO	IPR003960:ATPase, AAA-type, conserved site	5	0.802568	0.0309914	P43686, Q96QE3, Q9ULI0, P55072, P62191	590	34	16659	4.15229	1	0.423181	39.7946
GOTERM_CC_FAT	GO:0000139~Golgi membrane	14	2.24719	0.0310188	Q9P212, Q9Y6D5, P35606, P53621, Q9Y678, Q9UBF2, P48444, O95782, O75081, Q10567, Q14789, Q00610, P61158, P53618	501	186	12782	1.92033	0.999999	0.151254	36.1196
GOTERM_CC_FAT	GO:0005871~kinesin complex	4	0.642055	0.0313466	P33176, O60282, P52732, Q7Z494	501	18	12782	5.66955	1	0.151168	36.4263
GOTERM_MF_FAT	GO:0050662~coenzyme binding	14	2.24719	0.0314409	P56545, P00367, P52209, P40939, P13804, Q99714, Q02252, P48735, O43175, P09622, P09874, P11766, O00154, Q7Z494	524	181	12983	1.91643	1	0.29179	38.5363
GOTERM_CC_FAT	GO:0009295~nucleoid	5	0.802568	0.0315493	P42704, P49411, P40939, P34897, P38646	501	31	12782	4.115	1	0.150526	36.6152
GOTERM_CC_FAT	GO:0042645~mitochondrial nucleoid	5	0.802568	0.0315493	P42704, P49411, P40939, P34897, P38646	501	31	12782	4.115	1	0.150526	36.6152
KEGG_PATHWAY	hsa00903:Limonene and pinene degradation	4	0.642055	0.031627	P30084, P40939, P30837, P05091	261	14	5085	5.5665	0.989235	0.19409	31.5912
GOTERM_MF_FAT	GO:0051020~GTPase binding	10	1.60514	0.031697	O95373, Q9P212, O60610, P49792, Q9UJY4, Q96N67, Q96P70, Q9BZ29, O00410, Q5HY54	524	109	12983	2.27309	1	0.290341	38.7834
UP_SEQ_FEATURE	repeat:HAT 6	3	0.481541	0.0327063	Q15020, O94906, Q12996	623	9	19113	10.2263	1	0.545462	44.0692
COG_ONTOLOGY	Cell division and chromosome partitioning	12	1.92616	0.0328922	O95996, A6NHR9, Q15149, Q7Z7A1, Q96P70, Q9P219, Q14789, O60282, Q5T1M5, P35658, O14578, Q86YV0	111	106	1950	1.98878	0.536636	0.120329	23.2871
GOTERM_BP_FAT	GO:0032392~DNA geometric change	4	0.642055	0.033334	P33993, P33991, P49736, Q14566	543	18	13528	5.53632	1	0.360018	44.7278
GOTERM_BP_FAT	GO:0070301~cellular response to hydrogen peroxide	4	0.642055	0.033334	P30041, P30048, P32119, Q06830	543	18	13528	5.53632	1	0.360018	44.7278
GOTERM_BP_FAT	GO:0032508~DNA duplex unwinding	4	0.642055	0.033334	P33993, P33991, P49736, Q14566	543	18	13528	5.53632	1	0.360018	44.7278
UP_SEQ_FEATURE	repeat:ARM 8	4	0.642055	0.033345	O00629, P52294, O60684, P52292	623	22	19113	5.578	1	0.548839	44.7111
UP_SEQ_FEATURE	metal ion-binding site:Magnesium; via carbonyl oxygen	4	0.642055	0.033345	Q5TFE4, Q01813, P30520, P17858	623	22	19113	5.578	1	0.548839	44.7111
UP_SEQ_FEATURE	repeat:Spectrin 3	4	0.642055	0.033345	P12814, Q15149, Q8WXH0, O43707	623	22	19113	5.578	1	0.548839	44.7111
GOTERM_BP_FAT	GO:0051187~cofactor catabolic process	5	0.802568	0.0340408	P11177, P40926, P07954, P48735, Q99798	543	31	13528	4.0183	1	0.364516	45.4303
INTERPRO	IPR018111:K Homology, type 1, subgroup	5	0.802568	0.0340446	Q9NZI8, O00425, Q15366, Q15365, Q5T6W2	590	35	16659	4.03366	1	0.449253	42.7802
KEGG_PATHWAY	hsa00061:Fatty acid biosynthesis	3	0.481541	0.0340765	Q13085, O00763, P49327	261	6	5085	9.74138	0.992468	0.199251	33.6078
KEGG_PATHWAY	hsa00680:Methane metabolism	3	0.481541	0.0340765	P30041, P34897, P11766	261	6	5085	9.74138	0.992468	0.199251	33.6078
GOTERM_CC_FAT	GO:0005657~replication fork	5	0.802568	0.034979	Q92769, Q12888, P49643, P12004, P25205	501	32	12782	3.9864	1	0.164062	39.7341
GOTERM_MF_FAT	GO:0003777~microtubule motor activity	8	1.28411	0.0351672	P33176, O43896, Q14204, Q5T7B8, O60282, Q9P2P6, P52732, Q7Z494	524	77	12983	2.5742	1	0.313332	42.0421
GOTERM_MF_FAT	GO:0030674~protein binding, bridging	9	1.44462	0.0355932	Q96T76, P12110, Q9BWF3, Q92878, Q02790, O14654, Q14993, P12107, Q2MD59	524	94	12983	2.37224	1	0.312937	42.4307
SMART	SM00386:HAT	3	0.481541	0.0356971	Q15020, O94906, Q12996	311	9	9079	9.73098	0.99946	0.341653	36.7562
SMART	SM00809:Alpha_adaptinC2	3	0.481541	0.0356971	Q9UJY4, O95782, Q10567	311	9	9079	9.73098	0.99946	0.341653	36.7562
GOTERM_BP_FAT	GO:0009119~ribonucleoside metabolic process	6	0.963082	0.0359895	P17812, P22392, P31153, P53396, P07741, P11172, P15531	543	46	13528	3.24958	1	0.379424	47.3238
GOTERM_CC_FAT	GO:0032982~myosin filament	4	0.642055	0.0361715	Q9Y2K3, P35749, P13535, Q9Y623	501	19	12782	5.37115	1	0.167572	40.7847
SMART	SM00322:KH	5	0.802568	0.0363353	Q9NZI8, O00425, P23396, Q15366, Q5T6W2	311	37	9079	3.94499	0.999529	0.331844	37.2817
GOTERM_BP_FAT	GO:0010035~response to inorganic substance	15	2.4077	0.0365068	Q14573, P36551, Q09472, Q9H553, P02452, P30086, P30041, P30044, Q9BXP5, P22102, P30048, P32119, P46821, Q06830, P00918	543	205	13528	1.82293	1	0.382076	47.816
GOTERM_BP_FAT	GO:0009165~nucleotide biosynthetic process	14	2.24719	0.0366151	P17812, P30520, P04075, P49915, P31939, P11172, P16615, P15531, P23921, P22392, P22102, P38606, P60891, P25705, P05023	543	186	13528	1.87521	1	0.381317	47.9185
UP_SEQ_FEATURE	repeat:TPR 3	10	1.60514	0.0366323	O76094, P49321, Q9UJX3, Q99615, Q02790, P31948, Q9H3U1, P78527, Q08752, Q7Z494	623	138	19113	2.22311	1	0.579804	47.9061
SP_PIR_KEYWORDS	hydrolase	64	10.2729	0.0370708	P32019, Q9NX46, Q12873, Q92769, Q9Y2L1, O15523, Q9Y230, O15355, P62136, Q9H4A4, Q08211, P38606, P35573, O00148, Q9Y265, P05023, Q5T6H7, Q5TFE4, Q92878, P18669, Q2NKX8, Q93009, P60842, Q70CQ2, P28074, Q9UNY4, Q70CQ4, P67775, O00154, Q96G74, P12956, P16615, Q92841, Q13547, P30041, P33176, P45974, P48147, Q06124, P09960, O00429, P38919, Q92900, P55072, Q4J6C6, Q9NR30, Q9P212, Q9BYT8, O75643, P46100,…	623	1555	19235	1.27073	1	0.169875	41.803
INTERPRO	IPR018359:Bromodomain, conserved site	5	0.802568	0.0372665	Q09472, Q9NSI6, Q9ULI0, Q9NR48, Q13263	590	36	16659	3.92161	1	0.475094	45.7799
UP_SEQ_FEATURE	repeat:LRR 10	9	1.44462	0.0373335	Q13045, Q8WXI7, P13489, Q6F5E8, Q14160, Q8WXH0, Q5CZC0, Q7Z7A1	623	117	19113	2.35992	1	0.583184	48.5647
GOTERM_BP_FAT	GO:0051297~centrosome organization	5	0.802568	0.0377139	Q9BV73, Q14008, Q5TZA2, P52732, P06748	543	32	13528	3.89273	1	0.38867	48.9477
GOTERM_BP_FAT	GO:0031401~positive regulation of protein modification process	14	2.24719	0.0379789	Q9UJX3, P43686, Q13200, P26358, Q96N67, Q99460, P28074, P53350, Q15008, P51665, P49721, O00231, P62191, O00232	543	187	13528	1.86518	1	0.389161	49.193
INTERPRO	IPR008152:Clathrin adaptor, alpha/beta/gamma-adaptin, appendage, Ig-like subdomain	3	0.481541	0.0380982	Q9UJY4, O95782, Q10567	590	9	16659	9.41186	1	0.477843	46.53
INTERPRO	IPR003107:RNA-processing protein, HAT helix	3	0.481541	0.0380982	Q15020, O94906, Q12996	590	9	16659	9.41186	1	0.477843	46.53
INTERPRO	IPR000836:Phosphoribosyltransferase	3	0.481541	0.0380982	P60891, P07741, P11172	590	9	16659	9.41186	1	0.477843	46.53
INTERPRO	IPR001375:Peptidase S9, prolyl oligopeptidase active site region	3	0.481541	0.0380982	P48147, P42658, Q4J6C6	590	9	16659	9.41186	1	0.477843	46.53
GOTERM_BP_FAT	GO:0031958~corticosteroid receptor signaling pathway	3	0.481541	0.0382146	Q9BWF3, P27797, Q04917	543	8	13528	9.34254	1	0.389411	49.4103
GOTERM_BP_FAT	GO:0007016~cytoskeletal anchoring at plasma membrane	3	0.481541	0.0382146	Q9Y490, Q9Y566, O75369	543	8	13528	9.34254	1	0.389411	49.4103
GOTERM_BP_FAT	GO:0046605~regulation of centrosome cycle	3	0.481541	0.0382146	Q9Y6G9, O14980, P06748	543	8	13528	9.34254	1	0.389411	49.4103
SP_PIR_KEYWORDS	chromosomal rearrangement	16	2.56822	0.0384655	Q09472, Q92794, P02452, O00291, Q99714, P49915, Q7Z7A1, Q7Z6Z7, P23246, P06748, Q13492, Q9BYB0, P62424, O75081, P35658, P35749	623	279	19235	1.7706	1	0.174173	42.9993
GOTERM_MF_FAT	GO:0004372~glycine hydroxymethyltransferase activity	3	0.481541	0.0385968	P22102, P34897, P31939	524	8	12983	9.29127	1	0.331102	45.1027
GOTERM_MF_FAT	GO:0008143~poly(A) RNA binding	3	0.481541	0.0385968	Q9H361, P38919, O60506	524	8	12983	9.29127	1	0.331102	45.1027
GOTERM_MF_FAT	GO:0030898~actin-dependent ATPase activity	3	0.481541	0.0385968	P35580, Q7Z406, P35579	524	8	12983	9.29127	1	0.331102	45.1027
GOTERM_BP_FAT	GO:0010564~regulation of cell cycle process	10	1.60514	0.0393957	O14744, Q9Y6G9, P60953, O75592, O14980, P18754, P27797, P30086, P49454, P06748	543	114	13528	2.18539	1	0.397172	50.4858
SP_PIR_KEYWORDS	lipid synthesis	8	1.28411	0.0396132	Q15185, P11498, Q01581, P60174, Q13085, O00763, P53396, P49327	623	98	19235	2.52039	1	0.17735	43.9665
GOTERM_MF_FAT	GO:0003682~chromatin binding	12	1.92616	0.0400495	Q12873, P52701, Q8TAQ2, P46100, Q9Y232, Q13185, P18754, O75533, P62826, P49454, Q92900, Q13127	524	150	12983	1.98214	1	0.337679	46.3531
INTERPRO	IPR004087:K Homology	5	0.802568	0.0406575	Q9NZI8, O00425, P23396, Q15366, Q5T6W2	590	37	16659	3.81562	1	0.495696	48.7774
GOTERM_MF_FAT	GO:0042802~identical protein binding	36	5.77849	0.0407901	P35520, P00367, P36551, Q8IWJ2, P04075, Q99714, Q9Y230, P09874, P06737, P11766, P51610, Q99832, P05091, P17858, Q15717, Q13547, P22392, Q9BV20, P08243, P02458, O75592, P30048, P09104, O43707, Q14566, Q5HY54, Q9Y3F4, P26639, Q29RF7, P02452, Q8N3K9, P49454, P35579, P06748, P15531, Q13838, P60891	524	640	12983	1.39369	1	0.339172	46.9803
GOTERM_CC_FAT	GO:0016459~myosin complex	7	1.1236	0.0411125	P35580, Q7Z406, Q9Y2K3, P35749, P35579, P13535, Q9Y623	501	65	12782	2.74755	1	0.186775	44.9589
GOTERM_MF_FAT	GO:0008134~transcription factor binding	30	4.81541	0.0415296	O00170, Q9UGU0, P62820, P26358, Q9Y295, Q92769, Q92794, P06733, P31946, P09874, P51610, P78527, Q13547, P56545, Q7KZF4, Q9BWF3, P62826, P23396, Q9UBT2, Q13263, P63104, Q5HY54, Q96T76, Q09472, O94906, Q8TAQ2, O60907, P49454, P06748, O43593	524	513	12983	1.44893	1	0.340619	47.5996
GOTERM_BP_FAT	GO:0051650~establishment of vesicle localization	5	0.802568	0.0416054	P53621, Q9Y678, P48444, P35606, P53618	543	33	13528	3.77476	1	0.412706	52.4404
UP_SEQ_FEATURE	repeat:ARM 7	4	0.642055	0.0417905	O00629, P52294, O60684, P52292	623	24	19113	5.11316	1	0.62172	52.5709
GOTERM_CC_FAT	GO:0044431~Golgi apparatus part	19	3.04976	0.0418745	Q5VYK3, Q9P212, Q9UJY4, Q9Y6D5, P35606, P53621, Q9Y678, Q9UBF2, P42356, O00429, P48444, O95782, Q00610, Q14789, O75081, Q10567, P61158, Q5HY54, P53618	501	294	12782	1.6488	1	0.188135	45.5777
GOTERM_BP_FAT	GO:0051235~maintenance of location	7	1.1236	0.0425251	Q9Y490, P14625, Q9Y566, P27797, P31946, O75369, Q5HY54	543	64	13528	2.72491	1	0.418025	53.2322
GOTERM_BP_FAT	GO:0009116~nucleoside metabolic process	7	1.1236	0.0425251	P17812, P22392, P60891, P31153, P53396, P07741, P11172, P15531	543	64	13528	2.72491	1	0.418025	53.2322
BIOCARTA	h_g2Pathway:Cell Cycle: G2/M Checkpoint	5	0.802568	0.0425955	P27348, P53350, Q09472, Q04917, P78527	86	23	1437	3.63246	0.996358	0.607759	39.7232
UP_SEQ_FEATURE	short sequence motif:Prevents secretion from ER	6	0.963082	0.0426177	Q15084, Q9NYU2, P14625, P07237, P27797, P50454	623	59	19113	3.1199	1	0.625464	53.2813
GOTERM_CC_FAT	GO:0000779~condensed chromosome, centromeric region	7	1.1236	0.0437957	Q8WUM0, Q9Y6D9, Q12888, Q13185, P46060, P49454, Q2NKX8	501	66	12782	2.70592	1	0.194188	47.1094
GOTERM_BP_FAT	GO:0030010~establishment of cell polarity	4	0.642055	0.0439153	Q14160, Q96N67, P23528, P35579	543	20	13528	4.98269	1	0.426751	54.4057
GOTERM_MF_FAT	GO:0005048~signal sequence binding	4	0.642055	0.0445099	P52294, Q14974, Q92973, P52292	524	20	12983	4.95534	1	0.3568	50.0279
UP_SEQ_FEATURE	compositionally biased region:Glu-rich	16	2.56822	0.044727	Q13045, Q8TAQ2, Q92794, Q8IWJ2, Q14160, Q15751, Q14152, Q9H2G2, Q8N3K9, Q7Z6Z7, Q2NL82, O00267, Q9BXP5, Q9UPV0, Q0VD83, O95613	623	283	19113	1.7345	1	0.640047	55.0475
SP_PIR_KEYWORDS	neurodegeneration	7	1.1236	0.0448559	P10809, P22314, O00291, Q8IWY7, P42658, P41250, Q8N0X7	623	80	19235	2.70154	1	0.197055	48.194
GOTERM_BP_FAT	GO:0006323~DNA packaging	10	1.60514	0.0452766	Q9BPX3, Q15021, Q99733, Q92794, O95347, Q96KK5, P49736, O14929, Q9NR48, P06748	543	117	13528	2.12935	1	0.435061	55.5278
UP_SEQ_FEATURE	repeat:LRR 14	6	0.963082	0.0453001	Q13045, Q8WXI7, P13489, Q6F5E8, Q14160, Q7Z7A1	623	60	19113	3.0679	1	0.641286	55.5165
GOTERM_BP_FAT	GO:0007163~establishment or maintenance of cell polarity	6	0.963082	0.0454668	P60953, Q01518, Q14160, Q96N67, P23528, P35579	543	49	13528	3.05063	1	0.434734	55.6825
GOTERM_BP_FAT	GO:0032886~regulation of microtubule-based process	6	0.963082	0.0454668	Q9Y6G9, Q9BV73, O14980, P46821, O95359, P06748	543	49	13528	3.05063	1	0.434734	55.6825
SP_PIR_KEYWORDS	myogenesis	4	0.642055	0.0456526	Q14993, P49454, Q9H3U1, O75369	623	25	19235	4.93997	1	0.198499	48.8098
GOTERM_BP_FAT	GO:0043648~dicarboxylic acid metabolic process	5	0.802568	0.0457154	P11498, P40926, P07954, P00505, P09622	543	34	13528	3.66374	1	0.434832	55.8839
GOTERM_CC_FAT	GO:0035253~ciliary rootlet	3	0.481541	0.0458136	P33176, O60282, Q5TZA2	501	9	12782	8.50432	1	0.200472	48.6749
UP_SEQ_FEATURE	site:Transition state stabilizer	4	0.642055	0.046377	P14618, P31939, P30837, P05091	623	25	19113	4.90864	1	0.646612	56.3852
SMART	SM00297:BROMO	5	0.802568	0.0464749	Q09472, Q9NSI6, Q9ULI0, Q9NR48, Q13263	311	40	9079	3.64912	0.999947	0.388935	45.1103
GOTERM_CC_FAT	GO:0005913~cell-cell adherens junction	5	0.802568	0.0465148	P18206, Q9UI47, Q14160, Q8TDM6, P35579	501	35	12782	3.64471	1	0.201403	49.2087
INTERPRO	IPR000594:UBA/THIF-type NAD/FAD binding fold	3	0.481541	0.0465274	P22314, Q13564, Q9UBT2	590	10	16659	8.47068	1	0.539244	53.6019
GOTERM_BP_FAT	GO:0051493~regulation of cytoskeleton organization	11	1.76565	0.0466839	Q9Y6G9, Q9BV73, O76041, O75592, O14980, Q96P48, P61158, P23528, P46821, P06748, Q4VCS5	543	136	13528	2.01506	1	0.44008	56.6604
GOTERM_MF_FAT	GO:0016407~acetyltransferase activity	8	1.28411	0.0469727	P24752, Q9H0A0, Q09472, Q92794, Q9Y232, P40939, P49327, O14929	524	82	12983	2.41724	1	0.368975	51.9547
GOTERM_BP_FAT	GO:0051259~protein oligomerization	13	2.08668	0.0473195	Q14573, Q01813, Q99714, P30086, P14174, P31946, P06748, P17858, P23921, Q9P219, O43593, P08758, P55072	543	174	13528	1.86135	1	0.442889	57.163
SP_PIR_KEYWORDS	Ehlers-Danlos syndrome	3	0.481541	0.0473267	Q96JG9, P02452, P02461	623	11	19235	8.4204	1	0.203361	50.0817
UP_SEQ_FEATURE	repeat:HAT 5	3	0.481541	0.0478737	Q15020, O94906, Q12996	623	11	19113	8.36699	1	0.655085	57.566
UP_SEQ_FEATURE	domain:MPN	3	0.481541	0.0478737	P51665, Q6P2Q9, O00303	623	11	19113	8.36699	1	0.655085	57.566
GOTERM_MF_FAT	GO:0016668~oxidoreductase activity, acting on sulfur group of donors, NAD or NADP as acceptor	3	0.481541	0.0483239	P30048, Q86VQ3, P09622	524	9	12983	8.25891	1	0.373786	52.9822
GOTERM_MF_FAT	GO:0008641~small protein activating enzyme activity	3	0.481541	0.0483239	P22314, Q13564, Q9UBT2	524	9	12983	8.25891	1	0.373786	52.9822
GOTERM_MF_FAT	GO:0070717~poly-purine tract binding	3	0.481541	0.0483239	Q9H361, P38919, O60506	524	9	12983	8.25891	1	0.373786	52.9822
COG_ONTOLOGY	Cell division and chromosome partitioning / Cytoskeleton	5	0.802568	0.0484504	O75592, Q8TD19, Q15751, P18754, Q9P258	111	25	1950	3.51351	0.680903	0.150562	32.541
GOTERM_CC_FAT	GO:0016607~nuclear speck	9	1.44462	0.0485899	Q15020, O75533, Q9UQ35, Q6P2Q9, P38919, P61326, P06748, O43172, Q13838	501	103	12782	2.22929	1	0.207677	50.7585
GOTERM_BP_FAT	GO:0009124~nucleoside monophosphate biosynthetic process	6	0.963082	0.0489261	P22102, P60891, P30520, P49915, P31939, P11172	543	50	13528	2.98961	1	0.452407	58.409
SP_PIR_KEYWORDS	Fatty acid biosynthesis	5	0.802568	0.0495	Q15185, P60174, Q13085, O00763, P49327	623	43	19235	3.59009	1	0.210041	51.689
SP_PIR_KEYWORDS	calcium binding	8	1.28411	0.0495824	P12814, P27824, P14625, P20930, P27797, P08758, P13797, P08133	623	103	19235	2.39804	1	0.208581	51.749
GOTERM_MF_FAT	GO:0003684~damaged DNA binding	6	0.963082	0.0498625	Q16531, P52701, Q12888, Q9Y230, P23396	524	50	12983	2.97321	1	0.379597	54.1271
GOTERM_BP_FAT	GO:0031023~microtubule organizing center organization	5	0.802568	0.0500434	Q9BV73, Q14008, Q5TZA2, P52732, P06748	543	35	13528	3.55906	1	0.458361	59.2552
SP_PIR_KEYWORDS	cytosol	4	0.642055	0.0504083	P46783, Q14204, P52292, P26373	623	26	19235	4.74997	1	0.209968	52.3464
GOTERM_MF_FAT	GO:0008483~transaminase activity	4	0.642055	0.0504242	Q06210, Q9Y617, P00505, P04181	524	21	12983	4.71937	1	0.379368	54.5386
GOTERM_CC_FAT	GO:0031968~organelle outer membrane	9	1.44462	0.0509269	Q8IVL0, Q14573, P42704, O00429, O95573, Q86UT6, P30086, P19367, Q9Y277	501	104	12782	2.20785	1	0.214796	52.4511
UP_SEQ_FEATURE	repeat:Spectrin 2	4	0.642055	0.0512007	P12814, Q15149, Q8WXH0, O43707	623	26	19113	4.71984	1	0.676886	60.0836
UP_SEQ_FEATURE	repeat:Spectrin 1	4	0.642055	0.0512007	P12814, Q15149, Q8WXH0, O43707	623	26	19113	4.71984	1	0.676886	60.0836
INTERPRO	IPR008942:ENTH/VHS	4	0.642055	0.051299	Q9NQG5, Q13492, Q9UJY4, O00291	590	24	16659	4.70593	1	0.570335	57.2059
INTERPRO	IPR001487:Bromodomain	5	0.802568	0.0518456	Q09472, Q9NSI6, Q9ULI0, Q9NR48, Q13263	590	40	16659	3.52945	1	0.569347	57.6016
SP_PIR_KEYWORDS	magnesium	22	3.5313	0.0519786	Q5TFE4, Q9NX46, Q01813, Q3LXA3, P31153, P06733, P30520, O95573, P48735, P16615, O15355, P15531, P17858, Q96PY6, O14802, P22392, P60891, Q8TD19, P53396, P09104, P14618, P28838, P05023	623	442	19235	1.53675	1	0.214119	53.4633
GOTERM_BP_FAT	GO:0043392~negative regulation of DNA binding	6	0.963082	0.0525364	Q96JM2, Q92769, O43593, P23396, P32119, Q5HY54	543	51	13528	2.93099	1	0.473359	61.0853
UP_SEQ_FEATURE	active site:Proton donor	12	1.92616	0.0529812	P56545, Q5TFE4, Q9H4A4, P36551, P22102, Q14697, P67775, P09960, P06733, P09104, O43175, P62136	623	194	19113	1.89767	1	0.686292	61.3725
UP_SEQ_FEATURE	binding site:ATP	26	4.17335	0.0537401	P56192, Q3LXA3, P47897, P31153, Q8IWY7, Q96RQ3, Q96PY6, P05165, P53350, P22392, P14625, P38919, O14578, Q8NEV1, Q8IWB6, P11498, P12277, P41252, Q9H2G2, P15531, P07814, P00558, P60891, P11802, Q8TD19, Q9P2J5, Q9BRS2	623	542	19113	1.47169	1	0.688256	61.9099
GOTERM_BP_FAT	GO:0051101~regulation of DNA binding	10	1.60514	0.0539899	Q96JM2, P22392, Q09472, Q92769, P30048, O43593, P23396, P32119, P06748, Q5HY54, P15531	543	121	13528	2.05896	1	0.481136	62.1162
PIR_SUPERFAMILY	PIRSF002072:helix-destabilizing protein	3	0.481541	0.0543179	Q13151, P22626, P51991	319	9	7396	7.72832	1	0.867738	53.0348
GOTERM_BP_FAT	GO:0009063~cellular amino acid catabolic process	7	1.1236	0.0544422	P35520, Q9HCC0, P00367, P23378, Q02252, P00505, Q96RQ3	543	68	13528	2.56462	1	0.482325	62.4318
GOTERM_CC_FAT	GO:0042995~cell projection	37	5.939	0.0547756	P46940, P80723, Q14573, P60953, O60610, O95425, Q96N67, P30086, P09622, Q4VCS5, P62136, P12814, P33176, P22392, O15078, P08670, O75592, O43707, Q5T1M5, P23396, O95180, Q9Y490, Q86VQ3, P00338, Q16643, Q5TZA2, O60282, Q7Z2K8, P35579, P15531, P35580, Q9BV73, Q7Z406, Q9UI47, Q9Y566, P61158, P46821, P00918	501	697	12782	1.35435	1	0.227409	55.1212
SP_PIR_KEYWORDS	systemic lupus erythematosus	4	0.642055	0.0553942	P05455, P12956, P10155, P12004	623	27	19235	4.57404	1	0.224976	55.8092
INTERPRO	IPR017868:Filamin/ABP280 repeat-like	3	0.481541	0.0555631	O75592, O75369, Q5HY54	590	11	16659	7.70062	1	0.590393	60.2029
INTERPRO	IPR015650:Heavy chain of Myosin	3	0.481541	0.0555631	Q9Y2K3, P13535, Q9Y623	590	11	16659	7.70062	1	0.590393	60.2029
SP_PIR_KEYWORDS	dna condensation	3	0.481541	0.0556018	Q9BPX3, Q15021, O95347	623	12	19235	7.7187	1	0.223918	55.9481
SP_PIR_KEYWORDS	epidermolysis bullosa	3	0.481541	0.0556018	Q02388, Q15149, Q9UMD9	623	12	19235	7.7187	1	0.223918	55.9481
SP_PIR_KEYWORDS	alternative initiation	6	0.963082	0.0557756	P30044, P06733, P07954, P31946, P54136, P28838	623	64	19235	2.89451	1	0.222756	56.0642
INTERPRO	IPR015421:Pyridoxal phosphate-dependent transferase, major region, subdomain 1	5	0.802568	0.0559114	Q9Y617, P23378, P34897, P00505, P04181	590	41	16659	3.44337	1	0.587903	60.4388
GOTERM_BP_FAT	GO:0006221~pyrimidine nucleotide biosynthetic process	4	0.642055	0.0559582	P17812, P22392, P60891, P11172, P15531	543	22	13528	4.52972	1	0.490262	63.4713
UP_SEQ_FEATURE	site:Important for catalytic activity	3	0.481541	0.056237	Q96KP4, P30084, P40939	623	12	19113	7.66974	1	0.701869	63.6284
UP_SEQ_FEATURE	repeat:HAT 4	3	0.481541	0.056237	Q15020, O94906, Q12996	623	12	19113	7.66974	1	0.701869	63.6284
GOTERM_BP_FAT	GO:0030705~cytoskeleton-dependent intracellular transport	6	0.963082	0.0562978	P35580, P33176, P42704, Q7Z406, P35579, Q9Y623	543	52	13528	2.87463	1	0.490671	63.7005
GOTERM_BP_FAT	GO:0042254~ribosome biogenesis	10	1.60514	0.0563274	Q9Y2L1, P46777, P62424, P05388, Q9UQ80, P38919, P62263, P56537, P06748, Q2NL82	543	122	13528	2.04209	1	0.489136	63.7204
UP_SEQ_FEATURE	repeat:WD 7	10	1.60514	0.0567833	Q9Y3F4, Q9NSI6, O75083, Q15751, Q9UMS4, P35606, O60907, P63244, Q99698, O43172	623	150	19113	2.04526	1	0.702195	63.9946
INTERPRO	IPR018200:Peptidase C19, ubiquitin carboxyl-terminal hydrolase 2, conserved site	6	0.963082	0.0570387	Q86UV5, Q70CQ2, P45974, Q70CQ4, Q9UPU5, Q93009	590	59	16659	2.87142	1	0.590637	61.1934
GOTERM_BP_FAT	GO:0006107~oxaloacetate metabolic process	3	0.481541	0.0582613	P11498, P40926, P00505	543	10	13528	7.47403	1	0.499405	64.9989
GOTERM_BP_FAT	GO:0016192~vesicle-mediated transport	32	5.13644	0.0583568	P62820, P61204, P55735, Q9ULV4, O00291, P35606, O14617, Q13492, P53621, P22392, Q9Y678, Q9Y6V0, Q00610, P55072, Q5HY54, P63104, Q01518, Q9UJY4, Q9Y6D5, Q7Z3T8, P41250, Q99698, P15531, P01266, P35580, Q9UBF2, O43896, O75131, P48444, Q10567, O95782, Q14C86, P53618	543	576	13528	1.38408	1	0.498271	65.0609
GOTERM_MF_FAT	GO:0016862~intramolecular oxidoreductase activity, interconverting keto- and enol-groups	3	0.481541	0.0588275	Q15084, P07237, P14174	524	10	12983	7.43302	1	0.424338	60.2967
GOTERM_BP_FAT	GO:0046364~monosaccharide biosynthetic process	5	0.802568	0.0593488	P11498, P60174, P52209, P09104, P06737	543	37	13528	3.36668	1	0.502584	65.6991
GOTERM_BP_FAT	GO:0051648~vesicle localization	5	0.802568	0.0593488	P53621, Q9Y678, P48444, P35606, P53618	543	37	13528	3.36668	1	0.502584	65.6991
BIOCARTA	h_iresPathway:Internal Ribosome entry pathway	3	0.481541	0.0598012	Q14152, A6NLN1, P60842	86	7	1437	7.16113	0.999649	0.679021	51.1844
INTERPRO	IPR012680:Laminin G, subdomain 2	5	0.802568	0.0601438	Q6V0I7, P25940, Q9NYQ6, Q17RW2, P12107	590	42	16659	3.36138	1	0.605928	63.2025
SP_PIR_KEYWORDS	pyroglutamic acid	5	0.802568	0.060762	P12110, P02458, P02452, P25705, P02461	623	46	19235	3.35596	1	0.238732	59.2746
GOTERM_CC_FAT	GO:0019867~outer membrane	9	1.44462	0.0609931	Q8IVL0, Q14573, P42704, O00429, O95573, Q86UT6, P30086, P19367, Q9Y277	501	108	12782	2.12608	1	0.248269	59.142
GOTERM_CC_FAT	GO:0048471~perinuclear region of cytoplasm	18	2.88925	0.0609936	P61204, Q9H553, P46060, P35527, P27797, P31946, Q8N3K9, P49454, P15531, P08133, P01266, P33176, P22392, P42704, P14625, Q9BV73, O43707, Q9H3U1, P46821	501	288	12782	1.59456	1	0.246165	59.1423
UP_SEQ_FEATURE	domain:Bromo	4	0.642055	0.0615404	Q09472, Q9ULI0, Q9NR48, Q13263	623	28	19113	4.38271	1	0.728647	67.0392
GOTERM_BP_FAT	GO:0060249~anatomical structure homeostasis	9	1.44462	0.0624839	Q15185, Q13085, Q92878, P02458, P12956, P04075, P07954, P09874, P78527	543	106	13528	2.11529	1	0.51945	67.6444
GOTERM_BP_FAT	GO:0030048~actin filament-based movement	4	0.642055	0.0625062	P35580, Q7Z406, P35579, Q9Y623	543	23	13528	4.33277	1	0.517858	67.6578
SP_PIR_KEYWORDS	biotin binding	2	0.321027	0.0636297	P05165, Q13085	623	2	19235	30.8748	1	0.246874	61.0207
KEGG_PATHWAY	hsa04512:ECM-receptor interaction	9	1.44462	0.0638856	P25940, P12110, P02458, P08572, P02452, P12107, A6NMZ7, P02461, P02462	261	84	5085	2.08744	0.999909	0.332834	54.1555
UP_SEQ_FEATURE	region of interest:2 X 16 AA Gly-rich approximate repeats	2	0.321027	0.0640292	P55795, P31943	623	2	19113	30.679	1	0.73994	68.5337
UP_SEQ_FEATURE	repeat:HEAT 27	2	0.321027	0.0640292	Q5VYK3, Q86VP6	623	2	19113	30.679	1	0.73994	68.5337
UP_SEQ_FEATURE	region of interest:Sufficient for nuclear localization	2	0.321027	0.0640292	Q6P2E9, P49454	623	2	19113	30.679	1	0.73994	68.5337
UP_SEQ_FEATURE	repeat:PC 7	2	0.321027	0.0640292	Q13200, Q99460	623	2	19113	30.679	1	0.73994	68.5337
UP_SEQ_FEATURE	repeat:PC 5	2	0.321027	0.0640292	Q13200, Q99460	623	2	19113	30.679	1	0.73994	68.5337
UP_SEQ_FEATURE	propeptide:N-terminal propeptide (7S domain)	2	0.321027	0.0640292	P08572, P02462	623	2	19113	30.679	1	0.73994	68.5337
UP_SEQ_FEATURE	repeat:PC 6	2	0.321027	0.0640292	Q13200, Q99460	623	2	19113	30.679	1	0.73994	68.5337
UP_SEQ_FEATURE	chain:Fibrous sheath-interacting protein 2	2	0.321027	0.0640292	Q5CZC0	623	2	19113	30.679	1	0.73994	68.5337
UP_SEQ_FEATURE	chain:DNA damage-binding protein 1	2	0.321027	0.0640292	Q16531	623	2	19113	30.679	1	0.73994	68.5337
UP_SEQ_FEATURE	region of interest:2 X 19 AA perfect repeats	2	0.321027	0.0640292	P55795, P31943	623	2	19113	30.679	1	0.73994	68.5337
UP_SEQ_FEATURE	short sequence motif:DECD box	2	0.321027	0.0640292	O00148, Q13838	623	2	19113	30.679	1	0.73994	68.5337
UP_SEQ_FEATURE	site:Cleavage; by procollagen C-endopeptidase	2	0.321027	0.0640292	P02458, P02452	623	2	19113	30.679	1	0.73994	68.5337
UP_SEQ_FEATURE	region of interest:Interaction with CDT1	2	0.321027	0.0640292	Q16531	623	2	19113	30.679	1	0.73994	68.5337
UP_SEQ_FEATURE	short sequence motif:DEVD box	2	0.321027	0.0640292	Q9NR30, Q9BQ39	623	2	19113	30.679	1	0.73994	68.5337
UP_SEQ_FEATURE	chain:Eukaryotic translation initiation factor 3 subunit C	2	0.321027	0.0640292	Q99613	623	2	19113	30.679	1	0.73994	68.5337
UP_SEQ_FEATURE	region of interest:Interaction with ATRIP	2	0.321027	0.0640292	P33993, Q9UPV0	623	2	19113	30.679	1	0.73994	68.5337
UP_SEQ_FEATURE	site:Cleavage; by procollagen N-endopeptidase	2	0.321027	0.0640292	P02458, P02452	623	2	19113	30.679	1	0.73994	68.5337
UP_SEQ_FEATURE	region of interest:Nonhelical region (N-terminal)	2	0.321027	0.0640292	P02452, P02461	623	2	19113	30.679	1	0.73994	68.5337
UP_SEQ_FEATURE	region of interest:Interaction with CUL4A	2	0.321027	0.0640292	Q16531	623	2	19113	30.679	1	0.73994	68.5337
UP_SEQ_FEATURE	region of interest:Interaction with CDT1 and CUL4A	2	0.321027	0.0640292	Q16531	623	2	19113	30.679	1	0.73994	68.5337
INTERPRO	IPR001394:Peptidase C19, ubiquitin carboxyl-terminal hydrolase 2	6	0.963082	0.0640786	Q86UV5, Q70CQ2, P45974, Q70CQ4, Q9UPU5, Q93009	590	61	16659	2.77727	1	0.625297	65.6084
GOTERM_BP_FAT	GO:0006986~response to unfolded protein	7	1.1236	0.0645808	P31689, P34932, P10809, P49588, P50454, P55072, Q92598	543	71	13528	2.45626	1	0.528055	68.8869
UP_SEQ_FEATURE	repeat:HAT 3	3	0.481541	0.0650644	Q15020, O94906, Q12996	623	13	19113	7.07976	1	0.742659	69.1363
UP_SEQ_FEATURE	repeat:HAT 1	3	0.481541	0.0650644	Q15020, O94906, Q12996	623	13	19113	7.07976	1	0.742659	69.1363
UP_SEQ_FEATURE	repeat:HAT 2	3	0.481541	0.0650644	Q15020, O94906, Q12996	623	13	19113	7.07976	1	0.742659	69.1363
INTERPRO	IPR013126:Heat shock protein 70	3	0.481541	0.0651518	P34932, P38646, Q92598	590	12	16659	7.0589	1	0.626988	66.2386
INTERPRO	IPR004365:Nucleic acid binding, OB-fold, tRNA/helicase-type	3	0.481541	0.0651518	O43776, P14868, Q6PI48	590	12	16659	7.0589	1	0.626988	66.2386
INTERPRO	IPR001023:Heat shock protein Hsp70	3	0.481541	0.0651518	P34932, P38646, Q92598	590	12	16659	7.0589	1	0.626988	66.2386
GOTERM_BP_FAT	GO:0051789~response to protein stimulus	9	1.44462	0.0652911	P31689, P34932, P10809, P49588, P50454, P61158, P55072, P46821, Q92598	543	107	13528	2.09552	1	0.530351	69.2975
UP_SEQ_FEATURE	repeat:LRR 3	16	2.56822	0.0653492	Q7Z7L7, Q13045, Q9BTT0, Q6F5E8, Q5CZC0, Q14160, Q29RF7, P46060, Q7Z7A1, Q92688, Q8WXI7, P13489, Q8WXH0, Q8N1G4, Q86UT6	623	299	19113	1.64168	1	0.741186	69.3002
SP_PIR_KEYWORDS	mental retardation	6	0.963082	0.0654168	P46100, P51816, Q99714, P54886, Q7Z6Z7, P31150	623	67	19235	2.76491	1	0.251122	62.0733
SP_PIR_KEYWORDS	GTP binding	6	0.963082	0.0654168	P62820, P61204, P60953, P49411, O00429, P41091	623	67	19235	2.76491	1	0.251122	62.0733
GOTERM_BP_FAT	GO:0042981~regulation of apoptosis	42	6.74157	0.0664579	P52701, Q96PE2, Q14160, O00291, P27797, P31947, P30153, P14174, P31946, P23528, P78527, Q13547, P12814, P51398, P22392, P30044, P14625, P08243, P02458, P30048, Q13564, Q13618, P08758, O43707, P32119, P55072, P23396, Q06830, P63104, P49588, Q9BZZ5, Q04760, Q99698, P38646, P06748, P15531, P09211, P62258, P10809, P67775, Q8TDM6, Q12802, P63241	543	804	13528	1.30145	1	0.535154	69.9609
GOTERM_CC_FAT	GO:0005794~Golgi apparatus	44	7.0626	0.0670211	P62820, O95996, Q5VYK3, P61204, Q8IWJ2, O00291, P31948, P35606, P30086, O14617, Q96RQ3, Q13492, P53621, Q7KZF4, Q9Y678, O00429, O75081, Q13618, Q00610, Q9Y266, Q5HY54, Q9P212, Q4G0J3, Q6IQ22, Q9UJY4, Q15751, Q9Y6D5, Q96P48, P49327, P01266, P50395, P42356, Q14697, Q9UBF2, Q14204, O43896, O00763, P22059, P48444, Q10567, Q14789, O95782, P61158, P53618	501	872	12782	1.28735	1	0.265432	62.7183
UP_SEQ_FEATURE	short sequence motif:Bipartite nuclear localization signal	4	0.642055	0.0670458	Q12906, Q15021, P31948, O60506	623	29	19113	4.23158	1	0.747418	70.2596
GOTERM_CC_FAT	GO:0016363~nuclear matrix	6	0.963082	0.0671673	Q9Y230, P43243, P23246, Q9Y265, P23528, P49454	501	56	12782	2.73353	1	0.263758	62.8012
SP_PIR_KEYWORDS	transport	66	10.5939	0.0687958	P62820, Q14573, P55735, P61204, P55060, O14617, P49321, P53621, O15078, P49792, P38606, Q8N1F7, P13804, Q13428, P62826, Q9HAV4, O43707, Q5T1M5, P05023, O00629, P52294, Q8WUM0, Q92973, Q9UJY4, Q8WUM4, Q8TEX9, Q96P70, O60684, P42704, Q9UBF2, Q9P2E9, Q8NI27, O95782, Q10567, Q0VD83, O60518, P63241, Q9Y277, O00410, Q14974, Q9UIA9, P35606, P00505, P16615, Q9HBR0, Q96D46, O95373, Q9Y678, P52292, P38919,…	623	1670	19235	1.2202	1	0.260653	63.9917
KEGG_PATHWAY	hsa05416:Viral myocarditis	8	1.28411	0.0691671	O43432, P35580, Q7Z406, Q9Y2K3, P35749, P35579, P13535, Q9Y623	261	71	5085	2.19524	0.999959	0.343671	57.1196
KEGG_PATHWAY	hsa03018:RNA degradation	7	1.1236	0.0692157	Q6P2E9, A5YKK6, Q9Y2L1, P10809, P06733, P09104, P38646	261	57	5085	2.39262	0.999959	0.332719	57.1461
UP_SEQ_FEATURE	repeat:LRR 4	14	2.24719	0.0692169	Q13045, Q9BTT0, Q6F5E8, Q5CZC0, Q14160, P46060, Q7Z7A1, Q92688, Q8WXI7, P13489, Q8N1G4, Q8WXH0, Q86UT6	623	252	19113	1.70439	1	0.755871	71.446
GOTERM_CC_FAT	GO:0030016~myofibril	9	1.44462	0.0693075	P12814, P18206, O95425, Q9Y2K3, P06733, P04075, O75369, P13535, Q9Y623	501	111	12782	2.06862	1	0.268969	63.9968
GOTERM_BP_FAT	GO:0019321~pentose metabolic process	3	0.481541	0.069365	P60891, P52209, P06737	543	11	13528	6.79458	1	0.549303	71.5555
GOTERM_BP_FAT	GO:0009083~branched chain family amino acid catabolic process	3	0.481541	0.069365	Q9HCC0, Q02252, Q96RQ3	543	11	13528	6.79458	1	0.549303	71.5555
GOTERM_BP_FAT	GO:0009070~serine family amino acid biosynthetic process	3	0.481541	0.069365	P35520, Q9Y617, O43175	543	11	13528	6.79458	1	0.549303	71.5555
GOTERM_BP_FAT	GO:0009066~aspartate family amino acid metabolic process	4	0.642055	0.0693915	Q9BV20, P08243, P00505, O43175	543	24	13528	4.15224	1	0.547732	71.5697
GOTERM_BP_FAT	GO:0002562~somatic diversification of immune receptors via germline recombination within a single locus	4	0.642055	0.0693915	P52701, P10809, P12956, P78527	543	24	13528	4.15224	1	0.547732	71.5697
GOTERM_BP_FAT	GO:0016444~somatic cell DNA recombination	4	0.642055	0.0693915	P52701, P10809, P12956, P78527	543	24	13528	4.15224	1	0.547732	71.5697
INTERPRO	IPR004106:Peptidase S9A, oligopeptidase, N-terminal beta-propeller	2	0.321027	0.0694645	P48147, Q4J6C6	590	2	16659	28.2356	1	0.646834	68.6632
INTERPRO	IPR013932:TATA-binding protein interacting (TIP20)	2	0.321027	0.0694645	O75155, Q86VP6	590	2	16659	28.2356	1	0.646834	68.6632
INTERPRO	IPR013815:ATP-grasp fold, subdomain 1	2	0.321027	0.0694645	P22102, Q96RQ3	590	2	16659	28.2356	1	0.646834	68.6632
INTERPRO	IPR013537:Acetyl-CoA carboxylase, central region	2	0.321027	0.0694645	Q13085, O00763	590	2	16659	28.2356	1	0.646834	68.6632
INTERPRO	IPR013040:Coatomer, gamma subunit, appendage, Ig-like subdomain	2	0.321027	0.0694645	Q9UBF2, Q9Y678	590	2	16659	28.2356	1	0.646834	68.6632
INTERPRO	IPR014863:Coatomer, gamma subunit , appendage	2	0.321027	0.0694645	Q9UBF2, Q9Y678	590	2	16659	28.2356	1	0.646834	68.6632
INTERPRO	IPR014347:Tautomerase	2	0.321027	0.0694645	P30046, P14174	590	2	16659	28.2356	1	0.646834	68.6632
INTERPRO	IPR008905:Eukaryotic translation initiation factor 3 subunit 8, N-terminal	2	0.321027	0.0694645	Q99613	590	2	16659	28.2356	1	0.646834	68.6632
INTERPRO	IPR012562:GUCT	2	0.321027	0.0694645	Q9NR30, Q9BQ39	590	2	16659	28.2356	1	0.646834	68.6632
INTERPRO	IPR001844:Chaperonin Cpn60	2	0.321027	0.0694645	P10809, Q99832	590	2	16659	28.2356	1	0.646834	68.6632
INTERPRO	IPR002470:Peptidase S9A, prolyl oligopeptidase	2	0.321027	0.0694645	P48147, Q4J6C6	590	2	16659	28.2356	1	0.646834	68.6632
INTERPRO	IPR006692:Coatomer, WD associated region	2	0.321027	0.0694645	P53621, P35606	590	2	16659	28.2356	1	0.646834	68.6632
INTERPRO	IPR000806:Rab GDI protein	2	0.321027	0.0694645	P50395, P31150	590	2	16659	28.2356	1	0.646834	68.6632
INTERPRO	IPR014886:RNA binding motif	2	0.321027	0.0694645	Q4G0J3, P05455	590	2	16659	28.2356	1	0.646834	68.6632
INTERPRO	IPR010339:TIP49, C-terminal	2	0.321027	0.0694645	Q9Y230, Q9Y265	590	2	16659	28.2356	1	0.646834	68.6632
INTERPRO	IPR017106:Coatomer, gamma subunit	2	0.321027	0.0694645	Q9UBF2, Q9Y678	590	2	16659	28.2356	1	0.646834	68.6632
INTERPRO	IPR005146:B3/B4 tRNA-binding domain	2	0.321027	0.0694645	Q8N1G4, Q9NSD9	590	2	16659	28.2356	1	0.646834	68.6632
UP_SEQ_FEATURE	cross-link:Glycyl lysine isopeptide (Lys-Gly) (interchain with G-Cter in SUMO)	7	1.1236	0.0701031	Q13547, P35520, P52597, P49792, O75643, P46060, P06748	623	89	19113	2.41295	1	0.757481	71.9173
UP_SEQ_FEATURE	compositionally biased region:Poly-Asp	7	1.1236	0.0701031	O75155, Q14974, O94906, Q5T4S7, P46100, P35716, Q5T1M5	623	89	19113	2.41295	1	0.757481	71.9173
SMART	SM00232:JAB_MPN	3	0.481541	0.0707384	P51665, Q6P2Q9, O00303	311	13	9079	6.73683	1	0.514788	60.3362
KEGG_PATHWAY	hsa00250:Alanine, aspartate and glutamate metabolism	5	0.802568	0.0710667	Q06210, P00367, P08243, P30520, P00505	261	31	5085	3.14238	0.999969	0.329532	58.142
KEGG_PATHWAY	hsa00310:Lysine degradation	6	0.963082	0.071928	P24752, P30084, P40939, Q9NR48, P30837, P05091	261	44	5085	2.65674	0.999973	0.32282	58.5983
GOTERM_BP_FAT	GO:0051783~regulation of nuclear division	6	0.963082	0.0728497	O14744, P60953, O75592, P18754, P30086, P49454	543	56	13528	2.6693	1	0.564213	73.3618
GOTERM_BP_FAT	GO:0007088~regulation of mitosis	6	0.963082	0.0728497	O14744, P60953, O75592, P18754, P30086, P49454	543	56	13528	2.6693	1	0.564213	73.3618
GOTERM_BP_FAT	GO:0042542~response to hydrogen peroxide	6	0.963082	0.0728497	P30041, Q09472, P30048, P02452, P32119, Q06830	543	56	13528	2.6693	1	0.564213	73.3618
GOTERM_MF_FAT	GO:0060589~nucleoside-triphosphatase regulator activity	24	3.85233	0.0730276	P46940, Q9P212, O60343, Q96PE2, Q9Y2L1, Q96N67, Q9Y6D5, P46060, P18754, Q15751, Q96P48, Q86YV0, O60292, P49796, P50395, O95373, Q12802, O95433, Q14C86, P31150, Q9BZ29, O14578, Q86YR7, O00410	524	413	12983	1.43981	1	0.494639	68.5057
GOTERM_BP_FAT	GO:0043067~regulation of programmed cell death	42	6.74157	0.0734965	P52701, Q96PE2, Q14160, O00291, P27797, P31947, P30153, P14174, P31946, P23528, P78527, Q13547, P12814, P51398, P22392, P30044, P14625, P08243, P02458, P30048, Q13564, Q13618, P08758, O43707, P32119, P55072, P23396, Q06830, P63104, P49588, Q9BZZ5, Q04760, Q99698, P38646, P06748, P15531, P09211, P62258, P10809, P67775, Q8TDM6, Q12802, P63241	543	812	13528	1.28863	1	0.565827	73.6849
GOTERM_BP_FAT	GO:0006164~purine nucleotide biosynthetic process	11	1.76565	0.073892	P22392, P22102, P60891, P38606, P30520, P04075, P25705, P49915, P31939, P05023, P16615, P15531	543	148	13528	1.85167	1	0.566142	73.8807
UP_SEQ_FEATURE	repeat:LRR 9	9	1.44462	0.074011	Q13045, Q8WXI7, P13489, Q6F5E8, Q14160, Q8WXH0, Q5CZC0, Q7Z7A1	623	135	19113	2.04526	1	0.773762	73.9097
UP_SEQ_FEATURE	domain:RRM 4	3	0.481541	0.074317	Q9H361, P19338, A6NLN1	623	14	19113	6.57407	1	0.772389	74.0599
UP_SEQ_FEATURE	domain:CS	3	0.481541	0.074317	Q15185, Q9UHD1, Q9Y266	623	14	19113	6.57407	1	0.772389	74.0599
UP_SEQ_FEATURE	domain:Ras-GAP	3	0.481541	0.074317	P46940, Q14C86, Q86YV0	623	14	19113	6.57407	1	0.772389	74.0599
UP_SEQ_FEATURE	binding site:Coenzyme A	3	0.481541	0.074317	P24752, Q13085, O00763	623	14	19113	6.57407	1	0.772389	74.0599
INTERPRO	IPR016160:Aldehyde dehydrogenase, conserved site	4	0.642055	0.074951	P36578, Q02252, P30837, P05091	590	28	16659	4.03366	1	0.671288	71.512
GOTERM_CC_FAT	GO:0000792~heterochromatin	5	0.802568	0.0751403	Q92769, P46100, P17987, Q13185, Q13263	501	41	12782	3.11134	1	0.286454	67.0764
GOTERM_CC_FAT	GO:0044449~contractile fiber part	9	1.44462	0.0752179	P12814, P18206, O95425, P06733, P04075, O75369, P35749, P13535, Q9Y623	501	113	12782	2.03201	1	0.284457	67.1157
INTERPRO	IPR000555:Mov34/MPN/PAD-1	3	0.481541	0.0752434	P51665, Q6P2Q9, O00303	590	13	16659	6.51591	1	0.668334	71.6568
OMIM_DISEASE	Mental retardation, X-linked syndromic 10	2	0.321027	0.0753531	Q99714, Q7Z6Z7	142	2	3671	25.8521	1	1	64.9349
GOTERM_CC_FAT	GO:0000777~condensed chromosome kinetochore	6	0.963082	0.0757304	Q8WUM0, Q9Y6D9, Q12888, P46060, P49454, Q2NKX8	501	58	12782	2.63927	1	0.283921	67.3739
SMART	SM00015:IQ	7	1.1236	0.0765233	P46940, P35580, Q7Z406, P35749, P35579, P13535, Q9Y623	311	87	9079	2.34886	1	0.527187	63.3385
GOTERM_BP_FAT	GO:0042743~hydrogen peroxide metabolic process	4	0.642055	0.076603	P30041, P30048, P32119, Q06830	543	25	13528	3.98615	1	0.578054	75.1861
GOTERM_CC_FAT	GO:0005642~annulate lamellae	2	0.321027	0.0767078	O14980, P63241	501	2	12782	25.513	1	0.28491	67.8612
GOTERM_BP_FAT	GO:0010941~regulation of cell death	42	6.74157	0.0771971	P52701, Q96PE2, Q14160, O00291, P27797, P31947, P30153, P14174, P31946, P23528, P78527, Q13547, P12814, P51398, P22392, P30044, P14625, P08243, P02458, P30048, Q13564, Q13618, P08758, O43707, P32119, P55072, P23396, Q06830, P63104, P49588, Q9BZZ5, Q04760, Q99698, P38646, P06748, P15531, P09211, P62258, P10809, P67775, Q8TDM6, Q12802, P63241	543	815	13528	1.28388	1	0.579285	75.4638
GOTERM_MF_FAT	GO:0031072~heat shock protein binding	7	1.1236	0.0772913	P49321, Q16543, P31689, Q99615, Q92769, Q02790, Q08752	524	74	12983	2.34374	1	0.511032	70.6419
GOTERM_MF_FAT	GO:0047485~protein N-terminus binding	7	1.1236	0.0772913	P27348, Q9H553, Q9UQ35, O43707, P09874, Q8NEV1, P63241	524	74	12983	2.34374	1	0.511032	70.6419
GOTERM_BP_FAT	GO:0016054~organic acid catabolic process	9	1.44462	0.0772914	P35520, Q9HCC0, P00367, P23378, P30084, P40939, Q02252, P00505, Q96RQ3	543	111	13528	2.02001	1	0.578058	75.5076
GOTERM_BP_FAT	GO:0046395~carboxylic acid catabolic process	9	1.44462	0.0772914	P35520, Q9HCC0, P00367, P23378, P30084, P40939, Q02252, P00505, Q96RQ3	543	111	13528	2.02001	1	0.578058	75.5076
GOTERM_MF_FAT	GO:0004003~ATP-dependent DNA helicase activity	4	0.642055	0.0775824	Q08211, Q12873, P12956, Q9Y230	524	25	12983	3.96427	1	0.508313	70.7828
GOTERM_BP_FAT	GO:0046292~formaldehyde metabolic process	2	0.321027	0.0785277	Q9Y4C1, P11766	543	2	13528	24.9134	1	0.582398	76.0752
GOTERM_BP_FAT	GO:0006552~leucine catabolic process	2	0.321027	0.0785277	Q9HCC0, Q96RQ3	543	2	13528	24.9134	1	0.582398	76.0752
GOTERM_MF_FAT	GO:0008094~DNA-dependent ATPase activity	6	0.963082	0.0787542	Q09028, Q08211, Q12873, Q9UNY4, P12956, Q9Y230	524	57	12983	2.60808	1	0.50973	71.3432
GOTERM_MF_FAT	GO:0004485~methylcrotonoyl-CoA carboxylase activity	2	0.321027	0.0789471	Q9HCC0, Q96RQ3	524	2	12983	24.7767	1	0.506631	71.4345
GOTERM_MF_FAT	GO:0003989~acetyl-CoA carboxylase activity	2	0.321027	0.0789471	Q13085, O00763	524	2	12983	24.7767	1	0.506631	71.4345
GOTERM_MF_FAT	GO:0008428~ribonuclease inhibitor activity	2	0.321027	0.0789471	P61221, P13489	524	2	12983	24.7767	1	0.506631	71.4345
GOTERM_MF_FAT	GO:0005093~Rab GDP-dissociation inhibitor activity	2	0.321027	0.0789471	P50395, P31150	524	2	12983	24.7767	1	0.506631	71.4345
GOTERM_MF_FAT	GO:0008426~protein kinase C inhibitor activity	2	0.321027	0.0789471	P31947, P61981	524	2	12983	24.7767	1	0.506631	71.4345
GOTERM_BP_FAT	GO:0000302~response to reactive oxygen species	7	1.1236	0.0797066	P30041, P30044, Q09472, P30048, P02452, P32119, Q06830	543	75	13528	2.32525	1	0.586388	76.6049
GOTERM_BP_FAT	GO:0006730~one-carbon metabolic process	9	1.44462	0.0804848	O14744, Q08J23, Q9Y4C1, P26358, Q8N1G2, P46100, P31153, P34897, P00918	543	112	13528	2.00197	1	0.588418	76.9485
GOTERM_BP_FAT	GO:0032507~maintenance of protein location in cell	5	0.802568	0.0804982	Q9Y490, Q9Y566, P31946, O75369, Q5HY54	543	41	13528	3.03822	1	0.586817	76.9544
SMART	SM00323:RasGAP	3	0.481541	0.0807204	P46940, Q14C86, Q86YV0	311	14	9079	6.25563	1	0.531156	65.3842
GOTERM_BP_FAT	GO:0001958~endochondral ossification	3	0.481541	0.0810911	Q5TAT6, P02458, P02452	543	12	13528	6.22836	1	0.587957	77.2129
GOTERM_CC_FAT	GO:0005578~proteinaceous extracellular matrix	19	3.04976	0.0811423	Q02388, P25940, P12110, Q5TAT6, Q96RW7, P08572, P27797, P02452, Q8NFW1, A6NMZ7, P02461, Q9UMD9, P02462, Q2UY09, Q17RW2, P02458, Q14993, P12107, Q05996	501	320	12782	1.51483	1	0.296962	69.9883
GOTERM_MF_FAT	GO:0004221~ubiquitin thiolesterase activity	7	1.1236	0.0813117	Q86UV5, Q70CQ2, Q96G74, P45974, Q70CQ4, Q9UPU5, Q93009	524	75	12983	2.31249	1	0.51344	72.5316
INTERPRO	IPR010987:Glutathione S-transferase, C-terminal-like	4	0.642055	0.0814976	P26641, P56192, P07814, P09211	590	29	16659	3.89456	1	0.694282	74.5933
GOTERM_MF_FAT	GO:0043621~protein self-association	3	0.481541	0.0818567	P36551, P40926, Q9P219	524	12	12983	6.19418	1	0.511969	72.7789
GOTERM_BP_FAT	GO:0006261~DNA-dependent DNA replication	6	0.963082	0.0820189	P33993, P33991, P49643, P49736, Q14566, P25205	543	58	13528	2.57725	1	0.590647	77.6119
GOTERM_BP_FAT	GO:0030518~steroid hormone receptor signaling pathway	6	0.963082	0.0820189	P31689, Q9BWF3, Q9Y4C1, P27797, Q04917, P62826	543	58	13528	2.57725	1	0.590647	77.6119
SP_PIR_KEYWORDS	calcium/phospholipid-binding	3	0.481541	0.0830422	Q9Y6V0, P08758, P08133	623	15	19235	6.17496	1	0.305188	71.1296
SP_PIR_KEYWORDS	cell binding	3	0.481541	0.0830422	P12110, P08572, P02462	623	15	19235	6.17496	1	0.305188	71.1296
UP_SEQ_FEATURE	repeat:LRR 15	5	0.802568	0.0837523	Q13045, P13489, Q6F5E8, Q14160, Q7Z7A1	623	51	19113	3.00774	1	0.81036	78.3118
UP_SEQ_FEATURE	domain:PDZ 4	3	0.481541	0.0839578	Q14160, O15018, Q8TDM6	623	15	19113	6.13579	1	0.808569	78.3967
GOTERM_BP_FAT	GO:0000018~regulation of DNA recombination	4	0.642055	0.0841287	P52294, P52701, Q92878, P52292	543	26	13528	3.83284	1	0.598713	78.4949
PIR_SUPERFAMILY	PIRSF001113:leukotriene-A4 hydrolase	2	0.321027	0.0841493	Q9H4A4, P09960	319	2	7396	23.185	1	0.943051	69.5631
PIR_SUPERFAMILY	PIRSF005593:TGF-beta receptor interacting protein	2	0.321027	0.0841493	Q13347, Q9Y3F4	319	2	7396	23.185	1	0.943051	69.5631
PIR_SUPERFAMILY	PIRSF017001:eukaryotic translation initiation factor 3, subunit 8	2	0.321027	0.0841493	Q99613	319	2	7396	23.185	1	0.943051	69.5631
PIR_SUPERFAMILY	PIRSF015922:cullin-associated NEDD8-dissociated protein	2	0.321027	0.0841493	O75155, Q86VP6	319	2	7396	23.185	1	0.943051	69.5631
PIR_SUPERFAMILY	PIRSF006343:conserved hypothetical protein YDR190c	2	0.321027	0.0841493	Q9Y230, Q9Y265	319	2	7396	23.185	1	0.943051	69.5631
PIR_SUPERFAMILY	PIRSF037093:Coatomer_gamma_subunit	2	0.321027	0.0841493	Q9UBF2, Q9Y678	319	2	7396	23.185	1	0.943051	69.5631
PIR_SUPERFAMILY	PIRSF005602:serine/threonine-protein phosphataser PP2A regulatory subunit A	2	0.321027	0.0841493	P30154, P30153	319	2	7396	23.185	1	0.943051	69.5631
PIR_SUPERFAMILY	PIRSF019647:GDP dissociation inhibitor XAP-4	2	0.321027	0.0841493	P50395, P31150	319	2	7396	23.185	1	0.943051	69.5631
PIR_SUPERFAMILY	PIRSF006397:heat shock protein, Hsp110 type	2	0.321027	0.0841493	P34932, Q92598	319	2	7396	23.185	1	0.943051	69.5631
PIR_SUPERFAMILY	PIRSF037093:coatomer, gamma subunit	2	0.321027	0.0841493	Q9UBF2, Q9Y678	319	2	7396	23.185	1	0.943051	69.5631
UP_SEQ_FEATURE	compositionally biased region:Poly-Pro	20	3.21027	0.0842894	O00629, Q12906, Q9UGU0, Q12873, Q96PE2, Q01518, Q9UMN6, Q7Z7A1, P23246, Q92841, Q9ULD9, Q8IXQ3, Q9BYB0, P48634, Q2LD37, Q9Y566, Q9Y6V0, Q15459, Q8NDH2, Q5T6W2	623	413	19113	1.48566	1	0.807288	78.5329
GOTERM_CC_FAT	GO:0005604~basement membrane	7	1.1236	0.0844678	Q02388, Q2UY09, P02458, Q96RW7, P08572, Q9UMD9, P02462	501	78	12782	2.28963	1	0.305199	71.4966
GOTERM_MF_FAT	GO:0005544~calcium-dependent phospholipid binding	4	0.642055	0.0851918	O75131, Q9Y6V0, P08758, P08133	524	26	12983	3.8118	1	0.522754	74.247
GOTERM_MF_FAT	GO:0050681~androgen receptor binding	4	0.642055	0.0851918	Q9Y4C1, O94906, P27797, P62826	524	26	12983	3.8118	1	0.522754	74.247
INTERPRO	IPR001936:Ras GTPase-activating protein	3	0.481541	0.0857904	P46940, Q14C86, Q86YV0	590	14	16659	6.05048	1	0.709365	76.441
GOTERM_BP_FAT	GO:0070507~regulation of microtubule cytoskeleton organization	5	0.802568	0.0862969	Q9Y6G9, Q9BV73, O14980, P46821, P06748	543	42	13528	2.96589	1	0.606832	79.3681
GOTERM_BP_FAT	GO:0031647~regulation of protein stability	5	0.802568	0.0862969	P10809, P27797, Q9P219, P78527, Q5HY54	543	42	13528	2.96589	1	0.606832	79.3681
GOTERM_BP_FAT	GO:0051260~protein homooligomerization	8	1.28411	0.0865182	Q14573, Q01813, Q99714, P14174, P30086, Q9P219, P08758, P55072	543	95	13528	2.09797	1	0.606181	79.4553
GOTERM_BP_FAT	GO:0051100~negative regulation of binding	6	0.963082	0.0868226	Q96JM2, Q92769, O43593, P23396, P32119, Q5HY54	543	59	13528	2.53357	1	0.605903	79.5747
GOTERM_BP_FAT	GO:0051052~regulation of DNA metabolic process	9	1.44462	0.0871034	P52294, P52701, Q92878, P67775, P52292, P27797, P30153, P23396, P12004	543	114	13528	1.96685	1	0.605523	79.6842
INTERPRO	IPR000048:IQ calmodulin-binding region	7	1.1236	0.087553	P46940, P35580, Q7Z406, P35749, P35579, P13535, Q9Y623	590	87	16659	2.27183	1	0.712805	77.1625
GOTERM_MF_FAT	GO:0008307~structural constituent of muscle	5	0.802568	0.0876184	Q15149, O76041, P35749, P13535, Q9Y623	524	42	12983	2.94961	1	0.529288	75.2684
GOTERM_BP_FAT	GO:0006732~coenzyme metabolic process	11	1.76565	0.0876611	P60174, Q13085, P11177, P40926, P52209, P53396, Q04760, P07954, P48735, Q99798, P09622	543	153	13528	1.79116	1	0.606363	79.9002
GOTERM_BP_FAT	GO:0040029~regulation of gene expression, epigenetic	7	1.1236	0.0879529	Q7KZF4, P26358, Q9BXP5, Q92769, P46100, Q9UMN6, O14929	543	77	13528	2.26486	1	0.606034	80.0124
GOTERM_CC_FAT	GO:0045120~pronucleus	3	0.481541	0.0896144	Q92878, P14866, P49454	501	13	12782	5.88761	1	0.318821	73.6927
SP_PIR_KEYWORDS	Endocytosis	7	1.1236	0.0909139	Q13492, P22392, O00291, O95782, Q10567, Q14C86, Q5T1M5, P15531	623	96	19235	2.25129	1	0.327581	74.4851
UP_SEQ_FEATURE	metal ion-binding site:Manganese	4	0.642055	0.0911646	P11498, P22102, P67775, P62136	623	33	19113	3.71866	1	0.830188	81.1816
GOTERM_BP_FAT	GO:0043543~protein amino acid acylation	6	0.963082	0.0917703	Q09472, Q92794, P30419, Q9Y230, Q9Y265, O14929	543	60	13528	2.49134	1	0.620801	81.426
GOTERM_CC_FAT	GO:0031252~cell leading edge	10	1.60514	0.0918514	P46940, P22392, Q9Y490, O60610, Q9UI47, Q14160, P61158, P23396, P35579, Q4VCS5, P15531	501	138	12782	1.84877	1	0.323285	74.5974
GOTERM_BP_FAT	GO:0002200~somatic diversification of immune receptors	4	0.642055	0.0919561	P52701, P10809, P12956, P78527	543	27	13528	3.69088	1	0.619987	81.4924
GOTERM_BP_FAT	GO:0009310~amine catabolic process	7	1.1236	0.0922447	P35520, Q9HCC0, P00367, P23378, Q02252, P00505, Q96RQ3	543	78	13528	2.23582	1	0.619608	81.595
GOTERM_BP_FAT	GO:0019058~viral infectious cycle	5	0.802568	0.0922924	P56545, P62937, O00267, P12956, O43719	543	43	13528	2.89691	1	0.618226	81.6119
GOTERM_BP_FAT	GO:0006112~energy reserve metabolic process	5	0.802568	0.0922924	Q06210, P35573, P11216, P06737, P62136	543	43	13528	2.89691	1	0.618226	81.6119
GOTERM_BP_FAT	GO:0034599~cellular response to oxidative stress	5	0.802568	0.0922924	P30041, P30044, P30048, P32119, Q06830	543	43	13528	2.89691	1	0.618226	81.6119
GOTERM_MF_FAT	GO:0030695~GTPase regulator activity	23	3.69181	0.0928794	P46940, Q9P212, O60343, Q96PE2, Q9Y2L1, Q96N67, Q9Y6D5, P46060, P18754, Q15751, Q96P48, Q86YV0, O60292, P49796, P50395, O95373, Q12802, Q14C86, P31150, Q9BZ29, O14578, Q86YR7, O00410	524	404	12983	1.41056	1	0.547251	77.3542
GOTERM_BP_FAT	GO:0051186~cofactor metabolic process	13	2.08668	0.0929545	P60174, P40926, P36551, Q04760, P48735, P09622, Q96RQ3, P11177, Q13085, P52209, P53396, P07954, Q99798	543	195	13528	1.6609	1	0.619412	81.845
GOTERM_MF_FAT	GO:0030145~manganese ion binding	11	1.76565	0.0930231	P11498, Q5T6H7, Q13085, P22102, Q3LXA3, P67775, O00763, P48735, P28838, O15355, P62136	524	154	12983	1.76977	1	0.544	77.4088
GOTERM_MF_FAT	GO:0051219~phosphoprotein binding	4	0.642055	0.0931045	P62258, Q02790, P31946, Q7Z2K8	524	27	12983	3.67062	1	0.540543	77.4397
KEGG_PATHWAY	hsa00051:Fructose and mannose metabolism	5	0.802568	0.0931804	P60174, Q01813, P04075, P19367, P17858	261	34	5085	2.86511	0.999999	0.388935	68.5107
GOTERM_BP_FAT	GO:0007076~mitotic chromosome condensation	3	0.481541	0.0933722	Q9BPX3, Q15021, O95347	543	13	13528	5.74926	1	0.619575	81.9907
UP_SEQ_FEATURE	compositionally biased region:Poly-Ala	19	3.04976	0.0935796	Q9UGU0, Q13045, Q9NX46, Q12873, P52701, Q8TAQ2, Q5T4S7, O60907, P50454, Q8NFW1, Q9ULD9, Q9BWF3, Q8N1G4, Q9BYB0, O14654, O60518, Q13263, A6NLN1, O00410	623	393	19113	1.48321	1	0.835992	82.0365
SP_PIR_KEYWORDS	pentose shunt	2	0.321027	0.0939122	P60174, P52209	623	3	19235	20.5832	1	0.334435	75.6648
SP_PIR_KEYWORDS	Serine biosynthesis	2	0.321027	0.0939122	Q9Y617, O43175	623	3	19235	20.5832	1	0.334435	75.6648
UP_SEQ_FEATURE	repeat:Filamin 6	2	0.321027	0.0944919	O75369, Q5HY54	623	3	19113	20.4526	1	0.836652	82.3499
UP_SEQ_FEATURE	domain:Collagen-like 12	2	0.321027	0.0944919	Q17RW2, Q8NFW1	623	3	19113	20.4526	1	0.836652	82.3499
UP_SEQ_FEATURE	repeat:Filamin 5	2	0.321027	0.0944919	O75369, Q5HY54	623	3	19113	20.4526	1	0.836652	82.3499
UP_SEQ_FEATURE	site:May be involved in allosteric control	2	0.321027	0.0944919	P11216, P06737	623	3	19113	20.4526	1	0.836652	82.3499
UP_SEQ_FEATURE	repeat:Filamin 16	2	0.321027	0.0944919	O75369, Q5HY54	623	3	19113	20.4526	1	0.836652	82.3499
UP_SEQ_FEATURE	repeat:PC 4	2	0.321027	0.0944919	Q13200, Q99460	623	3	19113	20.4526	1	0.836652	82.3499
UP_SEQ_FEATURE	repeat:Filamin 19	2	0.321027	0.0944919	O75369, Q5HY54	623	3	19113	20.4526	1	0.836652	82.3499
UP_SEQ_FEATURE	region of interest:Hinge 1	2	0.321027	0.0944919	O75369, Q5HY54	623	3	19113	20.4526	1	0.836652	82.3499
UP_SEQ_FEATURE	repeat:Filamin 9	2	0.321027	0.0944919	O75369, Q5HY54	623	3	19113	20.4526	1	0.836652	82.3499
UP_SEQ_FEATURE	repeat:Filamin 13	2	0.321027	0.0944919	O75369, Q5HY54	623	3	19113	20.4526	1	0.836652	82.3499
UP_SEQ_FEATURE	repeat:Filamin 20	2	0.321027	0.0944919	O75369, Q5HY54	623	3	19113	20.4526	1	0.836652	82.3499
UP_SEQ_FEATURE	repeat:PC 1	2	0.321027	0.0944919	Q13200, Q99460	623	3	19113	20.4526	1	0.836652	82.3499
UP_SEQ_FEATURE	repeat:Filamin 7	2	0.321027	0.0944919	O75369, Q5HY54	623	3	19113	20.4526	1	0.836652	82.3499
UP_SEQ_FEATURE	domain:Collagen-like 10	2	0.321027	0.0944919	Q17RW2, Q8NFW1	623	3	19113	20.4526	1	0.836652	82.3499
UP_SEQ_FEATURE	repeat:Filamin 18	2	0.321027	0.0944919	O75369, Q5HY54	623	3	19113	20.4526	1	0.836652	82.3499
UP_SEQ_FEATURE	repeat:Filamin 23	2	0.321027	0.0944919	O75369, Q5HY54	623	3	19113	20.4526	1	0.836652	82.3499
UP_SEQ_FEATURE	domain:Collagen-like 14	2	0.321027	0.0944919	Q17RW2, Q8NFW1	623	3	19113	20.4526	1	0.836652	82.3499
UP_SEQ_FEATURE	domain:Collagen-like 16	2	0.321027	0.0944919	Q17RW2, Q8NFW1	623	3	19113	20.4526	1	0.836652	82.3499
UP_SEQ_FEATURE	repeat:PC 3	2	0.321027	0.0944919	Q13200, Q99460	623	3	19113	20.4526	1	0.836652	82.3499
UP_SEQ_FEATURE	repeat:Filamin 17	2	0.321027	0.0944919	O75369, Q5HY54	623	3	19113	20.4526	1	0.836652	82.3499
UP_SEQ_FEATURE	repeat:Filamin 11	2	0.321027	0.0944919	O75369, Q5HY54	623	3	19113	20.4526	1	0.836652	82.3499
UP_SEQ_FEATURE	repeat:36; approximate	2	0.321027	0.0944919	Q9P2E9, Q92954	623	3	19113	20.4526	1	0.836652	82.3499
UP_SEQ_FEATURE	region of interest:Hinge 2	2	0.321027	0.0944919	O75369, Q5HY54	623	3	19113	20.4526	1	0.836652	82.3499
UP_SEQ_FEATURE	repeat:Filamin 22	2	0.321027	0.0944919	O75369, Q5HY54	623	3	19113	20.4526	1	0.836652	82.3499
UP_SEQ_FEATURE	domain:Collagen-like 9	2	0.321027	0.0944919	Q17RW2, Q8NFW1	623	3	19113	20.4526	1	0.836652	82.3499
UP_SEQ_FEATURE	repeat:Filamin 14	2	0.321027	0.0944919	O75369, Q5HY54	623	3	19113	20.4526	1	0.836652	82.3499
UP_SEQ_FEATURE	domain:Collagen-like 8	2	0.321027	0.0944919	Q17RW2, Q8NFW1	623	3	19113	20.4526	1	0.836652	82.3499
UP_SEQ_FEATURE	domain:Collagen-like 13	2	0.321027	0.0944919	Q17RW2, Q8NFW1	623	3	19113	20.4526	1	0.836652	82.3499
UP_SEQ_FEATURE	repeat:Filamin 2	2	0.321027	0.0944919	O75369, Q5HY54	623	3	19113	20.4526	1	0.836652	82.3499
UP_SEQ_FEATURE	repeat:Filamin 12	2	0.321027	0.0944919	O75369, Q5HY54	623	3	19113	20.4526	1	0.836652	82.3499
UP_SEQ_FEATURE	repeat:Filamin 3	2	0.321027	0.0944919	O75369, Q5HY54	623	3	19113	20.4526	1	0.836652	82.3499
UP_SEQ_FEATURE	region of interest:Self-association site, tail	2	0.321027	0.0944919	O75369, Q5HY54	623	3	19113	20.4526	1	0.836652	82.3499
UP_SEQ_FEATURE	domain:Collagen-like 15	2	0.321027	0.0944919	Q17RW2, Q8NFW1	623	3	19113	20.4526	1	0.836652	82.3499
UP_SEQ_FEATURE	repeat:PC 2	2	0.321027	0.0944919	Q13200, Q99460	623	3	19113	20.4526	1	0.836652	82.3499
UP_SEQ_FEATURE	repeat:Filamin 24	2	0.321027	0.0944919	O75369, Q5HY54	623	3	19113	20.4526	1	0.836652	82.3499
UP_SEQ_FEATURE	region of interest:Pyridoxal phosphate binding	2	0.321027	0.0944919	P35520, Q9Y617	623	3	19113	20.4526	1	0.836652	82.3499
UP_SEQ_FEATURE	binding site:Pyridoxal phosphate	2	0.321027	0.0944919	P35520, Q9Y617	623	3	19113	20.4526	1	0.836652	82.3499
UP_SEQ_FEATURE	repeat:Filamin 15	2	0.321027	0.0944919	O75369, Q5HY54	623	3	19113	20.4526	1	0.836652	82.3499
UP_SEQ_FEATURE	repeat:Filamin 10	2	0.321027	0.0944919	O75369, Q5HY54	623	3	19113	20.4526	1	0.836652	82.3499
UP_SEQ_FEATURE	repeat:Filamin 4	2	0.321027	0.0944919	O75369, Q5HY54	623	3	19113	20.4526	1	0.836652	82.3499
UP_SEQ_FEATURE	site:Involved in the association of subunits	2	0.321027	0.0944919	P11216, P06737	623	3	19113	20.4526	1	0.836652	82.3499
UP_SEQ_FEATURE	repeat:Filamin 21	2	0.321027	0.0944919	O75369, Q5HY54	623	3	19113	20.4526	1	0.836652	82.3499
UP_SEQ_FEATURE	repeat:Filamin 1	2	0.321027	0.0944919	O75369, Q5HY54	623	3	19113	20.4526	1	0.836652	82.3499
UP_SEQ_FEATURE	domain:Collagen-like 11	2	0.321027	0.0944919	Q17RW2, Q8NFW1	623	3	19113	20.4526	1	0.836652	82.3499
UP_SEQ_FEATURE	repeat:Filamin 8	2	0.321027	0.0944919	O75369, Q5HY54	623	3	19113	20.4526	1	0.836652	82.3499
SMART	SM00298:CHROMO	4	0.642055	0.0945686	Q12873, Q8TAQ2, Q9Y232, Q13185	311	32	9079	3.64912	1	0.575499	71.412
INTERPRO	IPR004161:Translation elongation factor EFTu/EF1A, domain 2	3	0.481541	0.0967482	P49411, Q15029, P41091	590	15	16659	5.64712	1	0.745787	80.6023
INTERPRO	IPR018181:Heat shock protein 70, conserved site	3	0.481541	0.0967482	P34932, P38646, Q92598	590	15	16659	5.64712	1	0.745787	80.6023
INTERPRO	IPR001753:Crotonase, core	3	0.481541	0.0967482	Q9Y232, P30084, P40939	590	15	16659	5.64712	1	0.745787	80.6023
UP_SEQ_FEATURE	compositionally biased region:Lys-rich	8	1.28411	0.0969217	P36578, Q9H0A0, Q4G0J3, O75592, Q9UPV0, Q8NI27, Q9UQ35, Q13127	623	120	19113	2.04526	1	0.842175	83.1594
KEGG_PATHWAY	hsa04520:Adherens junction	8	1.28411	0.0971173	P46940, P12814, P18206, P60953, Q09472, Q9UI47, O43707, Q8NEV1	261	77	5085	2.02418	0.999999	0.391478	70.0884
UP_SEQ_FEATURE	repeat:LRR 1	16	2.56822	0.0979903	Q7Z7L7, Q13045, Q9BTT0, Q6F5E8, Q5CZC0, Q14160, Q29RF7, P46060, Q7Z7A1, Q92688, Q8WXI7, P13489, Q8WXH0, Q8N1G4, Q86UT6	623	318	19113	1.5436	1	0.843252	83.5042
GOTERM_MF_FAT	GO:0032403~protein complex binding	13	2.08668	0.0984605	P52701, P27797, P31946, P02461, P12814, P31930, Q06124, O14654, O43707, P46821, P12004, Q13127, P63104	524	196	12983	1.64335	1	0.557916	79.3865
GOTERM_BP_FAT	GO:0046165~alcohol biosynthetic process	5	0.802568	0.0984805	P11498, P60174, P52209, P09104, P06737	543	44	13528	2.83107	1	0.638628	83.6852
KEGG_PATHWAY	hsa00410:beta-Alanine metabolism	4	0.642055	0.0993994	P30084, P40939, P30837, P05091	261	22	5085	3.54232	1	0.388634	70.9694
UP_SEQ_FEATURE	repeat:LRR 2	16	2.56822	0.0994003	Q7Z7L7, Q13045, Q9BTT0, Q6F5E8, Q5CZC0, Q14160, Q29RF7, P46060, Q7Z7A1, Q92688, Q8WXI7, P13489, Q8WXH0, Q8N1G4, Q86UT6	623	319	19113	1.53876	1	0.845358	83.949

## Sheet: Table S3
Gene ontology annotation clusters for proteins displaying >2-fold enrichment, >2 spectral counts (SCFA 6-enriched relative to control)
Annotation Cluster 1	Enrichment Score: 18.1003900040124
Category	Term	Count	%	PValue	Genes	List Total	Pop Hits	Pop Total	Fold Enrichment	Bonferroni	Benjamini	FDR
SP_PIR_KEYWORDS	atp-binding	125	20.0642	7.16036e-28	P00367, Q9H0A0, P52701, P31153, Q8IWY7, O15523, P49915, Q9Y230, P17858, Q96PY6, P38606, O00148, P53396, Q00839, Q92878, P49588, P17987, P41252, Q9Y2K3, P41250, P54577, O60282, Q2NKX8, P60842, P23921, O43776, P00558, Q9NSD9, Q8TD19, Q9NU22, O00763, P49591, P43686, P40227, P34932, Q9Y6G9, Q01813, P12956, Q9ULI0, Q58FG1, P54136, P16615, Q99832, P61221, P22392, P14625, P22102, P08243, P50990, P49736,…	623	1326	19235	2.91052	3.45845e-25	8.64613e-26	1.02611e-24
SP_PIR_KEYWORDS	nucleotide-binding	139	22.3114	2.28132e-25	P00367, Q9H0A0, P52701, Q9BVP2, P31153, Q8IWY7, O15523, P49915, Q9Y230, P17858, Q96PY6, P38606, O00148, P53396, Q00839, Q92878, P49411, P49588, P17987, P41252, Q9Y2K3, P54577, P41250, O60282, Q2NKX8, P60842, P23921, O43776, P00558, Q9NSD9, Q8TD19, Q9NU22, O00763, P49591, P43686, P40227, P34932, Q9Y6G9, Q01813, P60953, P12956, Q9ULI0, Q58FG1, P54136, P16615, Q99832, P61221, P22392, P14625, P22102,…	623	1686	19235	2.54543	1.10188e-22	1.83646e-23	3.26921e-22
GOTERM_MF_FAT	GO:0000166~nucleotide binding	180	28.8925	5.81888e-22	P00367, Q9H0A0, P52597, P52701, Q9BVP2, P31153, P07741, Q8IWY7, Q99714, O15523, Q9Y230, P49915, O43175, P23246, P17858, Q15717, Q96PY6, P56545, P05455, P38606, O00148, O43390, P53396, Q00839, O60506, Q13151, Q92878, P49588, P49411, P17987, P22626, O75821, Q9Y2K3, P41252, P54577, P41250, O60282, Q2NKX8, P60842, P55795, P23921, O43776, P00558, Q9NSD9, Q8TD19, O00763, Q9NU22, P49591, Q9H361, P43686,…	524	2245	12983	1.98655	4.39908e-19	4.39908e-19	8.86561e-19
GOTERM_MF_FAT	GO:0005524~ATP binding	130	20.8668	1.66748e-18	P00367, Q9H0A0, P52701, P31153, Q8IWY7, O15523, P49915, Q9Y230, P17858, Q96PY6, P38606, O00148, P53396, Q00839, Q92878, P49588, P17987, P41252, Q9Y2K3, P41250, P54577, O60282, Q2NKX8, P60842, P23921, O43776, P00558, Q9NSD9, Q8TD19, Q9NU22, O00763, P49591, P43686, A6NHR9, P40227, P34932, Q9Y6G9, Q01813, P12956, Q9ULI0, Q58FG1, P54136, P16615, Q99832, P61221, P22392, P14625, P22102, P08243, P50990,…	524	1477	12983	2.18075	1.26061e-15	6.30307e-16	2.54056e-15
GOTERM_MF_FAT	GO:0032559~adenyl ribonucleotide binding	131	21.0273	1.9042e-18	P00367, Q9H0A0, P52701, P31153, P07741, Q8IWY7, O15523, P49915, Q9Y230, P17858, Q96PY6, P38606, O00148, P53396, Q00839, Q92878, P49588, P17987, P41252, Q9Y2K3, P41250, P54577, O60282, Q2NKX8, P60842, P23921, O43776, P00558, Q9NSD9, Q8TD19, Q9NU22, O00763, P49591, P43686, A6NHR9, P40227, P34932, Q9Y6G9, Q01813, P12956, Q9ULI0, Q58FG1, P54136, P16615, Q99832, P61221, P22392, P14625, P22102, P08243,…	524	1497	12983	2.16817	1.43957e-15	4.79858e-16	2.90122e-15
GOTERM_MF_FAT	GO:0001882~nucleoside binding	136	21.8299	7.66278e-18	P00367, Q9H0A0, P52701, P31153, P07741, Q8IWY7, O15523, P49915, Q9Y230, P17858, Q96PY6, P38606, O00148, P53396, O43707, Q00839, Q92878, P49588, P17987, P41252, Q9Y2K3, P54577, P41250, O60282, Q2NKX8, P60842, P23921, O43776, P00558, Q9NSD9, Q8TD19, Q9NU22, O00763, P49591, P43686, A6NHR9, P40227, P34932, Q9Y6G9, Q01813, P12956, Q9ULI0, Q58FG1, P09622, P54136, P16615, Q99832, P61221, P22392, P14625,…	524	1612	12983	2.09034	5.79306e-15	1.44826e-15	1.1675e-14
GOTERM_MF_FAT	GO:0030554~adenyl nucleotide binding	134	21.5088	8.10365e-18	P00367, Q9H0A0, P52701, P31153, P07741, Q8IWY7, O15523, P49915, Q9Y230, P17858, Q96PY6, P38606, O00148, P53396, Q00839, Q92878, P49588, P17987, P41252, Q9Y2K3, P54577, P41250, O60282, Q2NKX8, P60842, P23921, O43776, P00558, Q9NSD9, Q8TD19, Q9NU22, O00763, P49591, P43686, A6NHR9, P40227, P34932, Q9Y6G9, Q01813, P12956, Q9ULI0, Q58FG1, P09622, P54136, P16615, Q99832, P61221, P22392, P14625, P22102,…	524	1577	12983	2.10531	6.12636e-15	1.22527e-15	1.23467e-14
GOTERM_MF_FAT	GO:0001883~purine nucleoside binding	134	21.5088	2.86089e-17	P00367, Q9H0A0, P52701, P31153, P07741, Q8IWY7, O15523, P49915, Q9Y230, P17858, Q96PY6, P38606, O00148, P53396, Q00839, Q92878, P49588, P17987, P41252, Q9Y2K3, P54577, P41250, O60282, Q2NKX8, P60842, P23921, O43776, P00558, Q9NSD9, Q8TD19, Q9NU22, O00763, P49591, P43686, A6NHR9, P40227, P34932, Q9Y6G9, Q01813, P12956, Q9ULI0, Q58FG1, P09622, P54136, P16615, Q99832, P61221, P22392, P14625, P22102,…	524	1601	12983	2.07375	2.16283e-14	3.60472e-15	4.35883e-14
GOTERM_MF_FAT	GO:0032555~purine ribonucleotide binding	144	23.114	5.53942e-16	P00367, Q9H0A0, P52701, Q9BVP2, P31153, P07741, Q8IWY7, O15523, P49915, Q9Y230, P17858, Q96PY6, P38606, O00148, P53396, Q00839, Q92878, P49411, P49588, P17987, P41252, Q9Y2K3, P54577, P41250, O60282, Q2NKX8, P60842, P23921, O43776, P00558, Q9NSD9, Q8TD19, Q9NU22, O00763, P49591, P43686, A6NHR9, P40227, P34932, Q9Y6G9, Q01813, P60953, P12956, Q96N67, Q9ULI0, Q58FG1, P54136, P16615, Q99832, P61221,…	524	1836	12983	1.94327	4.19664e-13	5.24025e-14	8.43769e-13
GOTERM_MF_FAT	GO:0032553~ribonucleotide binding	144	23.114	5.53942e-16	P00367, Q9H0A0, P52701, Q9BVP2, P31153, P07741, Q8IWY7, O15523, P49915, Q9Y230, P17858, Q96PY6, P38606, O00148, P53396, Q00839, Q92878, P49411, P49588, P17987, P41252, Q9Y2K3, P54577, P41250, O60282, Q2NKX8, P60842, P23921, O43776, P00558, Q9NSD9, Q8TD19, Q9NU22, O00763, P49591, P43686, A6NHR9, P40227, P34932, Q9Y6G9, Q01813, P60953, P12956, Q96N67, Q9ULI0, Q58FG1, P54136, P16615, Q99832, P61221,…	524	1836	12983	1.94327	4.19664e-13	5.24025e-14	8.43769e-13
GOTERM_MF_FAT	GO:0017076~purine nucleotide binding	147	23.5955	1.81253e-15	P00367, Q9H0A0, P52701, Q9BVP2, P31153, P07741, Q8IWY7, O15523, P49915, Q9Y230, P17858, Q96PY6, P38606, O00148, P53396, Q00839, Q92878, P49411, P49588, P17987, P41252, Q9Y2K3, P54577, P41250, O60282, Q2NKX8, P60842, P23921, O43776, P00558, Q9NSD9, Q8TD19, Q9NU22, O00763, P49591, P43686, A6NHR9, P40227, P34932, Q9Y6G9, Q01813, P60953, P12956, Q96N67, Q9ULI0, Q58FG1, P54136, P09622, P16615, Q99832,…	524	1918	12983	1.89895	1.34293e-12	1.49214e-13	2.70894e-12
UP_SEQ_FEATURE	nucleotide phosphate-binding region:ATP	78	12.5201	2.09318e-13	Q9H0A0, P52701, Q12873, Q3LXA3, P31153, O15523, Q8IWY7, P49915, Q9Y230, P17858, Q96PY6, P53350, Q08211, P38606, O00148, P53396, Q00839, Q9Y265, Q9UBT2, Q14566, Q92878, P22314, Q9Y2K3, Q9H2G2, P41250, O60282, P52732, P35579, Q2NKX8, P60842, P35580, Q7Z406, Q9UNY4, P00558, Q8TD19, O00763, Q9NU22, Q86UT6, P49591, P62191, P43686, Q9Y6G9, Q01813, Q96QE3, Q9ULI0, Q92841, P13535, P33176, P22102, Q5T7B8,…	623	962	19113	2.48748	4.81337e-10	6.01672e-11	3.65685e-10
Annotation Cluster 2	Enrichment Score: 17.232880183378203
Category	Term	Count	%	PValue	Genes	List Total	Pop Hits	Pop Total	Fold Enrichment	Bonferroni	Benjamini	FDR
GOTERM_CC_FAT	GO:0070013~intracellular organelle lumen	152	24.3981	3.92097e-22	Q16531, P46940, Q12906, P24752, P35520, P00367, Q9H0A0, P52597, Q9BVP2, Q9Y2L1, Q9Y230, Q9UQ35, P23246, P23528, P56545, Q09028, P05455, O43390, O43707, P62263, O60506, Q08J23, P49411, P22626, O60907, P41250, P04181, P55795, P42704, P07237, Q15459, P56537, O00410, Q9Y4W2, Q14974, Q92794, Q9BQ67, Q92797, P12956, Q8N163, P54136, P09874, P09622, Q2NL82, P12814, P51398, O00267, P14625, O75081, P49736,…	501	1779	12782	2.17986	1.7958e-19	8.97902e-20	5.57667e-19
GOTERM_CC_FAT	GO:0031974~membrane-enclosed lumen	154	24.7191	3.50018e-21	Q16531, P46940, Q12906, P24752, P35520, P00367, Q9H0A0, P52597, Q9BVP2, Q9Y2L1, Q9Y230, Q9UQ35, P23246, P23528, P56545, Q09028, P05455, O43390, O43707, P62263, O60506, Q08J23, P49411, P22626, O60907, P41250, P04181, P55795, P42704, P07237, Q15459, P56537, O00410, Q9Y4W2, Q14974, Q92794, Q9BQ67, P12956, Q92797, Q8N163, P54136, P09874, P09622, Q2NL82, P12814, P51398, O00267, P14625, O75081, P49736,…	501	1856	12782	2.11692	1.60308e-18	5.34361e-19	4.9782e-18
GOTERM_CC_FAT	GO:0043233~organelle lumen	152	24.3981	3.78961e-21	Q16531, P46940, Q12906, P24752, P35520, P00367, Q9H0A0, P52597, Q9BVP2, Q9Y2L1, Q9Y230, Q9UQ35, P23246, P23528, P56545, Q09028, P05455, O43390, O43707, P62263, O60506, Q08J23, P49411, P22626, O60907, P41250, P04181, P55795, P42704, P07237, Q15459, P56537, O00410, Q9Y4W2, Q14974, Q92794, Q9BQ67, Q92797, P12956, Q8N163, P54136, P09874, P09622, Q2NL82, P12814, P51398, O00267, P14625, O75081, P49736,…	501	1820	12782	2.13075	1.73564e-18	4.33911e-19	5.38985e-18
GOTERM_CC_FAT	GO:0031981~nuclear lumen	117	18.7801	1.3657e-14	P46940, Q12906, Q16531, P35520, P52597, Q9H0A0, Q9BVP2, Q9Y2L1, Q9Y230, Q9UQ35, P23528, P23246, P56545, Q09028, P05455, O43390, O43707, P62263, O60506, Q08J23, P22626, O60907, P55795, P42704, Q15459, P56537, O00410, Q9Y4W2, Q14974, Q92794, Q9BQ67, Q92797, P12956, P09874, P54136, Q2NL82, P12814, O00267, P49736, O75081, Q6P2Q9, Q9UHB9, P55072, Q4G0J3, Q8TAQ2, P51991, P35716, Q9UMN6, Q9Y262, Q13838,…	501	1450	12782	2.05863	6.25433e-12	8.93507e-13	1.94178e-11
GOTERM_CC_FAT	GO:0005654~nucleoplasm	76	12.199	9.64191e-11	Q16531, Q14573, P52597, Q12873, Q92769, Q9BVP2, P49643, Q9Y230, Q9UQ35, P31946, P31943, P62136, P56545, O14802, P53350, Q09028, Q9BWF3, O43390, O95163, P62826, Q9Y265, Q14566, O60506, P15880, P52294, Q10570, P22626, O60907, P06748, P55795, Q15020, P42704, Q9UNY4, P19338, Q5T6W2, Q9UJX3, Q14974, Q92794, P12956, Q92797, P14866, Q9UMS4, O75533, P09874, P51610, P78527, Q96D46, Q13547, O00267, P52292,…	501	882	12782	2.1984	4.41599e-08	4.01454e-09	1.37134e-07
Annotation Cluster 3	Enrichment Score: 14.294801786942315
Category	Term	Count	%	PValue	Genes	List Total	Pop Hits	Pop Total	Fold Enrichment	Bonferroni	Benjamini	FDR
GOTERM_CC_FAT	GO:0043228~non-membrane-bounded organelle	187	30.0161	2.45222e-19	Q12906, P46940, P35520, P36578, P55735, Q9H0A0, P52597, P52701, O60610, Q9Y2L1, Q9BVP2, Q9ULV4, P35527, O00291, Q8IWY7, P23528, Q4VCS5, Q09028, P13645, P05455, Q9BYB0, Q8WXH0, P47914, O43707, P62263, P23396, Q5HY54, Q08J23, Q9Y490, Q92878, P49411, P17987, Q5T4S7, P22626, P20930, Q9Y2K3, O60907, Q7Z7A1, Q16643, O60282, O75369, Q2NKX8, P55795, Q15149, P42704, Q9P2E9, Q9BV73, Q9Y232, P67775, Q02878,…	501	2596	12782	1.8378	1.12312e-16	2.24624e-17	3.48772e-16
GOTERM_CC_FAT	GO:0043232~intracellular non-membrane-bounded organelle	187	30.0161	2.45222e-19	Q12906, P46940, P35520, P36578, P55735, Q9H0A0, P52597, P52701, O60610, Q9Y2L1, Q9BVP2, Q9ULV4, P35527, O00291, Q8IWY7, P23528, Q4VCS5, Q09028, P13645, P05455, Q9BYB0, Q8WXH0, P47914, O43707, P62263, P23396, Q5HY54, Q08J23, Q9Y490, Q92878, P49411, P17987, Q5T4S7, P22626, P20930, Q9Y2K3, O60907, Q7Z7A1, Q16643, O60282, O75369, Q2NKX8, P55795, Q15149, P42704, Q9P2E9, Q9BV73, Q9Y232, P67775, Q02878,…	501	2596	12782	1.8378	1.12312e-16	2.24624e-17	3.48772e-16
GOTERM_CC_FAT	GO:0005856~cytoskeleton	89	14.2857	2.17008e-06	P46940, Q13045, Q5VYK3, O60610, O95425, Q9ULV4, P35527, Q13185, O00291, P30153, Q8IWY7, P31943, P23528, Q4VCS5, P53350, Q08211, P13645, O15078, Q9BYB0, Q8WXH0, O75592, O43707, Q5T1M5, Q9Y265, Q5TB80, Q9Y266, O95359, Q5HY54, Q7Z494, Q9Y490, Q5T4S7, P17987, P20930, Q8WUM4, Q9Y2K3, O60907, Q7Z7A1, O60282, Q16643, O75369, P52732, P49454, P35579, P06748, Q3KQU3, P35580, P55795, Q15149, P42704, Q7Z406,…	501	1381	12782	1.64421	0.000993402	3.9755e-05	0.00308639
Annotation Cluster 4	Enrichment Score: 10.845585872389067
Category	Term	Count	%	PValue	Genes	List Total	Pop Hits	Pop Total	Fold Enrichment	Bonferroni	Benjamini	FDR
GOTERM_CC_FAT	GO:0030529~ribonucleoprotein complex	69	11.0754	2.8087e-19	Q12906, Q15185, P36578, P52597, Q5CZC0, Q15029, Q9UQ35, P31943, P32969, Q9BWF3, Q08211, P05455, P62424, O43390, Q9UQ80, P47914, P10155, O43707, Q00839, P62263, P23396, O60506, P15880, Q13151, Q9Y3F4, O94906, P22626, Q9BZZ5, P06748, O76094, P55795, Q9P2E9, Q9UNY4, Q02878, Q15393, P19338, Q15366, Q15459, Q15365, Q5T6W2, P46777, P14866, Q9UMS4, P27797, O75533, Q7KZF4, P51398, Q6P2Q9, P38919, Q9UHB9,…	501	515	12782	3.41824	1.28638e-16	2.14397e-17	3.99472e-16
SP_PIR_KEYWORDS	rna-binding	62	9.95185	9.89143e-18	Q12906, P52597, Q9Y2L1, O15523, Q9UQ35, P31943, P23246, Q15717, Q9BWF3, Q08211, P05455, O43390, Q9UQ80, Q9HAV4, P10155, Q00839, P23396, O60506, Q13151, Q08J23, Q10570, P49588, P22626, O75821, P54577, P06748, P60842, Q15020, P55795, P42704, Q8NI27, P19338, Q15366, P63241, Q15365, Q5T6W2, Q9H361, P56192, P46777, P14866, Q92841, O43432, Q6P2Q9, O00425, P38919, Q9UHB9, A6NLN1, P62701, P46781, Q9NR30,…	623	540	19235	3.54488	4.77756e-15	6.82509e-16	1.41748e-14
GOTERM_MF_FAT	GO:0003723~RNA binding	80	12.8411	9.73074e-17	Q12906, P36578, P52597, Q9Y2L1, O15523, Q9UQ35, P31943, P23246, P32969, Q15717, Q9BWF3, Q08211, P05455, P62424, O43390, Q9UQ80, P47914, Q9HAV4, P10155, Q00839, P23396, P62263, O60506, P15880, Q13151, Q08J23, Q10570, P49588, P22626, O75821, P54577, P06748, P60842, O76094, P55795, Q15020, P42704, Q8N1G4, Q9NSD9, Q8NI27, Q02878, Q12996, P49591, P19338, Q15366, Q15459, Q15365, P63241, Q5T6W2, Q9H361,…	524	718	12983	2.76064	8.39329e-14	1.19904e-14	1.66533e-13
GOTERM_BP_FAT	GO:0000375~RNA splicing, via transesterification reactions	29	4.6549	1.22751e-11	O14744, P52597, P14866, O75533, Q15029, P31943, Q08211, O43390, O00148, Q6P2Q9, Q00839, A6NLN1, Q13151, Q10570, O94906, P22626, P51991, O75643, Q13838, O43172, P55795, Q92499, Q12996, Q15393, P61326, Q15459, Q15366, Q15365, Q5T6W2	543	153	13528	4.72216	2.84413e-08	1.42207e-08	2.14673e-08
GOTERM_BP_FAT	GO:0000398~nuclear mRNA splicing, via spliceosome	29	4.6549	1.22751e-11	O14744, P52597, P14866, O75533, Q15029, P31943, Q08211, O43390, O00148, Q6P2Q9, Q00839, A6NLN1, Q13151, Q10570, O94906, P22626, P51991, O75643, Q13838, O43172, P55795, Q92499, Q12996, Q15393, P61326, Q15459, Q15366, Q15365, Q5T6W2	543	153	13528	4.72216	2.84413e-08	1.42207e-08	2.14673e-08
GOTERM_BP_FAT	GO:0000377~RNA splicing, via transesterification reactions with bulged adenosine as nucleophile	29	4.6549	1.22751e-11	O14744, P52597, P14866, O75533, Q15029, P31943, Q08211, O43390, O00148, Q6P2Q9, Q00839, A6NLN1, Q13151, Q10570, O94906, P22626, P51991, O75643, Q13838, O43172, P55795, Q92499, Q12996, Q15393, P61326, Q15459, Q15366, Q15365, Q5T6W2	543	153	13528	4.72216	2.84413e-08	1.42207e-08	2.14673e-08
GOTERM_BP_FAT	GO:0008380~RNA splicing	40	6.42055	1.39996e-11	O14744, P52597, P14866, Q9UMS4, O75533, P30153, Q15029, Q9UQ35, P31943, P23246, Q9BWF3, Q08211, O43390, O00148, Q6P2Q9, P38919, Q00839, A6NLN1, O60506, Q13151, Q10570, Q9Y3F4, O94906, O75643, P22626, P51991, Q13838, O43172, P55795, Q92499, Q9UNY4, P67775, Q8NI27, Q12996, Q15393, P61326, Q15459, Q15366, Q15365, Q5T6W2	543	284	13528	3.50894	3.2437e-08	1.08123e-08	2.44832e-08
SP_PIR_KEYWORDS	Spliceosome	23	3.69181	3.67971e-11	P52597, Q9Y3F4, O94906, P51991, P22626, O75643, O75533, Q9UMS4, Q15029, Q9UQ35, P31943, Q13838, O43172, Q9UNY4, O43390, Q15393, Q6P2Q9, P38919, Q00839, P61326, Q15459, O60506, Q5T6W2	623	120	19235	5.91767	1.7773e-08	1.61573e-09	5.27316e-08
SP_PIR_KEYWORDS	mrna splicing	29	4.6549	1.92912e-10	P52597, O75533, Q9UMS4, Q15029, Q9UQ35, P31943, P23246, Q9BWF3, O43390, O00148, Q6P2Q9, P38919, Q00839, A6NLN1, O60506, Q9Y3F4, O94906, P22626, P51991, O75643, Q13838, O43172, Q9UNY4, Q8NI27, P51816, Q15393, P61326, Q15459, Q5T6W2	623	209	19235	4.28406	9.31763e-08	7.76469e-09	2.76449e-07
GOTERM_BP_FAT	GO:0016071~mRNA metabolic process	44	7.0626	3.0188e-10	Q9H361, O14744, P52597, P14866, Q9UMS4, O75533, Q15029, Q9UQ35, P31943, P23246, Q15717, Q9BWF3, Q08211, P05455, P13489, O00148, O43390, Q6P2Q9, P38919, Q00839, Q92900, A6NLN1, O60506, Q13151, Q10570, Q9Y3F4, O94906, O75643, P22626, P51991, Q9NZI8, O43172, Q13838, P55795, Q92499, Q9UNY4, Q8NI27, Q12996, Q15393, P61326, Q15459, Q15366, Q15365, Q5T6W2	543	370	13528	2.96268	6.99456e-07	9.99223e-08	5.27943e-07
SP_PIR_KEYWORDS	mrna processing	32	5.13644	4.04301e-10	P52597, Q92797, Q9UMS4, O75533, Q15029, Q9UQ35, P31943, P23246, Q9BWF3, O43390, O00148, Q6P2Q9, P38919, Q00839, A6NLN1, O60506, Q10570, Q9Y3F4, O94906, P22626, P51991, O75643, Q13838, O43172, Q9UNY4, Q8NI27, P51816, Q12996, Q15393, P61326, Q15459, Q5T6W2	623	260	19235	3.79998	1.95277e-07	1.39484e-08	5.79378e-07
GOTERM_CC_FAT	GO:0005681~spliceosome	24	3.85233	1.44256e-09	P52597, Q9Y3F4, O94906, P51991, P22626, O75643, Q9BZZ5, O75533, Q9UMS4, Q15029, Q9UQ35, P31943, Q13838, O43172, Q9UNY4, O43390, Q15393, Q6P2Q9, P38919, Q00839, P61326, Q15459, O60506, Q5T6W2	501	132	12782	4.63872	6.6069e-07	5.50575e-08	2.0517e-06
GOTERM_BP_FAT	GO:0006396~RNA processing	53	8.50722	5.64601e-09	O14744, P52597, Q9Y2L1, P30153, Q99714, Q15029, Q9UQ35, P31943, P23246, Q08211, Q9BWF3, P05455, O00148, O43390, Q9UQ80, Q00839, P62263, O60506, Q13151, Q08J23, Q10570, Q9Y3F4, O94906, P49588, P22626, Q15020, P55795, Q9UNY4, P67775, Q8NI27, Q12996, Q15393, P49591, Q15459, Q15366, Q15365, Q5T6W2, P46777, P14866, Q9UMS4, O75533, Q92841, Q6P2Q9, P38919, A6NLN1, Q4G0J3, P51991, O75643, O43172, Q13838,…	543	547	13528	2.41392	1.30817e-05	8.7212e-07	9.87403e-06
GOTERM_BP_FAT	GO:0006397~mRNA processing	38	6.09952	6.86926e-09	O14744, P52597, P14866, Q9UMS4, O75533, Q15029, Q9UQ35, P31943, P23246, Q9BWF3, Q08211, O43390, O00148, Q6P2Q9, P38919, Q00839, A6NLN1, O60506, Q13151, Q10570, Q9Y3F4, O94906, O75643, P22626, P51991, Q13838, O43172, P55795, Q92499, Q9UNY4, Q8NI27, Q12996, Q15393, P61326, Q15459, Q15366, Q15365, Q5T6W2	543	321	13528	2.94926	1.59159e-05	9.94754e-07	1.20133e-05
KEGG_PATHWAY	hsa03040:Spliceosome	17	2.72873	0.000610405	O94906, P51991, O75643, Q9UMS4, O75533, Q15029, Q13838, O43172, Q8NI27, Q15393, Q6P2Q9, P38919, Q00839, P61326, Q15459, Q15365, Q5T6W2	261	126	5085	2.62863	0.0824914	0.00857238	0.718741
Annotation Cluster 5	Enrichment Score: 8.873832535615254
Category	Term	Count	%	PValue	Genes	List Total	Pop Hits	Pop Total	Fold Enrichment	Bonferroni	Benjamini	FDR
SP_PIR_KEYWORDS	protein biosynthesis	46	7.38363	1.30082e-26	P56192, P46777, P14868, P47897, P54136, P32969, O43432, P62424, P47914, O00303, P38919, P62263, P23396, P62701, P46781, P15880, P46783, P05386, P49588, P49411, O75821, P26639, P05388, P41252, Q14152, P54577, P41250, P60842, Q6PI48, Q9Y262, P26641, Q13347, O43776, P07814, O15371, P12081, Q9P2J5, Q9NSD9, Q02878, P49591, Q99613, P26373, P63241, P56537, P41091	623	188	19235	7.55447	6.28297e-24	1.25659e-24	1.86413e-23
SP_PIR_KEYWORDS	Aminoacyl-tRNA synthetase	16	2.56822	4.58472e-13	P56192, P49588, P14868, P26639, P47897, P41252, P54577, P41250, P54136, Q6PI48, O43776, P07814, P12081, Q9P2J5, Q9NSD9, P49591	623	39	19235	12.6666	2.21466e-10	2.46073e-11	6.57074e-10
GOTERM_MF_FAT	GO:0004812~aminoacyl-tRNA ligase activity	17	2.72873	1.81195e-11	P56192, P49588, P14868, P26639, P47897, P41252, P41250, P54577, P54136, Q6PI48, O43776, P07814, Q8N1G4, P12081, Q9P2J5, Q9NSD9, P49591	524	47	12983	8.96179	1.36983e-08	1.36983e-09	2.76068e-08
GOTERM_MF_FAT	GO:0016876~ligase activity, forming aminoacyl-tRNA and related compounds	17	2.72873	1.81195e-11	P56192, P49588, P14868, P26639, P47897, P41252, P41250, P54577, P54136, Q6PI48, O43776, P07814, Q8N1G4, P12081, Q9P2J5, Q9NSD9, P49591	524	47	12983	8.96179	1.36983e-08	1.36983e-09	2.76068e-08
GOTERM_MF_FAT	GO:0016875~ligase activity, forming carbon-oxygen bonds	17	2.72873	1.81195e-11	P56192, P49588, P14868, P26639, P47897, P41252, P41250, P54577, P54136, Q6PI48, O43776, P07814, Q8N1G4, P12081, Q9P2J5, Q9NSD9, P49591	524	47	12983	8.96179	1.36983e-08	1.36983e-09	2.76068e-08
GOTERM_BP_FAT	GO:0006418~tRNA aminoacylation for protein translation	16	2.56822	1.473e-10	P56192, P49588, P14868, P26639, P47897, P41252, P54577, P41250, P54136, Q6PI48, O43776, P07814, P12081, Q9P2J5, Q9NSD9, P49591	543	46	13528	8.66555	3.41295e-07	6.82591e-08	2.57607e-07
GOTERM_BP_FAT	GO:0043039~tRNA aminoacylation	16	2.56822	1.473e-10	P56192, P49588, P14868, P26639, P47897, P41252, P54577, P41250, P54136, Q6PI48, O43776, P07814, P12081, Q9P2J5, Q9NSD9, P49591	543	46	13528	8.66555	3.41295e-07	6.82591e-08	2.57607e-07
GOTERM_BP_FAT	GO:0043038~amino acid activation	16	2.56822	1.473e-10	P56192, P49588, P14868, P26639, P47897, P41252, P54577, P41250, P54136, Q6PI48, O43776, P07814, P12081, Q9P2J5, Q9NSD9, P49591	543	46	13528	8.66555	3.41295e-07	6.82591e-08	2.57607e-07
SP_PIR_KEYWORDS	ligase	35	5.61798	3.51274e-10	P17812, Q9C0C9, P56192, P14868, P47897, P30520, O95573, P49915, P54136, Q96RQ3, P05165, Q9HCC0, P22102, P08243, O75592, Q9UBT2, P11498, P49588, Q5T4S7, P22314, P26639, P41252, Q15751, P54577, P41250, Q7Z6Z7, Q6PI48, Q13085, O43776, P07814, P12081, Q9P2J5, Q9NSD9, O00763, P49591	623	305	19235	3.54301	1.69665e-07	1.30512e-08	5.03389e-07
KEGG_PATHWAY	hsa00970:Aminoacyl-tRNA biosynthesis	16	2.56822	5.48715e-10	P56192, P49588, P14868, P26639, P47897, P41252, P54577, P41250, P54136, Q6PI48, O43776, P07814, P12081, Q9P2J5, Q9NSD9, P49591	261	41	5085	7.60303	7.73688e-08	7.73688e-08	6.48237e-07
INTERPRO	IPR006195:Aminoacyl-tRNA synthetase, class II, conserved region	8	1.28411	9.51782e-07	O43776, P07814, P14868, P26639, P12081, P41250, P49591, Q6PI48	590	17	16659	13.2873	0.00111392	0.000185739	0.00153402
GOTERM_BP_FAT	GO:0006399~tRNA metabolic process	19	3.04976	1.00776e-06	P56192, Q08J23, P49588, P14868, P26639, P47897, P41252, Q99714, P41250, P54577, P54136, Q6PI48, O43776, P07814, P05455, P12081, Q9P2J5, Q9NSD9, P49591	543	118	13528	4.01149	0.00233227	6.67118e-05	0.00176242
UP_SEQ_FEATURE	short sequence motif:"HIGH" region	7	1.1236	1.5406e-05	P56192, P07814, Q9P2J5, P47897, P41252, P54577, P54136	623	18	19113	11.9307	0.0348136	0.00131151	0.0269166
GOTERM_BP_FAT	GO:0034660~ncRNA metabolic process	24	3.85233	5.12667e-05	P56192, Q08J23, P46777, P14868, Q9Y2L1, P49588, P26639, P47897, P41252, Q99714, P41250, P54577, P54136, Q6PI48, O43776, P07814, P05455, P12081, Q9P2J5, Q9NSD9, Q9UQ80, P38919, P49591, P62263	543	230	13528	2.59966	0.112004	0.00208183	0.08962
INTERPRO	IPR014729:Rossmann-like alpha/beta/alpha sandwich fold	9	1.44462	6.58196e-05	P56192, P08243, Q9P2J5, P47897, P41252, P13804, P49915, P54577, P54136	590	40	16659	6.35301	0.0741817	0.00349738	0.106032
UP_SEQ_FEATURE	short sequence motif:"KMSKS" region	6	0.963082	0.000116415	P56192, P07814, Q9P2J5, P47897, P41252, P54577	623	16	19113	11.5046	0.234917	0.00741049	0.203226
INTERPRO	IPR001412:Aminoacyl-tRNA synthetase, class I, conserved site	7	1.1236	0.00110023	P56192, P07814, Q9P2J5, P47897, P41252, P54577, P54136	590	34	16659	5.81321	0.724475	0.0351742	1.75862
Annotation Cluster 6	Enrichment Score: 8.816683178051777
Category	Term	Count	%	PValue	Genes	List Total	Pop Hits	Pop Total	Fold Enrichment	Bonferroni	Benjamini	FDR
INTERPRO	IPR011989:Armadillo-like helical	34	5.45746	8.75943e-20	O95996, Q5VYK3, Q14974, P55060, P30154, O75533, P30153, Q99460, O14617, Q86VP6, O95373, Q9Y678, P52292, Q86Y56, Q9HAV4, Q9H3U1, O00629, Q96T76, Q7Z7L7, P52294, Q92973, Q92616, Q8TEX9, Q14008, Q96P70, O60684, Q9UBF2, O14980, Q10567, O95782, Q8TCG1, O60518, P53618, O00410	590	128	16659	7.50008	1.02573e-16	1.02573e-16	1.4118e-16
UP_SEQ_FEATURE	repeat:HEAT 6	18	2.88925	3.27804e-18	Q9BPX3, Q96T76, Q5VYK3, O75155, Q14974, Q92973, Q92616, O75533, P30154, Q8TEX9, P30153, Q14008, Q86VP6, Q9UBF2, O14980, Q86Y56, O60518, O00410	623	30	19113	18.4074	7.5395e-15	7.5395e-15	5.72797e-15
UP_SEQ_FEATURE	repeat:HEAT 5	19	3.04976	3.46223e-18	Q9BPX3, Q96T76, Q5VYK3, O75155, Q14974, Q92973, Q92616, O75533, P30154, Q8TEX9, P30153, Q14008, Q86VP6, O43432, Q9UBF2, O14980, Q86Y56, O60518, O00410	623	35	19113	16.6543	7.96312e-15	3.98156e-15	6.0498e-15
UP_SEQ_FEATURE	repeat:HEAT 4	20	3.21027	1.54427e-17	Q9BPX3, Q96T76, Q5VYK3, O75155, Q14974, Q92973, Q92616, O75533, P30154, Q8TEX9, P30153, Q14008, Q86VP6, O43432, Q9Y678, Q9UBF2, O14980, Q86Y56, O60518, O00410	623	43	19113	14.2693	3.55182e-14	1.18394e-14	2.69842e-14
UP_SEQ_FEATURE	repeat:HEAT 3	20	3.21027	4.68424e-16	Q9BPX3, Q96T76, Q5VYK3, O75155, Q14974, Q92973, Q92616, O75533, P30154, Q8TEX9, P30153, Q14008, Q86VP6, O43432, Q9Y678, Q9UBF2, O14980, Q86Y56, O60518, O00410	623	50	19113	12.2716	1.02141e-12	2.55351e-13	7.77156e-13
UP_SEQ_FEATURE	repeat:HEAT 1	21	3.37079	7.19052e-16	Q9BPX3, Q96T76, Q5VYK3, O75155, Q14974, Q92973, Q92616, O75533, P30154, Q8TEX9, P30153, Q14008, P78527, Q86VP6, O43432, Q9Y678, Q9UBF2, O14980, Q86Y56, O60518, O00410	623	58	19113	11.1079	1.53211e-12	3.06422e-13	1.16573e-12
UP_SEQ_FEATURE	repeat:HEAT 2	21	3.37079	7.19052e-16	Q9BPX3, Q96T76, Q5VYK3, O75155, Q14974, Q92973, Q92616, O75533, P30154, Q8TEX9, P30153, Q14008, P78527, Q86VP6, O43432, Q9Y678, Q9UBF2, O14980, Q86Y56, O60518, O00410	623	58	19113	11.1079	1.53211e-12	3.06422e-13	1.16573e-12
UP_SEQ_FEATURE	repeat:HEAT 7	15	2.4077	1.83876e-15	Q9BPX3, Q96T76, Q5VYK3, O75155, Q14974, Q92973, Q92616, P30154, O75533, P30153, Q14008, Q86VP6, O14980, Q86Y56, O60518	623	24	19113	19.1744	4.34097e-12	7.23532e-13	3.29736e-12
UP_SEQ_FEATURE	repeat:HEAT 8	13	2.08668	5.19752e-14	Q9BPX3, Q5VYK3, O75155, Q14974, Q92973, Q92616, P30154, O75533, P30153, Q14008, Q86VP6, O14980, Q86Y56	623	19	19113	20.9909	1.19504e-10	1.7072e-11	9.0794e-11
UP_SEQ_FEATURE	repeat:HEAT 10	11	1.76565	3.21701e-12	Q9BPX3, Q5VYK3, O75155, O14980, Q92616, Q86Y56, O75533, P30154, P30153, Q14008, Q86VP6	623	15	19113	22.4979	7.39906e-09	8.22118e-10	5.62127e-09
UP_SEQ_FEATURE	repeat:HEAT 9	11	1.76565	3.21701e-12	Q9BPX3, Q5VYK3, O75155, O14980, Q92616, Q86Y56, O75533, P30154, P30153, Q14008, Q86VP6	623	15	19113	22.4979	7.39906e-09	8.22118e-10	5.62127e-09
INTERPRO	IPR000357:HEAT	18	2.88925	3.28292e-12	Q96T76, Q5VYK3, O75155, Q14974, Q92973, Q92797, Q92616, Q29RF7, O75533, P30154, Q8TEX9, P30153, Q14008, P78527, Q86VP6, Q86Y56, O60518, O00410	590	55	16659	9.24074	3.84431e-09	1.92216e-09	5.29125e-09
UP_SEQ_FEATURE	repeat:HEAT 11	7	1.1236	4.66084e-07	Q5VYK3, O75155, Q92616, O75533, P30154, P30153, Q86VP6	623	11	19113	19.523	0.00107142	6.30565e-05	0.00081442
UP_SEQ_FEATURE	repeat:HEAT 15	6	0.963082	7.14614e-07	Q5VYK3, O75155, Q92616, P30154, P30153, Q86VP6	623	7	19113	26.2963	0.00164226	9.13076e-05	0.00124869
UP_SEQ_FEATURE	repeat:HEAT 14	6	0.963082	4.06046e-06	Q5VYK3, O75155, Q92616, P30154, P30153, Q86VP6	623	9	19113	20.4526	0.0092956	0.000444619	0.0070949
UP_SEQ_FEATURE	repeat:HEAT 12	6	0.963082	7.90305e-06	Q5VYK3, O75155, Q92616, P30154, P30153, Q86VP6	623	10	19113	18.4074	0.0180129	0.000789996	0.0138087
UP_SEQ_FEATURE	repeat:HEAT 13	6	0.963082	7.90305e-06	Q5VYK3, O75155, Q92616, P30154, P30153, Q86VP6	623	10	19113	18.4074	0.0180129	0.000789996	0.0138087
UP_SEQ_FEATURE	repeat:HEAT 19	4	0.642055	0.000133886	Q5VYK3, O75155, Q92616, Q86VP6	623	4	19113	30.679	0.265054	0.00828864	0.233691
UP_SEQ_FEATURE	repeat:HEAT 21	4	0.642055	0.000133886	Q5VYK3, O75155, Q92616, Q86VP6	623	4	19113	30.679	0.265054	0.00828864	0.233691
UP_SEQ_FEATURE	repeat:HEAT 20	4	0.642055	0.000133886	Q5VYK3, O75155, Q92616, Q86VP6	623	4	19113	30.679	0.265054	0.00828864	0.233691
UP_SEQ_FEATURE	repeat:HEAT 16	4	0.642055	0.000133886	Q5VYK3, O75155, Q92616, Q86VP6	623	4	19113	30.679	0.265054	0.00828864	0.233691
UP_SEQ_FEATURE	repeat:HEAT 18	4	0.642055	0.000133886	Q5VYK3, O75155, Q92616, Q86VP6	623	4	19113	30.679	0.265054	0.00828864	0.233691
UP_SEQ_FEATURE	repeat:HEAT 17	4	0.642055	0.000133886	Q5VYK3, O75155, Q92616, Q86VP6	623	4	19113	30.679	0.265054	0.00828864	0.233691
UP_SEQ_FEATURE	repeat:HEAT 24	4	0.642055	0.000133886	Q5VYK3, O75155, Q92616, Q86VP6	623	4	19113	30.679	0.265054	0.00828864	0.233691
UP_SEQ_FEATURE	repeat:HEAT 22	4	0.642055	0.000133886	Q5VYK3, O75155, Q92616, Q86VP6	623	4	19113	30.679	0.265054	0.00828864	0.233691
UP_SEQ_FEATURE	repeat:HEAT 23	4	0.642055	0.000133886	Q5VYK3, O75155, Q92616, Q86VP6	623	4	19113	30.679	0.265054	0.00828864	0.233691
UP_SEQ_FEATURE	repeat:HEAT 26	3	0.481541	0.00310365	Q5VYK3, O75155, Q86VP6	623	3	19113	30.679	0.999215	0.108914	5.28678
UP_SEQ_FEATURE	repeat:HEAT 25	3	0.481541	0.00310365	Q5VYK3, O75155, Q86VP6	623	3	19113	30.679	0.999215	0.108914	5.28678
Annotation Cluster 7	Enrichment Score: 8.398936648301797
Category	Term	Count	%	PValue	Genes	List Total	Pop Hits	Pop Total	Fold Enrichment	Bonferroni	Benjamini	FDR
SP_PIR_KEYWORDS	isopeptide bond	35	5.61798	1.15246e-09	P35520, Q14974, P52597, O60610, Q96KK5, P16615, Q13547, Q09028, P22392, P49792, P50990, P47914, O75081, Q13618, P62826, O43707, Q9NR48, Q5TB80, P12004, P23396, O60506, O75643, P26639, P46060, P06748, Q8N0X7, Q3KQU3, P15531, Q13347, P62937, P51665, Q99798, P13797, P62191, Q5T6W2, Q9Y623	623	319	19235	3.38752	5.56639e-07	3.47899e-08	1.65152e-06
UP_SEQ_FEATURE	cross-link:Glycyl lysine isopeptide (Lys-Gly) (interchain with G-Cter in ubiquitin)	27	4.33387	1.69836e-09	Q14974, O60610, Q96KK5, P16615, Q09028, P22392, P50990, P62826, O75081, P47914, O43707, Q9NR48, Q5TB80, P12004, P23396, O60506, P26639, Q8N0X7, P15531, Q3KQU3, P62937, Q13347, P51665, Q99798, P13797, P62191, Q5T6W2, Q9Y623	623	199	19113	4.16247	3.90622e-06	3.25519e-07	2.96767e-06
SP_PIR_KEYWORDS	ubl conjugation	47	7.54414	3.24738e-08	Q16531, P35520, O75155, P52597, Q14974, O60610, Q9Y295, P26358, Q14160, Q96KK5, P16615, Q13547, Q09028, P22392, P49792, P50990, P47914, O75081, Q13618, P62826, Q6NT89, O43707, Q9NR48, P23396, Q5TB80, P12004, O60506, Q16543, Q09472, O75643, Q9UJY4, P26639, P46060, Q93009, P06748, Q8N0X7, Q3KQU3, P15531, Q13347, P62937, P51665, P78347, Q99798, P13797, P62191, Q5T6W2, Q9Y623	623	588	19235	2.46788	1.56847e-05	7.84242e-07	4.65361e-05
Annotation Cluster 8	Enrichment Score: 7.943481397333605
Category	Term	Count	%	PValue	Genes	List Total	Pop Hits	Pop Total	Fold Enrichment	Bonferroni	Benjamini	FDR
GOTERM_MF_FAT	GO:0051082~unfolded protein binding	23	3.69181	9.05659e-10	Q15185, O00170, Q16543, P31689, P40227, P27824, P17987, P27797, Q58FG1, Q9Y230, P50454, P38646, P06748, Q99832, P53621, P62937, Q9NYU2, P14625, Q99733, P10809, Q9NU22, P50990, P50991	524	115	12983	4.95534	6.84678e-07	6.22435e-08	1.37986e-06
GOTERM_BP_FAT	GO:0006457~protein folding	26	4.17335	3.92334e-08	O00170, P31689, P40227, Q02790, P27797, Q58FG1, Q9Y230, Q99832, P53621, P14625, P49792, P50990, O95433, P50991, Q5T1M5, P27824, P49588, P17987, Q86VQ3, Q08752, P38646, P62937, Q15084, Q99615, Q9NYU2, P10809	543	177	13528	3.6596	9.08997e-05	4.32874e-06	6.86134e-05
SP_PIR_KEYWORDS	Chaperone	22	3.5313	4.15848e-08	Q15185, Q16543, P31689, P40227, P27824, P17987, P27797, Q58FG1, P50454, P38646, P06748, Q99832, P61221, Q99615, P14625, P10809, Q9NU22, P07237, P50990, P50991, O95433, Q9H3U1	623	158	19235	4.29902	2.00853e-05	9.56451e-07	5.95926e-05
Annotation Cluster 9	Enrichment Score: 7.236067605241558
Category	Term	Count	%	PValue	Genes	List Total	Pop Hits	Pop Total	Fold Enrichment	Bonferroni	Benjamini	FDR
GOTERM_CC_FAT	GO:0005643~nuclear pore	23	3.69181	1.68367e-13	O00629, P52294, P55735, Q8WUM0, Q14974, Q92973, Q9Y6D9, P55060, Q9UIA9, P46060, Q8TEX9, Q96P70, Q5SRE5, O60684, O95373, P49792, O14980, P52292, Q8N1F7, P62826, P35658, P63241, O00410	501	79	12782	7.42783	7.71367e-11	9.64206e-12	2.39542e-10
GOTERM_CC_FAT	GO:0005635~nuclear envelope	35	5.61798	6.86472e-13	Q8IVL0, P55735, Q14573, Q14974, P55060, Q9UIA9, Q13185, P37802, P09874, O95373, P49792, Q8WXH0, P52292, P42166, Q8N1F7, P62826, P12004, O00629, P52294, Q8WUM0, Q92973, Q9Y6D9, P46060, Q8TEX9, Q96P70, P49454, Q5SRE5, O60684, P42704, O14980, P43243, P35658, P63241, P56537, O00410	501	205	12782	4.35587	3.14395e-10	3.49327e-11	9.76319e-10
GOTERM_CC_FAT	GO:0046930~pore complex	24	3.85233	1.21204e-12	O00629, P52294, P55735, Q8WUM0, Q14974, Q92973, Q9Y6D9, P55060, Q9UIA9, P46060, Q8TEX9, Q96P70, Q5SRE5, O60684, O95373, P49792, O14980, P52292, Q8N1F7, P62826, P35658, P63241, O00410, Q9Y277	501	95	12782	6.44538	5.5511e-10	5.5511e-11	1.72383e-09
GOTERM_BP_FAT	GO:0006886~intracellular protein transport	45	7.22311	1.25015e-10	O00170, P55735, Q14974, P55060, Q9UIA9, P27797, P35606, O14617, P31946, P61981, P53621, P27348, O95373, Q9Y678, P49792, P52292, P62826, Q9HAV4, Q00610, P55072, P12004, P63104, O00629, Q16543, P52294, Q92973, Q9UJY4, Q8TEX9, Q7Z3T8, Q96P70, P38646, P06748, O76094, O60684, Q9UBF2, P62258, O14980, Q04917, P48444, Q10567, O95782, P35658, P63241, O00410, P53618	543	374	13528	2.99761	2.8966e-07	7.24151e-08	2.18633e-07
GOTERM_BP_FAT	GO:0034613~cellular protein localization	47	7.54414	2.48252e-10	O00170, P55735, Q14974, P60953, P55060, Q9UIA9, P27797, P35606, O14617, P31946, P61981, P53621, P27348, O95373, Q9Y678, P49792, P52292, P62826, Q9HAV4, Q00610, P55072, P12004, Q5HY54, P63104, O00629, Q16543, P52294, Q92973, Q9UJY4, Q8TEX9, Q7Z3T8, Q96P70, P38646, P06748, O76094, O60684, Q9UBF2, P62258, O14980, Q04917, P48444, Q10567, O95782, P35658, P63241, O00410, P53618	543	411	13528	2.84898	5.75199e-07	9.58665e-08	4.34155e-07
GOTERM_BP_FAT	GO:0070727~cellular macromolecule localization	47	7.54414	3.17124e-10	O00170, P55735, Q14974, P60953, P55060, Q9UIA9, P27797, P35606, O14617, P31946, P61981, P53621, P27348, O95373, Q9Y678, P49792, P52292, P62826, Q9HAV4, Q00610, P55072, P12004, Q5HY54, P63104, O00629, Q16543, P52294, Q92973, Q9UJY4, Q8TEX9, Q7Z3T8, Q96P70, P38646, P06748, O76094, O60684, Q9UBF2, P62258, O14980, Q04917, P48444, Q10567, O95782, P35658, P63241, O00410, P53618	543	414	13528	2.82834	7.34777e-07	9.18472e-08	5.54603e-07
GOTERM_BP_FAT	GO:0008104~protein localization	74	11.878	1.9531e-09	P62820, P55735, P61204, P55060, O14617, P31946, P49321, P53621, P49792, O15078, Q8N1F7, Q9HAV4, P62826, O43707, Q5HY54, O00629, Q16543, P52294, Q8WUM0, Q9Y490, Q92973, Q9UJY4, Q8WUM4, Q8TEX9, Q96P70, O75369, P49454, P35579, P06748, P38646, O76094, O60684, Q9P2E9, Q9UBF2, P62258, Q9BV73, Q10567, O95782, P31150, O60518, P63241, O00410, O00170, Q14974, P60953, Q9UIA9, P27797, P35606, P61981, Q96D46,…	543	882	13528	2.09024	4.52532e-06	5.02814e-07	3.41568e-06
GOTERM_BP_FAT	GO:0006913~nucleocytoplasmic transport	26	4.17335	2.84768e-09	Q14974, P55060, Q9UIA9, P27797, O95373, P49792, P52292, O00148, Q9HAV4, P62826, Q92900, O00629, P52294, Q8WUM0, Q92973, Q8TEX9, Q96P70, P06748, P38646, Q13838, O60684, O14980, Q8NI27, P35658, P63241, O00410	543	156	13528	4.15224	6.59806e-06	6.59808e-07	4.98017e-06
GOTERM_BP_FAT	GO:0045184~establishment of protein localization	67	10.7544	3.00625e-09	P62820, P55735, P61204, P55060, O14617, P31946, P49321, P53621, P49792, O15078, Q8N1F7, Q9HAV4, P62826, O43707, Q5HY54, O00629, Q16543, P52294, Q8WUM0, Q92973, Q9UJY4, Q8WUM4, Q8TEX9, Q96P70, P49454, P35579, P06748, P38646, O76094, O60684, Q9UBF2, Q9P2E9, P62258, O95782, Q10567, P31150, O60518, P63241, O00410, O00170, Q14974, Q9UIA9, P27797, P35606, P61981, Q96D46, O95373, P27348, P14625, Q9Y678,…	543	769	13528	2.17061	6.96546e-06	6.33225e-07	5.25748e-06
UP_SEQ_FEATURE	domain:Importin N-terminal	9	1.44462	3.03943e-09	O95373, Q14974, Q92973, P55060, Q9UIA9, O14980, Q8TEX9, Q96P70, O00410	623	14	19113	19.7222	6.99068e-06	5.37746e-07	5.31103e-06
GOTERM_BP_FAT	GO:0051169~nuclear transport	26	4.17335	3.7328e-09	Q14974, P55060, Q9UIA9, P27797, O95373, P49792, P52292, O00148, Q9HAV4, P62826, Q92900, O00629, P52294, Q8WUM0, Q92973, Q8TEX9, Q96P70, P06748, P38646, Q13838, O60684, O14980, Q8NI27, P35658, P63241, O00410	543	158	13528	4.09968	8.64885e-06	7.2074e-07	6.5281e-06
GOTERM_BP_FAT	GO:0046907~intracellular transport	60	9.63082	4.27236e-09	P55735, P55060, O14617, P31946, P53621, P49792, O00148, P62826, Q9HAV4, Q5HY54, O00629, Q16543, P52294, Q8WUM0, Q92973, Q9UJY4, Q8TEX9, Q96P70, P35579, P06748, P38646, O76094, O60684, P35580, P42704, Q9UBF2, P62258, Q7Z406, Q8NI27, O95782, Q10567, P63241, O00410, O00170, Q14974, Q9UIA9, P27797, P35606, P61981, P16615, P33176, O95373, P27348, Q9Y678, P52292, Q00610, P12004, Q92900, P55072, P63104,…	543	657	13528	2.2752	9.89901e-06	7.61466e-07	7.47172e-06
GOTERM_BP_FAT	GO:0015031~protein transport	66	10.5939	5.07678e-09	P62820, P55735, P61204, P55060, O14617, P31946, P49321, P53621, P49792, O15078, Q8N1F7, Q9HAV4, P62826, O43707, O00629, Q16543, P52294, Q8WUM0, Q92973, Q9UJY4, Q8WUM4, Q8TEX9, Q96P70, P49454, P35579, P06748, P38646, O76094, O60684, Q9UBF2, Q9P2E9, P62258, O95782, Q10567, P31150, O60518, P63241, O00410, O00170, Q14974, Q9UIA9, P27797, P35606, P61981, Q96D46, O95373, P27348, P14625, Q9Y678, P52292,…	543	762	13528	2.15786	1.17628e-05	8.40206e-07	8.87853e-06
SP_PIR_KEYWORDS	protein transport	43	6.90209	7.41051e-09	P62820, P61204, P55735, Q14974, P55060, Q9UIA9, P35606, O14617, Q96D46, P49321, P53621, O95373, Q9Y678, O15078, P49792, P52292, Q8N1F7, P62826, Q9HAV4, O43707, O00629, P52294, Q8WUM0, Q92973, Q6IQ22, Q9UJY4, Q8WUM4, Q8TEX9, Q96P70, Q99698, Q5SRE5, O60684, Q9UBF2, Q9P2E9, O14980, P48444, Q10567, O95782, O60518, P35658, P63241, O00410, P53618	623	485	19235	2.73735	3.57927e-06	1.98849e-07	1.06195e-05
INTERPRO	IPR001494:Importin-beta, N-terminal	9	1.44462	1.20391e-08	O95373, Q14974, Q92973, P55060, Q9UIA9, O14980, Q8TEX9, Q96P70, O00410	590	15	16659	16.9414	1.40977e-05	3.52445e-06	1.9404e-05
GOTERM_CC_FAT	GO:0031967~organelle envelope	55	8.82825	2.39517e-08	P24752, Q8IVL0, P55735, Q14573, P36551, P55060, Q13185, Q99714, P37802, P49792, Q8WXH0, P42166, Q8N1F7, P62826, P11498, O00629, P52294, Q8WUM0, P40926, Q92973, Q8TEX9, Q96P70, P49454, O60684, P42704, P10809, Q86UT6, P56537, P63241, O00410, Q9Y277, Q14974, Q9UIA9, O95573, P00505, P30086, P09874, Q96RQ3, O95373, P52292, O00429, P12004, Q9BYT8, Q9Y6D9, P46060, P34897, P54886, P19367, Q5SRE5, P31930,…	501	620	12782	2.26325	1.09698e-05	6.45286e-07	3.40657e-05
GOTERM_CC_FAT	GO:0031975~envelope	55	8.82825	2.63758e-08	P24752, Q8IVL0, P55735, Q14573, P36551, P55060, Q13185, Q99714, P37802, P49792, Q8WXH0, P42166, Q8N1F7, P62826, P11498, O00629, P52294, Q8WUM0, P40926, Q92973, Q8TEX9, Q96P70, P49454, O60684, P42704, P10809, Q86UT6, P56537, P63241, O00410, Q9Y277, Q14974, Q9UIA9, O95573, P00505, P30086, P09874, Q96RQ3, O95373, P52292, O00429, P12004, Q9BYT8, Q9Y6D9, P46060, P34897, P54886, P19367, Q5SRE5, P31930,…	501	622	12782	2.25597	1.208e-05	6.71117e-07	3.75135e-05
GOTERM_BP_FAT	GO:0006605~protein targeting	29	4.6549	3.63374e-08	O00170, Q14974, P55060, Q9UIA9, P27797, P31946, P61981, P27348, O95373, P49792, P52292, Q9HAV4, P62826, P63104, O00629, P52294, Q16543, Q92973, Q8TEX9, Q7Z3T8, Q96P70, P38646, O76094, O60684, P62258, O14980, P35658, P63241, O00410	543	215	13528	3.36042	8.41902e-05	4.20968e-06	6.35486e-05
GOTERM_MF_FAT	GO:0008565~protein transporter activity	18	2.88925	5.402e-08	O00629, P52294, Q14974, Q92973, P55060, Q9UIA9, Q8TEX9, Q7Z3T8, O14617, Q96P70, O60684, O95373, O14980, P52292, Q10567, Q9HAV4, O95782, O00410	524	87	12983	5.12622	4.08383e-05	3.40325e-06	8.23044e-05
GOTERM_BP_FAT	GO:0000059~protein import into nucleus, docking	9	1.44462	1.11378e-07	O95373, Q14974, Q92973, P55060, Q9UIA9, O14980, Q8TEX9, Q96P70, O00410	543	17	13528	13.1895	0.00025803	1.03225e-05	0.000194784
GOTERM_BP_FAT	GO:0006606~protein import into nucleus	15	2.4077	7.38667e-06	O00629, P52294, Q14974, Q92973, P55060, Q9UIA9, Q8TEX9, Q96P70, O60684, O95373, P49792, O14980, P52292, P62826, O00410	543	86	13528	4.34537	0.0169694	0.000417351	0.0129174
GOTERM_CC_FAT	GO:0012505~endomembrane system	57	9.14928	7.41675e-06	Q8IVL0, P55735, Q14573, P55060, O00291, Q13185, P37802, P53621, P49792, Q8WXH0, P42166, Q8N1F7, P62826, O00629, P52294, Q8WUM0, Q92973, Q8TEX9, Q96P70, P49454, O60684, P42704, Q9UBF2, Q9P2E9, P10809, O00763, O95782, Q10567, Q14789, P61158, P56537, P63241, O00410, Q14974, Q9UIA9, P35606, P09874, P16615, Q13492, O95373, P14625, Q9Y678, P52292, O75081, Q00610, P12004, Q9BZ29, Q9P212, Q9Y6D9, Q9Y6D5,…	501	782	12782	1.85964	0.00339112	0.000130641	0.0105481
GOTERM_BP_FAT	GO:0051170~nuclear import	15	2.4077	9.72617e-06	O00629, P52294, Q14974, Q92973, P55060, Q9UIA9, Q8TEX9, Q96P70, O60684, O95373, P49792, O14980, P52292, P62826, O00410	543	88	13528	4.24661	0.0222836	0.000523947	0.0170083
COG_ONTOLOGY	Intracellular trafficking and secretion	12	1.92616	1.09133e-05	O00629, O60684, Q96BY7, Q14974, Q9UBF2, Q92973, Q9Y678, P52292, Q8TEX9, O14617, O60518, O00410	111	42	1950	5.01931	0.000250975	0.000250975	0.00864993
GOTERM_BP_FAT	GO:0034504~protein localization in nucleus	15	2.4077	2.11369e-05	O00629, P52294, Q14974, Q92973, P55060, Q9UIA9, Q8TEX9, Q96P70, O60684, O95373, P49792, O14980, P52292, P62826, O00410	543	94	13528	3.97555	0.0477948	0.000998984	0.0369588
GOTERM_BP_FAT	GO:0017038~protein import	17	2.72873	6.87556e-05	O00629, O00170, P52294, Q14974, Q92973, P55060, Q9UIA9, Q8TEX9, Q96P70, O60684, O95373, P49792, O14980, P52292, P62826, O00410, P63104	543	131	13528	3.23304	0.14727	0.00265168	0.120175
GOTERM_BP_FAT	GO:0033365~protein localization in organelle	18	2.88925	7.56042e-05	O00629, O00170, P52294, Q14974, Q92973, P55060, Q9UIA9, Q8TEX9, Q96P70, O76094, O60684, O95373, P49792, O14980, P52292, P62826, O00410, P63104	543	146	13528	3.07152	0.160695	0.0027768	0.132138
GOTERM_BP_FAT	GO:0006607~NLS-bearing substrate import into nucleus	6	0.963082	9.98071e-05	O00629, P52294, O60684, Q14974, P52292, O00410	543	13	13528	11.4985	0.206471	0.00339517	0.174404
SP_PIR_KEYWORDS	transport	66	10.5939	0.0687958	P62820, Q14573, P55735, P61204, P55060, O14617, P49321, P53621, O15078, P49792, P38606, Q8N1F7, P13804, Q13428, P62826, Q9HAV4, O43707, Q5T1M5, P05023, O00629, P52294, Q8WUM0, Q92973, Q9UJY4, Q8WUM4, Q8TEX9, Q96P70, O60684, P42704, Q9UBF2, Q9P2E9, Q8NI27, O95782, Q10567, Q0VD83, O60518, P63241, Q9Y277, O00410, Q14974, Q9UIA9, P35606, P00505, P16615, Q9HBR0, Q96D46, O95373, Q9Y678, P52292, P38919,…	623	1670	19235	1.2202	1	0.262626	63.9917
GOTERM_CC_FAT	GO:0031090~organelle membrane	48	7.70465	0.269958	P24752, Q8IVL0, Q14573, O00291, Q13185, Q99714, O95573, P35606, P30086, P37802, P00505, P16615, Q96RQ3, P53621, Q9Y678, P14625, Q8WXH0, O00429, P42166, O75081, Q00610, P12004, P11498, Q9P212, P40926, Q9Y6D5, P34897, Q7Z3T8, P54886, P19367, P31930, P42704, Q9UBF2, Q9P2E9, P10809, P40939, Q86UT6, P48444, P25705, O95782, Q9P2R3, Q10567, Q14789, P43243, P61158, P56537, Q9Y277, P53618	501	1096	12782	1.11736	1	0.648056	98.8612
Annotation Cluster 10	Enrichment Score: 6.492916585149611
Category	Term	Count	%	PValue	Genes	List Total	Pop Hits	Pop Total	Fold Enrichment	Bonferroni	Benjamini	FDR
UP_SEQ_FEATURE	domain:RRM 2	20	3.21027	5.61062e-10	Q9H361, Q13151, P52597, P51991, P22626, P14866, Q9NZI8, P31943, P23246, Q15717, P55795, Q15020, Q9BWF3, O43390, P43243, O43719, O00425, P19338, A6NLN1, O60506	623	101	19113	6.07504	1.29044e-06	1.29044e-07	9.80384e-07
UP_SEQ_FEATURE	domain:RRM 1	20	3.21027	5.61062e-10	Q9H361, Q13151, P52597, P51991, P22626, P14866, Q9NZI8, P31943, P23246, Q15717, P55795, Q15020, Q9BWF3, O43390, P43243, O43719, O00425, P19338, A6NLN1, O60506	623	101	19113	6.07504	1.29044e-06	1.29044e-07	9.80384e-07
SMART	SM00360:RRM	23	3.69181	2.87866e-06	Q9H361, Q13151, P52597, Q4G0J3, P51991, P22626, P14866, O75821, Q9NZI8, P31943, P23246, Q15717, P55795, Q15020, Q9BWF3, P05455, O43390, P43243, O43719, O00425, P19338, A6NLN1, O60506	311	211	9079	3.18217	0.000595705	0.000297897	0.00362835
INTERPRO	IPR000504:RNA recognition motif, RNP-1	23	3.69181	5.9658e-06	Q9H361, Q13151, P52597, Q4G0J3, P51991, P22626, P14866, O75821, Q9NZI8, P31943, P23246, Q15717, P55795, Q15020, Q9BWF3, P05455, O43390, P43243, O43719, O00425, P19338, A6NLN1, O60506	590	211	16659	3.07781	0.00696163	0.000698354	0.00961493
INTERPRO	IPR012677:Nucleotide-binding, alpha-beta plait	23	3.69181	6.94905e-06	Q9H361, Q13151, P52597, Q4G0J3, P51991, P22626, P14866, O75821, Q9NZI8, P31943, P23246, Q15717, P55795, Q15020, Q9BWF3, P05455, O43390, P43243, O43719, O00425, P19338, A6NLN1, O60506	590	213	16659	3.04891	0.00810435	0.000739487	0.0111995
UP_SEQ_FEATURE	domain:RRM 3	10	1.60514	2.93559e-05	Q15717, Q9H361, P55795, P52597, P14866, O43390, P31943, P19338, A6NLN1, O60506	623	50	19113	6.13579	0.0652905	0.00210776	0.0512833
Annotation Cluster 11	Enrichment Score: 5.476262830075823
Category	Term	Count	%	PValue	Genes	List Total	Pop Hits	Pop Total	Fold Enrichment	Bonferroni	Benjamini	FDR
GOTERM_BP_FAT	GO:0034621~cellular macromolecular complex subunit organization	37	5.939	3.3285e-07	O14744, P34932, Q14974, O60610, P55060, Q92794, Q96KK5, Q02790, Q9UIA9, P27797, O00291, Q2NL82, P49321, Q13492, O95373, P49736, P62263, P35749, Q5HY54, Q8WUM0, Q92973, O94906, P17987, O75643, Q8TEX9, Q14152, Q96P70, P49454, P06748, Q92499, Q99733, Q9UNY4, P10809, O14980, Q15459, P56537, O00410	543	357	13528	2.58207	0.000770917	2.85631e-05	0.000582104
GOTERM_BP_FAT	GO:0034622~cellular macromolecular complex assembly	34	5.45746	5.40083e-07	O14744, P34932, Q14974, O60610, P55060, Q92794, Q96KK5, Q02790, Q9UIA9, P27797, O00291, Q2NL82, Q13492, O95373, P49736, P62263, P35749, Q5HY54, Q92973, O94906, P17987, O75643, Q8TEX9, Q14152, Q96P70, P49454, P06748, Q92499, Q99733, P10809, O14980, Q15459, P56537, O00410	543	318	13528	2.6637	0.00125059	4.17115e-05	0.00094452
GOTERM_BP_FAT	GO:0043933~macromolecular complex subunit organization	57	9.14928	8.54697e-07	O14744, Q14573, O60610, P55060, Q96KK5, O00291, P30153, Q99714, P14174, P31946, P17858, P49321, O95163, P08758, P62263, Q5HY54, Q8WUM0, Q92973, O94906, P17987, Q8TEX9, Q96P70, P49454, P06748, P23921, Q99733, P10809, Q9UNY4, Q9NU22, Q15393, Q15459, P56537, O00410, O95996, P34932, Q01813, Q14974, Q92794, P14868, Q9UIA9, Q02790, P27797, P30086, Q2NL82, Q13492, O95373, P49736, P55072, P35749, O75643,…	543	710	13528	2.00009	0.00197837	5.82434e-05	0.00149473
GOTERM_BP_FAT	GO:0065003~macromolecular complex assembly	54	8.66774	1.24324e-06	O14744, Q14573, O60610, P55060, Q96KK5, O00291, P30153, Q99714, P14174, P31946, P17858, O95163, P08758, P62263, Q5HY54, Q92973, O94906, P17987, Q8TEX9, Q96P70, P49454, P06748, P23921, Q99733, P10809, Q9NU22, Q15393, Q15459, P56537, O00410, O95996, P34932, Q01813, Q14974, Q92794, P14868, Q9UIA9, Q02790, P27797, P30086, Q2NL82, Q13492, O95373, P49736, P55072, P35749, O75643, Q14152, Q92499, P07814,…	543	665	13528	2.02305	0.00287645	8.00134e-05	0.00217423
GOTERM_BP_FAT	GO:0043623~cellular protein complex assembly	20	3.21027	2.62121e-05	P34932, Q14974, Q92973, O60610, P55060, P17987, Q9UIA9, Q02790, O00291, Q8TEX9, P27797, Q96P70, P49454, Q13492, O95373, P10809, O14980, P35749, O00410, Q5HY54	543	162	13528	3.07573	0.0589267	0.00116729	0.0458312
GOTERM_BP_FAT	GO:0006461~protein complex assembly	41	6.58106	3.04292e-05	O95996, P34932, Q14573, Q14974, Q01813, O60610, P55060, P14868, Q9UIA9, Q02790, O00291, P27797, Q99714, P30153, P14174, P30086, P31946, P17858, Q13492, O95373, O95163, P08758, P55072, P35749, Q5HY54, Q92973, P17987, Q8TEX9, Q96P70, P49454, P06748, P23921, P07814, P10809, O14980, Q9NU22, Q9P219, P78347, Q15393, O43593, O00410	543	505	13528	2.02268	0.0680773	0.00132941	0.0532027
GOTERM_BP_FAT	GO:0070271~protein complex biogenesis	41	6.58106	3.04292e-05	O95996, P34932, Q14573, Q14974, Q01813, O60610, P55060, P14868, Q9UIA9, Q02790, O00291, P27797, Q99714, P30153, P14174, P30086, P31946, P17858, Q13492, O95373, O95163, P08758, P55072, P35749, Q5HY54, Q92973, P17987, Q8TEX9, Q96P70, P49454, P06748, P23921, P07814, P10809, O14980, Q9NU22, Q9P219, P78347, Q15393, O43593, O00410	543	505	13528	2.02268	0.0680773	0.00132941	0.0532027
Annotation Cluster 12	Enrichment Score: 5.416779707836729
Category	Term	Count	%	PValue	Genes	List Total	Pop Hits	Pop Total	Fold Enrichment	Bonferroni	Benjamini	FDR
GOTERM_BP_FAT	GO:0006096~glycolysis	14	2.24719	2.38921e-08	P60174, Q01813, P40926, P18669, P04075, P06733, P00338, P19367, P17858, P11177, P00558, P10155, P14618, P09104	543	47	13528	7.42103	5.53564e-05	2.91357e-06	4.17836e-05
GOTERM_BP_FAT	GO:0006007~glucose catabolic process	15	2.4077	4.63611e-08	P60174, Q01813, P40926, P18669, P04075, P06733, P00338, P19367, P17858, P11177, P00558, P52209, P09104, P10155, P14618	543	58	13528	6.44313	0.000107413	4.88266e-06	8.10786e-05
SP_PIR_KEYWORDS	glycolysis	12	1.92616	1.07519e-07	P60174, P11177, Q01813, P18669, P00558, P00338, P06733, P04075, P09104, P14618, P19367, P17858	623	44	19235	8.4204	5.19305e-05	2.2579e-06	0.000154079
KEGG_PATHWAY	hsa00010:Glycolysis / Gluconeogenesis	16	2.56822	1.90823e-07	P60174, Q01813, P18669, P04075, P06733, P00338, P11766, P09622, P19367, P30837, P17858, P05091, P11177, P00558, P09104, P14618	261	60	5085	5.1954	2.69056e-05	1.34529e-05	0.000225433
GOTERM_BP_FAT	GO:0044275~cellular carbohydrate catabolic process	17	2.72873	2.14429e-07	P60174, Q01813, P40926, P18669, P04075, P06733, P00338, P06737, P19367, P17858, P11177, P00558, P52209, P09104, P11216, P10155, P14618	543	85	13528	4.98269	0.000496709	1.91088e-05	0.000375004
GOTERM_BP_FAT	GO:0019320~hexose catabolic process	15	2.4077	4.70767e-07	P60174, Q01813, P40926, P18669, P04075, P06733, P00338, P19367, P17858, P11177, P00558, P52209, P09104, P10155, P14618	543	69	13528	5.41597	0.00109017	3.89552e-05	0.000823298
GOTERM_BP_FAT	GO:0046365~monosaccharide catabolic process	15	2.4077	6.80859e-07	P60174, Q01813, P40926, P18669, P04075, P06733, P00338, P19367, P17858, P11177, P00558, P52209, P09104, P10155, P14618	543	71	13528	5.2634	0.00157631	4.78035e-05	0.00119071
GOTERM_BP_FAT	GO:0046164~alcohol catabolic process	15	2.4077	3.5673e-06	P60174, Q01813, P40926, P18669, P04075, P06733, P00338, P19367, P17858, P11177, P00558, P52209, P09104, P10155, P14618	543	81	13528	4.6136	0.0082314	0.000211912	0.0062385
GOTERM_BP_FAT	GO:0016052~carbohydrate catabolic process	17	2.72873	6.68025e-06	P60174, Q01813, P40926, P18669, P04075, P06733, P00338, P06737, P19367, P17858, P11177, P00558, P52209, P09104, P11216, P10155, P14618	543	109	13528	3.88558	0.015359	0.00038688	0.0116821
GOTERM_BP_FAT	GO:0006006~glucose metabolic process	20	3.21027	1.15585e-05	P11498, P60174, Q01813, P40926, P18669, P00338, P04075, P06733, P06737, P19367, P62136, P17858, P11177, P00558, P35573, P52209, P09104, P11216, P10155, P14618	543	153	13528	3.25666	0.0264258	0.000608478	0.0202122
GOTERM_BP_FAT	GO:0019318~hexose metabolic process	21	3.37079	8.91604e-05	P11498, Q06210, P60174, Q01813, P40926, P18669, P00338, P04075, P06733, P06737, P19367, P62136, P17858, P11177, P00558, P52209, P35573, P09104, P11216, P10155, P14618	543	192	13528	2.72491	0.18665	0.00312532	0.155814
BIOCARTA	h_glycolysisPathway:Glycolysis Pathway	6	0.963082	0.000224644	P60174, P18669, P00558, P06733, P19367, P17858	86	11	1437	9.11416	0.0285664	0.0285664	0.260938
GOTERM_BP_FAT	GO:0005996~monosaccharide metabolic process	22	3.5313	0.000234362	P11498, Q06210, P60174, P40926, Q01813, P18669, P00338, P04075, P06733, P06737, P19367, P62136, P17858, P11177, P00558, P60891, P52209, P35573, P09104, P11216, P10155, P14618	543	222	13528	2.4689	0.419044	0.00712033	0.409074
GOTERM_BP_FAT	GO:0006091~generation of precursor metabolites and energy	27	4.33387	0.000362369	Q06210, Q01813, P06733, P04075, P48735, P06737, P09622, P17858, P62136, P38606, P35573, P13804, P10155, P09104, P11216, P60174, P40926, P18669, P00338, P19367, P11177, P31930, P00558, P25705, P14618, P07954, Q99798	543	313	13528	2.14908	0.568186	0.0101887	0.631839
UP_SEQ_FEATURE	binding site:Substrate	22	3.5313	0.000765408	P25325, P11498, P60174, P00367, P36551, Q01813, P40926, P00338, P04075, P06733, Q99714, P14174, P41250, P48735, P17858, P23921, P00558, Q96KP4, P09960, P09104, P07954, P14618	623	297	19113	2.27252	0.828147	0.0367772	1.32906
Annotation Cluster 13	Enrichment Score: 5.380822556076149
Category	Term	Count	%	PValue	Genes	List Total	Pop Hits	Pop Total	Fold Enrichment	Bonferroni	Benjamini	FDR
GOTERM_CC_FAT	GO:0005852~eukaryotic translation initiation factor 3 complex	8	1.28411	6.58271e-07	Q13347, O15371, O75821, Q14152, O00303, Q99613, Q9Y262	501	15	12782	13.6069	0.000301443	1.25619e-05	0.000936233
SP_PIR_KEYWORDS	Initiation factor	12	1.92616	6.69489e-07	O43432, Q13347, O15371, O75821, Q14152, O00303, Q99613, P56537, P41091, P60842, Q9Y262	623	52	19235	7.12495	0.000323311	1.0105e-05	0.000959397
GOTERM_MF_FAT	GO:0008135~translation factor activity, nucleic acid binding	17	2.72873	1.70252e-06	P49411, P35716, O75821, Q92616, Q14152, P60842, Q9Y262, O43432, Q13347, P26641, O15371, O00303, Q99613, P56537, P63241, P41091	524	98	12983	4.298	0.00128628	8.04409e-05	0.00259392
GOTERM_MF_FAT	GO:0003743~translation initiation factor activity	12	1.92616	2.73912e-05	O43432, Q13347, O15371, O75821, Q14152, O00303, Q99613, P56537, P41091, P60842, Q9Y262	524	61	12983	4.87411	0.0204951	0.00094083	0.0417249
GOTERM_BP_FAT	GO:0006413~translational initiation	10	1.60514	6.06788e-05	Q13347, O15371, O75821, Q14152, O00303, Q99613, P23396, P41091, Q9Y262	543	45	13528	5.53632	0.131161	0.00238016	0.106065
Annotation Cluster 14	Enrichment Score: 5.352741338112014
Category	Term	Count	%	PValue	Genes	List Total	Pop Hits	Pop Total	Fold Enrichment	Bonferroni	Benjamini	FDR
GOTERM_BP_FAT	GO:0006913~nucleocytoplasmic transport	26	4.17335	2.84768e-09	Q14974, P55060, Q9UIA9, P27797, O95373, P49792, P52292, O00148, Q9HAV4, P62826, Q92900, O00629, P52294, Q8WUM0, Q92973, Q8TEX9, Q96P70, P06748, P38646, Q13838, O60684, O14980, Q8NI27, P35658, P63241, O00410	543	156	13528	4.15224	6.59806e-06	6.59808e-07	4.98017e-06
GOTERM_BP_FAT	GO:0051169~nuclear transport	26	4.17335	3.7328e-09	Q14974, P55060, Q9UIA9, P27797, O95373, P49792, P52292, O00148, Q9HAV4, P62826, Q92900, O00629, P52294, Q8WUM0, Q92973, Q8TEX9, Q96P70, P06748, P38646, Q13838, O60684, O14980, Q8NI27, P35658, P63241, O00410	543	158	13528	4.09968	8.64885e-06	7.2074e-07	6.5281e-06
GOTERM_BP_FAT	GO:0006403~RNA localization	20	3.21027	1.33298e-08	Q8WUM0, P22626, Q9UIA9, Q14008, Q9NZI8, P06748, Q13838, Q5SRE5, P42704, P49792, O14980, Q8NI27, Q8N1F7, O00148, P62826, P38919, P61326, Q92900, P35658, P63241	543	100	13528	4.98269	3.08846e-05	1.71584e-06	2.33118e-05
GOTERM_BP_FAT	GO:0051236~establishment of RNA localization	19	3.04976	4.71946e-08	Q8WUM0, P22626, Q9UIA9, Q14008, P06748, Q13838, Q5SRE5, P42704, P49792, O14980, Q8NI27, Q8N1F7, O00148, P62826, P38919, P61326, Q92900, P35658, P63241	543	97	13528	4.87995	0.000109344	4.75434e-06	8.25364e-05
GOTERM_BP_FAT	GO:0050657~nucleic acid transport	19	3.04976	4.71946e-08	Q8WUM0, P22626, Q9UIA9, Q14008, P06748, Q13838, Q5SRE5, P42704, P49792, O14980, Q8NI27, Q8N1F7, O00148, P62826, P38919, P61326, Q92900, P35658, P63241	543	97	13528	4.87995	0.000109344	4.75434e-06	8.25364e-05
GOTERM_BP_FAT	GO:0050658~RNA transport	19	3.04976	4.71946e-08	Q8WUM0, P22626, Q9UIA9, Q14008, P06748, Q13838, Q5SRE5, P42704, P49792, O14980, Q8NI27, Q8N1F7, O00148, P62826, P38919, P61326, Q92900, P35658, P63241	543	97	13528	4.87995	0.000109344	4.75434e-06	8.25364e-05
GOTERM_BP_FAT	GO:0015931~nucleobase, nucleoside, nucleotide and nucleic acid transport	20	3.21027	1.04574e-07	Q8WUM0, P22626, Q9UIA9, Q14008, P06748, Q13838, Q5SRE5, P42704, P49792, O14980, Q8NI27, Q8N1F7, O00148, P62826, P38919, P61326, Q92900, P35658, P63241, Q9Y277	543	113	13528	4.40946	0.000242269	1.00957e-05	0.000182885
GOTERM_BP_FAT	GO:0051168~nuclear export	14	2.24719	5.43824e-07	Q8WUM0, Q9UIA9, P27797, P06748, P38646, Q13838, O14980, Q8NI27, O00148, P62826, Q9HAV4, Q92900, P35658, P63241	543	60	13528	5.81314	0.00125925	4.06456e-05	0.000951062
SP_PIR_KEYWORDS	mRNA transport	13	2.08668	4.12998e-06	Q5SRE5, Q8WUM0, P42704, P49792, Q9UIA9, O14980, Q8NI27, Q8N1F7, P38919, P61326, P35658, P63241, Q13838	623	74	19235	5.42395	0.00199279	4.86521e-05	0.00591824
GOTERM_BP_FAT	GO:0051028~mRNA transport	15	2.4077	8.48529e-06	Q8WUM0, Q9UIA9, Q13838, Q5SRE5, P42704, P49792, O14980, Q8NI27, Q8N1F7, O00148, P61326, P38919, Q92900, P35658, P63241	543	87	13528	4.29542	0.0194685	0.000467998	0.0148385
GOTERM_BP_FAT	GO:0006405~RNA export from nucleus	8	1.28411	0.00109508	Q8WUM0, Q8NI27, O00148, P62826, Q92900, P63241, P06748, Q13838	543	41	13528	4.86116	0.92103	0.0269285	1.89794
SP_PIR_KEYWORDS	nuclear pore complex	7	1.1236	0.0016789	Q5SRE5, Q8WUM0, P49792, Q9UIA9, Q8N1F7, P35658, P63241	623	40	19235	5.40309	0.55585	0.0132167	2.37919
GOTERM_BP_FAT	GO:0006406~mRNA export from nucleus	6	0.963082	0.00950068	Q8WUM0, Q8NI27, O00148, Q92900, P63241, Q13838	543	33	13528	4.52972	1	0.144238	15.3756
SP_PIR_KEYWORDS	translocation	8	1.28411	0.00990277	Q5SRE5, Q8WUM0, Q9P2E9, P49792, Q9UIA9, Q8N1F7, P35658, P63241	623	74	19235	3.33782	0.991827	0.0590324	13.2914
[truncated: 2,078 more rows]
